# Supplementary material
Source: publisher figshare collection journal article supplement (https://acs.figshare.com/ndownloader/files/5305123)
Supplement: Supplementary file 1 [file 5305123]

## Sheet: Cover Page
Supporting Information
Automated glycan sequencing from tandem mass spectra of N-linked glycopeptides
Chuan-Yih Yu1, Anoop Mayampurath2, Rui Zhu3, Lauren Zacharias3, Ehwang Song3, Lei Wang1, Yehia Mechref3, Haixu Tang1*
1School of Informatics and Computing, Indiana University, Bloomington, IN, USA
2Computation Institute, University of Chicago, Chicago, IL, USA,
3Department of Chemistry and Biochemistry, Texas Tech University, Lubbock, TX, USA
*Corresponding author: Haixu Tang (Email: hatang@indiana.edu)

## Sheet: 361_RefinedwResult_2Labels_New
	Mannuel verification				GlycoSeq Result
Category	MSn_Scan	Y1	HexNAc-Hex-Fuc-NeuAc-NeuGc	peptide	MSn_Scan	Parent_Scan	Parent_Mz	Mono_Mz	Charge_State	Monoisotopic_Mass	CID_time	Y1	Peptide	Peptide_Mod	Identified_By_Mascot	Category	Category_Probability	Core_Score	Branch_Score	Append_Glycan_Score	MatchWithPrecursorMW	PPM	Full_Glycan(HexNac-Hex-deHex-NeuAC-NeuGc)	Append_Glycan(HexNac-Hex-deHex-NeuAC-NeuGc)	IUPAC
Sequence records with mannuel verification	401	681.219	NPNGTVTVISR	2-5-0-0-0	401	396	792.353	792.02	3	2373.04	15.51	681.219	NPNGTVTVISR	-	No	1	0.56	275.21	27.78	0	TRUE	3.5	2-5-0-0-0	0-1-0-0-0	Hex-Hex-(Hex-)Hex-HexNAc-HexNAc+HexNAc1	Hex-(Hex-Hex-)Hex-HexNAc-HexNAc+HexNAc1
	577	738.727	VVANGTGTQGQLK/ALSPNSTISSAPK	2-6-0-0-0	577	572	1326.59	1326.08	2	2650.15	16.52	738.727	VVANGTGTQGQLK	-	No	1	0.54	60.84	11.23	0	TRUE	6.26	2-6-0-0-0	0-1-0-0-0	Hex-Hex-Hex-(Hex-)Hex-HexNAc-HexNAc+HexNAc1	Hex-Hex-(Hex-Hex-)Hex-HexNAc-HexNAc+HexNAc1
	608	738.773	VVANGTGTQGQLK/ALSPNSTISSAPK	2-5-0-0-0	608	605	1245.07	1245.07	2	2488.12	16.71	738.773	VVANGTGTQGQLK	-	No	1	0.78	74.16	7.82	0	TRUE	2.06	2-5-0-0-0	0-1-0-0-0	Hex-Hex-(Hex-)Hex-HexNAc-HexNAc+HexNAc1	Hex-(Hex-Hex-)Hex-HexNAc-HexNAc+HexNAc1
	630	738.737	VVANGTGTQGQLK/ALSPNSTISSAPK	2-4-0-0-0	630	627	1164.54	1164.04	2	2326.07	16.84	738.737	VVANGTGTQGQLK	-	No	1	0.7	134.9	0	0	TRUE	3.46	2-4-0-0-0	0-1-0-0-0	Hex-(Hex-)Hex-HexNAc-HexNAc+HexNAc1
	652	738.71	ALSPNSTISSAPK/VVANGTGTQGQLK	2-3-0-0-0	652	649	1083.01	1083.01	2	2164	16.97	1272.82	-	-	No	0	1	112.64	0	-1	TRUE	-	3-3-0-0-0	1-0-0-0-0	Hex-(Hex-)Hex-HexNAc-HexNAc+Hex1
	698	672.657	NNHTASILDR	2-8-0-0-0	698	693	948.729	948.392	3	2842.15	17.22	672.657	NNHTASILDR	-	No	1	0.99	238.1	186.73	0	TRUE	1.12	2-8-0-0-0	0-1-0-0-0	Hex-Hex-Hex-Hex-Hex-(Hex-)Hex-HexNAc-HexNAc+HexNAc1	Hex-Hex-Hex-Hex-(Hex-Hex-)Hex-HexNAc-HexNAc+HexNAc1	Hex-Hex-Hex-(Hex-Hex-Hex-)Hex-HexNAc-HexNAc+HexNAc1
	711	738.7	ALSPNSTISSAPK/VVANGTGTQGQLK	2-4-1-0-0	711	704	1237.57	1237.06	2	2472.11	17.29	738.704	-	-	No	0	0.99	157.78	9.94	-1	TRUE	-	2-4-1-0-0	0-0-1-0-0	Hex-Hex-(Hex-)Hex-HexNAc-HexNAc+DeHex1	Hex-(Hex-Hex-)Hex-HexNAc-HexNAc+DeHex1
	718	738.687	VVANGTGTQGQLK/ALSPNSTISSAPK	2-3-1-0-0	718	715	1156.55	1156.04	2	2310.07	17.34	738.687	VVANGTGTQGQLK	-	No	1	0.73	204.61	0	0	TRUE	2.64	2-3-1-0-0	0-0-1-0-0	Hex-(Hex-)Hex-HexNAc-HexNAc+DeHex1
	903	713.08	DAGVVCTNETR	2-3-0-0-0	903	902	1057.45	1057.45	2	2112.88	18.42	1242.95	-	-	No	0	1	74.62	0	0	FALSE	-	2-3-0-0-0		Hex-(Hex-)Hex-HexNAc-HexNAc+Hex
	942	713.092	DAGVVCTNETR	2-3-1-0-0	942	935	1130.47	1130.47	2	2258.92	18.67	713.092	DAGVVCTNETR	-	No	1	0.59	74.55	0	0	TRUE	1.41	2-3-1-0-0	0-0-1-0-0	Hex-(Hex-)Hex-HexNAc-HexNAc+DeHex1
	1219	859.247	AEPPLNASASDQGEK	2-6-0-0-0	1219	1210	965.4	964.734	3	2891.18	20.29	859.247	AEPPLNASASDQGEK	-	No	1	0.74	156.25	18.2	0	TRUE	2.53	2-6-0-0-0	0-1-0-0-0	Hex-Hex-Hex-(Hex-)Hex-HexNAc-HexNAc+HexNAc1	Hex-Hex-(Hex-Hex-)Hex-HexNAc-HexNAc+HexNAc1
	1602	671.599	FGCEIENNR	3-3-1-0-0	1602	1595	1190.49	1190.49	2	2378.96	22.56	671.599	FGCEIENNR	-	No	1	0.67	134.15	7.43	0	TRUE	6.05	3-3-1-0-0	0-0-1-0-0	HexNAc-Hex-(Hex-)Hex-HexNAc-HexNAc+DeHex1	Hex-(HexNAc-Hex-)Hex-HexNAc-HexNAc+DeHex1
	1644	1120.34	ENGTDTVQEEEESPAEGSK	2-6-0-0-0	1644	1639	1708.18	1707.68	2	3413.35	22.82	1120.34	ENGTDTVQEEEESPAEGSK	-	No	1	0.77	215.68	106.88	0	TRUE	6.01	2-6-0-0-0	0-1-0-0-0	Hex-Hex-Hex-(Hex-)Hex-HexNAc-HexNAc+HexNAc1	Hex-Hex-(Hex-Hex-)Hex-HexNAc-HexNAc+HexNAc1
	1697	1120.45	ENGTDTVQEEEESPAEGSK	2-5-0-0-0	1697	1694	1085.43	1084.76	3	3251.26	23.14	1120.45	-	-	No	1	0.73	119.29	0.99	0	FALSE	-	2-4-0-0-0		Hex-(Hex-Hex-)Hex-HexNAc-HexNAc+Hex	Hex-Hex-(Hex-)Hex-HexNAc-HexNAc+Hex
	1708	1120.27	ENGTDTVQEEEESPAEGSK	2-5-0-0-0	1708	1705	1627.15	1626.64	2	3251.27	23.21	1120.27	ENGTDTVQEEEESPAEGSK	-	No	0	0.56	257.4	17.67	0	TRUE	0.83	2-5-0-0-0	0-1-0-0-0	Hex-Hex-(Hex-)Hex-HexNAc-HexNAc+HexNAc1	Hex-(Hex-Hex-)Hex-HexNAc-HexNAc+HexNAc1
	1824	1120.42	ENGTDTVQEEEESPAEGSK	2-3-1-0-0	1824	1815	1025.76	1025.42	3	3073.22	23.89	1120.42	-	-	No	1	0.78	125.82	0	0	FALSE	-	2-3-0-0-0		Hex-(Hex-)Hex-HexNAc-HexNAc+Hex	Hex-(Hex-)Hex-HexNAc-(DeHex-)HexNAc+Hex
	1827	1120.26	ENGTDTVQEEEESPAEGSK	2-3-1-0-0	1827	1826	1538.12	1537.62	2	3073.23	23.91	1120.26	ENGTDTVQEEEESPAEGSK	-	No	0	0.68	216.34	0	0	TRUE	0.24	2-3-1-0-0	0-0-1-0-0	Hex-(Hex-)Hex-HexNAc-HexNAc+DeHex1
	2095	1107.61	GASNLTWR	2-5-0-0-0	2095	2090	1061.45	1060.95	2	2119.89	25.51	1107.61	GASNLTWR	-	No	0	0.6	106.15	0.05	0	TRUE	4.38	2-5-0-0-0	0-1-0-0-0	Hex-Hex-(Hex-)Hex-HexNAc-HexNAc+HexNAc1	Hex-(Hex-Hex-)Hex-HexNAc-HexNAc+HexNAc1
	2108	738.653	ALSPNSTISSAPK	2-6-0-0-0	2108	2101	1326.58	1326.08	2	2650.15	25.59	738.653	ALSPNSTISSAPK	-	No	1	0.77	65.95	28.86	0	TRUE	4.51	2-6-0-0-0	0-1-0-0-0	Hex-Hex-Hex-(Hex-)Hex-HexNAc-HexNAc+HexNAc1	Hex-Hex-(Hex-Hex-)Hex-HexNAc-HexNAc+HexNAc1
	2154	837.754	TVLENSTSYEEAK	2-8-0-0-0	2154	2145	1059.09	1058.43	3	3172.28	25.87	837.754	TVLENSTSYEEAK	-	No	1	0.77	224.17	114.53	0	TRUE	0.15	2-8-0-0-0	0-1-0-0-0	Hex-Hex-Hex-Hex-Hex-(Hex-)Hex-HexNAc-HexNAc+HexNAc1	Hex-Hex-Hex-Hex-(Hex-Hex-)Hex-HexNAc-HexNAc+HexNAc1	Hex-Hex-Hex-(Hex-Hex-Hex-)Hex-HexNAc-HexNAc+HexNAc1
	2174	837.718	TVLENSTSYEEAK	2-7-0-0-0	2174	2167	1004.42	1004.42	3	3010.23	25.98	837.718	TVLENSTSYEEAK	-	No	1	0.7	256.26	87.5	0	TRUE	1.22	2-7-0-0-0	0-1-0-0-0	Hex-Hex-Hex-Hex-(Hex-)Hex-HexNAc-HexNAc+HexNAc1	Hex-Hex-Hex-(Hex-Hex-)Hex-HexNAc-HexNAc+HexNAc1	Hex-Hex-(Hex-Hex-Hex-)Hex-HexNAc-HexNAc+HexNAc1
	2176	1128.65	LLNINPNK	5-6-1-0-0	2176	2167	1530.67	1530.17	2	3058.32	25.99	584.782	-	-	No	0	0.59	103.82	83.83	0	FALSE	-	3-6-0-0-0		Hex-(Hex-)Hex-(Hex-HexNAc-Hex-)Hex-HexNAc-HexNAc+Hex	Hex-HexNAc-(Hex-Hex-)Hex-(Hex-)Hex-HexNAc-HexNAc+Hex	Hex-HexNAc-(Hex-)Hex-(Hex-Hex-)Hex-HexNAc-HexNAc+Hex	Hex-Hex-Hex-(HexNAc-)Hex-(Hex-)Hex-HexNAc-HexNAc+Hex	Hex-Hex-(Hex-HexNAc-)Hex-(Hex-)Hex-HexNAc-HexNAc+Hex	Hex-Hex-(HexNAc-)Hex-(Hex-Hex-)Hex-HexNAc-HexNAc+Hex	HexNAc-(Hex-Hex-)Hex-(Hex-Hex-)Hex-HexNAc-HexNAc+Hex	HexNAc-(Hex-)Hex-(Hex-Hex-Hex-)Hex-HexNAc-HexNAc+Hex	HexNAc-(Hex-)Hex-(Hex-(Hex-)Hex-)Hex-HexNAc-HexNAc+Hex	Hex-HexNAc-Hex-(Hex-Hex-Hex-)Hex-HexNAc-HexNAc+Hex	Hex-Hex-(Hex-)Hex-(HexNAc-Hex-)Hex-HexNAc-HexNAc+Hex	Hex-(Hex-Hex-)Hex-(HexNAc-Hex-)Hex-HexNAc-HexNAc+Hex	Hex-Hex-Hex-Hex-(HexNAc-Hex-)Hex-HexNAc-HexNAc+Hex	Hex-HexNAc-Hex-(Hex-(Hex-)Hex-)Hex-HexNAc-HexNAc+Hex	Hex-Hex-Hex-(HexNAc-(Hex-)Hex-)Hex-HexNAc-HexNAc+Hex	Hex-(Hex-)Hex-(HexNAc-(Hex-)Hex-)Hex-HexNAc-HexNAc+Hex	Hex-Hex-Hex-(Hex-HexNAc-Hex-)Hex-HexNAc-HexNAc+Hex
	2190	837.698	TVLENSTSYEEAK	2-7-0-0-0	2190	2189	1506.62	1506.12	2	3010.22	26.07	837.698	TVLENSTSYEEAK	-	No	1	0.84	43.91	18.48	0	TRUE	1.14	2-7-0-0-0	0-1-0-0-0	Hex-Hex-Hex-Hex-(Hex-)Hex-HexNAc-HexNAc+HexNAc1	Hex-Hex-Hex-(Hex-Hex-)Hex-HexNAc-HexNAc+HexNAc1	Hex-Hex-(Hex-Hex-Hex-)Hex-HexNAc-HexNAc+HexNAc1
	2201	837.787	TVLENSTSYEEAK	2-6-0-0-0	2201	2200	950.733	950.396	3	2848.16	26.13	837.787	TVLENSTSYEEAK	-	No	1	0.84	222.68	19.99	0	TRUE	1.8	2-6-0-0-0	0-1-0-0-0	Hex-Hex-Hex-(Hex-)Hex-HexNAc-HexNAc+HexNAc1	Hex-Hex-(Hex-Hex-)Hex-HexNAc-HexNAc+HexNAc1
	2207	837.701	TVLENSTSYEEAK	2-6-0-0-0	2207	2200	1425.6	1425.09	2	2848.17	26.17	837.701	TVLENSTSYEEAK	-	No	1	0.75	49.58	12.54	0	TRUE	1.29	2-6-0-0-0	0-1-0-0-0	Hex-Hex-Hex-(Hex-)Hex-HexNAc-HexNAc+HexNAc1	Hex-Hex-(Hex-Hex-)Hex-HexNAc-HexNAc+HexNAc1
	2247	837.696	TVLENSTSYEEAK	2-5-0-0-0	2247	2244	896.377	896.377	3	2686.11	26.41	837.696	TVLENSTSYEEAK	-	No	0	0.98	205.88	4.44	0	TRUE	3.64	2-5-0-0-0	0-1-0-0-0	Hex-Hex-(Hex-)Hex-HexNAc-HexNAc+HexNAc1	Hex-(Hex-Hex-)Hex-HexNAc-HexNAc+HexNAc1
	2260	1128.68	LLNINPNK	2-7-0-0-0	2260	2255	1234.05	1233.55	2	2465.08	26.48	1128.68	LLNINPNK	-	No	0	0.65	110.02	0.42	-3	TRUE	3.96	2-7-0-0-0	0-3-0-0-0	Hex-Hex-(Hex-)Hex-HexNAc-HexNAc+HexNAc3	Hex-(Hex-Hex-)Hex-HexNAc-HexNAc+HexNAc3
	2271	837.757	TVLENSTSYEEAK	2-5-0-0-0	2271	2266	1344.56	1344.06	2	2686.11	26.54	837.757	TVLENSTSYEEAK	-	No	1	0.7	65.57	9.14	0	TRUE	3.18	2-5-0-0-0	0-1-0-0-0	Hex-Hex-(Hex-)Hex-HexNAc-HexNAc+HexNAc1	Hex-(Hex-Hex-)Hex-HexNAc-HexNAc+HexNAc1
	2300	565.026	LLNINPNK	2-6-0-0-0	2300	2299	1153.02	1152.51	2	2303.01	26.71	1128.66	LLNINPNK	-	No	1	0.78	105.77	0.06	-2	TRUE	1.59	2-6-0-0-0	0-2-0-0-0	Hex-Hex-(Hex-)Hex-HexNAc-HexNAc+HexNAc2	Hex-(Hex-Hex-)Hex-HexNAc-HexNAc+HexNAc2
	2304	1128.68	LLNINPNK	3-6-0-0-0	2304	2299	1254.56	1254.05	2	2506.09	26.74	1128.68	LLNINPNK	-	No	1	0.94	153.09	29.2	-3	TRUE	3.31	3-6-0-0-0	1-2-0-0-0	Hex-Hex-(Hex-)Hex-HexNAc-HexNAc+Hex1HexNAc2	Hex-(Hex-Hex-)Hex-HexNAc-HexNAc+Hex1HexNAc2
	2319	1133.66	NISQVLEK	2-7-0-0-0	2319	2310	1236.53	1236.03	2	2470.05	26.82	1133.66	NISQVLEK	-	No	0	0.56	108.88	0.22	-3	TRUE	0.4	2-7-0-0-0	0-3-0-0-0	Hex-Hex-(Hex-)Hex-HexNAc-HexNAc+HexNAc3	Hex-(Hex-Hex-)Hex-HexNAc-HexNAc+HexNAc3
	2363	1128.72	LLNINPNK	3-5-0-0-0	2363	2354	1173.54	1173.03	2	2344.05	27.08	1128.72	LLNINPNK	-	No	1	0.77	123.7	7.69	-2	TRUE	3.33	3-5-0-0-0	1-1-0-0-0	Hex-Hex-(Hex-)Hex-HexNAc-HexNAc+Hex1HexNAc1	Hex-(Hex-Hex-)Hex-HexNAc-HexNAc+Hex1HexNAc1
	2366	1128.67	LLNINPNK	3-6-1-0-0	2366	2365	1327.59	1327.09	2	2652.16	27.1	1128.67	-	-	No	0	0.63	145.18	18.66	0	FALSE	-	2-4-0-0-0		Hex-Hex-(Hex-)Hex-HexNAc-HexNAc+Hex	Hex-(Hex-Hex-)Hex-HexNAc-HexNAc+Hex
	2370	661.19	VQPFNVTQGK	5-6-2-0-0	2370	2365	1133.82	1133.15	3	3396.42	27.12	558.927	-	-	No	1	0.65	6.96	275.15	-1	TRUE	-	6-6-2-0-0	1-0-0-0-0	Hex-(DeHex-)HexNAc-Hex-HexNAc-(Hex-)Hex-(HexNAc-Hex-)Hex-HexNAc-(DeHex-)HexNAc+Hex1	Hex-(DeHex-)HexNAc-Hex-HexNAc-Hex-(HexNAc-(Hex-)Hex-)Hex-HexNAc-(DeHex-)HexNAc+Hex1	Hex-(DeHex-)HexNAc-Hex-HexNAc-Hex-(Hex-HexNAc-Hex-)Hex-HexNAc-(DeHex-)HexNAc+Hex1	HexNAc-Hex-HexNAc-(Hex-)Hex-(Hex-(DeHex-)HexNAc-Hex-)Hex-HexNAc-(DeHex-)HexNAc+Hex1	Hex-HexNAc-Hex-HexNAc-Hex-(Hex-(DeHex-)HexNAc-Hex-)Hex-HexNAc-(DeHex-)HexNAc+Hex1	HexNAc-Hex-HexNAc-Hex-(Hex-(DeHex-)HexNAc-(Hex-)Hex-)Hex-HexNAc-(DeHex-)HexNAc+Hex1	Hex-HexNAc-(Hex-)Hex-(DeHex-HexNAc-(Hex-HexNAc-)Hex-)Hex-HexNAc-(DeHex-)HexNAc+Hex1	Hex-HexNAc-(Hex-Hex-)Hex-(DeHex-HexNAc-(HexNAc-)Hex-)Hex-HexNAc-(DeHex-)HexNAc+Hex1	Hex-Hex-(Hex-HexNAc-)Hex-(DeHex-HexNAc-(HexNAc-)Hex-)Hex-HexNAc-(DeHex-)HexNAc+Hex1	Hex-Hex-(HexNAc-)Hex-(DeHex-HexNAc-(Hex-HexNAc-)Hex-)Hex-HexNAc-(DeHex-)HexNAc+Hex1	Hex-(DeHex-)HexNAc-Hex-HexNAc-(Hex-HexNAc-)Hex-(Hex-)Hex-HexNAc-(DeHex-)HexNAc+Hex1	Hex-(DeHex-)HexNAc-Hex-HexNAc-(HexNAc-)Hex-(Hex-Hex-)Hex-HexNAc-(DeHex-)HexNAc+Hex1	Hex-HexNAc-Hex-HexNAc-(Hex-(DeHex-)HexNAc-)Hex-(Hex-)Hex-HexNAc-(DeHex-)HexNAc+Hex1	HexNAc-Hex-HexNAc-(Hex-(DeHex-)HexNAc-)Hex-(Hex-Hex-)Hex-HexNAc-(DeHex-)HexNAc+Hex1	Hex-HexNAc-(Hex-HexNAc-)Hex-(Hex-(DeHex-)HexNAc-Hex-)Hex-HexNAc-(DeHex-)HexNAc+Hex1	Hex-(DeHex-)HexNAc-(Hex-HexNAc-)Hex-(Hex-(HexNAc-)Hex-)Hex-HexNAc-(DeHex-)HexNAc+Hex1	Hex-(DeHex-)HexNAc-(HexNAc-)Hex-(Hex-Hex-(HexNAc-)Hex-)Hex-HexNAc-(DeHex-)HexNAc+Hex1	Hex-(DeHex-)HexNAc-(HexNAc-)Hex-(Hex-(Hex-HexNAc-)Hex-)Hex-HexNAc-(DeHex-)HexNAc+Hex1	Hex-HexNAc-(DeHex-HexNAc-)Hex-(Hex-Hex-(HexNAc-)Hex-)Hex-HexNAc-(DeHex-)HexNAc+Hex1	Hex-HexNAc-(DeHex-HexNAc-)Hex-(Hex-(Hex-HexNAc-)Hex-)Hex-HexNAc-(DeHex-)HexNAc+Hex1	Hex-Hex-Hex-(DeHex-HexNAc-)Hex-(HexNAc-(HexNAc-)Hex-)Hex-HexNAc-(DeHex-)HexNAc+Hex1	Hex-Hex-(DeHex-HexNAc-)Hex-(Hex-HexNAc-(HexNAc-)Hex-)Hex-HexNAc-(DeHex-)HexNAc+Hex1	Hex-Hex-(DeHex-HexNAc-)Hex-(HexNAc-(Hex-HexNAc-)Hex-)Hex-HexNAc-(DeHex-)HexNAc+Hex1	Hex-Hex-Hex-(HexNAc-)Hex-(DeHex-HexNAc-(HexNAc-)Hex-)Hex-HexNAc-(DeHex-)HexNAc+Hex1	Hex-HexNAc-(HexNAc-)Hex-(Hex-(DeHex-)HexNAc-(Hex-)Hex-)Hex-HexNAc-(DeHex-)HexNAc+Hex1
	2403	565.17	LLNINPNK	3-4-2-0-0	2403	2398	1238.57	1238.06	2	2474.11	27.31	1623.72	FDVNQLQNTTIK	-	No	0	0.9	3.34	0	0	TRUE	1.38	2-4-0-0-0	0-1-0-0-0	Hex-(Hex-)Hex-HexNAc-HexNAc+HexNAc1
	2407	896.82	DSVINLSESVEDGPK	3-4-0-0-0	2407	2398	949.408	949.408	3	2845.2	27.34	896.823	-	-	No	0	1	122.46	0.75	0	FALSE	-	2-4-0-0-0		Hex-(Hex-Hex-)Hex-HexNAc-HexNAc+Hex	Hex-Hex-(Hex-)Hex-HexNAc-HexNAc+Hex
	2427	1320.79	VQPFNVTQGK	3-6-0-0-0	2427	2420	1350.58	1350.08	2	2698.14	27.45	1320.79	-	-	No	1	0.63	135.99	0	0	FALSE	-	2-3-0-0-0		Hex-(Hex-)Hex-HexNAc-HexNAc+Hex
	2447	1128.68	LLNINPNK	3-5-1-0-0	2447	2442	1246.57	1246.06	2	2490.11	27.57	1128.68	LLNINPNK	-	No	1	0.82	154.18	10.67	-3	TRUE	1.86	3-5-1-0-0	1-1-1-0-0	Hex-Hex-(Hex-)Hex-HexNAc-HexNAc+Hex1HexNAc1DeHex1	Hex-(Hex-Hex-)Hex-HexNAc-HexNAc+Hex1HexNAc1DeHex1
	2462	661.08	VQPFNVTQGK	3-6-1-0-0	2462	2453	1423.62	1423.11	2	2844.21	27.65	672.291	NNHTASILDR	-	No	1	0.62	1.51	74.17	0	TRUE	2.23	6-3-0-0-0	1-0-0-0-0	HexNAc-(HexNAc-)Hex-(HexNAc-Hex-)Hex-HexNAc-HexNAc+Hex1	HexNAc-Hex-(HexNAc-(HexNAc-)Hex-)Hex-HexNAc-HexNAc+Hex1
	2467	661.221	VQPFNVTQGK	2-5-0-0-0	2467	2464	1168.02	1167.52	2	2333.02	27.68	661.221	VQPFNVTQGK	-	No	1	0.64	118.74	42.8	0	TRUE	2.51	2-5-0-0-0	0-1-0-0-0	Hex-Hex-(Hex-)Hex-HexNAc-HexNAc+HexNAc1	Hex-(Hex-Hex-)Hex-HexNAc-HexNAc+HexNAc1
	2522	1133.74	NISQVLEK	2-5-0-0-0	2522	2519	1073.98	1073.98	2	2145.95	27.99	1133.74	NISQVLEK	-	No	0	0.68	102.9	0.05	0	TRUE	1.37	2-5-0-0-0	0-1-0-0-0	Hex-Hex-(Hex-)Hex-HexNAc-HexNAc+HexNAc1	Hex-(Hex-Hex-)Hex-HexNAc-HexNAc+HexNAc1
	2553	1128.76	LLNINPNK	3-4-1-0-0	2553	2552	1165.54	1165.03	2	2328.05	28.17	1128.76	LLNINPNK	-	No	1	0.83	173.29	0.72	-2	TRUE	0.52	3-4-1-0-0	1-0-1-0-0	Hex-Hex-(Hex-)Hex-HexNAc-HexNAc+Hex1DeHex1	Hex-(Hex-Hex-)Hex-HexNAc-HexNAc+Hex1DeHex1
	2568	739.666	AAIPSALDTNSSK	2-6-0-0-0	2568	2563	885.385	885.05	3	2652.13	28.26	739.666	AAIPSALDTNSSK	-	No	1	0.74	230.67	52.91	0	TRUE	1.29	2-6-0-0-0	0-1-0-0-0	Hex-Hex-Hex-(Hex-)Hex-HexNAc-HexNAc+HexNAc1	Hex-Hex-(Hex-Hex-)Hex-HexNAc-HexNAc+HexNAc1
	2698	739.698	AAIPSALDTNSSK	2-5-0-0-0	2698	2695	831.37	831.035	3	2490.08	29.02	739.698	AAIPSALDTNSSK	-	No	1	0.73	134.11	3.55	0	TRUE	1.27	2-5-0-0-0	0-1-0-0-0	Hex-Hex-(Hex-)Hex-HexNAc-HexNAc+HexNAc1	Hex-(Hex-Hex-)Hex-HexNAc-HexNAc+HexNAc1
	2709	739.629	AAIPSALDTNSSK	2-5-0-0-0	2709	2706	1246.55	1246.05	2	2490.07	29.08	739.629	AAIPSALDTNSSK	-	No	1	0.58	56.32	8.17	0	TRUE	1.47	2-5-0-0-0	0-1-0-0-0	Hex-Hex-(Hex-)Hex-HexNAc-HexNAc+HexNAc1	Hex-(Hex-Hex-)Hex-HexNAc-HexNAc+HexNAc1
	2733	739.5	AAIPSALDTNSSK	3-4-1-0-0	2733	2728	1340.09	1339.59	2	2677.17	29.21	1477.85	AAIPSALDTNSSK	-	No	1	0.74	110.62	0	-2	TRUE	1.37	3-4-1-0-0	1-1-0-0-0	Hex-(Hex-)Hex-HexNAc-(DeHex-)HexNAc+Hex1HexNAc1
	2803	739.705	AAIPSALDTNSSK	2-3-1-0-0	2803	2794	1157.53	1157.03	2	2312.03	29.63	739.705	AAIPSALDTNSSK	-	No	1	0.59	116.63	0	0	TRUE	1.48	2-3-1-0-0	0-0-1-0-0	Hex-(Hex-)Hex-HexNAc-HexNAc+DeHex1
	2845	859.324	ILGDKVNNTAVIEK	2-8-0-0-0	2845	2838	1073.15	1072.82	3	3215.42	29.89	859.324	ILGDKVNNTAVIEK	-	No	1	0.79	262.73	156.26	0	TRUE	4.25	2-8-0-0-0	0-1-0-0-0	Hex-Hex-Hex-Hex-Hex-(Hex-)Hex-HexNAc-HexNAc+HexNAc1	Hex-Hex-Hex-Hex-(Hex-Hex-)Hex-HexNAc-HexNAc+HexNAc1	Hex-Hex-Hex-(Hex-Hex-Hex-)Hex-HexNAc-HexNAc+HexNAc1
	3301	961.87	INTTADEKDPTNPFR	2-9-0-0-0	3301	3300	1195.5	1195.16	3	3582.47	32.54	536.239	-	-	No	1	0.88	0.74	238.11	0	FALSE	-	3-12-0-0-0		Hex-Hex-Hex-Hex-Hex-Hex-Hex-(Hex-HexNAc-)Hex-(Hex-Hex-)Hex-HexNAc-HexNAc+Hex	Hex-Hex-Hex-Hex-Hex-(Hex-HexNAc-)Hex-(Hex-(Hex-Hex-)Hex-)Hex-HexNAc-HexNAc+Hex	Hex-Hex-Hex-Hex-Hex-Hex-(Hex-HexNAc-)Hex-(Hex-(Hex-)Hex-)Hex-HexNAc-HexNAc+Hex	Hex-Hex-Hex-Hex-Hex-Hex-Hex-(HexNAc-)Hex-(Hex-(Hex-)Hex-)Hex-HexNAc-HexNAc+Hex	Hex-Hex-Hex-Hex-Hex-Hex-Hex-Hex-(HexNAc-)Hex-(Hex-Hex-)Hex-HexNAc-HexNAc+Hex	Hex-Hex-Hex-Hex-Hex-Hex-(HexNAc-)Hex-(Hex-(Hex-Hex-)Hex-)Hex-HexNAc-HexNAc+Hex
	3334	1377.83	IVDVNLTSEGK/KVIDDTNITR	3-5-2-0-0	3334	3333	1444.13	1443.63	2	2885.24	32.73	1377.83	-	-	No	0	1	129.89	0	0	FALSE	-	2-3-0-0-0		Hex-(Hex-)Hex-HexNAc-HexNAc+Hex	Hex-(Hex-)Hex-HexNAc-(DeHex-)HexNAc+Hex
	3386	961.829	INTTADEKDPTNPFR	2-7-0-0-0	3386	3377	1087.47	1087.13	3	3258.37	33.03	961.829	INTTADEKDPTNPFR	-	No	1	0.8	164.4	31.95	0	TRUE	2.4	2-7-0-0-0	0-1-0-0-0	Hex-Hex-Hex-Hex-(Hex-)Hex-HexNAc-HexNAc+HexNAc1	Hex-Hex-Hex-(Hex-Hex-)Hex-HexNAc-HexNAc+HexNAc1	Hex-Hex-(Hex-Hex-Hex-)Hex-HexNAc-HexNAc+HexNAc1
	3393	961.815	INTTADEKDPTNPFR	2-8-0-0-0	3393	3388	1141.48	1141.15	3	3420.42	33.07	961.815	INTTADEKDPTNPFR	-	No	1	0.88	152.11	50	0	TRUE	1.21	2-8-0-0-0	0-1-0-0-0	Hex-Hex-Hex-Hex-Hex-(Hex-)Hex-HexNAc-HexNAc+HexNAc1	Hex-Hex-Hex-Hex-(Hex-Hex-)Hex-HexNAc-HexNAc+HexNAc1	Hex-Hex-Hex-(Hex-Hex-Hex-)Hex-HexNAc-HexNAc+HexNAc1
	3424	810.271	WGHNITEFQQR	2-8-0-0-0	3424	3421	1040.42	1040.09	3	3117.26	33.25	810.271	WGHNITEFQQR	-	No	1	0.89	257.98	152.57	0	TRUE	0.55	2-8-0-0-0	0-1-0-0-0	Hex-Hex-Hex-Hex-Hex-(Hex-)Hex-HexNAc-HexNAc+HexNAc1	Hex-Hex-Hex-Hex-(Hex-Hex-)Hex-HexNAc-HexNAc+HexNAc1	Hex-Hex-Hex-(Hex-Hex-Hex-)Hex-HexNAc-HexNAc+HexNAc1
	3437	805.723	GLNLTEDTYKPR	2-7-0-0-0	3437	3432	983.423	983.09	3	2946.25	33.33	805.723	GLNLTEDTYKPR	-	No	1	0.84	201.69	58.23	0	TRUE	1.74	2-7-0-0-0	0-1-0-0-0	Hex-Hex-Hex-Hex-(Hex-)Hex-HexNAc-HexNAc+HexNAc1	Hex-Hex-Hex-(Hex-Hex-)Hex-HexNAc-HexNAc+HexNAc1	Hex-Hex-(Hex-Hex-Hex-)Hex-HexNAc-HexNAc+HexNAc1
	3494	871.83	ADEGSLKNISIYTK	2-5-0-0-0	3494	3487	919.42	919.086	3	2754.24	33.65	871.83	ADEGSLKNISIYTK	-	No	1	0.78	138.41	2.54	0	TRUE	2.3	2-5-0-0-0	0-1-0-0-0	Hex-Hex-(Hex-)Hex-HexNAc-HexNAc+HexNAc1	Hex-(Hex-Hex-)Hex-HexNAc-HexNAc+HexNAc1
	3578	699.072	VFGSQNLTTVK	2-9-0-0-0	3578	3575	1530.16	1529.65	2	3057.29	34.16	699.072	VFGSQNLTTVK	-	No	1	0.77	32.43	17.23	0	TRUE	0.56	2-9-0-0-0	0-1-0-0-0	Hex-Hex-Hex-Hex-Hex-Hex-(Hex-)Hex-HexNAc-HexNAc+HexNAc1	Hex-Hex-Hex-Hex-Hex-(Hex-Hex-)Hex-HexNAc-HexNAc+HexNAc1	Hex-Hex-Hex-Hex-(Hex-Hex-Hex-)Hex-HexNAc-HexNAc+HexNAc1	Hex-Hex-Hex-(Hex-Hex-Hex-Hex-)Hex-HexNAc-HexNAc+HexNAc1
	3589	805.802	GLNLTEDTYKPR	2-3-1-0-0	3589	3586	816.042	815.709	3	2444.1	34.22	805.802	GLNLTEDTYKPR	-	No	0	0.87	201.47	0	0	TRUE	1.8	2-3-1-0-0	0-0-1-0-0	Hex-(Hex-)Hex-HexNAc-HexNAc+DeHex1
	3606	699.151	VFGSQNLTTVK	2-8-0-0-0	3606	3597	1449.12	1448.62	2	2895.23	34.31	699.151	VFGSQNLTTVK	-	No	1	0.88	50.38	24.88	0	TRUE	0.51	2-8-0-0-0	0-1-0-0-0	Hex-Hex-Hex-Hex-Hex-(Hex-)Hex-HexNAc-HexNAc+HexNAc1	Hex-Hex-Hex-Hex-(Hex-Hex-)Hex-HexNAc-HexNAc+HexNAc1	Hex-Hex-Hex-(Hex-Hex-Hex-)Hex-HexNAc-HexNAc+HexNAc1
	3615	1121.72	ANLTWSVK	2-5-0-0-0	3615	3608	1068.47	1067.97	2	2133.92	34.37	1121.72	ANLTWSVK	-	No	1	0.81	106	0.05	0	TRUE	0.46	2-5-0-0-0	0-1-0-0-0	Hex-Hex-(Hex-)Hex-HexNAc-HexNAc+HexNAc1	Hex-(Hex-Hex-)Hex-HexNAc-HexNAc+HexNAc1
	3637	794.265	WHPQNSTSIWK	2-6-0-0-0	3637	3630	921.73	921.39	3	2761.15	34.49	794.265	WHPQNSTSIWK	-	No	0	0.59	287.74	112.49	0	TRUE	0.35	2-6-0-0-0	0-1-0-0-0	Hex-Hex-Hex-(Hex-)Hex-HexNAc-HexNAc+HexNAc1	Hex-Hex-(Hex-Hex-)Hex-HexNAc-HexNAc+HexNAc1
	3655	699.18	VFGSQNLTTVK	2-7-0-0-0	3655	3652	1368.1	1367.6	2	2733.18	34.6	699.18	VFGSQNLTTVK	-	No	1	0.87	62.49	25.64	0	TRUE	0.98	2-7-0-0-0	0-1-0-0-0	Hex-Hex-Hex-Hex-(Hex-)Hex-HexNAc-HexNAc+HexNAc1	Hex-Hex-Hex-(Hex-Hex-)Hex-HexNAc-HexNAc+HexNAc1	Hex-Hex-(Hex-Hex-Hex-)Hex-HexNAc-HexNAc+HexNAc1
	3692	800.175	NVSCLWCNTNK	2-7-0-0-0	3692	3685	979.72	979.384	3	2935.13	34.8	800.175	NVSCLWCNTNK	-	No	1	0.8	183.6	39.96	-2	TRUE	2.25	2-7-0-0-0	0-2-0-0-0	Hex-Hex-Hex-(Hex-)Hex-HexNAc-HexNAc+HexNAc2	Hex-Hex-(Hex-Hex-)Hex-HexNAc-HexNAc+HexNAc2
	3701	699.139	VFGSQNLTTVK	2-6-0-0-0	3701	3696	1287.07	1286.57	2	2571.13	34.86	699.139	VFGSQNLTTVK	-	No	1	0.86	74.65	28.76	0	TRUE	1.8	2-6-0-0-0	0-1-0-0-0	Hex-Hex-Hex-(Hex-)Hex-HexNAc-HexNAc+HexNAc1	Hex-Hex-(Hex-Hex-)Hex-HexNAc-HexNAc+HexNAc1
	3705	739.677	AAIPSALDTNSSK	4-5-1-1-0	3705	3696	1112.47	1112.14	3	3333.4	34.88	739.677	AAIPSALDTNSSK	-	No	1	0.9	26.52	171.91	0	TRUE	3.08	4-5-1-1-0	1-0-0-0-0	NeuAc-Hex-HexNAc-Hex-(Hex-Hex-)Hex-HexNAc-(DeHex-)HexNAc+Hex1	NeuAc-Hex-HexNAc-(Hex-)Hex-(Hex-)Hex-HexNAc-(DeHex-)HexNAc+Hex1
	3760	531.994	IYIPLNK	2-9-0-0-0	3760	3751	1363.59	1363.08	2	2724.15	35.19	531.994	IYIPLNK	-	No	0	0.63	28.12	24.73	0	TRUE	2.33	2-9-0-0-0	0-1-0-0-0	Hex-Hex-Hex-Hex-Hex-Hex-(Hex-)Hex-HexNAc-HexNAc+HexNAc1	Hex-Hex-Hex-Hex-Hex-(Hex-Hex-)Hex-HexNAc-HexNAc+HexNAc1	Hex-Hex-Hex-Hex-(Hex-Hex-Hex-)Hex-HexNAc-HexNAc+HexNAc1	Hex-Hex-Hex-(Hex-Hex-Hex-Hex-)Hex-HexNAc-HexNAc+HexNAc1
	3793	739.677	AAIPSALDTNSSK	3-4-1-1-0	3793	3784	990.426	990.426	3	2968.26	35.38	739.677	AAIPSALDTNSSK	-	No	1	0.76	67.97	46.34	0	TRUE	0.66	3-4-1-1-0	0-0-0-1-0	Hex-Hex-(HexNAc-Hex-)Hex-HexNAc-(DeHex-)HexNAc+NeuAc1
	3818	658.832	SAEGTFFINK	2-8-0-0-0	3818	3817	1409.08	1408.57	2	2815.13	35.53	658.832	SAEGTFFINK	-	No	1	0.5	22.27	14.23	0	TRUE	0.26	2-8-0-0-0	0-1-0-0-0	Hex-Hex-Hex-Hex-Hex-(Hex-)Hex-HexNAc-HexNAc+HexNAc1	Hex-Hex-Hex-Hex-(Hex-Hex-)Hex-HexNAc-HexNAc+HexNAc1	Hex-Hex-Hex-(Hex-Hex-Hex-)Hex-HexNAc-HexNAc+HexNAc1
	3822	531.994	IYIPLNK	2-8-0-0-0	3822	3817	1282.56	1282.07	2	2562.12	35.55	531.994	IYIPLNK	-	No	0	0.73	36.69	23.85	0	TRUE	5.81	2-8-0-0-0	0-1-0-0-0	Hex-Hex-Hex-Hex-Hex-(Hex-)Hex-HexNAc-HexNAc+HexNAc1	Hex-Hex-Hex-Hex-(Hex-Hex-)Hex-HexNAc-HexNAc+HexNAc1	Hex-Hex-Hex-(Hex-Hex-Hex-)Hex-HexNAc-HexNAc+HexNAc1
	3855	800.204	NVSCLWCNTNK	2-5-0-0-0	3855	3850	1307.03	1306.52	2	2611.03	35.74	800.204	NVSCLWCNTNK	-	No	1	0.88	97.87	13.04	0	TRUE	0.56	2-5-0-0-0	0-1-0-0-0	Hex-Hex-(Hex-)Hex-HexNAc-HexNAc+HexNAc1	Hex-(Hex-Hex-)Hex-HexNAc-HexNAc+HexNAc1
	3866	800.143	NVSCLWCNTNK	2-5-0-0-0	3866	3861	871.349	871.349	3	2611.02	35.8	800.143	NVSCLWCNTNK	-	No	0	0.75	154.03	1.42	0	TRUE	2.81	2-5-0-0-0	0-1-0-0-0	Hex-Hex-(Hex-)Hex-HexNAc-HexNAc+HexNAc1	Hex-(Hex-Hex-)Hex-HexNAc-HexNAc+HexNAc1
	3875	659.171	SAEGTFFINK	2-7-0-0-0	3875	3872	1328.05	1327.55	2	2653.09	35.85	659.171	SAEGTFFINK	-	No	1	0.66	48.8	21.7	0	TRUE	1.66	2-7-0-0-0	0-1-0-0-0	Hex-Hex-Hex-Hex-(Hex-)Hex-HexNAc-HexNAc+HexNAc1	Hex-Hex-Hex-(Hex-Hex-)Hex-HexNAc-HexNAc+HexNAc1	Hex-Hex-(Hex-Hex-Hex-)Hex-HexNAc-HexNAc+HexNAc1
	3877	794.193	WHPQNSTSIWK	2-3-1-0-0	3877	3872	808.36	808.025	3	2421.05	35.86	794.193	WHPQNSTSIWK	-	No	0	0.94	210.72	0	0	TRUE	2.62	2-3-1-0-0	0-0-1-0-0	Hex-(Hex-)Hex-HexNAc-HexNAc+DeHex1
	3881	659.076	SAEGTFFINK	2-7-0-0-0	3881	3872	885.7	885.365	3	2653.07	35.88	659.076	SAEGTFFINK	-	No	1	0.97	96.61	81.97	0	TRUE	3.13	2-7-0-0-0	0-1-0-0-0	Hex-Hex-Hex-Hex-(Hex-)Hex-HexNAc-HexNAc+HexNAc1	Hex-Hex-Hex-(Hex-Hex-)Hex-HexNAc-HexNAc+HexNAc1	Hex-Hex-(Hex-Hex-Hex-)Hex-HexNAc-HexNAc+HexNAc1
	3903	739.554	AAIPSALDTNSSK	3-4-1-1-0	3903	3894	1485.64	1485.13	2	2968.26	36.01	739.554	AAIPSALDTNSSK	-	No	1	0.98	91.54	59.57	0	TRUE	0.82	3-4-1-1-0	0-0-0-1-0	HexNAc-Hex-(Hex-Hex-)Hex-HexNAc-(DeHex-)HexNAc+NeuAc1	Hex-HexNAc-Hex-(Hex-)Hex-HexNAc-(DeHex-)HexNAc+NeuAc1	HexNAc-(Hex-)Hex-(Hex-)Hex-HexNAc-(DeHex-)HexNAc+NeuAc1
	3974	659.175	SAEGTFFINK	2-6-0-0-0	3974	3971	1247.02	1246.52	2	2491.02	36.42	1316.76	SAEGTFFINK	-	No	1	0.66	103.22	0	-3	TRUE	5.19	2-6-0-0-0	0-3-0-0-0	Hex-(Hex-)Hex-HexNAc-HexNAc+HexNAc3
	3998	682.121	GHTLTLNFTR	2-7-0-0-0	3998	3993	1351.08	1350.57	2	2699.13	36.56	682.121	GHTLTLNFTR	-	No	1	0.93	95.5	82.32	0	TRUE	7.42	2-7-0-0-0	0-1-0-0-0	Hex-Hex-Hex-Hex-(Hex-)Hex-HexNAc-HexNAc+HexNAc1	Hex-Hex-Hex-(Hex-Hex-)Hex-HexNAc-HexNAc+HexNAc1	Hex-Hex-(Hex-Hex-Hex-)Hex-HexNAc-HexNAc+HexNAc1
	4049	682.207	GHTLTLNFTR	2-6-0-0-0	4049	4048	847.039	846.705	3	2537.09	36.87	682.207	GHTLTLNFTR	-	No	1	0.83	202	67.51	0	TRUE	0.19	2-6-0-0-0	0-1-0-0-0	Hex-Hex-Hex-(Hex-)Hex-HexNAc-HexNAc+HexNAc1	Hex-Hex-(Hex-Hex-)Hex-HexNAc-HexNAc+HexNAc1
	4071	682.067	GHTLTLNFTR	3-6-0-0-0	4071	4070	914.734	914.4	3	2740.18	36.99	682.067	GHTLTLNFTR	-	No	1	0.62	21.22	147	0	TRUE	1.51	3-6-0-0-0	1-0-0-0-0	Hex-Hex-Hex-Hex-(Hex-)Hex-HexNAc-HexNAc+Hex1	Hex-Hex-(Hex-Hex-Hex-)Hex-HexNAc-HexNAc+Hex1	Hex-Hex-Hex-(Hex-Hex-)Hex-HexNAc-HexNAc+Hex1
	4090	682.163	GHTLTLNFTR	2-6-0-0-0	4090	4081	1270.05	1269.55	2	2537.09	37.1	682.163	GHTLTLNFTR	-	No	1	0.92	100.94	67.56	0	TRUE	3.08	2-6-0-0-0	0-1-0-0-0	Hex-Hex-Hex-(Hex-)Hex-HexNAc-HexNAc+HexNAc1	Hex-Hex-(Hex-Hex-)Hex-HexNAc-HexNAc+HexNAc1
	4106	682.139	GHTLTLNFTR	3-5-0-0-0	4106	4103	861.043	860.378	3	2578.11	37.2	682.139	GHTLTLNFTR	-	No	0	0.65	30.71	82.08	0	TRUE	3.6	3-5-0-0-0	1-0-0-0-0	Hex-Hex-Hex-(Hex-)Hex-HexNAc-HexNAc+Hex1	Hex-Hex-(Hex-Hex-)Hex-HexNAc-HexNAc+Hex1
	4108	682.222	GHTLTLNFTR	2-7-0-0-0	4108	4103	901.058	900.722	3	2699.14	37.21	682.222	GHTLTLNFTR	-	No	0	0.53	315.73	170.22	0	TRUE	0.45	2-7-0-0-0	0-1-0-0-0	Hex-Hex-Hex-Hex-(Hex-)Hex-HexNAc-HexNAc+HexNAc1	Hex-Hex-Hex-(Hex-Hex-)Hex-HexNAc-HexNAc+HexNAc1	Hex-Hex-(Hex-Hex-Hex-)Hex-HexNAc-HexNAc+HexNAc1
	4165	682.157	GHTLTLNFTR	2-6-0-0-0	4165	4158	847.04	846.709	3	2537.11	37.55	682.157	GHTLTLNFTR	-	No	1	0.62	254.97	83.5	0	TRUE	4.43	2-6-0-0-0	0-1-0-0-0	Hex-Hex-Hex-(Hex-)Hex-HexNAc-HexNAc+HexNAc1	Hex-Hex-(Hex-Hex-)Hex-HexNAc-HexNAc+HexNAc1
	4176	682.052	GHTLTLNFTR	3-5-0-0-0	4176	4169	860.379	860.379	3	2578.11	37.61	682.052	GHTLTLNFTR	-	No	0	0.51	54.23	111.21	0	TRUE	2.46	3-5-0-0-0	1-0-0-0-0	Hex-Hex-(Hex-Hex-)Hex-HexNAc-HexNAc+Hex1	Hex-Hex-Hex-(Hex-)Hex-HexNAc-HexNAc+Hex1
	4181	682.222	GHTLTLNFTR	2-5-0-0-0	4181	4180	793.023	792.688	3	2375.04	37.64	682.222	GHTLTLNFTR	-	No	1	0.76	182.51	12.92	0	TRUE	1.13	2-5-0-0-0	0-1-0-0-0	Hex-Hex-(Hex-)Hex-HexNAc-HexNAc+HexNAc1	Hex-(Hex-Hex-)Hex-HexNAc-HexNAc+HexNAc1
	4205	682.153	GHTLTLNFTR	2-5-0-0-0	4205	4202	1189.03	1188.53	2	2375.05	37.77	682.153	GHTLTLNFTR	-	No	1	0.81	149.81	62.4	0	TRUE	2.16	2-5-0-0-0	0-1-0-0-0	Hex-Hex-(Hex-)Hex-HexNAc-HexNAc+HexNAc1	Hex-(Hex-Hex-)Hex-HexNAc-HexNAc+HexNAc1
	4330	682.169	GHTLTLNFTR	2-5-0-0-0	4330	4323	793.022	792.688	3	2375.04	38.51	682.169	GHTLTLNFTR	-	No	1	0.7	199.37	14.2	0	TRUE	1.23	2-5-0-0-0	0-1-0-0-0	Hex-Hex-(Hex-)Hex-HexNAc-HexNAc+HexNAc1	Hex-(Hex-Hex-)Hex-HexNAc-HexNAc+HexNAc1
	4431	805.758	GLNLTEDTYKPR	4-5-1-1-0	4431	4422	1156.5	1156.16	3	3465.46	39.09	805.758	GLNLTEDTYKPR	-	No	1	0.96	21.96	166.41	0	TRUE	0.63	4-5-1-1-0	0-0-0-1-0	HexNAc-(Hex-)Hex-(HexNAc-(Hex-)Hex-)Hex-HexNAc-(DeHex-)HexNAc+NeuAc1	HexNAc-(Hex-Hex-)Hex-(HexNAc-Hex-)Hex-HexNAc-(DeHex-)HexNAc+NeuAc1	Hex-(HexNAc-)Hex-(Hex-HexNAc-Hex-)Hex-HexNAc-(DeHex-)HexNAc+NeuAc1	Hex-(HexNAc-)Hex-(HexNAc-(Hex-)Hex-)Hex-HexNAc-(DeHex-)HexNAc+NeuAc1	Hex-(Hex-HexNAc-)Hex-(HexNAc-Hex-)Hex-HexNAc-(DeHex-)HexNAc+NeuAc1	HexNAc-(HexNAc-)Hex-(Hex-(Hex-)Hex-)Hex-HexNAc-(DeHex-)HexNAc+NeuAc1	HexNAc-(HexNAc-)Hex-(Hex-Hex-Hex-)Hex-HexNAc-(DeHex-)HexNAc+NeuAc1	HexNAc-(Hex-)Hex-(Hex-HexNAc-Hex-)Hex-HexNAc-(DeHex-)HexNAc+NeuAc1	Hex-HexNAc-(Hex-HexNAc-)Hex-(Hex-)Hex-HexNAc-(DeHex-)HexNAc+NeuAc1	Hex-HexNAc-(HexNAc-)Hex-(Hex-Hex-)Hex-HexNAc-(DeHex-)HexNAc+NeuAc1	Hex-HexNAc-Hex-(HexNAc-(Hex-)Hex-)Hex-HexNAc-(DeHex-)HexNAc+NeuAc1	Hex-HexNAc-Hex-(Hex-HexNAc-Hex-)Hex-HexNAc-(DeHex-)HexNAc+NeuAc1	HexNAc-(Hex-HexNAc-)Hex-(Hex-Hex-)Hex-HexNAc-(DeHex-)HexNAc+NeuAc1	Hex-HexNAc-Hex-HexNAc-Hex-(Hex-)Hex-HexNAc-(DeHex-)HexNAc+NeuAc1
	4537	1085.38	SQNDTVTPDVWYTSKPK	2-4-0-0-0	4537	4532	1007.78	1007.45	3	3019.33	39.72	1085.38	SQNDTVTPDVWYTSKPK	-	No	0	0.8	127.92	0	0	TRUE	2.75	2-4-0-0-0	0-1-0-0-0	Hex-(Hex-)Hex-HexNAc-HexNAc+HexNAc1
	4577	805.81	GLNLTEDTYKPR	3-4-1-1-0	4577	4576	1034.79	1034.45	3	3100.33	39.97	533.898	-	-	No	0	0.68	6.68	180.17	-1	TRUE	-	4-7-0-1-0	0-0-0-1-0	Hex-HexNAc-(Hex-Hex-)Hex-(HexNAc-(Hex-)Hex-)Hex-HexNAc-HexNAc+NeuAc1	Hex-HexNAc-(Hex-Hex-Hex-)Hex-(HexNAc-Hex-)Hex-HexNAc-HexNAc+NeuAc1	Hex-HexNAc-Hex-Hex-(Hex-HexNAc-)Hex-(Hex-)Hex-HexNAc-HexNAc+NeuAc1	HexNAc-Hex-HexNAc-(Hex-Hex-Hex-)Hex-(Hex-)Hex-HexNAc-HexNAc+NeuAc1	Hex-HexNAc-Hex-HexNAc-(Hex-Hex-)Hex-(Hex-)Hex-HexNAc-HexNAc+NeuAc1	Hex-HexNAc-(Hex-Hex-)Hex-(Hex-HexNAc-Hex-)Hex-HexNAc-HexNAc+NeuAc1	Hex-HexNAc-Hex-HexNAc-(Hex-)Hex-(Hex-Hex-)Hex-HexNAc-HexNAc+NeuAc1	Hex-Hex-Hex-(HexNAc-)Hex-(Hex-HexNAc-Hex-)Hex-HexNAc-HexNAc+NeuAc1	Hex-Hex-Hex-(HexNAc-)Hex-(HexNAc-(Hex-)Hex-)Hex-HexNAc-HexNAc+NeuAc1	Hex-HexNAc-Hex-Hex-Hex-(Hex-HexNAc-Hex-)Hex-HexNAc-HexNAc+NeuAc1	Hex-HexNAc-Hex-Hex-(Hex-)Hex-(HexNAc-Hex-)Hex-HexNAc-HexNAc+NeuAc1	Hex-Hex-(Hex-HexNAc-)Hex-(HexNAc-(Hex-)Hex-)Hex-HexNAc-HexNAc+NeuAc1	Hex-Hex-(Hex-HexNAc-)Hex-(Hex-HexNAc-Hex-)Hex-HexNAc-HexNAc+NeuAc1	Hex-HexNAc-Hex-Hex-(HexNAc-)Hex-(Hex-Hex-)Hex-HexNAc-HexNAc+NeuAc1	Hex-HexNAc-Hex-Hex-Hex-(HexNAc-(Hex-)Hex-)Hex-HexNAc-HexNAc+NeuAc1	HexNAc-Hex-Hex-Hex-(Hex-HexNAc-(Hex-)Hex-)Hex-HexNAc-HexNAc+NeuAc1	Hex-HexNAc-Hex-HexNAc-Hex-(Hex-(Hex-)Hex-)Hex-HexNAc-HexNAc+NeuAc1	HexNAc-Hex-HexNAc-Hex-(Hex-Hex-(Hex-)Hex-)Hex-HexNAc-HexNAc+NeuAc1	HexNAc-Hex-HexNAc-Hex-(Hex-(Hex-Hex-)Hex-)Hex-HexNAc-HexNAc+NeuAc1	Hex-HexNAc-Hex-HexNAc-Hex-(Hex-Hex-Hex-)Hex-HexNAc-HexNAc+NeuAc1	HexNAc-Hex-HexNAc-Hex-(Hex-Hex-Hex-Hex-)Hex-HexNAc-HexNAc+NeuAc1	HexNAc-Hex-Hex-Hex-(HexNAc-(Hex-Hex-)Hex-)Hex-HexNAc-HexNAc+NeuAc1
	4649	807.742	MSVCTDNVTDLR	2-5-0-0-0	4649	4642	1314.54	1314.04	2	2626.05	40.41	807.742	MSVCTDNVTDLR	-	No	1	0.78	65.09	10.89	0	TRUE	1.77	2-5-0-0-0	0-1-0-0-0	Hex-Hex-(Hex-)Hex-HexNAc-HexNAc+HexNAc1	Hex-(Hex-Hex-)Hex-HexNAc-HexNAc+HexNAc1
	5175	829.322	GNETIVNLIHSTR	2-5-0-0-0	5175	5170	891.079	890.744	3	2669.21	43.46	829.322	GNETIVNLIHSTR	-	No	1	0.74	141.19	0.59	0	TRUE	4.39	2-5-0-0-0	0-1-0-0-0	Hex-Hex-(Hex-)Hex-HexNAc-HexNAc+HexNAc1	Hex-(Hex-Hex-)Hex-HexNAc-HexNAc+HexNAc1
	5193	1070.34	LNQTEPVAGNYYPVNTR	2-3-1-0-0	5193	5192	992.452	992.115	3	2973.32	43.57	1070.34	LNQTEPVAGNYYPVNTR	-	No	1	0.75	134.15	0	0	TRUE	3.86	2-3-1-0-0	0-0-1-0-0	Hex-(Hex-)Hex-HexNAc-HexNAc+DeHex1
	5318	681.836	GHTLTLNFTR	3-5-0-1-0	5318	5313	957.749	957.413	3	2869.22	44.28	366.214	-	-	No	1	0.57	6.13	236.26	0	FALSE	-	3-8-2-0-0		Hex-(DeHex-)HexNAc-Hex-Hex-Hex-(Hex-Hex-Hex-)Hex-HexNAc-(DeHex-)HexNAc+Hex	DeHex-HexNAc-Hex-Hex-Hex-Hex-(Hex-)Hex-(Hex-)Hex-HexNAc-(DeHex-)HexNAc+Hex	Hex-Hex-Hex-Hex-(Hex-)Hex-(DeHex-HexNAc-Hex-)Hex-HexNAc-(DeHex-)HexNAc+Hex	Hex-Hex-Hex-Hex-Hex-(DeHex-HexNAc-(Hex-)Hex-)Hex-HexNAc-(DeHex-)HexNAc+Hex	Hex-Hex-Hex-Hex-Hex-(Hex-(DeHex-)HexNAc-Hex-)Hex-HexNAc-(DeHex-)HexNAc+Hex	DeHex-HexNAc-Hex-Hex-Hex-(Hex-Hex-Hex-Hex-)Hex-HexNAc-(DeHex-)HexNAc+Hex	DeHex-HexNAc-Hex-Hex-Hex-(Hex-Hex-(Hex-)Hex-)Hex-HexNAc-(DeHex-)HexNAc+Hex	Hex-(DeHex-)HexNAc-Hex-Hex-Hex-Hex-Hex-(Hex-)Hex-HexNAc-(DeHex-)HexNAc+Hex	DeHex-HexNAc-Hex-Hex-(Hex-)Hex-(Hex-Hex-Hex-)Hex-HexNAc-(DeHex-)HexNAc+Hex
	5327	1299.47	DCVLQCEEQNCSGGALNHFR	2-6-0-0-0	5327	5324	1258.84	1258.17	3	3771.48	44.33	670.836	-	-	No	1	0.78	5.22	130.31	0	FALSE	-	5-9-0-0-0		Hex-Hex-Hex-Hex-Hex-(Hex-HexNAc-)Hex-(HexNAc-(HexNAc-)Hex-)Hex-HexNAc-HexNAc+Hex	Hex-Hex-Hex-Hex-Hex-(HexNAc-)Hex-(HexNAc-(Hex-HexNAc-)Hex-)Hex-HexNAc-HexNAc+Hex	Hex-Hex-Hex-Hex-(Hex-HexNAc-)Hex-(Hex-HexNAc-(HexNAc-)Hex-)Hex-HexNAc-HexNAc+Hex	Hex-Hex-Hex-Hex-(Hex-HexNAc-)Hex-(HexNAc-(Hex-HexNAc-)Hex-)Hex-HexNAc-HexNAc+Hex	Hex-HexNAc-(Hex-Hex-Hex-)Hex-(Hex-HexNAc-(Hex-HexNAc-)Hex-)Hex-HexNAc-HexNAc+Hex	Hex-Hex-Hex-Hex-(HexNAc-)Hex-(Hex-HexNAc-(Hex-HexNAc-)Hex-)Hex-HexNAc-HexNAc+Hex	Hex-Hex-Hex-(Hex-HexNAc-)Hex-(Hex-HexNAc-(Hex-HexNAc-)Hex-)Hex-HexNAc-HexNAc+Hex	Hex-HexNAc-(Hex-HexNAc-)Hex-(Hex-Hex-Hex-Hex-(HexNAc-)Hex-)Hex-HexNAc-HexNAc+Hex	Hex-HexNAc-(Hex-HexNAc-)Hex-(Hex-Hex-Hex-(Hex-HexNAc-)Hex-)Hex-HexNAc-HexNAc+Hex	Hex-Hex-Hex-Hex-Hex-Hex-(HexNAc-)Hex-(HexNAc-(HexNAc-)Hex-)Hex-HexNAc-HexNAc+Hex	Hex-HexNAc-(Hex-HexNAc-)Hex-(Hex-HexNAc-(Hex-Hex-Hex-)Hex-)Hex-HexNAc-HexNAc+Hex	Hex-Hex-Hex-Hex-Hex-(HexNAc-)Hex-(Hex-HexNAc-(HexNAc-)Hex-)Hex-HexNAc-HexNAc+Hex
	5703	770.165	ANNSWFQSILR	2-3-1-0-0	5703	5698	1187.52	1187.52	2	2373.03	46.52	770.165	ANNSWFQSILR	-	No	0	0.68	112.63	0	0	TRUE	8.44	2-3-1-0-0	0-0-1-0-0	Hex-(Hex-)Hex-HexNAc-HexNAc+DeHex1
	5771	934.337	GELNTSIFSSRPIDK	2-6-0-0-0	5771	5764	1015.46	1014.79	3	3041.34	46.93	934.337	GELNTSIFSSRPIDK	-	No	1	0.83	171.92	17.46	0	TRUE	1.28	2-6-0-0-0	0-1-0-0-0	Hex-Hex-Hex-(Hex-)Hex-HexNAc-HexNAc+HexNAc1	Hex-Hex-(Hex-Hex-)Hex-HexNAc-HexNAc+HexNAc1
	5883	813.867	AGPNGTLFVADAYK	2-6-0-0-0	5883	5874	1402.1	1401.6	2	2801.19	47.59	813.867	AGPNGTLFVADAYK	-	No	1	0.87	74.46	39.94	0	TRUE	1.66	2-6-0-0-0	0-1-0-0-0	Hex-Hex-Hex-(Hex-)Hex-HexNAc-HexNAc+HexNAc1	Hex-Hex-(Hex-Hex-)Hex-HexNAc-HexNAc+HexNAc1
	5899	675.585	VINETWAWK	2-8-0-0-0	5899	5896	1425.6	1425.09	2	2848.17	47.69	675.585	VINETWAWK	-	No	1	0.71	44.07	20.75	0	TRUE	0.34	2-8-0-0-0	0-1-0-0-0	Hex-Hex-Hex-Hex-Hex-(Hex-)Hex-HexNAc-HexNAc+HexNAc1	Hex-Hex-Hex-Hex-(Hex-Hex-)Hex-HexNAc-HexNAc+HexNAc1	Hex-Hex-Hex-(Hex-Hex-Hex-)Hex-HexNAc-HexNAc+HexNAc1
	5921	675.342	VINETWAWK	2-7-0-0-0	5921	5918	1344.57	1344.07	2	2686.12	47.82	675.342	VINETWAWK	-	No	1	0.75	109.23	44.95	0	TRUE	0.64	2-7-0-0-0	0-1-0-0-0	Hex-Hex-Hex-Hex-(Hex-)Hex-HexNAc-HexNAc+HexNAc1	Hex-Hex-Hex-(Hex-Hex-)Hex-HexNAc-HexNAc+HexNAc1	Hex-Hex-(Hex-Hex-Hex-)Hex-HexNAc-HexNAc+HexNAc1
	5925	814.171	AGPNGTLFVADAYK	2-5-0-0-0	5925	5918	1320.58	1320.58	2	2639.14	47.84	814.171	AGPNGTLFVADAYK	-	No	1	0.83	83.26	14.37	0	TRUE	1.3	2-5-0-0-0	0-1-0-0-0	Hex-Hex-(Hex-)Hex-HexNAc-HexNAc+HexNAc1	Hex-(Hex-Hex-)Hex-HexNAc-HexNAc+HexNAc1
	6029	675.653	VINETWAWK	2-6-0-0-0	6029	6028	1263.55	1263.04	2	2524.07	48.45	1349.82	VINETWAWK	-	No	1	0.78	104.82	0	-3	TRUE	0.29	2-6-0-0-0	0-3-0-0-0	Hex-(Hex-)Hex-HexNAc-HexNAc+HexNAc3
	6290	829.3	GNETIVNLIHSTR	3-6-0-1-0	6290	6281	1110.15	1109.49	3	3325.44	49.96	829.3	GNETIVNLIHSTR	-	No	1	0.89	42.25	190.96	0	TRUE	3.67	3-6-0-1-0	0-0-0-1-0	HexNAc-Hex-Hex-(Hex-)Hex-(Hex-)Hex-HexNAc-HexNAc+NeuAc1	Hex-HexNAc-Hex-Hex-Hex-(Hex-)Hex-HexNAc-HexNAc+NeuAc1	Hex-Hex-Hex-(HexNAc-(Hex-)Hex-)Hex-HexNAc-HexNAc+NeuAc1	Hex-Hex-Hex-(Hex-HexNAc-Hex-)Hex-HexNAc-HexNAc+NeuAc1	Hex-Hex-(Hex-)Hex-(HexNAc-Hex-)Hex-HexNAc-HexNAc+NeuAc1
	6629	1150.96	TTLVDNNTWNNSHIALVGK	2-8-0-0-0	6629	6622	1267.9	1267.22	3	3798.64	51.93	1150.96	TTLVDNNTWNNSHIALVGK	-	No	1	0.78	137.04	23.19	0	TRUE	7.58	2-8-0-0-0	0-1-0-0-0	Hex-Hex-Hex-Hex-Hex-(Hex-)Hex-HexNAc-HexNAc+HexNAc1	Hex-Hex-Hex-Hex-(Hex-Hex-)Hex-HexNAc-HexNAc+HexNAc1	Hex-Hex-Hex-(Hex-Hex-Hex-)Hex-HexNAc-HexNAc+HexNAc1
	6656	1150.99	TTLVDNNTWNNSHIALVGK	2-9-0-0-0	6656	6655	1321.91	1321.24	3	3960.7	52.09	1150.99	-	-	No	1	0.86	131.36	25.67	0	FALSE	-	2-8-1-0-0		Hex-Hex-Hex-Hex-(Hex-Hex-Hex-)Hex-HexNAc-(DeHex-)HexNAc+Hex	Hex-Hex-Hex-Hex-Hex-Hex-(Hex-)Hex-HexNAc-(DeHex-)HexNAc+Hex	Hex-Hex-Hex-Hex-Hex-(Hex-Hex-)Hex-HexNAc-(DeHex-)HexNAc+Hex
	6662	730.85	DIYTFDGALNK	3-6-0-0-0	6662	6655	947.064	946.733	3	2837.18	52.12	568.262	-	-	No	1	0.73	29.76	219.76	-1	TRUE	-	3-8-0-0-0	1-0-0-0-0	Hex-Hex-Hex-(Hex-Hex-Hex-Hex-)Hex-HexNAc-HexNAc+Hex1	Hex-Hex-Hex-Hex-Hex-(Hex-Hex-)Hex-HexNAc-HexNAc+Hex1	Hex-Hex-Hex-Hex-Hex-Hex-(Hex-)Hex-HexNAc-HexNAc+Hex1	Hex-Hex-Hex-Hex-(Hex-Hex-Hex-)Hex-HexNAc-HexNAc+Hex1
	6777	730.708	DIYTFDGALNK	2-5-0-0-0	6777	6776	1237.53	1237.03	2	2472.03	52.79	730.708	DIYTFDGALNK	-	No	0	0.67	22.58	4.07	0	TRUE	0.2	2-5-0-0-0	0-1-0-0-0	Hex-Hex-(Hex-)Hex-HexNAc-HexNAc+HexNAc1	Hex-(Hex-Hex-)Hex-HexNAc-HexNAc+HexNAc1
	6790	730.717	DIYTFDGALNK	2-5-0-0-0	6790	6787	825.351	825.018	3	2472.03	52.87	730.717	DIYTFDGALNK	-	No	1	0.81	168.89	5.61	0	TRUE	1.48	2-5-0-0-0	0-1-0-0-0	Hex-Hex-(Hex-)Hex-HexNAc-HexNAc+HexNAc1	Hex-(Hex-Hex-)Hex-HexNAc-HexNAc+HexNAc1
	6805	889.326	GVFITNETGQPLIGK	2-4-0-0-0	6805	6798	1315.12	1314.62	2	2627.23	52.96	889.326	GVFITNETGQPLIGK	-	No	0	0.63	76.48	0	0	TRUE	2.79	2-4-0-0-0	0-1-0-0-0	Hex-(Hex-)Hex-HexNAc-HexNAc+HexNAc1
	6884	805.031	GLNLTEDTYKPR	5-6-1-3-0	6884	6875	1472.6	1471.93	3	4412.76	53.42	623.318	-	-	No	0	0.9	4.57	272.18	0	FALSE	-	5-6-1-2-0		Hex-HexNAc-(NeuAc-Hex-HexNAc-)Hex-(NeuAc-Hex-(DeHex-)HexNAc-Hex-)Hex-HexNAc-HexNAc+Hex	DeHex-HexNAc-(NeuAc-Hex-HexNAc-)Hex-(NeuAc-Hex-HexNAc-(Hex-)Hex-)Hex-HexNAc-HexNAc+Hex	NeuAc-Hex-HexNAc-(DeHex-HexNAc-)Hex-(NeuAc-Hex-HexNAc-(Hex-)Hex-)Hex-HexNAc-HexNAc+Hex	NeuAc-Hex-(DeHex-)HexNAc-(HexNAc-)Hex-(NeuAc-Hex-HexNAc-(Hex-)Hex-)Hex-HexNAc-HexNAc+Hex	NeuAc-Hex-HexNAc-Hex-HexNAc-Hex-(NeuAc-Hex-(DeHex-)HexNAc-Hex-)Hex-HexNAc-HexNAc+Hex	NeuAc-Hex-HexNAc-Hex-(DeHex-)HexNAc-Hex-(NeuAc-Hex-HexNAc-Hex-)Hex-HexNAc-HexNAc+Hex	NeuAc-Hex-HexNAc-(NeuAc-Hex-HexNAc-)Hex-(Hex-(DeHex-)HexNAc-Hex-)Hex-HexNAc-HexNAc+Hex	NeuAc-Hex-HexNAc-(Hex-HexNAc-)Hex-(NeuAc-Hex-(DeHex-)HexNAc-Hex-)Hex-HexNAc-HexNAc+Hex	NeuAc-Hex-HexNAc-(NeuAc-Hex-HexNAc-)Hex-(DeHex-HexNAc-(Hex-)Hex-)Hex-HexNAc-HexNAc+Hex	NeuAc-Hex-(DeHex-)HexNAc-(Hex-)Hex-(NeuAc-Hex-HexNAc-(HexNAc-)Hex-)Hex-HexNAc-HexNAc+Hex	NeuAc-Hex-(DeHex-)HexNAc-(NeuAc-Hex-HexNAc-)Hex-(Hex-(HexNAc-)Hex-)Hex-HexNAc-HexNAc+Hex	Hex-(DeHex-)HexNAc-(NeuAc-Hex-HexNAc-)Hex-(NeuAc-Hex-HexNAc-Hex-)Hex-HexNAc-HexNAc+Hex	NeuAc-Hex-(DeHex-)HexNAc-(Hex-HexNAc-)Hex-(NeuAc-Hex-HexNAc-Hex-)Hex-HexNAc-HexNAc+Hex	NeuAc-Hex-(DeHex-)HexNAc-(NeuAc-Hex-HexNAc-)Hex-(Hex-HexNAc-Hex-)Hex-HexNAc-HexNAc+Hex	NeuAc-Hex-HexNAc-Hex-(DeHex-)HexNAc-(NeuAc-Hex-HexNAc-)Hex-(Hex-)Hex-HexNAc-HexNAc+Hex	NeuAc-Hex-HexNAc-Hex-HexNAc-(NeuAc-Hex-(DeHex-)HexNAc-)Hex-(Hex-)Hex-HexNAc-HexNAc+Hex	NeuAc-Hex-(DeHex-)HexNAc-(NeuAc-Hex-HexNAc-)Hex-(HexNAc-(Hex-)Hex-)Hex-HexNAc-HexNAc+Hex
	6915	695.597	NNVITLNITGK	3-6-0-1-0	6915	6908	1530.68	1530.17	2	3058.34	53.6	695.597	NNVITLNITGK	-	No	1	0.51	30.15	24.68	0	TRUE	2.71	3-6-0-1-0	0-0-0-1-0	Hex-Hex-Hex-(Hex-HexNAc-Hex-)Hex-HexNAc-HexNAc+NeuAc1	Hex-Hex-Hex-(HexNAc-(Hex-)Hex-)Hex-HexNAc-HexNAc+NeuAc1	Hex-Hex-Hex-Hex-(HexNAc-Hex-)Hex-HexNAc-HexNAc+NeuAc1	Hex-Hex-(Hex-)Hex-(HexNAc-Hex-)Hex-HexNAc-HexNAc+NeuAc1	HexNAc-Hex-Hex-Hex-(Hex-Hex-)Hex-HexNAc-HexNAc+NeuAc1	Hex-HexNAc-Hex-Hex-Hex-(Hex-)Hex-HexNAc-HexNAc+NeuAc1	HexNAc-Hex-Hex-(Hex-)Hex-(Hex-)Hex-HexNAc-HexNAc+NeuAc1
	7181	1143.97	TNITLVCKPGDLESAPVLR	2-5-0-0-0	7181	7172	1100.86	1100.86	3	3299.55	55.19	1143.97	-	-	No	0	1	126.81	0.36	0	FALSE	-	2-4-1-0-0		Hex-Hex-(Hex-)Hex-HexNAc-(DeHex-)HexNAc+Hex	Hex-(Hex-Hex-)Hex-HexNAc-(DeHex-)HexNAc+Hex
	7393	995.41	EEEAIQLDGLNASQIR	2-7-0-0-0	7393	7392	1110.15	1109.48	3	3325.43	56.45	995.407	-	-	No	1	0.81	155.98	20.22	0	FALSE	-	2-6-0-0-0		Hex-Hex-(Hex-Hex-Hex-)Hex-HexNAc-HexNAc+Hex	Hex-Hex-Hex-Hex-(Hex-)Hex-HexNAc-HexNAc+Hex	Hex-Hex-Hex-(Hex-Hex-)Hex-HexNAc-HexNAc+Hex
	7448	995.308	EEEAIQLDGLNASQIR	2-6-0-0-0	7448	7447	1583.19	1582.7	2	3163.38	56.78	995.308	EEEAIQLDGLNASQIR	-	No	1	0.77	45.83	7.35	0	TRUE	2.93	2-6-0-0-0	0-1-0-0-0	Hex-Hex-Hex-(Hex-)Hex-HexNAc-HexNAc+HexNAc1	Hex-Hex-(Hex-Hex-)Hex-HexNAc-HexNAc+HexNAc1
	7485	995.381	EEEAIQLDGLNASQIR	2-3-1-0-0	7485	7480	942.434	942.097	3	2823.27	57	995.381	EEEAIQLDGLNASQIR	-	No	1	0.81	136.33	0	0	TRUE	0.52	2-3-1-0-0	0-0-1-0-0	Hex-(Hex-)Hex-HexNAc-HexNAc+DeHex1
	7496	817.221	VWNSTFIEDYR	2-8-0-0-0	7496	7491	1045.42	1044.76	3	3131.26	57.07	817.221	VWNSTFIEDYR	-	No	1	0.86	40.56	22.91	-2	TRUE	1.17	2-8-0-0-0	0-2-0-0-0	Hex-Hex-Hex-Hex-(Hex-)Hex-HexNAc-HexNAc+HexNAc2	Hex-Hex-Hex-(Hex-Hex-)Hex-HexNAc-HexNAc+HexNAc2	Hex-Hex-(Hex-Hex-Hex-)Hex-HexNAc-HexNAc+HexNAc2
	7498	817.146	VWNSTFIEDYR	2-9-0-0-0	7498	7491	1648.67	1647.66	2	3293.31	57.08	817.146	VWNSTFIEDYR	-	No	1	0.77	39.04	17.49	0	TRUE	1.63	2-9-0-0-0	0-1-0-0-0	Hex-Hex-Hex-Hex-Hex-Hex-(Hex-)Hex-HexNAc-HexNAc+HexNAc1	Hex-Hex-Hex-Hex-Hex-(Hex-Hex-)Hex-HexNAc-HexNAc+HexNAc1	Hex-Hex-Hex-Hex-(Hex-Hex-Hex-)Hex-HexNAc-HexNAc+HexNAc1	Hex-Hex-Hex-(Hex-Hex-Hex-Hex-)Hex-HexNAc-HexNAc+HexNAc1
	7503	995.34	EEEAIQLDGLNASQIR	2-5-0-0-0	7503	7502	1502.17	1501.66	2	3001.31	57.11	995.34	EEEAIQLDGLNASQIR	-	No	1	0.89	75.09	7.49	0	TRUE	2.6	2-5-0-0-0	0-1-0-0-0	Hex-Hex-(Hex-)Hex-HexNAc-HexNAc+HexNAc1	Hex-(Hex-Hex-)Hex-HexNAc-HexNAc+HexNAc1
	7507	817.165	VWNSTFIEDYR	2-8-0-0-0	7507	7502	1567.13	1566.63	2	3131.24	57.13	817.165	VWNSTFIEDYR	-	No	1	0.77	41.12	22.25	0	TRUE	2.42	2-8-0-0-0	0-1-0-0-0	Hex-Hex-Hex-Hex-Hex-(Hex-)Hex-HexNAc-HexNAc+HexNAc1	Hex-Hex-Hex-Hex-(Hex-Hex-)Hex-HexNAc-HexNAc+HexNAc1	Hex-Hex-Hex-(Hex-Hex-Hex-)Hex-HexNAc-HexNAc+HexNAc1
	7527	995.42	EEEAIQLDGLNASQIR	2-3-1-0-0	7527	7524	1413.14	1412.65	2	2823.28	57.26	893.831	-	-	No	1	0.68	56.36	112.45	0	FALSE	-	4-3-0-0-0		HexNAc-(HexNAc-)Hex-(Hex-)Hex-HexNAc-HexNAc+Hex	HexNAc-Hex-(HexNAc-Hex-)Hex-HexNAc-HexNAc+Hex
	7646	1364.56	LANDTLIYFTSDQGAHVEEVSSK	2-6-0-0-0	7646	7645	1302.24	1301.58	3	3901.71	57.98	1364.56	LANDTLIYFTSDQGAHVEEVSSK	-	No	1	0.82	122.42	2.66	0	TRUE	0.88	2-6-0-0-0	0-1-0-0-0	Hex-Hex-Hex-(Hex-)Hex-HexNAc-HexNAc+HexNAc1	Hex-Hex-(Hex-Hex-)Hex-HexNAc-HexNAc+HexNAc1
	7690	909.333	LANDTLIYFTSDQGAHVEEVSSK	2-5-0-0-0	7690	7689	1248.22	1247.56	3	3739.67	58.24	837.434	-	-	No	0	0.65	0.86	115.84	0	FALSE	-	4-7-0-0-0		Hex-HexNAc-(Hex-)Hex-(Hex-Hex-(HexNAc-)Hex-)Hex-HexNAc-HexNAc+Hex	Hex-Hex-(Hex-)Hex-(Hex-HexNAc-(HexNAc-)Hex-)Hex-HexNAc-HexNAc+Hex	Hex-Hex-Hex-Hex-(Hex-HexNAc-(HexNAc-)Hex-)Hex-HexNAc-HexNAc+Hex	Hex-HexNAc-(Hex-)Hex-(Hex-(Hex-HexNAc-)Hex-)Hex-HexNAc-HexNAc+Hex	Hex-Hex-(Hex-Hex-)Hex-(HexNAc-(HexNAc-)Hex-)Hex-HexNAc-HexNAc+Hex	Hex-Hex-Hex-(Hex-)Hex-(HexNAc-(HexNAc-)Hex-)Hex-HexNAc-HexNAc+Hex	Hex-HexNAc-(HexNAc-)Hex-(Hex-Hex-Hex-Hex-)Hex-HexNAc-HexNAc+Hex	Hex-HexNAc-(HexNAc-)Hex-(Hex-(Hex-Hex-)Hex-)Hex-HexNAc-HexNAc+Hex	Hex-Hex-(Hex-)Hex-(HexNAc-(Hex-HexNAc-)Hex-)Hex-HexNAc-HexNAc+Hex	Hex-HexNAc-(HexNAc-)Hex-(Hex-Hex-(Hex-)Hex-)Hex-HexNAc-HexNAc+Hex	Hex-HexNAc-(Hex-HexNAc-)Hex-(Hex-Hex-Hex-)Hex-HexNAc-HexNAc+Hex	Hex-Hex-Hex-Hex-Hex-(HexNAc-(HexNAc-)Hex-)Hex-HexNAc-HexNAc+Hex	Hex-HexNAc-(Hex-HexNAc-)Hex-(Hex-(Hex-)Hex-)Hex-HexNAc-HexNAc+Hex	Hex-Hex-Hex-Hex-(HexNAc-(Hex-HexNAc-)Hex-)Hex-HexNAc-HexNAc+Hex	Hex-HexNAc-(Hex-Hex-)Hex-(Hex-(HexNAc-)Hex-)Hex-HexNAc-HexNAc+Hex	Hex-Hex-(Hex-HexNAc-)Hex-(Hex-(HexNAc-)Hex-)Hex-HexNAc-HexNAc+Hex	Hex-Hex-Hex-(HexNAc-)Hex-(Hex-(HexNAc-)Hex-)Hex-HexNAc-HexNAc+Hex	Hex-Hex-(HexNAc-)Hex-(Hex-(Hex-HexNAc-)Hex-)Hex-HexNAc-HexNAc+Hex	Hex-Hex-(HexNAc-)Hex-(Hex-Hex-(HexNAc-)Hex-)Hex-HexNAc-HexNAc+Hex
	7696	888.796	TNSTFVQALVEHVK	2-8-0-0-0	7696	7689	1092.81	1092.49	3	3274.44	58.28	888.796	TNSTFVQALVEHVK	-	No	1	0.79	170.24	35.36	0	TRUE	6.11	2-8-0-0-0	0-1-0-0-0	Hex-Hex-Hex-Hex-Hex-(Hex-)Hex-HexNAc-HexNAc+HexNAc1	Hex-Hex-Hex-Hex-(Hex-Hex-)Hex-HexNAc-HexNAc+HexNAc1	Hex-Hex-Hex-(Hex-Hex-Hex-)Hex-HexNAc-HexNAc+HexNAc1
	7727	939.854	TQNFTLLVQGSPELK	5-6-0-0-0	7727	7722	1221.88	1221.54	3	3661.6	58.46	939.854	TQNFTLLVQGSPELK	-	No	1	0.97	28.5	179.48	0	TRUE	5.67	5-6-0-0-0	1-0-0-0-0	Hex-HexNAc-Hex-(HexNAc-(Hex-Hex-)Hex-)Hex-HexNAc-HexNAc+Hex1	HexNAc-(Hex-Hex-)Hex-(Hex-HexNAc-Hex-)Hex-HexNAc-HexNAc+Hex1	HexNAc-(Hex-)Hex-(Hex-HexNAc-(Hex-)Hex-)Hex-HexNAc-HexNAc+Hex1	HexNAc-(Hex-Hex-)Hex-(HexNAc-(Hex-)Hex-)Hex-HexNAc-HexNAc+Hex1	HexNAc-(Hex-)Hex-(HexNAc-(Hex-Hex-)Hex-)Hex-HexNAc-HexNAc+Hex1	Hex-HexNAc-Hex-(Hex-HexNAc-(Hex-)Hex-)Hex-HexNAc-HexNAc+Hex1
	7734	776.185	ALGFENATQALGR	3-4-1-1-0	7734	7733	1015.11	1014.77	3	3041.3	58.5	776.185	ALGFENATQALGR	-	No	0	0.55	46.44	30.47	0	TRUE	0.32	3-4-1-1-0	0-0-0-1-0	HexNAc-Hex-(Hex-Hex-)Hex-HexNAc-(DeHex-)HexNAc+NeuAc1	Hex-HexNAc-Hex-(Hex-)Hex-HexNAc-(DeHex-)HexNAc+NeuAc1	HexNAc-(Hex-)Hex-(Hex-)Hex-HexNAc-(DeHex-)HexNAc+NeuAc1
	7740	972.7	HNNDTQHIWESDSNEFSVIADPR	2-3-1-0-0	7740	7733	1250.54	1250.54	3	3748.6	58.54	1003.44	LSALDNLLNHSSMFLK	-	No	1	0.7	14.1	70.23	0	TRUE	10.23	4-7-0-0-0	1-0-0-0-0	Hex-Hex-(HexNAc-)Hex-(Hex-Hex-Hex-)Hex-HexNAc-HexNAc+Hex1	Hex-Hex-(HexNAc-)Hex-(Hex-(Hex-)Hex-)Hex-HexNAc-HexNAc+Hex1	Hex-Hex-(Hex-HexNAc-)Hex-(Hex-Hex-)Hex-HexNAc-HexNAc+Hex1	Hex-Hex-Hex-(HexNAc-)Hex-(Hex-Hex-)Hex-HexNAc-HexNAc+Hex1	Hex-HexNAc-(Hex-)Hex-(Hex-Hex-Hex-)Hex-HexNAc-HexNAc+Hex1	Hex-HexNAc-(Hex-)Hex-(Hex-(Hex-)Hex-)Hex-HexNAc-HexNAc+Hex1	Hex-HexNAc-(Hex-Hex-)Hex-(Hex-Hex-)Hex-HexNAc-HexNAc+Hex1	Hex-(Hex-Hex-)Hex-(Hex-HexNAc-Hex-)Hex-HexNAc-HexNAc+Hex1	Hex-(Hex-)Hex-(HexNAc-(Hex-Hex-)Hex-)Hex-HexNAc-HexNAc+Hex1	Hex-(Hex-)Hex-(Hex-HexNAc-(Hex-)Hex-)Hex-HexNAc-HexNAc+Hex1	Hex-(Hex-Hex-)Hex-(HexNAc-(Hex-)Hex-)Hex-HexNAc-HexNAc+Hex1	HexNAc-(Hex-Hex-)Hex-(Hex-(Hex-)Hex-)Hex-HexNAc-HexNAc+Hex1	HexNAc-(Hex-)Hex-(Hex-Hex-(Hex-)Hex-)Hex-HexNAc-HexNAc+Hex1	HexNAc-(Hex-Hex-)Hex-(Hex-Hex-Hex-)Hex-HexNAc-HexNAc+Hex1	Hex-HexNAc-Hex-(Hex-Hex-Hex-Hex-)Hex-HexNAc-HexNAc+Hex1	Hex-HexNAc-Hex-(Hex-(Hex-Hex-)Hex-)Hex-HexNAc-HexNAc+Hex1	Hex-HexNAc-Hex-(Hex-Hex-(Hex-)Hex-)Hex-HexNAc-HexNAc+Hex1	HexNAc-(Hex-)Hex-(Hex-Hex-Hex-Hex-)Hex-HexNAc-HexNAc+Hex1	HexNAc-(Hex-)Hex-(Hex-(Hex-Hex-)Hex-)Hex-HexNAc-HexNAc+Hex1
	7771	776.049	ALGFENATQALGR	3-4-1-1-0	7771	7766	1522.16	1521.65	2	3041.29	58.73	776.049	ALGFENATQALGR	-	No	1	0.93	81.39	60.06	0	TRUE	2.33	3-4-1-1-0	0-0-0-1-0	Hex-Hex-(HexNAc-Hex-)Hex-HexNAc-(DeHex-)HexNAc+NeuAc1
	7778	1364.63	LANDTLIYFTSDQGAHVEEVSSK	4-3-1-0-0	7888	7887	764.896	764.896	4	3055.55	59.45	898.301	-	-	No	0	1	125.69	0	0	FALSE	-	2-3-1-0-0		Hex-(Hex-)Hex-HexNAc-(DeHex-)HexNAc+Hex
	7890	961.39	FAEINGSALCSYNLKPSEYTTSPK	2-6-0-0-0	7890	7887	1353.27	1352.59	3	4054.74	59.46	1339.59	-	-	No	1	0.82	120.21	6	0	FALSE	-	3-5-0-0-0		Hex-HexNAc-(Hex-)Hex-(Hex-)Hex-HexNAc-HexNAc+Hex	HexNAc-Hex-(Hex-Hex-Hex-)Hex-HexNAc-HexNAc+Hex	HexNAc-Hex-(Hex-(Hex-)Hex-)Hex-HexNAc-HexNAc+Hex	Hex-HexNAc-Hex-(Hex-Hex-)Hex-HexNAc-HexNAc+Hex	HexNAc-(Hex-)Hex-(Hex-Hex-)Hex-HexNAc-HexNAc+Hex	HexNAc-(Hex-Hex-)Hex-(Hex-)Hex-HexNAc-HexNAc+Hex
	7954	888.9	TNSTFVQALVEHVK	2-3-1-0-0	7954	7953	871.413	871.081	3	2610.22	59.86	888.904	-	-	No	1	0.76	154.27	0	0	FALSE	-	2-3-0-0-0		Hex-(Hex-)Hex-HexNAc-HexNAc+Hex	Hex-(Hex-)Hex-HexNAc-(DeHex-)HexNAc+Hex
	8488	1317.59	IIISPEENVTLTCTAENQLER	2-5-0-0-0	8488	8481	1216.89	1216.56	3	3646.67	63.12	1135.09	-	-	No	0	1	106.8	2.61	0	FALSE	-	2-7-0-0-0		Hex-Hex-Hex-(Hex-Hex-Hex-)Hex-HexNAc-HexNAc+Hex	Hex-Hex-Hex-Hex-Hex-(Hex-)Hex-HexNAc-HexNAc+Hex	Hex-Hex-Hex-Hex-(Hex-Hex-)Hex-HexNAc-HexNAc+Hex
	8521	981.45	LLHALGGDDFLGMLNR	2-6-0-0-0	8521	8514	1046.8	1046.13	3	3135.36	63.32	636.27	-	-	No	0	0.89	100.77	34.46	-1	TRUE	-	3-9-0-0-0	0-1-0-0-0	Hex-Hex-Hex-Hex-Hex-(HexNAc-)Hex-(Hex-)Hex-HexNAc-HexNAc+HexNAc1	Hex-Hex-Hex-Hex-(Hex-HexNAc-)Hex-(Hex-)Hex-HexNAc-HexNAc+HexNAc1
	8970	888.829	GVFITNETGQPLIGK	4-4-1-1-0	8970	8965	1157.85	1157.85	3	3470.53	66.2	961.828	-	-	No	0	1	127.25	32.89	0	FALSE	-	4-5-0-0-0		HexNAc-(Hex-Hex-)Hex-(HexNAc-Hex-)Hex-HexNAc-HexNAc+Hex	Hex-HexNAc-Hex-(Hex-HexNAc-Hex-)Hex-HexNAc-HexNAc+Hex	Hex-HexNAc-Hex-(HexNAc-(Hex-)Hex-)Hex-HexNAc-HexNAc+Hex	Hex-HexNAc-(Hex-)Hex-(HexNAc-Hex-)Hex-HexNAc-HexNAc+Hex	HexNAc-Hex-HexNAc-Hex-(Hex-Hex-)Hex-HexNAc-HexNAc+Hex	Hex-HexNAc-Hex-HexNAc-Hex-(Hex-)Hex-HexNAc-HexNAc+Hex	HexNAc-Hex-HexNAc-(Hex-)Hex-(Hex-)Hex-HexNAc-HexNAc+Hex	Hex-HexNAc-(Hex-HexNAc-)Hex-(Hex-)Hex-HexNAc-HexNAc+Hex	HexNAc-(Hex-)Hex-(Hex-HexNAc-Hex-)Hex-HexNAc-HexNAc+Hex	HexNAc-(Hex-)Hex-(HexNAc-(Hex-)Hex-)Hex-HexNAc-HexNAc+Hex
	8981	939.691	TQNFTLLVQGSPELK	4-5-1-1-0	8981	8976	1245.88	1245.55	3	3733.61	66.27	939.691	TQNFTLLVQGSPELK	-	No	1	0.87	18.43	176.44	-2	TRUE	6.67	4-5-1-1-0	1-1-0-0-0	NeuAc-Hex-HexNAc-Hex-(Hex-)Hex-HexNAc-(DeHex-)HexNAc+Hex1HexNAc1
	9034	775.79	ALGFENATQALGR	4-5-1-2-0	9034	9031	1233.86	1233.52	3	3697.53	66.64	592.974	-	-	No	0	1	7.88	235.23	-2	TRUE	-	5-6-3-1-0	0-0-2-0-0	NeuAc-Hex-HexNAc-(HexNAc-Hex-Hex-)Hex-(DeHex-HexNAc-Hex-)Hex-HexNAc-HexNAc+DeHex2	NeuAc-Hex-HexNAc-(DeHex-HexNAc-)Hex-(HexNAc-Hex-Hex-Hex-)Hex-HexNAc-HexNAc+DeHex2	DeHex-HexNAc-(HexNAc-Hex-Hex-)Hex-(NeuAc-Hex-HexNAc-Hex-)Hex-HexNAc-HexNAc+DeHex2
	9043	939.84	TQNFTLLVQGSPELK	4-5-0-1-0	9043	9042	1197.19	1196.87	3	3587.58	66.71	939.84	TQNFTLLVQGSPELK	-	No	1	0.98	23.69	168.67	-2	TRUE	0.07	4-5-0-1-0	1-1-0-0-0	NeuAc-Hex-HexNAc-Hex-(Hex-)Hex-HexNAc-HexNAc+Hex1HexNAc1
	9282	938.369	GDQLILNLNNISSDR	4-5-1-1-0	9282	9273	1245.22	1244.54	3	3730.59	68.23	938.369	GDQLILNLNNISSDR	-	No	1	0.96	27.88	92.38	0	TRUE	4.84	4-5-1-1-0	0-0-0-1-0	Hex-HexNAc-Hex-(Hex-HexNAc-Hex-)Hex-HexNAc-(DeHex-)HexNAc+NeuAc1	HexNAc-Hex-HexNAc-Hex-(Hex-Hex-)Hex-HexNAc-(DeHex-)HexNAc+NeuAc1	Hex-HexNAc-Hex-HexNAc-Hex-(Hex-)Hex-HexNAc-(DeHex-)HexNAc+NeuAc1	HexNAc-Hex-HexNAc-(Hex-)Hex-(Hex-)Hex-HexNAc-(DeHex-)HexNAc+NeuAc1	Hex-HexNAc-(Hex-HexNAc-)Hex-(Hex-)Hex-HexNAc-(DeHex-)HexNAc+NeuAc1	HexNAc-(Hex-)Hex-(Hex-HexNAc-Hex-)Hex-HexNAc-(DeHex-)HexNAc+NeuAc1	HexNAc-(Hex-)Hex-(HexNAc-(Hex-)Hex-)Hex-HexNAc-(DeHex-)HexNAc+NeuAc1	Hex-HexNAc-Hex-(HexNAc-(Hex-)Hex-)Hex-HexNAc-(DeHex-)HexNAc+NeuAc1	HexNAc-(Hex-Hex-)Hex-(HexNAc-Hex-)Hex-HexNAc-(DeHex-)HexNAc+NeuAc1	Hex-HexNAc-(Hex-)Hex-(HexNAc-Hex-)Hex-HexNAc-(DeHex-)HexNAc+NeuAc1
	10083	935.337	DNATEEEILVYLEK	2-8-0-0-0	10083	10076	1123.81	1123.47	3	3367.38	73.73	935.337	DNATEEEILVYLEK	-	No	1	0.88	165.45	72.27	0	TRUE	7.61	2-8-0-0-0	0-1-0-0-0	Hex-Hex-Hex-(Hex-Hex-Hex-)Hex-HexNAc-HexNAc+HexNAc1	Hex-Hex-Hex-Hex-Hex-(Hex-)Hex-HexNAc-HexNAc+HexNAc1	Hex-Hex-Hex-Hex-(Hex-Hex-)Hex-HexNAc-HexNAc+HexNAc1
	10110	1011.86	LSALDNLLNHSSMFLK	2-8-0-0-0	10110	10109	1174.85	1174.52	3	3520.53	73.92	1011.86	-	-	No	0	0.9	186.95	58.68	-1	TRUE	-	2-8-0-0-0	0-1-0-0-0	Hex-Hex-Hex-Hex-Hex-(Hex-)Hex-HexNAc-HexNAc+HexNAc1	Hex-Hex-Hex-Hex-(Hex-Hex-)Hex-HexNAc-HexNAc+HexNAc1	Hex-Hex-Hex-(Hex-Hex-Hex-)Hex-HexNAc-HexNAc+HexNAc1
	10123	1011.87	LSALDNLLNHSSMFLK	2-7-0-0-0	10123	10120	1121.16	1120.5	3	3358.48	74.02	1011.87	-	-	No	0	0.95	164.78	49.82	-1	TRUE	-	2-7-0-0-0	0-1-0-0-0	Hex-Hex-Hex-Hex-(Hex-)Hex-HexNAc-HexNAc+HexNAc1	Hex-Hex-Hex-(Hex-Hex-)Hex-HexNAc-HexNAc+HexNAc1	Hex-Hex-(Hex-Hex-Hex-)Hex-HexNAc-HexNAc+HexNAc1
	10176	977.834	DYYPINESLASLPLR/LDMSQNVSLVTAELSK	2-6-0-0-0	10176	10175	1044.14	1043.8	3	3128.38	74.37	977.834	DYYPINESLASLPLR	-	No	1	0.85	218.63	30.19	0	TRUE	0.94	2-6-0-0-0	0-1-0-0-0	Hex-Hex-Hex-(Hex-)Hex-HexNAc-HexNAc+HexNAc1	Hex-Hex-(Hex-Hex-)Hex-HexNAc-HexNAc+HexNAc1
	10385	987.89	SLDAYPILNQAQALENHTEVQFQK	2-7-0-0-0	10385	10384	1075.74	1075.24	4	4296.91	75.77	704.703	-	-	No	1	0.64	2.68	311.81	0	FALSE	-	3-10-0-0-0		Hex-Hex-Hex-Hex-Hex-(Hex-HexNAc-)Hex-(Hex-Hex-)Hex-HexNAc-HexNAc+Hex	Hex-Hex-Hex-Hex-(HexNAc-)Hex-(Hex-(Hex-Hex-)Hex-)Hex-HexNAc-HexNAc+Hex	Hex-Hex-Hex-Hex-Hex-(HexNAc-)Hex-(Hex-(Hex-)Hex-)Hex-HexNAc-HexNAc+Hex	Hex-Hex-Hex-(Hex-HexNAc-)Hex-(Hex-(Hex-Hex-)Hex-)Hex-HexNAc-HexNAc+Hex	Hex-Hex-Hex-Hex-(Hex-HexNAc-)Hex-(Hex-(Hex-)Hex-)Hex-HexNAc-HexNAc+Hex	Hex-Hex-Hex-Hex-Hex-Hex-(HexNAc-)Hex-(Hex-Hex-)Hex-HexNAc-HexNAc+Hex
	11172	954.37	AINQTAVECTWTGPR	4-5-1-2-0	11172	11165	1352.56	1352.22	3	4053.64	81.82	710.819	-	-	No	0	1	4.3	206.23	-1	TRUE	-	4-8-1-2-0	0-0-0-1-0	NeuAc-Hex-(DeHex-)HexNAc-Hex-(Hex-HexNAc-Hex-Hex-(Hex-)Hex-)Hex-HexNAc-HexNAc+NeuAc1	NeuAc-Hex-(DeHex-)HexNAc-Hex-(HexNAc-Hex-Hex-(Hex-Hex-)Hex-)Hex-HexNAc-HexNAc+NeuAc1
	11601	973.401	LLHALGGDDFLGMLNR	5-6-0-2-0	11601	11594	1438.62	1437.94	3	4310.81	85.31	973.401	LLHALGGDDFLGMLNR	-	No	1	0.99	47	241.28	-2	TRUE	1.7	5-6-0-2-0	1-1-0-0-0	NeuAc-Hex-HexNAc-(NeuAc-Hex-HexNAc-)Hex-(Hex-)Hex-HexNAc-HexNAc+Hex1HexNAc1	NeuAc-Hex-HexNAc-Hex-(NeuAc-Hex-HexNAc-Hex-)Hex-HexNAc-HexNAc+Hex1HexNAc1
Sequence records with no mannuel verification					315	308	895.038	894.705	3	2681.09	15.05	640.073	KEDALNETR	-	No	1	0.51	54.6	5.25	-3	TRUE	10.75	4-4-1-0-0	2-0-1-0-0	Hex-Hex-(Hex-)Hex-HexNAc-HexNAc+Hex2DeHex1	Hex-(Hex-Hex-)Hex-HexNAc-HexNAc+Hex2DeHex1
					322	319	738.665	738.332	3	2211.97	15.09	440.721	VQPFNVTQGK	-	No	0	0.99	9.2	0	0	TRUE	8.5	3-3-0-0-0	1-0-0-0-0	Hex-(Hex-)Hex-HexNAc-HexNAc+Hex1
					390	385	825.67	825.67	3	2473.99	15.45	812.536	DCVSNGSLGCPVR	-	No	0	0.92	6.02	0	0	TRUE	4.84	2-4-0-0-0	0-1-0-0-0	Hex-(Hex-)Hex-HexNAc-HexNAc+HexNAc1
					392	385	716.312	715.979	3	2144.91	15.46	369.946	GASNLTWR	-	No	0	0.86	0.4	0	0	TRUE	0.23	3-3-1-0-0	1-0-0-0-0	Hex-(Hex-)Hex-HexNAc-(DeHex-)HexNAc+Hex1
					447	440	911.393	910.725	3	2729.15	15.76	858.867	AEPPLNASASDQGEK	-	No	0	0.97	1.98	0.15	0	TRUE	7.07	2-5-0-0-0	0-1-0-0-0	Hex-Hex-(Hex-)Hex-HexNAc-HexNAc+HexNAc1	Hex-(Hex-Hex-)Hex-HexNAc-HexNAc+HexNAc1
					518	517	802.017	801.683	3	2402.03	16.18	368.865	LNLTTDPK	-	No	0	0.99	13.61	0	-3	TRUE	9.15	5-3-0-0-0	3-0-0-0-0	Hex-(Hex-)Hex-HexNAc-HexNAc+Hex3
					658	649	1199.49	1198.98	2	2395.95	17	1018.68	DYYLNK	-	No	0	1	118.29	0.26	-3	TRUE	5.5	3-6-0-0-0	1-2-0-0-0	Hex-Hex-(Hex-)Hex-HexNAc-HexNAc+Hex1HexNAc2	Hex-(Hex-Hex-)Hex-HexNAc-HexNAc+Hex1HexNAc2
					705	704	657.302	656.97	3	1967.89	17.26	378.692	NISQVLEK	-	No	0	0.96	4	0	0	TRUE	5.64	2-3-1-0-0	0-0-1-0-0	Hex-(Hex-)Hex-HexNAc-HexNAc+DeHex1
					720	715	1463.08	1462.58	2	2923.15	17.35	713.126	DAGVVCTNETR	-	No	0	0.72	23.7	11.43	0	TRUE	5.26	2-8-0-0-0	0-1-0-0-0	Hex-Hex-Hex-Hex-Hex-(Hex-)Hex-HexNAc-HexNAc+HexNAc1	Hex-Hex-Hex-Hex-(Hex-Hex-)Hex-HexNAc-HexNAc+HexNAc1	Hex-Hex-Hex-(Hex-Hex-Hex-)Hex-HexNAc-HexNAc+HexNAc1
					832	825	985.78	985.78	3	2954.32	18.02	828.969	GNETIVNLIHSTR	-	No	0	0.72	16.93	27.06	0	TRUE	3.88	5-3-0-0-0	1-0-0-0-0	HexNAc-(HexNAc-)Hex-(Hex-)Hex-HexNAc-HexNAc+Hex1	HexNAc-Hex-(HexNAc-Hex-)Hex-HexNAc-HexNAc+Hex1
					889	880	732.288	731.958	3	2192.85	18.34	509.919	DYYLNK	-	No	0	0.93	6.03	1.89	0	TRUE	4.12	2-6-0-0-0	0-1-0-0-0	Hex-Hex-Hex-(Hex-)Hex-HexNAc-HexNAc+HexNAc1	Hex-Hex-(Hex-Hex-)Hex-HexNAc-HexNAc+HexNAc1
					1050	1045	1147.48	1147.48	3	3439.43	19.3	1120.47	DDAGNYTCIASNGPQGQIR	-	No	0	0.78	32.01	1.89	0	TRUE	3.83	3-4-1-0-0	0-1-0-0-0	DeHex-HexNAc-Hex-(Hex-)Hex-HexNAc-HexNAc+HexNAc1
					1206	1199	945.432	944.761	3	2831.26	20.22	828.969	GNETIVNLIHSTR	-	No	0	0.93	1.38	0.2	0	TRUE	4.57	2-6-0-0-0	0-1-0-0-0	Hex-Hex-Hex-(Hex-)Hex-HexNAc-HexNAc+HexNAc1	Hex-Hex-(Hex-Hex-)Hex-HexNAc-HexNAc+HexNAc1
					1235	1232	1447.1	1446.6	2	2891.18	20.39	859.291	AEPPLNASASDQGEK	-	No	1	0.72	54.61	20.39	0	TRUE	1.35	2-6-0-0-0	0-1-0-0-0	Hex-Hex-Hex-(Hex-)Hex-HexNAc-HexNAc+HexNAc1	Hex-Hex-(Hex-Hex-)Hex-HexNAc-HexNAc+HexNAc1
					1266	1265	1366.08	1365.57	2	2729.13	20.57	858.995	AEPPLNASASDQGEK	-	No	1	0.82	73.8	22.91	0	TRUE	0.27	2-5-0-0-0	0-1-0-0-0	Hex-Hex-(Hex-)Hex-HexNAc-HexNAc+HexNAc1	Hex-(Hex-Hex-)Hex-HexNAc-HexNAc+HexNAc1
					1424	1419	1277.05	1276.54	2	2551.07	21.52	859.29	AEPPLNASASDQGEK	-	No	1	0.91	228.13	0	0	TRUE	5.45	2-3-1-0-0	0-0-1-0-0	Hex-(Hex-)Hex-HexNAc-HexNAc+DeHex1
					1437	1430	1378.59	1378.09	2	2754.16	21.6	859.185	AEPPLNASASDQGEK	-	No	1	0.94	202.45	24.24	0	TRUE	0.62	3-3-1-0-0	0-0-1-0-0	HexNAc-Hex-(Hex-)Hex-HexNAc-HexNAc+DeHex1	Hex-(HexNAc-Hex-)Hex-HexNAc-HexNAc+DeHex1
					1477	1474	945.431	944.763	3	2831.27	21.83	828.969	GNETIVNLIHSTR	-	No	0	0.95	3.84	0.28	-2	TRUE	6.38	2-6-0-0-0	0-2-0-0-0	Hex-Hex-(Hex-)Hex-HexNAc-HexNAc+HexNAc2	Hex-(Hex-Hex-)Hex-HexNAc-HexNAc+HexNAc2
					1613	1606	1292.89	1292.55	3	3874.63	22.63	900.322	EAGNHTSGAGLVQINK	-	No	1	0.54	35.79	308.64	0	TRUE	2.08	5-6-2-0-0	1-0-0-0-0	Hex-(DeHex-)HexNAc-Hex-HexNAc-(Hex-)Hex-(Hex-)Hex-HexNAc-(DeHex-)HexNAc+Hex1	Hex-(DeHex-)HexNAc-Hex-HexNAc-Hex-(Hex-Hex-)Hex-HexNAc-(DeHex-)HexNAc+Hex1	Hex-(DeHex-)HexNAc-(Hex-)Hex-(Hex-(HexNAc-)Hex-)Hex-HexNAc-(DeHex-)HexNAc+Hex1	Hex-(DeHex-)HexNAc-Hex-(Hex-Hex-(HexNAc-)Hex-)Hex-HexNAc-(DeHex-)HexNAc+Hex1	Hex-(DeHex-)HexNAc-Hex-(Hex-(Hex-HexNAc-)Hex-)Hex-HexNAc-(DeHex-)HexNAc+Hex1
					1629	1628	1139.46	1139.12	3	3414.33	22.73	1100.18	NDAGSYECEIQNPASANR	-	No	0	0.74	15.69	3.61	0	TRUE	3.15	3-5-0-0-0	0-1-0-0-0	HexNAc-(Hex-)Hex-(Hex-)Hex-HexNAc-HexNAc+HexNAc1	Hex-HexNAc-Hex-(Hex-)Hex-HexNAc-HexNAc+HexNAc1	HexNAc-Hex-(Hex-Hex-)Hex-HexNAc-HexNAc+HexNAc1
					1736	1727	1054.11	1053.77	3	3158.3	23.37	810.063	WGHNITEFQQR	-	No	0	0.88	4.29	4.18	-2	TRUE	4.56	3-7-0-0-0	0-2-0-0-0	HexNAc-Hex-(Hex-Hex-Hex-)Hex-HexNAc-HexNAc+HexNAc2	HexNAc-Hex-(Hex-(Hex-)Hex-)Hex-HexNAc-HexNAc+HexNAc2	Hex-HexNAc-Hex-(Hex-Hex-)Hex-HexNAc-HexNAc+HexNAc2	HexNAc-(Hex-)Hex-(Hex-Hex-)Hex-HexNAc-HexNAc+HexNAc2	HexNAc-(Hex-Hex-)Hex-(Hex-)Hex-HexNAc-HexNAc+HexNAc2	Hex-HexNAc-(Hex-)Hex-(Hex-)Hex-HexNAc-HexNAc+HexNAc2
					1780	1771	1007.1	1006.77	3	3017.29	23.64	759.623	NAIKEGDNITLK	-	No	0	0.86	7.61	9.12	-2	TRUE	3.07	2-8-0-0-0	0-2-0-0-0	Hex-Hex-Hex-Hex-(Hex-)Hex-HexNAc-HexNAc+HexNAc2	Hex-Hex-Hex-(Hex-Hex-)Hex-HexNAc-HexNAc+HexNAc2	Hex-Hex-(Hex-Hex-Hex-)Hex-HexNAc-HexNAc+HexNAc2
					1791	1782	837.063	836.725	3	2507.15	23.7	828.969	GNETIVNLIHSTR	-	No	0	0.92	51.53	0	0	TRUE	3.12	2-4-0-0-0	0-1-0-0-0	Hex-(Hex-)Hex-HexNAc-HexNAc+HexNAc1
					1921	1914	1263.54	1263.04	2	2524.07	24.46	1308.66	ENATTDLLTK	-	No	0	0.86	1.91	0	-3	TRUE	0.77	3-5-0-0-0	1-2-0-0-0	Hex-(Hex-)Hex-HexNAc-HexNAc+Hex1HexNAc2
					1930	1925	1142.51	1142.01	2	2282	24.52	1041.73	NISIYTK	-	No	1	0.92	86.88	7.47	-2	TRUE	1.93	4-3-1-0-0	1-0-1-0-0	HexNAc-Hex-(Hex-)Hex-HexNAc-HexNAc+Hex1DeHex1	Hex-(HexNAc-Hex-)Hex-HexNAc-HexNAc+Hex1DeHex1
					1972	1969	1239.86	1239.53	3	3715.57	24.78	828.969	GNETIVNLIHSTR	-	No	0	0.71	4.02	111.58	0	TRUE	3.55	5-5-1-1-0	1-0-0-0-0	NeuAc-Hex-HexNAc-Hex-(Hex-HexNAc-Hex-)Hex-HexNAc-(DeHex-)HexNAc+Hex1	NeuAc-Hex-HexNAc-Hex-(HexNAc-(Hex-)Hex-)Hex-HexNAc-(DeHex-)HexNAc+Hex1	NeuAc-Hex-HexNAc-(HexNAc-)Hex-(Hex-Hex-)Hex-HexNAc-(DeHex-)HexNAc+Hex1	NeuAc-Hex-HexNAc-(Hex-HexNAc-)Hex-(Hex-)Hex-HexNAc-(DeHex-)HexNAc+Hex1	NeuAc-Hex-HexNAc-(Hex-)Hex-(HexNAc-Hex-)Hex-HexNAc-(DeHex-)HexNAc+Hex1
					2022	2013	979.413	979.087	3	2934.24	25.07	961.702	INTTADEKDPTNPFR	-	No	0	0.79	60.96	0.92	0	TRUE	5.08	2-5-0-0-0	0-1-0-0-0	Hex-Hex-(Hex-)Hex-HexNAc-HexNAc+HexNAc1	Hex-(Hex-Hex-)Hex-HexNAc-HexNAc+HexNAc1
					2033	2024	1191.51	1190.85	3	3569.53	25.14	828.969	GNETIVNLIHSTR	-	No	0	0.58	5.73	101.6	-2	TRUE	0.41	5-5-0-1-0	1-1-0-0-0	NeuAc-Hex-HexNAc-(HexNAc-)Hex-(Hex-)Hex-HexNAc-HexNAc+Hex1HexNAc1	NeuAc-Hex-HexNAc-Hex-(HexNAc-Hex-)Hex-HexNAc-HexNAc+Hex1HexNAc1
					2088	2079	948.655	948.402	4	3789.58	25.47	804.69	YHYNGTLLDGTLFDSSYSR	-	No	0	0.71	19.81	33.51	0	TRUE	3.61	3-6-0-0-0	1-0-0-0-0	Hex-Hex-Hex-Hex-(Hex-)Hex-HexNAc-HexNAc+Hex1	Hex-Hex-(Hex-Hex-Hex-)Hex-HexNAc-HexNAc+Hex1	Hex-Hex-Hex-(Hex-Hex-)Hex-HexNAc-HexNAc+Hex1
					2146	2145	652.546	652.296	4	2605.16	25.82	348.183	NNVITLNITGK	-	No	0	0.98	1.7	3.77	-2	TRUE	9.47	3-5-0-0-0	0-2-0-0-0	HexNAc-Hex-(Hex-)Hex-HexNAc-HexNAc+HexNAc2	Hex-(HexNAc-Hex-)Hex-HexNAc-HexNAc+HexNAc2
					2196	2189	1088.81	1088.47	3	3262.4	26.1	804.69	YHYNGTLLDGTLFDSSYSR	-	No	0	0.91	10.22	0	0	TRUE	7.48	2-4-0-0-0	0-1-0-0-0	Hex-(Hex-)Hex-HexNAc-HexNAc+HexNAc1
					2330	2321	788.677	788.343	3	2362.01	26.89	450.725	VINETWAWK	-	No	0	0.91	3.83	2.88	0	TRUE	3	2-5-0-0-0	0-1-0-0-0	Hex-Hex-(Hex-)Hex-HexNAc-HexNAc+HexNAc1	Hex-(Hex-Hex-)Hex-HexNAc-HexNAc+HexNAc1
					2390	2387	1155.51	1155.01	2	2308	27.24	1133.69	NISQVLEK	-	No	1	0.79	106.67	0.07	-2	TRUE	1.48	2-6-0-0-0	0-2-0-0-0	Hex-Hex-(Hex-)Hex-HexNAc-HexNAc+HexNAc2	Hex-(Hex-Hex-)Hex-HexNAc-HexNAc+HexNAc2
					2418	2409	944.399	944.399	4	3773.57	27.4	804.69	YHYNGTLLDGTLFDSSYSR	-	No	1	0.69	65.86	33.94	0	TRUE	0.39	3-5-1-0-0	1-0-0-0-0	Hex-Hex-Hex-(Hex-)Hex-HexNAc-(DeHex-)HexNAc+Hex1	Hex-Hex-(Hex-Hex-)Hex-HexNAc-(DeHex-)HexNAc+Hex1
					2423	2420	874.387	874.051	3	2619.13	27.43	454.74	GHTLTLNFTR	-	No	0	0.94	6.81	0	-3	TRUE	6.62	4-4-0-0-0	2-1-0-0-0	Hex-(Hex-)Hex-HexNAc-HexNAc+Hex2HexNAc1
					2451	2442	1038.79	1038.79	3	3113.34	27.59	633.404	LNLSENYTLSISNAR	-	No	0	0.85	8.17	11.79	0	TRUE	6.9	3-5-0-0-0	0-1-0-0-0	Hex-Hex-(HexNAc-Hex-)Hex-HexNAc-HexNAc+HexNAc1
					2456	2453	748.343	748.014	3	2241.02	27.62	695.664	KNITDLVEGAK	-	No	0	0.91	3.63	0	0	TRUE	3.92	2-4-0-0-0	0-1-0-0-0	Hex-(Hex-)Hex-HexNAc-HexNAc+HexNAc1
					2513	2508	778.681	778.681	3	2333.02	27.94	660.889	VQPFNVTQGK	-	No	0	0.85	25.49	1.29	0	TRUE	1.26	2-5-0-0-0	0-1-0-0-0	Hex-Hex-(Hex-)Hex-HexNAc-HexNAc+HexNAc1	Hex-(Hex-Hex-)Hex-HexNAc-HexNAc+HexNAc1
					2515	2508	906.055	905.718	3	2714.13	27.95	459.728	IVDVNLTSEGK	-	No	0	0.79	3.4	26.07	0	TRUE	9.27	2-7-0-0-0	0-1-0-0-0	Hex-Hex-Hex-Hex-(Hex-)Hex-HexNAc-HexNAc+HexNAc1	Hex-Hex-Hex-(Hex-Hex-)Hex-HexNAc-HexNAc+HexNAc1	Hex-Hex-(Hex-Hex-Hex-)Hex-HexNAc-HexNAc+HexNAc1
					2535	2530	1408.1	1408.1	2	2814.18	28.07	739.652	AAIPSALDTNSSK	-	No	1	0.66	27.1	13.43	0	TRUE	1.47	2-7-0-0-0	0-1-0-0-0	Hex-Hex-Hex-Hex-(Hex-)Hex-HexNAc-HexNAc+HexNAc1	Hex-Hex-Hex-(Hex-Hex-)Hex-HexNAc-HexNAc+HexNAc1	Hex-Hex-(Hex-Hex-Hex-)Hex-HexNAc-HexNAc+HexNAc1
					2676	2673	1083.99	1083.99	2	2165.97	28.89	1128.72	LLNINPNK	-	No	0	0.98	0.78	0	0	TRUE	9.69	3-3-1-0-0	1-0-0-0-0	Hex-(Hex-)Hex-HexNAc-(DeHex-)HexNAc+Hex1
					2731	2728	927.384	927.384	2	1852.75	29.2	1018.47	DYYLNK	-	No	0	0.95	3.98	0	0	TRUE	4.41	2-3-1-0-0	0-0-1-0-0	Hex-(Hex-)Hex-HexNAc-HexNAc+DeHex1
					2757	2750	1260.55	1260.04	2	2518.06	29.35	672.291	NNHTASILDR	-	No	0	0.84	31.87	25.69	0	TRUE	4.94	2-6-0-0-0	0-1-0-0-0	Hex-Hex-Hex-(Hex-)Hex-HexNAc-HexNAc+HexNAc1	Hex-Hex-(Hex-Hex-)Hex-HexNAc-HexNAc+HexNAc1
					2799	2794	1260.05	1260.05	2	2518.09	29.6	1626.02	AGPNGTLFVADAYK	-	No	0	0.72	25.07	0	0	TRUE	8.73	3-3-0-0-0	1-0-0-0-0	Hex-(Hex-)Hex-HexNAc-HexNAc+Hex1
					2821	2816	772.02	771.684	3	2312.03	29.74	739.764	AAIPSALDTNSSK	-	No	1	0.8	138.76	0	0	TRUE	0.21	2-3-1-0-0	0-0-1-0-0	Hex-(Hex-)Hex-HexNAc-HexNAc+DeHex1
					2922	2915	689.893	689.694	5	3443.43	30.35	454.74	DIVEYYNDSNGSHVLQGR	-	No	0	0.87	3.85	0	-3	TRUE	0.85	2-6-0-0-0	0-3-0-0-0	Hex-(Hex-)Hex-HexNAc-HexNAc+HexNAc3
					2973	2970	1132.98	1132.48	4	4525.88	30.64	1118.06	LDGPTEQCPDPLPLPAGNCTDEEGICHR	-	No	0	0.96	2.92	0	-3	TRUE	6.69	2-6-0-0-0	0-3-0-0-0	Hex-(Hex-)Hex-HexNAc-HexNAc+HexNAc3
					2977	2970	825.37	825.035	3	2472.08	30.66	459.728	IVDVNLTSEGK	-	No	0	1	1.59	1.05	0	TRUE	8.39	4-3-0-0-0	1-0-0-0-0	HexNAc-Hex-(Hex-)Hex-HexNAc-HexNAc+Hex1	Hex-(HexNAc-Hex-)Hex-HexNAc-HexNAc+Hex1
					3109	3102	1388.59	1387.94	3	4160.79	31.44	1116.44	VASVININPNTTHSTGSCR	-	No	1	0.97	22.79	161.9	0	TRUE	7.16	5-6-1-0-0	1-0-0-0-0	Hex-HexNAc-(Hex-HexNAc-)Hex-(Hex-Hex-)Hex-HexNAc-(DeHex-)HexNAc+Hex1	Hex-HexNAc-(HexNAc-)Hex-(Hex-(Hex-)Hex-)Hex-HexNAc-(DeHex-)HexNAc+Hex1	Hex-HexNAc-(HexNAc-)Hex-(Hex-Hex-Hex-)Hex-HexNAc-(DeHex-)HexNAc+Hex1	Hex-HexNAc-Hex-(Hex-HexNAc-(Hex-)Hex-)Hex-HexNAc-(DeHex-)HexNAc+Hex1	Hex-HexNAc-Hex-(HexNAc-(Hex-Hex-)Hex-)Hex-HexNAc-(DeHex-)HexNAc+Hex1	HexNAc-(Hex-HexNAc-)Hex-(Hex-(Hex-)Hex-)Hex-HexNAc-(DeHex-)HexNAc+Hex1	HexNAc-(HexNAc-)Hex-(Hex-Hex-(Hex-)Hex-)Hex-HexNAc-(DeHex-)HexNAc+Hex1	HexNAc-(HexNAc-)Hex-(Hex-(Hex-Hex-)Hex-)Hex-HexNAc-(DeHex-)HexNAc+Hex1	HexNAc-(Hex-HexNAc-)Hex-(Hex-Hex-Hex-)Hex-HexNAc-(DeHex-)HexNAc+Hex1	HexNAc-(HexNAc-)Hex-(Hex-Hex-Hex-Hex-)Hex-HexNAc-(DeHex-)HexNAc+Hex1	Hex-(Hex-HexNAc-)Hex-(HexNAc-(Hex-)Hex-)Hex-HexNAc-(DeHex-)HexNAc+Hex1	Hex-(HexNAc-)Hex-(Hex-HexNAc-(Hex-)Hex-)Hex-HexNAc-(DeHex-)HexNAc+Hex1	Hex-(HexNAc-)Hex-(HexNAc-(Hex-Hex-)Hex-)Hex-HexNAc-(DeHex-)HexNAc+Hex1	Hex-(Hex-HexNAc-)Hex-(Hex-HexNAc-Hex-)Hex-HexNAc-(DeHex-)HexNAc+Hex1	HexNAc-(Hex-Hex-)Hex-(Hex-HexNAc-Hex-)Hex-HexNAc-(DeHex-)HexNAc+Hex1	HexNAc-(Hex-)Hex-(HexNAc-(Hex-Hex-)Hex-)Hex-HexNAc-(DeHex-)HexNAc+Hex1	HexNAc-(Hex-)Hex-(Hex-HexNAc-(Hex-)Hex-)Hex-HexNAc-(DeHex-)HexNAc+Hex1	HexNAc-(Hex-Hex-)Hex-(HexNAc-(Hex-)Hex-)Hex-HexNAc-(DeHex-)HexNAc+Hex1
					3144	3135	1005.42	1005.08	3	3012.21	31.64	878.685	YEQGTGCWQGPNR	-	No	0	0.73	59.36	9.15	0	TRUE	6.97	4-4-0-0-0	1-0-0-0-0	HexNAc-(Hex-)Hex-(Hex-)Hex-HexNAc-HexNAc+Hex1	Hex-HexNAc-Hex-(Hex-)Hex-HexNAc-HexNAc+Hex1	HexNAc-Hex-(Hex-Hex-)Hex-HexNAc-HexNAc+Hex1
					3160	3157	1336.57	1335.9	3	4004.67	31.74	1475.77	DVGSCPNSQVFLYNLTTCQQTCR	-	No	0	0.85	9.49	0.56	0	TRUE	2.62	3-4-0-0-0	1-0-0-0-0	Hex-Hex-(Hex-)Hex-HexNAc-HexNAc+Hex1	Hex-(Hex-Hex-)Hex-HexNAc-HexNAc+Hex1
					3215	3212	1282.55	1281.88	3	3842.61	32.05	1476.09	DVGSCPNSQVFLYNLTTCQQTCR	-	No	1	0.5	46.78	0	0	TRUE	3.49	3-3-0-0-0	1-0-0-0-0	Hex-(Hex-)Hex-HexNAc-HexNAc+Hex1
					3219	3212	1136.15	1135.14	3	3402.41	32.07	1114.43	SSCGKENTSDPSLVIAFGR	-	No	0	0.95	4.48	0.5	0	TRUE	8.83	2-6-0-0-0	0-1-0-0-0	Hex-Hex-Hex-(Hex-)Hex-HexNAc-HexNAc+HexNAc1	Hex-Hex-(Hex-Hex-)Hex-HexNAc-HexNAc+HexNAc1
					3246	3245	760.09	759.836	4	3035.31	32.23	599.018	NLTVCPDGALFEQK	-	No	0	0.9	4.47	0.71	0	TRUE	1.77	4-3-1-0-0	1-0-0-0-0	HexNAc-Hex-(Hex-)Hex-HexNAc-(DeHex-)HexNAc+Hex1	Hex-(HexNAc-Hex-)Hex-HexNAc-(DeHex-)HexNAc+Hex1
					3252	3245	1013.12	1012.78	3	3035.32	32.26	599.018	NLTVCPDGALFEQK	-	No	0	0.9	6.23	18.16	0	TRUE	4.58	4-3-1-0-0	1-0-0-0-0	HexNAc-Hex-(Hex-)Hex-HexNAc-(DeHex-)HexNAc+Hex1	Hex-(HexNAc-Hex-)Hex-HexNAc-(DeHex-)HexNAc+Hex1
					3285	3278	946.139	945.633	4	3778.5	32.45	657.336	DTCTQECSYFNITK	-	No	0	0.83	3.67	45.25	0	TRUE	7.88	6-4-1-0-0	0-0-1-0-0	HexNAc-(HexNAc-)Hex-(HexNAc-(Hex-HexNAc-)Hex-)Hex-HexNAc-HexNAc+DeHex1	HexNAc-(Hex-HexNAc-)Hex-(HexNAc-(HexNAc-)Hex-)Hex-HexNAc-HexNAc+DeHex1	Hex-HexNAc-(HexNAc-)Hex-(HexNAc-(HexNAc-)Hex-)Hex-HexNAc-HexNAc+DeHex1	HexNAc-(HexNAc-)Hex-(Hex-HexNAc-(HexNAc-)Hex-)Hex-HexNAc-HexNAc+DeHex1
					3320	3311	1069.78	1069.45	3	3205.32	32.65	1178.41	RNDAGSYECEIQNPASANR	-	No	1	0.74	107.41	0	0	TRUE	1.83	2-4-0-0-0	0-1-0-0-0	Hex-(Hex-)Hex-HexNAc-HexNAc+HexNAc1
					3378	3377	700.035	699.278	4	2793.08	32.98	439.879	YEQGTGCWQGPNR	-	No	0	0.97	6.68	10.53	0	TRUE	10.84	3-3-1-0-0	0-0-1-0-0	HexNAc-Hex-(Hex-)Hex-HexNAc-HexNAc+DeHex1	Hex-(HexNAc-Hex-)Hex-HexNAc-HexNAc+DeHex1
					3382	3377	813.692	813.692	3	2438.05	33	672.291	NNHTASILDR	-	No	0	0.92	3.16	0.33	0	TRUE	3.81	4-3-0-0-0	1-0-0-0-0	HexNAc-Hex-(Hex-)Hex-HexNAc-HexNAc+Hex1	Hex-(HexNAc-Hex-)Hex-HexNAc-HexNAc+Hex1
					3402	3399	961.745	961.413	3	2881.22	33.12	935.213	DNATEEEILVYLEK	-	No	0	0.84	4.97	0.38	0	TRUE	9.49	2-5-0-0-0	0-1-0-0-0	Hex-Hex-(Hex-)Hex-HexNAc-HexNAc+HexNAc1	Hex-(Hex-Hex-)Hex-HexNAc-HexNAc+HexNAc1
					3428	3421	823.026	822.695	3	2465.06	33.27	714.015	FANEYPNITR	-	No	0	0.78	13.54	1	0	TRUE	5.45	3-3-1-0-0	0-0-1-0-0	HexNAc-Hex-(Hex-)Hex-HexNAc-HexNAc+DeHex1	Hex-(HexNAc-Hex-)Hex-HexNAc-HexNAc+DeHex1
					3503	3498	938.194	937.44	4	3745.73	33.71	903.713	AHCVWLECPIPDAPVVTNVTVK	-	No	1	0.84	35.84	1.13	0	TRUE	2.35	3-3-1-0-0	0-0-1-0-0	HexNAc-Hex-(Hex-)Hex-HexNAc-HexNAc+DeHex1	Hex-(HexNAc-Hex-)Hex-HexNAc-HexNAc+DeHex1
					3514	3509	1356.23	1355.89	3	4064.66	33.77	1120.5	DDAGNYTCIASNGPQGQIR	-	No	0	0.74	10.77	105.84	0	TRUE	0.6	6-5-0-0-0	1-0-0-0-0	Hex-HexNAc-Hex-(HexNAc-(Hex-HexNAc-)Hex-)Hex-HexNAc-HexNAc+Hex1	Hex-HexNAc-Hex-HexNAc-Hex-(HexNAc-Hex-)Hex-HexNAc-HexNAc+Hex1	HexNAc-(Hex-Hex-)Hex-(HexNAc-(HexNAc-)Hex-)Hex-HexNAc-HexNAc+Hex1	HexNAc-(Hex-)Hex-(HexNAc-(Hex-HexNAc-)Hex-)Hex-HexNAc-HexNAc+Hex1	HexNAc-(Hex-HexNAc-)Hex-(Hex-(HexNAc-)Hex-)Hex-HexNAc-HexNAc+Hex1	Hex-HexNAc-Hex-HexNAc-(HexNAc-)Hex-(Hex-)Hex-HexNAc-HexNAc+Hex1	HexNAc-(HexNAc-)Hex-(Hex-(Hex-HexNAc-)Hex-)Hex-HexNAc-HexNAc+Hex1
					3562	3553	1074.78	1074.12	3	3219.33	34.05	1062.98	GVLMVGNETTYEDGHGSR	-	No	0	0.66	2.85	100	0	TRUE	5.76	4-3-0-0-0	1-0-0-0-0	HexNAc-Hex-(Hex-)Hex-HexNAc-HexNAc+Hex1	Hex-(HexNAc-Hex-)Hex-HexNAc-HexNAc+Hex1
					3602	3597	902.117	901.782	3	2702.32	34.29	623.34	RPPLAELAALNLSGSR	-	No	0	0.88	22.22	0	0	TRUE	2.35	2-3-1-0-0	0-0-1-0-0	Hex-(Hex-)Hex-HexNAc-HexNAc+DeHex1
					3613	3608	883.405	883.405	3	2647.19	34.36	805.645	GLNLTEDTYKPR	-	No	0	0.87	14.54	0.38	0	TRUE	4.89	3-3-1-0-0	0-0-1-0-0	HexNAc-Hex-(Hex-)Hex-HexNAc-HexNAc+DeHex1	Hex-(HexNAc-Hex-)Hex-HexNAc-HexNAc+DeHex1
					3626	3619	1234.52	1233.87	3	3698.58	34.43	841.874	DIECQAESFPNWTLAQVGQK	-	No	0	0.65	23.54	14.6	0	TRUE	3.56	2-6-0-0-0	0-1-0-0-0	Hex-Hex-Hex-(Hex-)Hex-HexNAc-HexNAc+HexNAc1	Hex-Hex-(Hex-Hex-)Hex-HexNAc-HexNAc+HexNAc1
					3648	3641	966.754	966.084	3	2895.23	34.55	699.155	VFGSQNLTTVK	-	No	1	0.99	156.15	182.34	0	TRUE	0.42	2-8-0-0-0	0-1-0-0-0	Hex-Hex-Hex-Hex-Hex-(Hex-)Hex-HexNAc-HexNAc+HexNAc1	Hex-Hex-Hex-Hex-(Hex-Hex-)Hex-HexNAc-HexNAc+HexNAc1	Hex-Hex-Hex-(Hex-Hex-Hex-)Hex-HexNAc-HexNAc+HexNAc1
					3677	3674	810.715	810.385	3	2428.13	34.72	526.507	LVQLFPNDTSLK	-	No	0	0.9	13	0	0	TRUE	0.5	2-4-0-0-0	0-1-0-0-0	Hex-(Hex-)Hex-HexNAc-HexNAc+HexNAc1
					3694	3685	1123.46	1123.13	3	3366.36	34.81	669.044	TAVNCSSDFDACLITK	-	No	0	0.85	0.87	11.61	0	TRUE	0.22	3-5-1-0-0	1-0-0-0-0	Hex-Hex-Hex-(Hex-)Hex-HexNAc-(DeHex-)HexNAc+Hex1	Hex-Hex-(Hex-Hex-)Hex-HexNAc-(DeHex-)HexNAc+Hex1
					3703	3696	1078.14	1077.48	3	3229.41	34.87	861.859	SINVTGQGFSLIQR	-	No	0	0.53	15.71	1.11	0	TRUE	2.57	3-5-0-1-0	0-0-0-1-0	HexNAc-Hex-Hex-Hex-(Hex-)Hex-HexNAc-HexNAc+NeuAc1	Hex-Hex-Hex-(HexNAc-Hex-)Hex-HexNAc-HexNAc+NeuAc1
					3719	3718	1153.14	1152.81	3	3455.41	34.96	1141.01	EPGSNVTMSVDAECVPMVR	-	No	0	0.86	3.49	2.26	0	TRUE	0.07	2-6-0-0-0	0-1-0-0-0	Hex-Hex-Hex-(Hex-)Hex-HexNAc-HexNAc+HexNAc1	Hex-Hex-(Hex-Hex-)Hex-HexNAc-HexNAc+HexNAc1
					3723	3718	1344.56	1344.56	2	2687.11	34.98	642.808	WQMNFTVR	-	No	1	0.58	8.8	141.14	0	TRUE	1.18	4-4-1-0-0	0-0-1-0-0	Hex-HexNAc-(HexNAc-)Hex-(Hex-)Hex-HexNAc-HexNAc+DeHex1	HexNAc-Hex-(Hex-HexNAc-Hex-)Hex-HexNAc-HexNAc+DeHex1	HexNAc-Hex-(HexNAc-(Hex-)Hex-)Hex-HexNAc-HexNAc+DeHex1	Hex-HexNAc-Hex-(HexNAc-Hex-)Hex-HexNAc-HexNAc+DeHex1	HexNAc-(Hex-)Hex-(HexNAc-Hex-)Hex-HexNAc-HexNAc+DeHex1	HexNAc-(HexNAc-)Hex-(Hex-Hex-)Hex-HexNAc-HexNAc+DeHex1	HexNAc-(Hex-HexNAc-)Hex-(Hex-)Hex-HexNAc-HexNAc+DeHex1
					3798	3795	781.101	780.847	4	3119.36	35.41	436.229	ADEGSLKNISIYTK	-	No	0	0.7	1.01	25.38	0	TRUE	0.31	3-6-0-0-0	0-1-0-0-0	HexNAc-(Hex-)Hex-(Hex-Hex-)Hex-HexNAc-HexNAc+HexNAc1	Hex-HexNAc-Hex-(Hex-Hex-)Hex-HexNAc-HexNAc+HexNAc1	HexNAc-Hex-(Hex-(Hex-)Hex-)Hex-HexNAc-HexNAc+HexNAc1	HexNAc-Hex-(Hex-Hex-Hex-)Hex-HexNAc-HexNAc+HexNAc1	HexNAc-(Hex-Hex-)Hex-(Hex-)Hex-HexNAc-HexNAc+HexNAc1	Hex-HexNAc-(Hex-)Hex-(Hex-)Hex-HexNAc-HexNAc+HexNAc1
					3807	3806	1099.13	1098.79	3	3293.36	35.46	1141.01	EPGSNVTMSVDAECVPMVR	-	No	0	0.95	5.3	0	-2	TRUE	0.59	2-5-0-0-0	0-2-0-0-0	Hex-(Hex-)Hex-HexNAc-HexNAc+HexNAc2
					3864	3861	1058.46	1058.12	3	3171.33	35.79	739.749	AAIPSALDTNSSK	-	No	1	0.96	35.86	164.78	0	TRUE	3.23	4-4-1-1-0	1-0-0-0-0	NeuAc-Hex-HexNAc-Hex-(Hex-)Hex-HexNAc-(DeHex-)HexNAc+Hex1
					3868	3861	1139.46	1138.46	3	3412.35	35.81	1017.95	EETLLYDSNTSSMADR	-	No	0	0.76	15.93	21.63	0	TRUE	2.22	3-6-0-0-0	1-0-0-0-0	Hex-Hex-Hex-Hex-(Hex-)Hex-HexNAc-HexNAc+Hex1	Hex-Hex-Hex-(Hex-Hex-)Hex-HexNAc-HexNAc+Hex1	Hex-Hex-(Hex-Hex-Hex-)Hex-HexNAc-HexNAc+Hex1
					3910	3905	910.418	909.917	4	3635.64	36.05	623.34	RPPLAELAALNLSGSR	-	No	0	0.68	9.15	126.47	-2	TRUE	6.98	5-5-1-0-0	0-2-0-0-0	HexNAc-(HexNAc-)Hex-(HexNAc-Hex-)Hex-HexNAc-(DeHex-)HexNAc+HexNAc2
					4042	4037	1371.6	1371.1	2	2740.18	36.82	682.137	GHTLTLNFTR	-	No	0	0.67	264.8	231.39	0	TRUE	2.94	3-6-0-0-0	0-1-0-0-0	Hex-Hex-(HexNAc-(Hex-)Hex-)Hex-HexNAc-HexNAc+HexNAc1	Hex-Hex-(Hex-HexNAc-Hex-)Hex-HexNAc-HexNAc+HexNAc1	Hex-(Hex-)Hex-(HexNAc-Hex-)Hex-HexNAc-HexNAc+HexNAc1
					4064	4059	928.401	928.401	3	2782.18	36.95	576.784	YSVANDTGFVDIPK	-	No	0	0.93	5.95	31.9	0	TRUE	8.34	3-4-0-0-0	1-0-0-0-0	Hex-Hex-(Hex-)Hex-HexNAc-HexNAc+Hex1	Hex-(Hex-Hex-)Hex-HexNAc-HexNAc+Hex1
					4066	4059	781.352	780.844	4	3119.35	36.96	586.765	IVTPEEYYNVTVQ	-	No	0	0.92	7.29	5.06	0	TRUE	6.03	3-5-1-0-0	0-0-1-0-0	Hex-(Hex-)Hex-(HexNAc-Hex-)Hex-HexNAc-HexNAc+DeHex1	Hex-Hex-Hex-(HexNAc-Hex-)Hex-HexNAc-HexNAc+DeHex1	Hex-Hex-(HexNAc-(Hex-)Hex-)Hex-HexNAc-HexNAc+DeHex1	Hex-Hex-(Hex-HexNAc-Hex-)Hex-HexNAc-HexNAc+DeHex1
					4101	4092	1032.11	1031.77	3	3092.3	37.17	599.018	NLTVCPDGALFEQK	-	No	0	0.97	1.54	12.2	0	TRUE	9.47	5-3-0-0-0	1-0-0-0-0	HexNAc-(HexNAc-)Hex-(Hex-)Hex-HexNAc-HexNAc+Hex1	HexNAc-Hex-(HexNAc-Hex-)Hex-HexNAc-HexNAc+Hex1
					4145	4136	897.423	897.082	3	2688.22	37.43	695.878	KNITDLVEGAK	-	No	0	0.85	14.25	2.34	0	TRUE	3.45	5-3-0-0-0	1-0-0-0-0	HexNAc-(HexNAc-)Hex-(Hex-)Hex-HexNAc-HexNAc+Hex1	HexNAc-Hex-(HexNAc-Hex-)Hex-HexNAc-HexNAc+Hex1
					4172	4169	914.398	914.398	3	2740.17	37.59	454.74	GHTLTLNFTR	-	No	1	0.8	1.28	14.49	-3	TRUE	0.53	3-6-0-0-0	0-3-0-0-0	HexNAc-Hex-(Hex-)Hex-HexNAc-HexNAc+HexNAc3	Hex-(HexNAc-Hex-)Hex-HexNAc-HexNAc+HexNAc3
					4220	4213	919.398	919.067	3	2754.18	37.85	513.722	ANNSWFQSILR	-	No	0	0.79	7.84	20.06	0	TRUE	1.51	3-5-0-0-0	0-1-0-0-0	HexNAc-Hex-(Hex-Hex-)Hex-HexNAc-HexNAc+HexNAc1	Hex-HexNAc-Hex-(Hex-)Hex-HexNAc-HexNAc+HexNAc1	HexNAc-(Hex-)Hex-(Hex-)Hex-HexNAc-HexNAc+HexNAc1
					4222	4213	856.034	856.034	3	2565.08	37.86	837.674	TVLENSTSYEEAK	-	No	0	0.91	5.15	0	-1	TRUE	4	3-3-0-0-0	1-0-0-0-0	Hex-(Hex-)Hex-HexNAc-HexNAc+Hex1
					4225	4224	739.667	738.67	3	2212.99	37.88	682.253	GHTLTLNFTR	-	No	1	0.7	192.82	0	-1	TRUE	0.44	2-4-0-0-0	0-1-0-0-0	Hex-(Hex-)Hex-HexNAc-HexNAc+HexNAc1
					4231	4224	1060.72	1060.72	4	4238.84	37.92	878.409	IIISPEENVTLTCTAENQLER	-	No	0	0.83	15.49	34.96	0	TRUE	10.83	5-4-1-0-0	1-0-0-0-0	Hex-HexNAc-Hex-(HexNAc-Hex-)Hex-HexNAc-(DeHex-)HexNAc+Hex1	HexNAc-(Hex-)Hex-(HexNAc-Hex-)Hex-HexNAc-(DeHex-)HexNAc+Hex1	HexNAc-(HexNAc-)Hex-(Hex-Hex-)Hex-HexNAc-(DeHex-)HexNAc+Hex1	HexNAc-(Hex-HexNAc-)Hex-(Hex-)Hex-HexNAc-(DeHex-)HexNAc+Hex1	Hex-HexNAc-(HexNAc-)Hex-(Hex-)Hex-HexNAc-(DeHex-)HexNAc+Hex1	HexNAc-Hex-(HexNAc-(Hex-)Hex-)Hex-HexNAc-(DeHex-)HexNAc+Hex1	HexNAc-Hex-(Hex-HexNAc-Hex-)Hex-HexNAc-(DeHex-)HexNAc+Hex1
					4242	4235	995.457	995.119	3	2982.33	37.99	973.204	LLHALGGDDFLGMLNR	-	No	1	0.54	13.57	0.95	0	TRUE	7.78	3-3-1-0-0	0-0-1-0-0	HexNAc-Hex-(Hex-)Hex-HexNAc-HexNAc+DeHex1	Hex-(HexNAc-Hex-)Hex-HexNAc-HexNAc+DeHex1
					4297	4290	676.56	676.309	4	2701.21	38.32	563.541	NNQLALTLIDTNR	-	No	0	0.95	2.91	0.35	0	TRUE	6.24	2-5-0-0-0	0-1-0-0-0	Hex-Hex-(Hex-)Hex-HexNAc-HexNAc+HexNAc1	Hex-(Hex-Hex-)Hex-HexNAc-HexNAc+HexNAc1
					4339	4334	932.43	932.092	3	2793.25	38.56	526.507	LVQLFPNDTSLK	-	No	1	0.9	7.3	10.62	0	TRUE	3.85	3-5-0-0-0	0-1-0-0-0	HexNAc-(Hex-)Hex-(Hex-)Hex-HexNAc-HexNAc+HexNAc1	Hex-HexNAc-Hex-(Hex-)Hex-HexNAc-HexNAc+HexNAc1	HexNAc-Hex-(Hex-Hex-)Hex-HexNAc-HexNAc+HexNAc1
					4453	4444	1073.42	1072.75	3	3215.23	39.23	878.409	YEQGTGCWQGPNR	-	No	0	0.97	0.95	0.78	0	TRUE	10.25	5-4-0-0-0	1-0-0-0-0	HexNAc-Hex-(Hex-(HexNAc-)Hex-)Hex-HexNAc-HexNAc+Hex1	HexNAc-(HexNAc-)Hex-(Hex-Hex-)Hex-HexNAc-HexNAc+Hex1	Hex-HexNAc-Hex-(HexNAc-Hex-)Hex-HexNAc-HexNAc+Hex1	HexNAc-Hex-HexNAc-Hex-(Hex-)Hex-HexNAc-HexNAc+Hex1	Hex-HexNAc-(HexNAc-)Hex-(Hex-)Hex-HexNAc-HexNAc+Hex1	HexNAc-(Hex-)Hex-(HexNAc-Hex-)Hex-HexNAc-HexNAc+Hex1
					4484	4477	1132.24	1131.98	4	4523.9	39.41	919.491	NRVPDSCCINVTVGCGINFNEK	-	No	0	0.72	11.93	82.86	0	TRUE	7.45	5-5-1-0-0	1-0-0-0-0	Hex-HexNAc-Hex-HexNAc-Hex-(Hex-)Hex-HexNAc-(DeHex-)HexNAc+Hex1	Hex-(HexNAc-)Hex-(Hex-HexNAc-Hex-)Hex-HexNAc-(DeHex-)HexNAc+Hex1	Hex-(HexNAc-)Hex-(HexNAc-(Hex-)Hex-)Hex-HexNAc-(DeHex-)HexNAc+Hex1	Hex-(Hex-HexNAc-)Hex-(HexNAc-Hex-)Hex-HexNAc-(DeHex-)HexNAc+Hex1	HexNAc-(HexNAc-)Hex-(Hex-Hex-Hex-)Hex-HexNAc-(DeHex-)HexNAc+Hex1	HexNAc-(HexNAc-)Hex-(Hex-(Hex-)Hex-)Hex-HexNAc-(DeHex-)HexNAc+Hex1	HexNAc-(Hex-HexNAc-)Hex-(Hex-Hex-)Hex-HexNAc-(DeHex-)HexNAc+Hex1	Hex-HexNAc-Hex-(Hex-HexNAc-Hex-)Hex-HexNAc-(DeHex-)HexNAc+Hex1	Hex-HexNAc-Hex-(HexNAc-(Hex-)Hex-)Hex-HexNAc-(DeHex-)HexNAc+Hex1	Hex-HexNAc-(HexNAc-)Hex-(Hex-Hex-)Hex-HexNAc-(DeHex-)HexNAc+Hex1	HexNAc-(Hex-)Hex-(Hex-HexNAc-Hex-)Hex-HexNAc-(DeHex-)HexNAc+Hex1	Hex-HexNAc-(Hex-HexNAc-)Hex-(Hex-)Hex-HexNAc-(DeHex-)HexNAc+Hex1	HexNAc-(Hex-Hex-)Hex-(HexNAc-Hex-)Hex-HexNAc-(DeHex-)HexNAc+Hex1	HexNAc-(Hex-)Hex-(HexNAc-(Hex-)Hex-)Hex-HexNAc-(DeHex-)HexNAc+Hex1
					4522	4521	699.324	699.324	4	2793.27	39.64	348.442	KNITDLVEGAK	-	No	0	0.91	7.18	12.75	-2	TRUE	7.78	4-4-1-0-0	2-0-0-0-0	Hex-(Hex-Hex-)Hex-HexNAc-(DeHex-)HexNAc+Hex2	Hex-Hex-(Hex-)Hex-HexNAc-(DeHex-)HexNAc+Hex2
					4541	4532	1237.5	1237.16	3	3708.47	39.74	999.443	TCDWLPKPNMSASCK	-	No	0	0.76	19.82	128.12	-2	TRUE	5.33	4-5-2-0-0	0-0-2-0-0	HexNAc-Hex-HexNAc-Hex-(Hex-Hex-)Hex-HexNAc-HexNAc+DeHex2
					4623	4620	781.834	780.835	4	3119.31	40.25	513.722	ANNSWFQSILR	-	No	1	0.53	16.63	115.63	-2	TRUE	0.47	4-6-0-0-0	0-2-0-0-0	HexNAc-Hex-(HexNAc-(Hex-)Hex-)Hex-HexNAc-HexNAc+HexNAc2	HexNAc-Hex-(Hex-HexNAc-Hex-)Hex-HexNAc-HexNAc+HexNAc2	HexNAc-(Hex-HexNAc-)Hex-(Hex-)Hex-HexNAc-HexNAc+HexNAc2
					4645	4642	877.359	876.356	3	2626.05	40.39	807.377	MSVCTDNVTDLR	-	No	0	0.76	123.72	4.12	0	TRUE	1.58	2-5-0-0-0	0-1-0-0-0	Hex-Hex-(Hex-)Hex-HexNAc-HexNAc+HexNAc1	Hex-(Hex-Hex-)Hex-HexNAc-HexNAc+HexNAc1
					4689	4686	829.377	829.377	3	2485.11	40.65	695.878	KNITDLVEGAK	-	No	0	0.97	15.55	0.17	0	TRUE	10.51	4-3-0-0-0	1-0-0-0-0	HexNAc-Hex-(Hex-)Hex-HexNAc-HexNAc+Hex1	Hex-(HexNAc-Hex-)Hex-HexNAc-HexNAc+Hex1
					4731	4730	985.076	984.742	3	2951.2	40.9	714.015	FANEYPNITR	-	No	0	0.88	1.95	1.25	-2	TRUE	1.82	3-6-1-0-0	1-1-0-0-0	Hex-Hex-Hex-(Hex-)Hex-HexNAc-(DeHex-)HexNAc+Hex1HexNAc1	Hex-Hex-(Hex-Hex-)Hex-HexNAc-(DeHex-)HexNAc+Hex1HexNAc1
					4772	4763	747.325	747.325	4	2985.27	41.13	712.169	FQTVDSSNIDGFVNCTK	-	No	1	0.56	88.64	0	0	TRUE	5.23	2-4-0-0-0	0-1-0-0-0	Hex-(Hex-)Hex-HexNAc-HexNAc+HexNAc1
					4783	4774	921.921	921.669	4	3682.65	41.2	623.34	RPPLAELAALNLSGSR	-	No	0	0.78	8.84	31.24	0	TRUE	1.52	3-6-1-1-0	0-1-0-0-0	NeuAc-Hex-HexNAc-Hex-(Hex-Hex-)Hex-HexNAc-(DeHex-)HexNAc+HexNAc1
					4858	4851	1090.45	1089.94	4	4355.73	41.63	760.893	EPGSNVTMSVDAECVPMVR	-	No	0	0.75	5.17	17.63	-2	TRUE	1.46	5-6-0-1-0	1-1-0-0-0	Hex-HexNAc-(NeuAc-Hex-HexNAc-)Hex-(Hex-)Hex-HexNAc-HexNAc+Hex1HexNAc1	NeuAc-Hex-HexNAc-(Hex-HexNAc-)Hex-(Hex-)Hex-HexNAc-HexNAc+Hex1HexNAc1	NeuAc-Hex-HexNAc-(HexNAc-)Hex-(Hex-Hex-)Hex-HexNAc-HexNAc+Hex1HexNAc1	NeuAc-Hex-HexNAc-(Hex-)Hex-(HexNAc-Hex-)Hex-HexNAc-HexNAc+Hex1HexNAc1	HexNAc-(Hex-)Hex-(NeuAc-Hex-HexNAc-Hex-)Hex-HexNAc-HexNAc+Hex1HexNAc1	NeuAc-Hex-HexNAc-Hex-(HexNAc-(Hex-)Hex-)Hex-HexNAc-HexNAc+Hex1HexNAc1	NeuAc-Hex-HexNAc-Hex-(Hex-HexNAc-Hex-)Hex-HexNAc-HexNAc+Hex1HexNAc1	Hex-HexNAc-Hex-(NeuAc-Hex-HexNAc-Hex-)Hex-HexNAc-HexNAc+Hex1HexNAc1
					4863	4862	733.68	733.344	3	2197.01	41.66	681.828	GHTLTLNFTR	-	No	0	0.97	1.67	0	-1	TRUE	7.78	2-3-1-0-0	0-0-1-0-0	Hex-(Hex-)Hex-HexNAc-HexNAc+DeHex1
					4896	4895	989.435	988.931	4	3951.69	41.84	575.009	SINVTGQGFSLIQR	-	No	0	0.84	0.81	54.95	0	TRUE	5.99	4-10-0-0-0	0-1-0-0-0	Hex-HexNAc-Hex-HexNAc-Hex-(Hex-Hex-Hex-Hex-Hex-)Hex-HexNAc-HexNAc+HexNAc1	Hex-HexNAc-Hex-HexNAc-Hex-(Hex-Hex-Hex-(Hex-)Hex-)Hex-HexNAc-HexNAc+HexNAc1
					4988	4983	740.832	740.326	4	2957.28	42.38	436.229	ADEGSLKNISIYTK	-	No	0	0.97	5.91	0	-3	TRUE	10.73	3-5-0-0-0	1-2-0-0-0	Hex-(Hex-)Hex-HexNAc-HexNAc+Hex1HexNAc2
					4997	4994	1331.55	1331.21	3	3990.62	42.44	1141.01	EPGSNVTMSVDAECVPMVR	-	No	1	0.5	15.07	168.87	-2	TRUE	2.57	4-5-0-1-0	1-1-0-0-0	NeuAc-Hex-HexNAc-Hex-(Hex-)Hex-HexNAc-HexNAc+Hex1HexNAc1
					5030	5027	811.363	810.698	3	2429.07	42.62	790.087	FNVSLDSVPELR	-	No	0	0.97	21.42	0	0	TRUE	7.34	2-4-0-0-0	0-1-0-0-0	Hex-(Hex-)Hex-HexNAc-HexNAc+HexNAc1
					5045	5038	947.37	947.112	4	3784.42	42.7	657.336	DTCTQECSYFNITK	-	No	0	0.91	3.65	14.54	0	TRUE	4.77	3-6-1-1-0	0-0-0-1-0	Hex-HexNAc-(Hex-)Hex-(Hex-Hex-)Hex-HexNAc-(DeHex-)HexNAc+NeuAc1	Hex-Hex-Hex-Hex-(HexNAc-Hex-)Hex-HexNAc-(DeHex-)HexNAc+NeuAc1	Hex-(Hex-)Hex-(Hex-HexNAc-Hex-)Hex-HexNAc-(DeHex-)HexNAc+NeuAc1	Hex-(Hex-)Hex-(HexNAc-(Hex-)Hex-)Hex-HexNAc-(DeHex-)HexNAc+NeuAc1	Hex-(Hex-Hex-)Hex-(HexNAc-Hex-)Hex-HexNAc-(DeHex-)HexNAc+NeuAc1	Hex-Hex-(Hex-)Hex-(HexNAc-Hex-)Hex-HexNAc-(DeHex-)HexNAc+NeuAc1	Hex-HexNAc-Hex-(Hex-Hex-Hex-)Hex-HexNAc-(DeHex-)HexNAc+NeuAc1	Hex-HexNAc-Hex-(Hex-(Hex-)Hex-)Hex-HexNAc-(DeHex-)HexNAc+NeuAc1	HexNAc-(Hex-)Hex-(Hex-Hex-Hex-)Hex-HexNAc-(DeHex-)HexNAc+NeuAc1	HexNAc-(Hex-)Hex-(Hex-(Hex-)Hex-)Hex-HexNAc-(DeHex-)HexNAc+NeuAc1	HexNAc-(Hex-Hex-)Hex-(Hex-Hex-)Hex-HexNAc-(DeHex-)HexNAc+NeuAc1	Hex-Hex-(HexNAc-)Hex-(Hex-Hex-)Hex-HexNAc-(DeHex-)HexNAc+NeuAc1	Hex-Hex-(Hex-HexNAc-)Hex-(Hex-)Hex-HexNAc-(DeHex-)HexNAc+NeuAc1	Hex-Hex-Hex-(HexNAc-)Hex-(Hex-)Hex-HexNAc-(DeHex-)HexNAc+NeuAc1	Hex-Hex-Hex-(HexNAc-(Hex-)Hex-)Hex-HexNAc-(DeHex-)HexNAc+NeuAc1	Hex-Hex-Hex-(Hex-HexNAc-Hex-)Hex-HexNAc-(DeHex-)HexNAc+NeuAc1	Hex-HexNAc-(Hex-Hex-)Hex-(Hex-)Hex-HexNAc-(DeHex-)HexNAc+NeuAc1
					5047	5038	1105.96	1105.71	4	4418.81	42.71	919.491	NRVPDSCCINVTVGCGINFNEK	-	No	0	0.97	1.37	0.7	-3	TRUE	7.85	6-4-0-0-0	3-0-0-0-0	Hex-Hex-(HexNAc-Hex-)Hex-HexNAc-HexNAc+Hex3
					5063	5060	1210.16	1210.16	3	3627.47	42.81	837.136	TVLENSTSYEEAK	-	No	1	0.63	14.89	107.69	0	TRUE	1.14	6-4-0-1-0	1-0-0-0-0	HexNAc-(HexNAc-)Hex-(NeuAc-Hex-HexNAc-Hex-)Hex-HexNAc-HexNAc+Hex1	NeuAc-Hex-HexNAc-(HexNAc-)Hex-(HexNAc-Hex-)Hex-HexNAc-HexNAc+Hex1
					5089	5082	794.57	794.073	4	3172.26	42.97	652.992	NWQLTEEDFGNTSGR	-	No	0	0.66	33.76	40.63	0	TRUE	4.54	3-5-0-0-0	0-1-0-0-0	HexNAc-(Hex-)Hex-(Hex-)Hex-HexNAc-HexNAc+HexNAc1	Hex-HexNAc-Hex-(Hex-)Hex-HexNAc-HexNAc+HexNAc1	HexNAc-Hex-(Hex-Hex-)Hex-HexNAc-HexNAc+HexNAc1
					5094	5093	1488.68	1487.67	2	2973.33	43	1070.37	LNQTEPVAGNYYPVNTR	-	No	1	0.83	291.35	0	0	TRUE	1.64	2-3-1-0-0	0-0-1-0-0	Hex-(Hex-)Hex-HexNAc-HexNAc+DeHex1
					5127	5126	905.412	905.077	3	2712.21	43.18	939.076	QNSNNTRGNANKTQK	-	No	0	0.9	0.31	0	0	TRUE	0.99	2-3-1-0-0	0-0-1-0-0	Hex-(Hex-)Hex-HexNAc-HexNAc+DeHex1
					5144	5137	1274.51	1274.18	3	3819.53	43.28	657.336	DTCTQECSYFNITK	-	No	0	0.98	0.54	3.02	-3	TRUE	8.69	7-3-1-0-0	3-0-0-0-0	HexNAc-(HexNAc-)Hex-(Hex-)Hex-HexNAc-(DeHex-)HexNAc+Hex3	HexNAc-Hex-(HexNAc-Hex-)Hex-HexNAc-(DeHex-)HexNAc+Hex3
					5190	5181	1147.16	1146.84	3	3437.49	43.55	1051.35	TILVDNNTWNNTHISR	-	No	1	0.79	127.55	17.76	0	TRUE	2.77	2-7-0-0-0	0-1-0-0-0	Hex-Hex-Hex-Hex-(Hex-)Hex-HexNAc-HexNAc+HexNAc1	Hex-Hex-Hex-(Hex-Hex-)Hex-HexNAc-HexNAc+HexNAc1	Hex-Hex-(Hex-Hex-Hex-)Hex-HexNAc-HexNAc+HexNAc1
					5232	5225	985.11	984.776	3	2951.31	43.79	949.625	LNLSENYTLSISNAR	-	No	1	0.85	39.78	2.27	0	TRUE	1.08	3-4-0-0-0	1-0-0-0-0	Hex-Hex-(Hex-)Hex-HexNAc-HexNAc+Hex1	Hex-(Hex-Hex-)Hex-HexNAc-HexNAc+Hex1
					5287	5280	799.338	799.338	4	3193.32	44.11	781.669	SDAVSHTGNYTCEVTELTR	-	No	0	0.92	4.77	0	0	TRUE	4.89	2-4-0-0-0	0-1-0-0-0	Hex-(Hex-)Hex-HexNAc-HexNAc+HexNAc1
					5347	5346	846.115	845.61	4	3378.41	44.44	386.443	NTTSYVLR	-	No	0	0.95	0.47	9.05	-3	TRUE	6.65	5-6-3-0-0	0-3-0-0-0	DeHex-HexNAc-(DeHex-HexNAc-)Hex-(HexNAc-Hex-)Hex-HexNAc-(DeHex-)HexNAc+HexNAc3	DeHex-HexNAc-(HexNAc-)Hex-(DeHex-HexNAc-Hex-)Hex-HexNAc-(DeHex-)HexNAc+HexNAc3	HexNAc-(DeHex-HexNAc-)Hex-(DeHex-HexNAc-Hex-)Hex-HexNAc-(DeHex-)HexNAc+HexNAc3
					5452	5445	1497.61	1496.96	3	4487.86	45.04	1316.64	FTFTSHTPGEHQICLHSNSTK	-	No	0	0.86	2.08	47.83	-2	TRUE	4.13	4-5-1-1-0	1-0-0-1-0	Hex-Hex-(HexNAc-(Hex-)Hex-)Hex-HexNAc-(DeHex-)HexNAc+Hex1NeuAc1	Hex-Hex-(Hex-HexNAc-Hex-)Hex-HexNAc-(DeHex-)HexNAc+Hex1NeuAc1	Hex-(Hex-)Hex-(HexNAc-Hex-)Hex-HexNAc-(DeHex-)HexNAc+Hex1NeuAc1
					5461	5456	909.667	909.414	4	3633.63	45.1	695.878	IAVQFGPGFSWIANFTK	-	No	0	0.84	13.24	14.09	0	TRUE	6.65	4-4-0-1-0	0-0-0-1-0	HexNAc-Hex-(Hex-HexNAc-Hex-)Hex-HexNAc-HexNAc+NeuAc1	HexNAc-Hex-(HexNAc-(Hex-)Hex-)Hex-HexNAc-HexNAc+NeuAc1	HexNAc-(Hex-)Hex-(HexNAc-Hex-)Hex-HexNAc-HexNAc+NeuAc1	HexNAc-(HexNAc-)Hex-(Hex-Hex-)Hex-HexNAc-HexNAc+NeuAc1	HexNAc-(Hex-HexNAc-)Hex-(Hex-)Hex-HexNAc-HexNAc+NeuAc1	Hex-HexNAc-(HexNAc-)Hex-(Hex-)Hex-HexNAc-HexNAc+NeuAc1	Hex-HexNAc-Hex-(HexNAc-Hex-)Hex-HexNAc-HexNAc+NeuAc1
					5560	5555	912.356	912.356	3	2734.05	45.67	404.43	GFCEAPGNR	-	No	0	0.61	6.43	35.23	0	TRUE	0.54	3-6-1-0-0	0-1-0-0-0	HexNAc-Hex-(Hex-Hex-Hex-)Hex-HexNAc-(DeHex-)HexNAc+HexNAc1	HexNAc-Hex-(Hex-(Hex-)Hex-)Hex-HexNAc-(DeHex-)HexNAc+HexNAc1	Hex-HexNAc-Hex-(Hex-Hex-)Hex-HexNAc-(DeHex-)HexNAc+HexNAc1	HexNAc-(Hex-)Hex-(Hex-Hex-)Hex-HexNAc-(DeHex-)HexNAc+HexNAc1	HexNAc-(Hex-Hex-)Hex-(Hex-)Hex-HexNAc-(DeHex-)HexNAc+HexNAc1	Hex-HexNAc-(Hex-)Hex-(Hex-)Hex-HexNAc-(DeHex-)HexNAc+HexNAc1
					5595	5588	1142.47	1142.14	3	3423.39	45.89	493.455	AAIPSALDTNSSK	-	No	0	0.92	1	32.35	0	TRUE	7.99	5-7-0-0-0	0-1-0-0-0	Hex-HexNAc-(Hex-)Hex-(HexNAc-(Hex-HexNAc-)Hex-)Hex-HexNAc-HexNAc+HexNAc1	Hex-HexNAc-Hex-HexNAc-(HexNAc-)Hex-(Hex-Hex-)Hex-HexNAc-HexNAc+HexNAc1	Hex-Hex-Hex-(HexNAc-)Hex-(HexNAc-(HexNAc-)Hex-)Hex-HexNAc-HexNAc+HexNAc1	Hex-HexNAc-(Hex-Hex-)Hex-(HexNAc-(HexNAc-)Hex-)Hex-HexNAc-HexNAc+HexNAc1	Hex-HexNAc-(Hex-)Hex-(Hex-HexNAc-(HexNAc-)Hex-)Hex-HexNAc-HexNAc+HexNAc1	Hex-Hex-(Hex-HexNAc-)Hex-(HexNAc-(HexNAc-)Hex-)Hex-HexNAc-HexNAc+HexNAc1	Hex-HexNAc-Hex-HexNAc-(Hex-HexNAc-)Hex-(Hex-)Hex-HexNAc-HexNAc+HexNAc1	Hex-Hex-(HexNAc-)Hex-(HexNAc-(Hex-HexNAc-)Hex-)Hex-HexNAc-HexNAc+HexNAc1	Hex-HexNAc-(Hex-HexNAc-)Hex-(HexNAc-(Hex-)Hex-)Hex-HexNAc-HexNAc+HexNAc1	Hex-HexNAc-(HexNAc-)Hex-(Hex-HexNAc-(Hex-)Hex-)Hex-HexNAc-HexNAc+HexNAc1	Hex-HexNAc-(HexNAc-)Hex-(HexNAc-(Hex-Hex-)Hex-)Hex-HexNAc-HexNAc+HexNAc1	Hex-Hex-(HexNAc-)Hex-(Hex-HexNAc-(HexNAc-)Hex-)Hex-HexNAc-HexNAc+HexNAc1	HexNAc-Hex-HexNAc-(Hex-HexNAc-)Hex-(Hex-Hex-)Hex-HexNAc-HexNAc+HexNAc1	HexNAc-Hex-HexNAc-(HexNAc-)Hex-(Hex-(Hex-)Hex-)Hex-HexNAc-HexNAc+HexNAc1	Hex-HexNAc-(Hex-HexNAc-)Hex-(Hex-HexNAc-Hex-)Hex-HexNAc-HexNAc+HexNAc1	Hex-HexNAc-(HexNAc-)Hex-(Hex-(Hex-HexNAc-)Hex-)Hex-HexNAc-HexNAc+HexNAc1	Hex-HexNAc-(HexNAc-)Hex-(Hex-Hex-(HexNAc-)Hex-)Hex-HexNAc-HexNAc+HexNAc1	Hex-HexNAc-(Hex-HexNAc-)Hex-(Hex-(HexNAc-)Hex-)Hex-HexNAc-HexNAc+HexNAc1	HexNAc-Hex-HexNAc-Hex-(HexNAc-(Hex-Hex-)Hex-)Hex-HexNAc-HexNAc+HexNAc1	HexNAc-Hex-HexNAc-Hex-(Hex-HexNAc-(Hex-)Hex-)Hex-HexNAc-HexNAc+HexNAc1	Hex-HexNAc-Hex-HexNAc-Hex-(Hex-HexNAc-Hex-)Hex-HexNAc-HexNAc+HexNAc1	Hex-HexNAc-Hex-HexNAc-Hex-(HexNAc-(Hex-)Hex-)Hex-HexNAc-HexNAc+HexNAc1	HexNAc-Hex-HexNAc-(Hex-)Hex-(Hex-HexNAc-Hex-)Hex-HexNAc-HexNAc+HexNAc1	HexNAc-Hex-HexNAc-(Hex-)Hex-(HexNAc-(Hex-)Hex-)Hex-HexNAc-HexNAc+HexNAc1	HexNAc-Hex-HexNAc-(Hex-Hex-)Hex-(HexNAc-Hex-)Hex-HexNAc-HexNAc+HexNAc1
					5613	5610	705.328	705.328	4	2817.28	46	575.009	SINVTGQGFSLIQR	-	No	0	0.66	66.61	4.1	0	TRUE	6.41	4-3-0-0-0	1-0-0-0-0	HexNAc-Hex-(Hex-)Hex-HexNAc-HexNAc+Hex1	Hex-(HexNAc-Hex-)Hex-HexNAc-HexNAc+Hex1
					5652	5643	1053.44	1053.44	3	3157.31	46.22	653.286	GNITEYQCHQYITK	-	No	0	0.82	12.31	7.4	0	TRUE	3.48	3-4-1-0-0	0-1-0-0-0	HexNAc-Hex-(Hex-)Hex-HexNAc-(DeHex-)HexNAc+HexNAc1	Hex-(HexNAc-Hex-)Hex-HexNAc-(DeHex-)HexNAc+HexNAc1
					5661	5654	877.92	877.668	4	3506.64	46.27	624.328	VSVNTANVTLGPQLMEVTVYR	-	No	0	0.93	5	4.1	0	TRUE	3.9	2-5-0-0-0	0-1-0-0-0	Hex-Hex-(Hex-)Hex-HexNAc-HexNAc+HexNAc1	Hex-(Hex-Hex-)Hex-HexNAc-HexNAc+HexNAc1
					5699	5698	1060.82	1060.15	3	3177.43	46.5	714.015	DFEDLYTPVNGSIVIVR	-	No	0	0.99	25.97	0	0	TRUE	8.07	3-3-1-0-0	1-0-0-0-0	Hex-(Hex-)Hex-HexNAc-(DeHex-)HexNAc+Hex1
					5721	5720	921.431	920.421	3	2758.24	46.63	622.99	GELNTSIFSSRPIDK	-	No	0	0.99	11.61	0	0	TRUE	9.29	3-3-0-0-0	1-0-0-0-0	Hex-(Hex-)Hex-HexNAc-HexNAc+Hex1
					5740	5731	1139.52	1139.52	3	3415.55	46.75	934.473	RPPLAELAALNLSGSR	-	No	0	0.93	5.45	2.2	-3	TRUE	5.29	4-4-0-1-0	2-0-0-1-0	Hex-Hex-(Hex-)Hex-HexNAc-HexNAc+Hex2NeuAc1	Hex-(Hex-Hex-)Hex-HexNAc-HexNAc+Hex2NeuAc1
					5815	5808	1274.87	1274.52	3	3820.54	47.19	1141.01	EPGSNVTMSVDAECVPMVR	-	No	1	0.64	27.17	15.05	0	TRUE	0.83	3-7-0-0-0	1-0-0-0-0	Hex-Hex-Hex-(Hex-Hex-Hex-)Hex-HexNAc-HexNAc+Hex1	Hex-Hex-Hex-Hex-(Hex-Hex-)Hex-HexNAc-HexNAc+Hex1	Hex-Hex-Hex-Hex-Hex-(Hex-)Hex-HexNAc-HexNAc+Hex1
					5817	5808	891.073	890.741	3	2669.2	47.2	828.728	GNETIVNLIHSTR	-	No	0	0.9	3.63	0.09	0	TRUE	1.83	2-5-0-0-0	0-1-0-0-0	Hex-Hex-(Hex-)Hex-HexNAc-HexNAc+HexNAc1	Hex-(Hex-Hex-)Hex-HexNAc-HexNAc+HexNAc1
					5888	5885	659.563	659.309	4	2633.21	47.62	436.229	ADEGSLKNISIYTK	-	No	0	0.92	2.79	0	0	TRUE	2.13	3-3-0-0-0	1-0-0-0-0	Hex-(Hex-)Hex-HexNAc-HexNAc+Hex1
					5890	5885	935.072	934.74	3	2801.2	47.63	814.264	AGPNGTLFVADAYK	-	No	1	0.93	79.3	17	0	TRUE	1.39	2-6-0-0-0	0-1-0-0-0	Hex-Hex-Hex-(Hex-)Hex-HexNAc-HexNAc+HexNAc1	Hex-Hex-(Hex-Hex-)Hex-HexNAc-HexNAc+HexNAc1
					5952	5951	826.884	826.884	4	3303.51	48	669.296	LSALDNLLNHSSMFLK	-	No	0	0.92	47.39	2.5	-2	TRUE	1.03	5-3-0-0-0	2-0-0-0-0	HexNAc-Hex-(Hex-)Hex-HexNAc-HexNAc+Hex2	Hex-(HexNAc-Hex-)Hex-HexNAc-HexNAc+Hex2
					5965	5962	1166.18	1165.68	4	4658.71	48.08	910.123	TNNSTCQPCPYGSYSNGSDCTR	-	No	0	0.62	14.09	231.75	0	TRUE	4.4	5-6-1-0-0	0-1-0-0-0	Hex-Hex-(HexNAc-)Hex-(HexNAc-(HexNAc-)Hex-)Hex-HexNAc-(DeHex-)HexNAc+HexNAc1	Hex-(Hex-HexNAc-)Hex-(HexNAc-(HexNAc-)Hex-)Hex-HexNAc-(DeHex-)HexNAc+HexNAc1	Hex-(HexNAc-)Hex-(Hex-HexNAc-(HexNAc-)Hex-)Hex-HexNAc-(DeHex-)HexNAc+HexNAc1	Hex-(HexNAc-)Hex-(HexNAc-(Hex-HexNAc-)Hex-)Hex-HexNAc-(DeHex-)HexNAc+HexNAc1	Hex-HexNAc-(HexNAc-)Hex-(Hex-(HexNAc-)Hex-)Hex-HexNAc-(DeHex-)HexNAc+HexNAc1	HexNAc-(Hex-HexNAc-)Hex-(Hex-(HexNAc-)Hex-)Hex-HexNAc-(DeHex-)HexNAc+HexNAc1	HexNAc-(HexNAc-)Hex-(Hex-(Hex-HexNAc-)Hex-)Hex-HexNAc-(DeHex-)HexNAc+HexNAc1	HexNAc-(HexNAc-)Hex-(Hex-Hex-(HexNAc-)Hex-)Hex-HexNAc-(DeHex-)HexNAc+HexNAc1
					5989	5984	1202.52	1202.52	2	2403.03	48.22	1349.68	VINETWAWK	-	No	0	0.91	8.51	0	-2	TRUE	4.98	3-4-0-0-0	1-1-0-0-0	Hex-(Hex-)Hex-HexNAc-HexNAc+Hex1HexNAc1
					6026	6017	759.654	759.313	3	2274.92	48.43	712.657	DAGVVCTNETR	-	No	0	0.83	8.13	0	0	TRUE	0.21	2-4-0-0-0	0-1-0-0-0	Hex-(Hex-)Hex-HexNAc-HexNAc+HexNAc1
					6057	6050	858.028	857.692	3	2570.05	48.61	576.291	NATVVWMK	-	No	0	0.94	6.68	2.36	0	TRUE	6.84	4-5-0-0-0	1-0-0-0-0	HexNAc-Hex-Hex-Hex-(Hex-)Hex-HexNAc-HexNAc+Hex1	Hex-Hex-Hex-(HexNAc-Hex-)Hex-HexNAc-HexNAc+Hex1
					6125	6116	1232.57	1232.23	3	3693.68	49.01	832.102	VSVNTANVTLGPQLMEVTVYR	-	No	0	0.98	2.93	8.43	0	TRUE	10.11	3-4-1-0-0	0-1-0-0-0	HexNAc-Hex-(Hex-)Hex-HexNAc-(DeHex-)HexNAc+HexNAc1	Hex-(HexNAc-Hex-)Hex-HexNAc-(DeHex-)HexNAc+HexNAc1
					6143	6138	1283.2	1282.86	3	3845.55	49.12	761.011	EPGSNVTMSVDAECVPMVR	-	No	0	0.95	8.73	7.85	-3	TRUE	4.25	4-5-1-0-0	2-1-0-0-0	Hex-Hex-(Hex-)Hex-HexNAc-(DeHex-)HexNAc+Hex2HexNAc1	Hex-(Hex-Hex-)Hex-HexNAc-(DeHex-)HexNAc+Hex2HexNAc1
					6178	6171	1016.4	1015.73	3	3044.16	49.32	914.944	TCNPETFPSSNESR	-	No	0	0.95	4.72	0.48	0	TRUE	7.94	3-5-0-0-0	0-1-0-0-0	HexNAc-(Hex-)Hex-(Hex-)Hex-HexNAc-HexNAc+HexNAc1	Hex-HexNAc-Hex-(Hex-)Hex-HexNAc-HexNAc+HexNAc1	HexNAc-Hex-(Hex-Hex-)Hex-HexNAc-HexNAc+HexNAc1
					6211	6204	752.338	752.338	3	2253.99	49.51	682.034	GHTLTLNFTR	-	No	1	0.51	104.48	0	0	TRUE	9.75	3-3-0-0-0	1-0-0-0-0	Hex-(Hex-)Hex-HexNAc-HexNAc+Hex1
					6253	6248	994.17	993.916	4	3971.64	49.75	919.491	NRVPDSCCINVTVGCGINFNEK	-	No	0	0.92	12.65	5.39	0	TRUE	4.79	3-5-0-0-0	1-0-0-0-0	Hex-Hex-Hex-(Hex-)Hex-HexNAc-HexNAc+Hex1	Hex-Hex-(Hex-Hex-)Hex-HexNAc-HexNAc+Hex1
					6306	6303	1326.89	1326.54	3	3976.61	50.06	1158.93	NYEIIQQPMSYDNLTQR	-	No	1	0.81	121.37	7.5	-3	TRUE	4.91	2-9-0-0-0	0-3-0-0-0	Hex-Hex-Hex-Hex-(Hex-)Hex-HexNAc-HexNAc+HexNAc3	Hex-Hex-Hex-(Hex-Hex-)Hex-HexNAc-HexNAc+HexNAc3	Hex-Hex-(Hex-Hex-Hex-)Hex-HexNAc-HexNAc+HexNAc3
					6312	6303	1058.08	1057.41	3	3169.22	50.09	657.336	DTCTQECSYFNITK	-	No	1	0.98	2.87	21.76	0	TRUE	6.24	3-4-1-0-0	0-1-0-0-0	DeHex-HexNAc-Hex-(Hex-)Hex-HexNAc-HexNAc+HexNAc1
					6352	6347	1309.61	1309.27	3	3924.79	50.32	1035.45	VVLLDPKPVANVTCVNK	-	No	1	0.66	7.4	147.91	0	TRUE	2.92	4-5-1-1-0	0-0-0-1-0	Hex-HexNAc-Hex-(Hex-HexNAc-Hex-)Hex-HexNAc-(DeHex-)HexNAc+NeuAc1	Hex-HexNAc-Hex-(HexNAc-(Hex-)Hex-)Hex-HexNAc-(DeHex-)HexNAc+NeuAc1	Hex-HexNAc-Hex-HexNAc-Hex-(Hex-)Hex-HexNAc-(DeHex-)HexNAc+NeuAc1	HexNAc-(Hex-)Hex-(Hex-HexNAc-Hex-)Hex-HexNAc-(DeHex-)HexNAc+NeuAc1	HexNAc-(Hex-)Hex-(HexNAc-(Hex-)Hex-)Hex-HexNAc-(DeHex-)HexNAc+NeuAc1	HexNAc-(Hex-Hex-)Hex-(HexNAc-Hex-)Hex-HexNAc-(DeHex-)HexNAc+NeuAc1	Hex-HexNAc-(Hex-HexNAc-)Hex-(Hex-)Hex-HexNAc-(DeHex-)HexNAc+NeuAc1
					6392	6391	836.63	836.378	4	3341.48	50.55	526.015	TILVDNNTWNNTHISR	-	No	1	0.85	7.07	10.61	0	TRUE	0.44	4-3-1-0-0	1-0-0-0-0	HexNAc-Hex-(Hex-)Hex-HexNAc-(DeHex-)HexNAc+Hex1	Hex-(HexNAc-Hex-)Hex-HexNAc-(DeHex-)HexNAc+Hex1
					6398	6391	702.323	701.817	4	2803.24	50.58	427.967	ENTSDPSLVIAFGR	-	No	0	0.7	8.04	0	-2	TRUE	1.92	4-3-0-0-0	2-0-0-0-0	Hex-(Hex-)Hex-HexNAc-HexNAc+Hex2
					6409	6402	1297.55	1297.21	3	3888.6	50.65	680.998	NPNGTVTVISR	-	No	0	0.78	3.7	204.57	0	TRUE	3.83	5-7-0-2-0	0-0-0-1-0	NeuAc-Hex-HexNAc-(Hex-HexNAc-Hex-HexNAc-)Hex-(Hex-Hex-)Hex-HexNAc-HexNAc+NeuAc1	NeuAc-Hex-HexNAc-(Hex-HexNAc-Hex-Hex-)Hex-(HexNAc-Hex-)Hex-HexNAc-HexNAc+NeuAc1
					6451	6446	1017.43	1017.43	3	3049.28	50.89	776.038	ALGFENATQALGR	-	No	1	0.56	22.85	12.86	-2	TRUE	1.6	2-8-0-0-0	0-2-0-0-0	Hex-Hex-Hex-Hex-(Hex-)Hex-HexNAc-HexNAc+HexNAc2	Hex-Hex-Hex-(Hex-Hex-)Hex-HexNAc-HexNAc+HexNAc2	Hex-Hex-(Hex-Hex-Hex-)Hex-HexNAc-HexNAc+HexNAc2
					6517	6512	1140.49	1140.15	3	3417.43	51.27	1020.14	ANIQFGDNGTTISAVSNK	-	No	0	0.85	18.95	5.34	0	TRUE	8.43	3-6-0-0-0	0-1-0-0-0	Hex-HexNAc-(Hex-)Hex-(Hex-)Hex-HexNAc-HexNAc+HexNAc1	HexNAc-(Hex-Hex-)Hex-(Hex-)Hex-HexNAc-HexNAc+HexNAc1	HexNAc-(Hex-)Hex-(Hex-Hex-)Hex-HexNAc-HexNAc+HexNAc1	Hex-HexNAc-Hex-(Hex-Hex-)Hex-HexNAc-HexNAc+HexNAc1	HexNAc-Hex-(Hex-(Hex-)Hex-)Hex-HexNAc-HexNAc+HexNAc1	HexNAc-Hex-(Hex-Hex-Hex-)Hex-HexNAc-HexNAc+HexNAc1
					6627	6622	1331.24	1330.57	3	3988.68	51.92	1232.85	TNSTFVQALVEHVKEECDR	-	No	0	0.87	11.37	5.9	-2	TRUE	3.61	3-6-1-0-0	1-0-1-0-0	Hex-Hex-(Hex-Hex-Hex-)Hex-HexNAc-HexNAc+Hex1DeHex1	Hex-Hex-Hex-(Hex-Hex-)Hex-HexNAc-HexNAc+Hex1DeHex1	Hex-Hex-Hex-Hex-(Hex-)Hex-HexNAc-HexNAc+Hex1DeHex1
					6682	6677	1250.83	1250.48	3	3748.43	52.24	1124.33	ISNSSDTVECECSENWK	-	No	0	0.88	20.88	1.47	-3	TRUE	7.42	6-3-0-0-0	3-0-0-0-0	HexNAc-Hex-(Hex-)Hex-HexNAc-HexNAc+Hex3	Hex-(HexNAc-Hex-)Hex-HexNAc-HexNAc+Hex3
					6684	6677	1477.18	1476.68	2	2951.34	52.25	889.324	GVFITNETGQPLIGK	-	No	1	0.8	52.02	14.02	0	TRUE	3.47	2-6-0-0-0	0-1-0-0-0	Hex-Hex-Hex-(Hex-)Hex-HexNAc-HexNAc+HexNAc1	Hex-Hex-(Hex-Hex-)Hex-HexNAc-HexNAc+HexNAc1
					6693	6688	1195.99	1195.74	4	4778.92	52.3	878.081	FTFTSHTPGEHQICLHSNSTK	-	No	1	0.73	15.9	124.6	0	TRUE	10.22	4-5-1-2-0	0-0-0-1-0	NeuAc-Hex-HexNAc-(HexNAc-)Hex-(Hex-Hex-)Hex-HexNAc-(DeHex-)HexNAc+NeuAc1	Hex-(HexNAc-)Hex-(NeuAc-Hex-HexNAc-Hex-)Hex-HexNAc-(DeHex-)HexNAc+NeuAc1
					6788	6787	1170.45	1169.7	4	4674.78	52.86	950.503	KENSSEICSNNGECVCGQCVCR	-	No	1	0.86	26.48	23.49	-3	TRUE	2.3	6-5-0-0-0	3-0-0-0-0	HexNAc-Hex-(Hex-Hex-Hex-)Hex-HexNAc-HexNAc+Hex3	HexNAc-Hex-(Hex-(Hex-)Hex-)Hex-HexNAc-HexNAc+Hex3	Hex-HexNAc-Hex-(Hex-Hex-)Hex-HexNAc-HexNAc+Hex3	HexNAc-(Hex-)Hex-(Hex-Hex-)Hex-HexNAc-HexNAc+Hex3	HexNAc-(Hex-Hex-)Hex-(Hex-)Hex-HexNAc-HexNAc+Hex3	Hex-HexNAc-(Hex-)Hex-(Hex-)Hex-HexNAc-HexNAc+Hex3
					6950	6941	1284.52	1284.2	3	3849.57	53.8	1172.25	SDAVSHTGNYTCEVTELTR	-	No	0	0.65	31.51	4.26	-2	TRUE	0.25	3-5-0-1-0	1-0-0-1-0	Hex-Hex-(Hex-Hex-)Hex-HexNAc-HexNAc+Hex1NeuAc1	Hex-Hex-Hex-(Hex-)Hex-HexNAc-HexNAc+Hex1NeuAc1
					6979	6974	1023.48	1022.8	3	3065.39	53.98	685.006	LSHDANETLPLHLYVK	-	No	0	0.89	35.09	13.37	0	TRUE	4.62	2-5-0-0-0	0-1-0-0-0	Hex-Hex-(Hex-)Hex-HexNAc-HexNAc+HexNAc1	Hex-(Hex-Hex-)Hex-HexNAc-HexNAc+HexNAc1
					7005	6996	1482.28	1481.6	3	4441.77	54.13	879.1	IVTPEEYYNVTVQ	-	No	1	0.76	14.87	121.38	-3	TRUE	9.56	8-6-0-1-0	2-0-0-1-0	HexNAc-Hex-HexNAc-(HexNAc-)Hex-(Hex-HexNAc-(Hex-)Hex-)Hex-HexNAc-HexNAc+Hex2NeuAc1	HexNAc-Hex-HexNAc-Hex-HexNAc-(Hex-HexNAc-)Hex-(Hex-)Hex-HexNAc-HexNAc+Hex2NeuAc1	HexNAc-Hex-HexNAc-Hex-HexNAc-Hex-(HexNAc-(Hex-)Hex-)Hex-HexNAc-HexNAc+Hex2NeuAc1	Hex-HexNAc-Hex-HexNAc-(HexNAc-)Hex-(HexNAc-(Hex-)Hex-)Hex-HexNAc-HexNAc+Hex2NeuAc1	HexNAc-Hex-HexNAc-(HexNAc-)Hex-(Hex-Hex-(HexNAc-)Hex-)Hex-HexNAc-HexNAc+Hex2NeuAc1	Hex-HexNAc-(HexNAc-)Hex-(HexNAc-Hex-HexNAc-(Hex-)Hex-)Hex-HexNAc-HexNAc+Hex2NeuAc1	Hex-HexNAc-(HexNAc-Hex-HexNAc-)Hex-(HexNAc-(Hex-)Hex-)Hex-HexNAc-HexNAc+Hex2NeuAc1	HexNAc-Hex-HexNAc-(Hex-HexNAc-)Hex-(HexNAc-(Hex-)Hex-)Hex-HexNAc-HexNAc+Hex2NeuAc1	Hex-Hex-(HexNAc-)Hex-(HexNAc-Hex-HexNAc-(HexNAc-)Hex-)Hex-HexNAc-HexNAc+Hex2NeuAc1	Hex-Hex-(HexNAc-Hex-HexNAc-)Hex-(HexNAc-(HexNAc-)Hex-)Hex-HexNAc-HexNAc+Hex2NeuAc1	Hex-HexNAc-(Hex-)Hex-(HexNAc-Hex-HexNAc-(HexNAc-)Hex-)Hex-HexNAc-HexNAc+Hex2NeuAc1	HexNAc-Hex-HexNAc-(Hex-)Hex-(HexNAc-Hex-HexNAc-Hex-)Hex-HexNAc-HexNAc+Hex2NeuAc1	HexNAc-Hex-HexNAc-(Hex-)Hex-(Hex-HexNAc-(HexNAc-)Hex-)Hex-HexNAc-HexNAc+Hex2NeuAc1	HexNAc-Hex-HexNAc-(Hex-Hex-)Hex-(HexNAc-(HexNAc-)Hex-)Hex-HexNAc-HexNAc+Hex2NeuAc1	Hex-HexNAc-Hex-HexNAc-(Hex-)Hex-(HexNAc-(HexNAc-)Hex-)Hex-HexNAc-HexNAc+Hex2NeuAc1	HexNAc-Hex-HexNAc-Hex-HexNAc-(Hex-)Hex-(HexNAc-Hex-)Hex-HexNAc-HexNAc+Hex2NeuAc1	Hex-HexNAc-Hex-HexNAc-(HexNAc-Hex-HexNAc-)Hex-(Hex-)Hex-HexNAc-HexNAc+Hex2NeuAc1	Hex-HexNAc-Hex-HexNAc-(Hex-HexNAc-)Hex-(HexNAc-Hex-)Hex-HexNAc-HexNAc+Hex2NeuAc1	HexNAc-Hex-HexNAc-Hex-(HexNAc-Hex-HexNAc-(Hex-)Hex-)Hex-HexNAc-HexNAc+Hex2NeuAc1	HexNAc-Hex-HexNAc-(Hex-HexNAc-)Hex-(Hex-(HexNAc-)Hex-)Hex-HexNAc-HexNAc+Hex2NeuAc1	Hex-HexNAc-Hex-HexNAc-Hex-(HexNAc-Hex-HexNAc-Hex-)Hex-HexNAc-HexNAc+Hex2NeuAc1	Hex-HexNAc-Hex-HexNAc-Hex-(Hex-HexNAc-(HexNAc-)Hex-)Hex-HexNAc-HexNAc+Hex2NeuAc1	HexNAc-Hex-HexNAc-Hex-HexNAc-Hex-(Hex-HexNAc-Hex-)Hex-HexNAc-HexNAc+Hex2NeuAc1	Hex-HexNAc-Hex-HexNAc-(HexNAc-)Hex-(Hex-HexNAc-Hex-)Hex-HexNAc-HexNAc+Hex2NeuAc1	HexNAc-Hex-HexNAc-Hex-HexNAc-Hex-(Hex-(HexNAc-)Hex-)Hex-HexNAc-HexNAc+Hex2NeuAc1
					7107	7106	985.957	985.456	4	3937.79	54.74	624.328	VSVNTANVTLGPQLMEVTVYR	-	No	0	0.97	0.87	0	-3	TRUE	6.32	5-3-1-0-0	3-0-0-0-0	Hex-(Hex-)Hex-HexNAc-(DeHex-)HexNAc+Hex3
					7126	7117	1125.15	1125.15	3	3372.43	54.85	856.297	VVLGANGTYSCLVR	-	No	1	0.76	21.31	21.76	0	TRUE	1.81	2-9-0-0-0	0-1-0-0-0	Hex-Hex-Hex-Hex-Hex-Hex-(Hex-)Hex-HexNAc-HexNAc+HexNAc1	Hex-Hex-Hex-Hex-Hex-(Hex-Hex-)Hex-HexNAc-HexNAc+HexNAc1	Hex-Hex-Hex-Hex-(Hex-Hex-Hex-)Hex-HexNAc-HexNAc+HexNAc1	Hex-Hex-Hex-(Hex-Hex-Hex-Hex-)Hex-HexNAc-HexNAc+HexNAc1
					7142	7139	1154.88	1154.54	3	3460.61	54.95	1143.92	TNITLVCKPGDLESAPVLR	-	No	1	0.78	165.49	6.71	0	TRUE	2.4	2-6-0-0-0	0-1-0-0-0	Hex-Hex-Hex-(Hex-)Hex-HexNAc-HexNAc+HexNAc1	Hex-Hex-(Hex-Hex-)Hex-HexNAc-HexNAc+HexNAc1
					7148	7139	1103.82	1103.16	3	3306.45	54.99	649.148	LLHALGGDDFLGMLNR	-	No	0	0.67	16.27	0	-3	TRUE	3.32	3-5-1-0-0	1-2-0-0-0	Hex-(Hex-)Hex-HexNAc-(DeHex-)HexNAc+Hex1HexNAc2
					7159	7150	1270.53	1270.18	3	3807.53	55.05	789.92	FNVSLDSVPELR	-	No	0	0.78	8.44	154.23	-3	TRUE	9.04	4-10-0-0-0	0-3-0-0-0	HexNAc-Hex-HexNAc-Hex-(Hex-Hex-Hex-Hex-)Hex-HexNAc-HexNAc+HexNAc3	HexNAc-Hex-HexNAc-Hex-(Hex-(Hex-Hex-)Hex-)Hex-HexNAc-HexNAc+HexNAc3	HexNAc-Hex-HexNAc-Hex-(Hex-Hex-(Hex-)Hex-)Hex-HexNAc-HexNAc+HexNAc3	Hex-HexNAc-Hex-HexNAc-Hex-(Hex-Hex-Hex-)Hex-HexNAc-HexNAc+HexNAc3	Hex-HexNAc-Hex-HexNAc-Hex-(Hex-(Hex-)Hex-)Hex-HexNAc-HexNAc+HexNAc3	HexNAc-Hex-HexNAc-(Hex-)Hex-(Hex-(Hex-)Hex-)Hex-HexNAc-HexNAc+HexNAc3	HexNAc-Hex-HexNAc-(Hex-Hex-)Hex-(Hex-Hex-)Hex-HexNAc-HexNAc+HexNAc3	Hex-HexNAc-Hex-HexNAc-(Hex-)Hex-(Hex-Hex-)Hex-HexNAc-HexNAc+HexNAc3	HexNAc-Hex-HexNAc-(Hex-)Hex-(Hex-Hex-Hex-)Hex-HexNAc-HexNAc+HexNAc3
					7168	7161	866.407	866.16	4	3460.61	55.11	856.94	YLQPLLAVQFTNLTMDTEIR	-	No	0	0.91	5.08	0	0	TRUE	8.96	3-3-0-0-0	1-0-0-0-0	Hex-(Hex-)Hex-HexNAc-HexNAc+Hex1
					7177	7172	859.162	858.651	4	3430.57	55.17	517.927	VVLLDPKPVANVTCVNK	-	No	0	0.96	1.82	6.01	0	TRUE	8.26	3-5-1-0-0	0-1-0-0-0	Hex-Hex-(HexNAc-Hex-)Hex-HexNAc-(DeHex-)HexNAc+HexNAc1
					7184	7183	1216.16	1215.15	3	3642.44	55.21	646.665	FDITGVPANR	-	No	0	0.85	1.85	132.26	0	TRUE	8.58	5-5-1-2-0	0-0-0-1-0	NeuAc-Hex-HexNAc-Hex-(HexNAc-Hex-HexNAc-Hex-)Hex-HexNAc-(DeHex-)HexNAc+NeuAc1	NeuAc-Hex-HexNAc-Hex-(Hex-HexNAc-(HexNAc-)Hex-)Hex-HexNAc-(DeHex-)HexNAc+NeuAc1	NeuAc-Hex-HexNAc-(HexNAc-Hex-HexNAc-)Hex-(Hex-)Hex-HexNAc-(DeHex-)HexNAc+NeuAc1
					7208	7205	1026.47	1025.8	3	3074.39	55.35	889.162	GVFITNETGQPLIGK	-	No	0	0.79	30.13	0	-3	TRUE	7.78	5-3-0-0-0	3-0-0-0-0	Hex-(Hex-)Hex-HexNAc-HexNAc+Hex3
					7322	7315	798.69	798.355	3	2392.04	56.03	771.58	VNCSVYVQLEK	-	No	0	0.82	27.69	0	0	TRUE	1.74	2-4-0-0-0	0-1-0-0-0	Hex-(Hex-)Hex-HexNAc-HexNAc+HexNAc1
					7331	7326	659.896	659.692	5	3293.42	56.08	469.494	GDQLILNLNNISSDR	-	No	0	0.94	42.54	18.78	0	TRUE	8.23	4-5-0-0-0	1-0-0-0-0	Hex-(Hex-)Hex-(HexNAc-Hex-)Hex-HexNAc-HexNAc+Hex1	Hex-Hex-(HexNAc-(Hex-)Hex-)Hex-HexNAc-HexNAc+Hex1	Hex-Hex-(Hex-HexNAc-Hex-)Hex-HexNAc-HexNAc+Hex1
					7340	7337	691.569	691.32	4	2761.25	56.14	643.245	IVSPEPGGAVGPNLTCR	-	No	0	0.58	17.12	0	0	TRUE	2.56	2-3-1-0-0	0-0-1-0-0	Hex-(Hex-)Hex-HexNAc-HexNAc+DeHex1
					7360	7359	985.96	985.454	4	3937.79	56.26	832.102	VSVNTANVTLGPQLMEVTVYR	-	No	0	0.94	7.28	8.76	0	TRUE	8.31	5-3-1-0-0	1-0-0-0-0	DeHex-HexNAc-(HexNAc-)Hex-(Hex-)Hex-HexNAc-HexNAc+Hex1	DeHex-HexNAc-Hex-(HexNAc-Hex-)Hex-HexNAc-HexNAc+Hex1
					7401	7392	810.717	810.381	3	2428.12	56.49	789.536	LVQLFPNDTSLK	-	No	1	0.65	100.05	0	0	TRUE	4.52	2-4-0-0-0	0-1-0-0-0	Hex-(Hex-)Hex-HexNAc-HexNAc+HexNAc1
					7419	7414	969.662	969.406	4	3873.59	56.61	526.949	FNVSLDSVPELR	-	No	0	0.86	17.09	28.36	-3	TRUE	7.56	6-7-1-0-0	0-3-0-0-0	HexNAc-(HexNAc-)Hex-(Hex-HexNAc-(HexNAc-)Hex-)Hex-HexNAc-(DeHex-)HexNAc+HexNAc3	HexNAc-(Hex-HexNAc-)Hex-(HexNAc-(HexNAc-)Hex-)Hex-HexNAc-(DeHex-)HexNAc+HexNAc3	Hex-HexNAc-(HexNAc-)Hex-(HexNAc-(HexNAc-)Hex-)Hex-HexNAc-(DeHex-)HexNAc+HexNAc3	HexNAc-(HexNAc-)Hex-(HexNAc-(Hex-HexNAc-)Hex-)Hex-HexNAc-(DeHex-)HexNAc+HexNAc3
					7434	7425	1117.14	1116.8	3	3347.39	56.7	900.436	DMSDGFISNLTIQR	-	No	0	0.72	29.1	3.89	-3	TRUE	3.28	4-4-0-1-0	2-0-0-1-0	Hex-Hex-(Hex-)Hex-HexNAc-HexNAc+Hex2NeuAc1	Hex-(Hex-Hex-)Hex-HexNAc-HexNAc+Hex2NeuAc1
					7483	7480	1001.78	1001.45	3	3001.32	56.99	636.27	AFGQFFSPGEVIYNK	-	No	1	0.95	8.42	5.37	0	TRUE	0.81	4-3-0-0-0	1-0-0-0-0	HexNAc-Hex-(Hex-)Hex-HexNAc-HexNAc+Hex1	Hex-(HexNAc-Hex-)Hex-HexNAc-HexNAc+Hex1
					7514	7513	877.398	877.065	3	2628.17	57.18	808.3	FQLLNFSSSELK	-	No	0	0.88	6.88	0.23	0	TRUE	3.99	2-5-0-0-0	0-1-0-0-0	Hex-Hex-(Hex-)Hex-HexNAc-HexNAc+HexNAc1	Hex-(Hex-Hex-)Hex-HexNAc-HexNAc+HexNAc1
					7591	7590	778.369	778.118	4	3108.44	57.65	623.348	RPPLAELAALNLSGSR	-	No	0	0.99	1.45	0.72	-2	TRUE	10.84	4-3-1-0-0	1-0-1-0-0	HexNAc-Hex-(Hex-)Hex-HexNAc-HexNAc+Hex1DeHex1	Hex-(HexNAc-Hex-)Hex-HexNAc-HexNAc+Hex1DeHex1
					7602	7601	1023.68	1023.18	4	4088.7	57.71	972.201	HNNDTQHIWESDSNEFSVIADPR	-	No	1	0.76	173.08	132.91	0	TRUE	5.91	2-6-0-0-0	0-1-0-0-0	Hex-Hex-Hex-(Hex-)Hex-HexNAc-HexNAc+HexNAc1	Hex-Hex-(Hex-Hex-)Hex-HexNAc-HexNAc+HexNAc1
					7615	7612	985.958	985.455	4	3937.79	57.79	624.328	VSVNTANVTLGPQLMEVTVYR	-	No	0	0.92	7.65	7.1	-3	TRUE	7.19	5-3-1-0-0	2-0-1-0-0	HexNAc-Hex-(Hex-)Hex-HexNAc-HexNAc+Hex2DeHex1	Hex-(HexNAc-Hex-)Hex-HexNAc-HexNAc+Hex2DeHex1
					7621	7612	960.762	960.762	3	2879.26	57.83	933.584	GELNTSIFSSRPIDK	-	No	0	0.93	22.87	1.25	0	TRUE	9.75	2-5-0-0-0	0-1-0-0-0	Hex-Hex-(Hex-)Hex-HexNAc-HexNAc+HexNAc1	Hex-(Hex-Hex-)Hex-HexNAc-HexNAc+HexNAc1
					7624	7623	1314.28	1313.62	3	3937.83	57.85	832.102	VSVNTANVTLGPQLMEVTVYR	-	No	0	0.94	0.53	0.59	-2	TRUE	3.53	5-3-1-0-0	2-0-0-0-0	HexNAc-Hex-(Hex-)Hex-HexNAc-(DeHex-)HexNAc+Hex2	Hex-(HexNAc-Hex-)Hex-HexNAc-(DeHex-)HexNAc+Hex2
					7641	7634	983.171	982.661	4	3926.61	57.95	828.354	VDNITDQFCNASVVDPACVR	-	No	0	0.96	53.6	0	-3	TRUE	8.52	5-3-1-0-0	3-0-0-0-0	Hex-(Hex-)Hex-HexNAc-(DeHex-)HexNAc+Hex3
					7643	7634	1257.2	1256.54	3	3766.59	57.96	1020.14	ANIQFGDNGTTISAVSNK	-	No	1	0.89	58.92	8.14	0	TRUE	4.02	4-6-1-0-0	1-0-0-0-0	Hex-(DeHex-)HexNAc-Hex-(Hex-Hex-Hex-)Hex-HexNAc-HexNAc+Hex1	Hex-(DeHex-)HexNAc-Hex-(Hex-(Hex-)Hex-)Hex-HexNAc-HexNAc+Hex1	Hex-(DeHex-)HexNAc-(Hex-Hex-)Hex-(Hex-)Hex-HexNAc-HexNAc+Hex1	DeHex-HexNAc-(Hex-Hex-Hex-)Hex-(Hex-)Hex-HexNAc-HexNAc+Hex1	Hex-(DeHex-)HexNAc-(Hex-)Hex-(Hex-Hex-)Hex-HexNAc-HexNAc+Hex1
					7652	7645	1348.57	1348.57	3	4042.69	58.02	1158.54	NYEIIQQPMSYDNLTQR	-	No	0	0.77	3.13	2.43	-2	TRUE	0.06	4-6-1-0-0	0-2-0-0-0	Hex-HexNAc-Hex-(HexNAc-Hex-)Hex-HexNAc-(DeHex-)HexNAc+HexNAc2	HexNAc-Hex-(HexNAc-(Hex-)Hex-)Hex-HexNAc-(DeHex-)HexNAc+HexNAc2	HexNAc-Hex-(Hex-HexNAc-Hex-)Hex-HexNAc-(DeHex-)HexNAc+HexNAc2	HexNAc-(Hex-)Hex-(HexNAc-Hex-)Hex-HexNAc-(DeHex-)HexNAc+HexNAc2	HexNAc-(HexNAc-)Hex-(Hex-Hex-)Hex-HexNAc-(DeHex-)HexNAc+HexNAc2	Hex-HexNAc-(HexNAc-)Hex-(Hex-)Hex-HexNAc-(DeHex-)HexNAc+HexNAc2	HexNAc-(Hex-HexNAc-)Hex-(Hex-)Hex-HexNAc-(DeHex-)HexNAc+HexNAc2
					7714	7711	1144.15	1143.49	3	3427.44	58.38	879.923	SPIVTHCNVSTVNK	-	No	0	0.83	0.9	3.15	-2	TRUE	0.57	3-6-0-1-0	1-0-0-1-0	Hex-Hex-Hex-Hex-(Hex-)Hex-HexNAc-HexNAc+Hex1NeuAc1	Hex-Hex-Hex-(Hex-Hex-)Hex-HexNAc-HexNAc+Hex1NeuAc1	Hex-Hex-(Hex-Hex-Hex-)Hex-HexNAc-HexNAc+Hex1NeuAc1
					7718	7711	1237.2	1236.54	3	3706.6	58.4	998.813	NMTFDLPSDATVVLNR	-	No	0	0.75	24.07	159.57	0	TRUE	0.2	4-5-2-0-0	1-0-0-0-0	DeHex-HexNAc-(Hex-Hex-)Hex-(Hex-)Hex-HexNAc-(DeHex-)HexNAc+Hex1	DeHex-HexNAc-(Hex-)Hex-(Hex-Hex-)Hex-HexNAc-(DeHex-)HexNAc+Hex1	DeHex-HexNAc-Hex-(Hex-(Hex-)Hex-)Hex-HexNAc-(DeHex-)HexNAc+Hex1	DeHex-HexNAc-Hex-(Hex-Hex-Hex-)Hex-HexNAc-(DeHex-)HexNAc+Hex1
					7720	7711	1270.9	1270.23	3	3807.68	58.41	939.804	TQNFTLLVQGSPELK	-	No	1	0.96	19.89	165.67	0	TRUE	0.19	5-6-1-0-0	1-0-0-0-0	Hex-Hex-(DeHex-HexNAc-)Hex-(Hex-HexNAc-Hex-)Hex-HexNAc-HexNAc+Hex1	Hex-Hex-Hex-(DeHex-HexNAc-)Hex-(HexNAc-Hex-)Hex-HexNAc-HexNAc+Hex1	Hex-Hex-(DeHex-HexNAc-)Hex-(HexNAc-(Hex-)Hex-)Hex-HexNAc-HexNAc+Hex1
					7753	7744	1201.83	1201.83	3	3602.48	58.62	1040.01	DINSQQELQNITTDTR	-	No	0	0.83	21.71	4.42	0	TRUE	10.64	3-6-1-0-0	1-0-0-0-0	Hex-Hex-(Hex-Hex-Hex-)Hex-HexNAc-(DeHex-)HexNAc+Hex1	Hex-Hex-Hex-(Hex-Hex-)Hex-HexNAc-(DeHex-)HexNAc+Hex1	Hex-Hex-Hex-Hex-(Hex-)Hex-HexNAc-(DeHex-)HexNAc+Hex1
					7795	7788	1051.46	1051.46	3	3151.36	58.87	1069.8	LNQTEPVAGNYYPVNTR	-	No	0	0.9	15.71	1.47	0	TRUE	7.05	2-5-0-0-0	0-1-0-0-0	Hex-Hex-(Hex-)Hex-HexNAc-HexNAc+HexNAc1	Hex-(Hex-Hex-)Hex-HexNAc-HexNAc+HexNAc1
					7830	7821	956.104	955.772	3	2864.3	59.09	926.878	HPDAVAWANLTNAIR	-	No	1	0.67	113.82	0.4	0	TRUE	5.97	2-5-0-0-0	0-1-0-0-0	Hex-Hex-(Hex-)Hex-HexNAc-HexNAc+HexNAc1	Hex-(Hex-Hex-)Hex-HexNAc-HexNAc+HexNAc1
					7846	7843	778.368	778.12	4	3108.45	59.19	623.348	RPPLAELAALNLSGSR	-	No	0	0.97	1.77	2.54	0	TRUE	8.33	4-3-1-0-0	1-0-0-0-0	DeHex-HexNAc-Hex-(Hex-)Hex-HexNAc-HexNAc+Hex1
					7861	7854	1061.47	1061.13	3	3180.37	59.28	962.468	VIEEFYNQTWVHR	-	No	0	0.87	14.14	4.39	0	TRUE	0.69	4-4-0-0-0	1-0-0-0-0	HexNAc-(Hex-)Hex-(Hex-)Hex-HexNAc-HexNAc+Hex1	Hex-HexNAc-Hex-(Hex-)Hex-HexNAc-HexNAc+Hex1	HexNAc-Hex-(Hex-Hex-)Hex-HexNAc-HexNAc+Hex1
					7872	7865	1210.22	1210.22	3	3627.63	59.35	1003.44	LSALDNLLNHSSMFLK	-	No	0	0.95	4.13	3.76	-3	TRUE	6.39	5-5-0-0-0	3-0-0-0-0	Hex-Hex-Hex-(Hex-)Hex-HexNAc-HexNAc+Hex3	Hex-Hex-(Hex-Hex-)Hex-HexNAc-HexNAc+Hex3
					7883	7876	1139.87	1139.87	3	3416.57	59.42	1263.08	DIENLKDASSFLAEWQNITK	-	No	0	1	111.05	0	0	TRUE	8.15	3-3-0-0-0	1-0-0-0-0	Hex-(Hex-)Hex-HexNAc-HexNAc+Hex1
					7929	7920	930.115	930.115	3	2787.32	59.7	470.499	IPLVNISLLPK	-	No	0	0.91	0.18	1.05	0	TRUE	3.77	3-6-0-0-0	0-1-0-0-0	Hex-(Hex-)Hex-(HexNAc-Hex-)Hex-HexNAc-HexNAc+HexNAc1	Hex-Hex-(HexNAc-(Hex-)Hex-)Hex-HexNAc-HexNAc+HexNAc1	Hex-Hex-(Hex-HexNAc-Hex-)Hex-HexNAc-HexNAc+HexNAc1
					7993	7986	906.832	906.441	5	4527.17	60.1	838.867	KDGNASGTTLLEALDCILPPTRPTDKPLR	-	No	1	0.67	44.07	0	-3	TRUE	1.62	2-6-0-0-0	0-3-0-0-0	Hex-(Hex-)Hex-HexNAc-HexNAc+HexNAc3
					8050	8041	1109.16	1108.83	3	3323.45	60.44	879.923	SPIVTHCNVSTVNK	-	No	0	0.96	3.02	1.11	0	TRUE	6.91	4-5-1-0-0	1-0-0-0-0	Hex-HexNAc-(Hex-)Hex-(Hex-)Hex-HexNAc-(DeHex-)HexNAc+Hex1	HexNAc-(Hex-Hex-)Hex-(Hex-)Hex-HexNAc-(DeHex-)HexNAc+Hex1	HexNAc-(Hex-)Hex-(Hex-Hex-)Hex-HexNAc-(DeHex-)HexNAc+Hex1	Hex-HexNAc-Hex-(Hex-Hex-)Hex-HexNAc-(DeHex-)HexNAc+Hex1	HexNAc-Hex-(Hex-(Hex-)Hex-)Hex-HexNAc-(DeHex-)HexNAc+Hex1	HexNAc-Hex-(Hex-Hex-Hex-)Hex-HexNAc-(DeHex-)HexNAc+Hex1
					8088	8085	1015.49	1015.15	3	3042.42	60.69	934.918	RPPLAELAALNLSGSR	-	No	1	0.83	115.16	2.16	-1	TRUE	0.64	2-6-0-0-0	0-1-0-0-0	Hex-Hex-Hex-(Hex-)Hex-HexNAc-HexNAc+HexNAc1	Hex-Hex-(Hex-Hex-)Hex-HexNAc-HexNAc+HexNAc1
					8121	8118	1079.16	1078.5	3	3232.47	60.89	470.499	IPLVNISLLPK	-	No	0	0.84	1.93	14.33	0	TRUE	2.49	2-10-0-0-0	0-1-0-0-0	Hex-Hex-Hex-Hex-(Hex-Hex-Hex-Hex-)Hex-HexNAc-HexNAc+HexNAc1	Hex-Hex-Hex-Hex-Hex-Hex-(Hex-Hex-)Hex-HexNAc-HexNAc+HexNAc1	Hex-Hex-Hex-Hex-Hex-Hex-Hex-(Hex-)Hex-HexNAc-HexNAc+HexNAc1	Hex-Hex-Hex-Hex-Hex-(Hex-Hex-Hex-)Hex-HexNAc-HexNAc+HexNAc1
					8134	8129	1130.48	1130.48	4	4517.91	60.97	749.362	HTGPGILSMANAGPNTNGSQFFICTAK	-	No	0	0.89	4.16	66.19	0	TRUE	8.75	3-6-1-0-0	0-1-0-0-0	HexNAc-Hex-(Hex-(Hex-)Hex-)Hex-HexNAc-(DeHex-)HexNAc+HexNAc1	HexNAc-Hex-(Hex-Hex-Hex-)Hex-HexNAc-(DeHex-)HexNAc+HexNAc1	HexNAc-(Hex-)Hex-(Hex-Hex-)Hex-HexNAc-(DeHex-)HexNAc+HexNAc1	HexNAc-(Hex-Hex-)Hex-(Hex-)Hex-HexNAc-(DeHex-)HexNAc+HexNAc1	Hex-HexNAc-(Hex-)Hex-(Hex-)Hex-HexNAc-(DeHex-)HexNAc+HexNAc1	Hex-HexNAc-Hex-(Hex-Hex-)Hex-HexNAc-(DeHex-)HexNAc+HexNAc1
					8193	8184	1072.46	1072.46	3	3214.36	61.34	653.286	GNITEYQCHQYITK	-	No	0	0.97	2.57	0	-3	TRUE	5.54	4-4-0-0-0	2-1-0-0-0	Hex-(Hex-)Hex-HexNAc-HexNAc+Hex2HexNAc1
					8213	8206	811.04	810.709	3	2429.11	61.47	526.949	FNVSLDSVPELR	-	No	0	0.97	2.15	0	0	TRUE	6.73	2-4-0-0-0	0-1-0-0-0	Hex-(Hex-)Hex-HexNAc-HexNAc+HexNAc1
					8229	8228	1023.82	1022.81	3	3065.42	61.57	685.006	LSHDANETLPLHLYVK	-	No	0	0.96	0.73	0.45	0	TRUE	5.97	2-5-0-0-0	0-1-0-0-0	Hex-Hex-(Hex-)Hex-HexNAc-HexNAc+HexNAc1	Hex-(Hex-Hex-)Hex-HexNAc-HexNAc+HexNAc1
					8292	8283	1419.58	1418.91	3	4253.72	61.94	1297.46	TDCDSSTTSLCSFPVANVSLTK	-	No	1	0.86	109.23	7.98	-2	TRUE	0.69	2-9-0-0-0	0-2-0-0-0	Hex-Hex-Hex-Hex-Hex-(Hex-)Hex-HexNAc-HexNAc+HexNAc2	Hex-Hex-Hex-Hex-(Hex-Hex-)Hex-HexNAc-HexNAc+HexNAc2	Hex-Hex-Hex-(Hex-Hex-Hex-)Hex-HexNAc-HexNAc+HexNAc2
					8299	8294	1184.27	1184.02	4	4732.03	61.99	1110.34	LQAALDDEEAGGRPAMEPGNGSLDLGGDSAGR	-	No	1	1	38.64	113.86	0	TRUE	0.52	4-4-1-0-0	1-0-0-0-0	HexNAc-Hex-(Hex-Hex-)Hex-HexNAc-(DeHex-)HexNAc+Hex1	Hex-HexNAc-Hex-(Hex-)Hex-HexNAc-(DeHex-)HexNAc+Hex1	HexNAc-(Hex-)Hex-(Hex-)Hex-HexNAc-(DeHex-)HexNAc+Hex1
					8310	8305	1522.34	1522.01	3	4563.02	62.06	1317.48	IIISPEENVTLTCTAENQLER	-	No	1	0.89	119.06	145.62	-3	TRUE	5.89	5-6-1-0-0	2-1-0-0-0	Hex-HexNAc-(Hex-)Hex-(Hex-)Hex-HexNAc-(DeHex-)HexNAc+Hex2HexNAc1	HexNAc-(Hex-Hex-)Hex-(Hex-)Hex-HexNAc-(DeHex-)HexNAc+Hex2HexNAc1	Hex-HexNAc-Hex-(Hex-Hex-)Hex-HexNAc-(DeHex-)HexNAc+Hex2HexNAc1	HexNAc-Hex-(Hex-(Hex-)Hex-)Hex-HexNAc-(DeHex-)HexNAc+Hex2HexNAc1	HexNAc-Hex-(Hex-Hex-Hex-)Hex-HexNAc-(DeHex-)HexNAc+Hex2HexNAc1	HexNAc-(Hex-)Hex-(Hex-Hex-)Hex-HexNAc-(DeHex-)HexNAc+Hex2HexNAc1
					8314	8305	984.944	984.689	4	3934.73	62.08	744.569	VASVININPNTTHSTGSCR	-	No	0	0.64	27.31	14.97	-3	TRUE	5.71	7-3-0-0-0	3-0-0-0-0	HexNAc-(HexNAc-)Hex-(Hex-)Hex-HexNAc-HexNAc+Hex3	HexNAc-Hex-(HexNAc-Hex-)Hex-HexNAc-HexNAc+Hex3
					8321	8316	1365.57	1365.23	3	4092.66	62.12	1378.79	NRVPDSCCINVTVGCGINFNEK	-	No	1	0.51	36.85	5.68	-2	TRUE	3.88	2-7-0-0-0	0-2-0-0-0	Hex-Hex-Hex-(Hex-)Hex-HexNAc-HexNAc+HexNAc2	Hex-Hex-(Hex-Hex-)Hex-HexNAc-HexNAc+HexNAc2
					8385	8382	1187.22	1186.89	3	3557.65	62.51	470.499	IPLVNISLLPK	-	No	0	0.8	0.12	115.81	-2	TRUE	5.76	4-5-3-1-0	0-0-2-0-0	NeuAc-Hex-HexNAc-(Hex-)Hex-(HexNAc-Hex-)Hex-HexNAc-(DeHex-)HexNAc+DeHex2	Hex-(HexNAc-)Hex-(NeuAc-Hex-HexNAc-Hex-)Hex-HexNAc-(DeHex-)HexNAc+DeHex2	NeuAc-Hex-HexNAc-(HexNAc-)Hex-(Hex-Hex-)Hex-HexNAc-(DeHex-)HexNAc+DeHex2
					8387	8382	1386.95	1386.63	3	4156.86	62.52	1317.43	IIISPEENVTLTCTAENQLER	-	No	1	0.9	124.73	155.64	0	TRUE	5.87	3-6-1-0-0	1-0-0-0-0	Hex-Hex-Hex-Hex-(Hex-)Hex-HexNAc-(DeHex-)HexNAc+Hex1	Hex-Hex-Hex-(Hex-Hex-)Hex-HexNAc-(DeHex-)HexNAc+Hex1	Hex-Hex-(Hex-Hex-Hex-)Hex-HexNAc-(DeHex-)HexNAc+Hex1
					8431	8426	1333.27	1332.61	3	3994.79	62.78	1317.52	IIISPEENVTLTCTAENQLER	-	No	1	1	110.71	160.72	0	TRUE	2.57	3-5-1-0-0	1-0-0-0-0	Hex-Hex-Hex-(Hex-)Hex-HexNAc-(DeHex-)HexNAc+Hex1	Hex-Hex-(Hex-Hex-)Hex-HexNAc-(DeHex-)HexNAc+Hex1
					8484	8481	870.074	869.404	3	2605.19	63.1	463.987	NNVITLNITGK	-	No	0	0.93	0.63	1.73	0	TRUE	4.5	3-5-0-0-0	0-1-0-0-0	Hex-Hex-(HexNAc-Hex-)Hex-HexNAc-HexNAc+HexNAc1
					8504	8503	848.645	848.142	4	3388.54	63.22	487.003	LLHALGGDDFLGMLNR	-	No	0	0.96	2.36	0	-3	TRUE	6.92	5-3-1-0-0	3-0-0-0-0	Hex-(Hex-)Hex-HexNAc-(DeHex-)HexNAc+Hex3
					8510	8503	1260.54	1259.88	3	3776.62	63.25	684.022	NLTHLESLHLEDNALK	-	No	0	0.87	3.2	184.47	0	TRUE	10.28	4-6-1-0-0	0-0-1-0-0	HexNAc-(HexNAc-)Hex-(Hex-Hex-Hex-Hex-)Hex-HexNAc-HexNAc+DeHex1	HexNAc-(Hex-HexNAc-)Hex-(Hex-Hex-Hex-)Hex-HexNAc-HexNAc+DeHex1	HexNAc-(HexNAc-)Hex-(Hex-(Hex-Hex-)Hex-)Hex-HexNAc-HexNAc+DeHex1	HexNAc-(HexNAc-)Hex-(Hex-Hex-(Hex-)Hex-)Hex-HexNAc-HexNAc+DeHex1	HexNAc-(Hex-HexNAc-)Hex-(Hex-(Hex-)Hex-)Hex-HexNAc-HexNAc+DeHex1	Hex-HexNAc-Hex-(HexNAc-(Hex-Hex-)Hex-)Hex-HexNAc-HexNAc+DeHex1	Hex-HexNAc-Hex-(Hex-HexNAc-(Hex-)Hex-)Hex-HexNAc-HexNAc+DeHex1	HexNAc-Hex-HexNAc-Hex-(Hex-Hex-Hex-)Hex-HexNAc-HexNAc+DeHex1	HexNAc-Hex-HexNAc-Hex-(Hex-(Hex-)Hex-)Hex-HexNAc-HexNAc+DeHex1	Hex-HexNAc-Hex-HexNAc-Hex-(Hex-Hex-)Hex-HexNAc-HexNAc+DeHex1	HexNAc-Hex-HexNAc-(Hex-)Hex-(Hex-Hex-)Hex-HexNAc-HexNAc+DeHex1	HexNAc-Hex-HexNAc-(Hex-Hex-)Hex-(Hex-)Hex-HexNAc-HexNAc+DeHex1	Hex-HexNAc-Hex-HexNAc-(Hex-)Hex-(Hex-)Hex-HexNAc-HexNAc+DeHex1	Hex-HexNAc-(HexNAc-)Hex-(Hex-Hex-Hex-)Hex-HexNAc-HexNAc+DeHex1	Hex-HexNAc-(HexNAc-)Hex-(Hex-(Hex-)Hex-)Hex-HexNAc-HexNAc+DeHex1	Hex-HexNAc-(Hex-HexNAc-)Hex-(Hex-Hex-)Hex-HexNAc-HexNAc+DeHex1	HexNAc-(Hex-Hex-)Hex-(Hex-HexNAc-Hex-)Hex-HexNAc-HexNAc+DeHex1	HexNAc-(Hex-)Hex-(HexNAc-(Hex-Hex-)Hex-)Hex-HexNAc-HexNAc+DeHex1	HexNAc-(Hex-)Hex-(Hex-HexNAc-(Hex-)Hex-)Hex-HexNAc-HexNAc+DeHex1	HexNAc-(Hex-Hex-)Hex-(HexNAc-(Hex-)Hex-)Hex-HexNAc-HexNAc+DeHex1	Hex-Hex-(HexNAc-)Hex-(Hex-HexNAc-Hex-)Hex-HexNAc-HexNAc+DeHex1	Hex-Hex-(HexNAc-)Hex-(HexNAc-(Hex-)Hex-)Hex-HexNAc-HexNAc+DeHex1	Hex-Hex-(Hex-HexNAc-)Hex-(HexNAc-Hex-)Hex-HexNAc-HexNAc+DeHex1	Hex-Hex-Hex-(HexNAc-)Hex-(HexNAc-Hex-)Hex-HexNAc-HexNAc+DeHex1	Hex-HexNAc-(Hex-)Hex-(Hex-HexNAc-Hex-)Hex-HexNAc-HexNAc+DeHex1
					8530	8525	878.632	878.382	4	3509.5	63.37	757.063	DIVEYYNDSNGSHVLQGR	-	No	0	0.9	5.86	5.33	0	TRUE	2.78	4-3-1-0-0	0-0-1-0-0	HexNAc-(HexNAc-)Hex-(Hex-)Hex-HexNAc-HexNAc+DeHex1	HexNAc-Hex-(HexNAc-Hex-)Hex-HexNAc-HexNAc+DeHex1
					8543	8536	1224.56	1223.88	3	3668.63	63.45	1003.9	LSALDNLLNHSSMFLK	-	No	0	0.53	15.76	11.37	0	TRUE	1.8	6-4-0-0-0	1-0-0-0-0	HexNAc-(HexNAc-)Hex-(HexNAc-(Hex-)Hex-)Hex-HexNAc-HexNAc+Hex1	HexNAc-(Hex-HexNAc-)Hex-(HexNAc-Hex-)Hex-HexNAc-HexNAc+Hex1	Hex-HexNAc-(HexNAc-)Hex-(HexNAc-Hex-)Hex-HexNAc-HexNAc+Hex1	HexNAc-(HexNAc-)Hex-(Hex-HexNAc-Hex-)Hex-HexNAc-HexNAc+Hex1
					8550	8547	1197.19	1196.85	3	3587.53	63.49	1020.33	ANIQFGDNGTTISAVSNK	-	No	1	0.73	27.85	11.4	0	TRUE	0.48	4-4-0-1-0	0-0-0-1-0	HexNAc-Hex-(Hex-HexNAc-Hex-)Hex-HexNAc-HexNAc+NeuAc1	HexNAc-(Hex-HexNAc-)Hex-(Hex-)Hex-HexNAc-HexNAc+NeuAc1	HexNAc-Hex-(HexNAc-(Hex-)Hex-)Hex-HexNAc-HexNAc+NeuAc1
					8561	8558	1272.5	1272.5	3	3814.47	63.56	878.769	YEQGTGCWQGPNR	-	No	0	0.81	0.41	2.4	-2	TRUE	0.58	5-5-1-1-0	1-0-0-1-0	HexNAc-Hex-Hex-Hex-(HexNAc-Hex-)Hex-HexNAc-(DeHex-)HexNAc+Hex1NeuAc1
					8565	8558	1242.51	1242.19	3	3723.54	63.58	1242.03	VDNITDQFCNASVVDPACVR	-	No	0	0.82	9.03	87.38	0	TRUE	8.39	4-3-1-0-0	1-0-0-0-0	HexNAc-Hex-(Hex-)Hex-HexNAc-(DeHex-)HexNAc+Hex1	Hex-(HexNAc-Hex-)Hex-HexNAc-(DeHex-)HexNAc+Hex1
					8587	8580	1290.53	1289.85	3	3866.54	63.72	1232.88	LGDCISEDSYPDGNITWYR	-	No	0	0.9	7.53	17.84	0	TRUE	7.83	4-4-1-0-0	1-0-0-0-0	HexNAc-Hex-(Hex-Hex-)Hex-HexNAc-(DeHex-)HexNAc+Hex1	Hex-HexNAc-Hex-(Hex-)Hex-HexNAc-(DeHex-)HexNAc+Hex1	HexNAc-(Hex-)Hex-(Hex-)Hex-HexNAc-(DeHex-)HexNAc+Hex1
					8675	8668	1027.43	1027.09	3	3078.26	64.26	769.884	ANNSWFQSILR	-	No	0	0.95	5.08	4.63	-2	TRUE	7.46	3-7-0-0-0	0-2-0-0-0	Hex-HexNAc-(Hex-)Hex-(Hex-)Hex-HexNAc-HexNAc+HexNAc2	HexNAc-(Hex-Hex-)Hex-(Hex-)Hex-HexNAc-HexNAc+HexNAc2	HexNAc-(Hex-)Hex-(Hex-Hex-)Hex-HexNAc-HexNAc+HexNAc2	Hex-HexNAc-Hex-(Hex-Hex-)Hex-HexNAc-HexNAc+HexNAc2	HexNAc-Hex-(Hex-(Hex-)Hex-)Hex-HexNAc-HexNAc+HexNAc2	HexNAc-Hex-(Hex-Hex-Hex-)Hex-HexNAc-HexNAc+HexNAc2
					8677	8668	1236.52	1236.17	3	3705.5	64.28	1063.17	GVLMVGNETTYEDGHGSR	-	No	1	0.55	10.72	102.29	0	TRUE	1.65	4-6-0-0-0	1-0-0-0-0	HexNAc-Hex-Hex-(Hex-)Hex-(Hex-)Hex-HexNAc-HexNAc+Hex1	Hex-HexNAc-Hex-Hex-Hex-(Hex-)Hex-HexNAc-HexNAc+Hex1	Hex-Hex-(Hex-)Hex-(HexNAc-Hex-)Hex-HexNAc-HexNAc+Hex1	Hex-Hex-Hex-(HexNAc-(Hex-)Hex-)Hex-HexNAc-HexNAc+Hex1	Hex-Hex-Hex-(Hex-HexNAc-Hex-)Hex-HexNAc-HexNAc+Hex1
					8715	8712	1089.47	1089.47	3	3265.38	64.53	879.923	SPIVTHCNVSTVNK	-	No	0	0.81	9.71	20.59	0	TRUE	2.09	3-5-0-1-0	0-0-0-1-0	Hex-Hex-Hex-(HexNAc-Hex-)Hex-HexNAc-HexNAc+NeuAc1	HexNAc-Hex-Hex-Hex-(Hex-)Hex-HexNAc-HexNAc+NeuAc1
					8748	8745	1225.84	1225.51	3	3673.52	64.76	1420.25	TVTISDHGTVTYNGSICGDDQNGPK	-	No	0	0.97	6.9	0	0	TRUE	9.84	2-3-1-0-0	0-0-1-0-0	Hex-(Hex-)Hex-HexNAc-HexNAc+DeHex1
					8752	8745	1220.46	1220.21	4	4876.81	64.79	910.107	TNNSTCQPCPYGSYSNGSDCTR	-	No	0	0.77	0.53	1.93	-3	TRUE	0.9	4-5-3-1-0	0-0-2-1-0	HexNAc-Hex-Hex-Hex-(HexNAc-Hex-)Hex-HexNAc-(DeHex-)HexNAc+DeHex2NeuAc1
					8827	8822	1277.18	1277.18	3	3828.52	65.28	719.323	ELAVPDGYTNR	-	No	0	0.8	2.16	60.51	0	TRUE	5.48	4-11-0-0-0	0-1-0-0-0	Hex-Hex-Hex-Hex-Hex-(HexNAc-)Hex-(Hex-(Hex-HexNAc-)Hex-)Hex-HexNAc-HexNAc+HexNAc1	Hex-HexNAc-(Hex-HexNAc-)Hex-(Hex-Hex-Hex-Hex-Hex-Hex-)Hex-HexNAc-HexNAc+HexNAc1	Hex-HexNAc-(Hex-HexNAc-)Hex-(Hex-Hex-(Hex-Hex-Hex-)Hex-)Hex-HexNAc-HexNAc+HexNAc1	Hex-HexNAc-(Hex-HexNAc-)Hex-(Hex-Hex-Hex-(Hex-Hex-)Hex-)Hex-HexNAc-HexNAc+HexNAc1	Hex-HexNAc-(Hex-HexNAc-)Hex-(Hex-Hex-Hex-Hex-(Hex-)Hex-)Hex-HexNAc-HexNAc+HexNAc1	Hex-Hex-Hex-Hex-Hex-(Hex-)Hex-(Hex-HexNAc-(HexNAc-)Hex-)Hex-HexNAc-HexNAc+HexNAc1	Hex-Hex-Hex-Hex-(Hex-Hex-)Hex-(Hex-HexNAc-(HexNAc-)Hex-)Hex-HexNAc-HexNAc+HexNAc1	Hex-Hex-Hex-(Hex-Hex-Hex-)Hex-(Hex-HexNAc-(HexNAc-)Hex-)Hex-HexNAc-HexNAc+HexNAc1	Hex-Hex-Hex-Hex-(Hex-HexNAc-)Hex-(Hex-(Hex-HexNAc-)Hex-)Hex-HexNAc-HexNAc+HexNAc1	Hex-Hex-Hex-Hex-Hex-(Hex-HexNAc-)Hex-(Hex-(HexNAc-)Hex-)Hex-HexNAc-HexNAc+HexNAc1	Hex-Hex-Hex-Hex-Hex-Hex-Hex-(HexNAc-(Hex-HexNAc-)Hex-)Hex-HexNAc-HexNAc+HexNAc1	Hex-Hex-Hex-Hex-Hex-Hex-Hex-Hex-(HexNAc-(HexNAc-)Hex-)Hex-HexNAc-HexNAc+HexNAc1	Hex-Hex-Hex-(Hex-Hex-Hex-)Hex-(HexNAc-(Hex-HexNAc-)Hex-)Hex-HexNAc-HexNAc+HexNAc1	Hex-Hex-Hex-(Hex-Hex-Hex-Hex-)Hex-(HexNAc-(HexNAc-)Hex-)Hex-HexNAc-HexNAc+HexNAc1	Hex-Hex-Hex-Hex-(Hex-)Hex-(Hex-HexNAc-(Hex-HexNAc-)Hex-)Hex-HexNAc-HexNAc+HexNAc1	Hex-Hex-Hex-Hex-(Hex-Hex-)Hex-(HexNAc-(Hex-HexNAc-)Hex-)Hex-HexNAc-HexNAc+HexNAc1	Hex-Hex-Hex-Hex-Hex-(Hex-)Hex-(HexNAc-(Hex-HexNAc-)Hex-)Hex-HexNAc-HexNAc+HexNAc1	Hex-Hex-Hex-Hex-Hex-(Hex-Hex-)Hex-(HexNAc-(HexNAc-)Hex-)Hex-HexNAc-HexNAc+HexNAc1	Hex-Hex-Hex-Hex-Hex-Hex-(Hex-)Hex-(HexNAc-(HexNAc-)Hex-)Hex-HexNAc-HexNAc+HexNAc1	Hex-Hex-Hex-Hex-Hex-Hex-(Hex-HexNAc-(Hex-HexNAc-)Hex-)Hex-HexNAc-HexNAc+HexNAc1	Hex-Hex-Hex-Hex-Hex-Hex-Hex-(Hex-HexNAc-(HexNAc-)Hex-)Hex-HexNAc-HexNAc+HexNAc1	Hex-Hex-(Hex-Hex-Hex-)Hex-(Hex-HexNAc-(Hex-HexNAc-)Hex-)Hex-HexNAc-HexNAc+HexNAc1	Hex-Hex-Hex-(Hex-Hex-)Hex-(Hex-HexNAc-(Hex-HexNAc-)Hex-)Hex-HexNAc-HexNAc+HexNAc1	Hex-Hex-Hex-Hex-(Hex-Hex-Hex-)Hex-(HexNAc-(HexNAc-)Hex-)Hex-HexNAc-HexNAc+HexNAc1	Hex-Hex-Hex-Hex-Hex-Hex-(HexNAc-)Hex-(Hex-(HexNAc-)Hex-)Hex-HexNAc-HexNAc+HexNAc1
					8878	8877	893.648	893.395	4	3569.55	65.61	636.27	AFGQFFSPGEVIYNK	-	No	0	0.94	1.72	0.92	-3	TRUE	5.75	6-4-0-0-0	3-0-0-0-0	Hex-Hex-(HexNAc-Hex-)Hex-HexNAc-HexNAc+Hex3
					9012	9009	1219.52	1219.18	3	3654.52	66.49	899.619	EAGNHTSGAGLVQINK	-	No	1	0.74	9.92	184.12	0	TRUE	6.01	4-5-1-1-0	1-0-0-0-0	NeuAc-Hex-HexNAc-Hex-(Hex-Hex-)Hex-HexNAc-(DeHex-)HexNAc+Hex1	NeuAc-Hex-HexNAc-(Hex-)Hex-(Hex-)Hex-HexNAc-(DeHex-)HexNAc+Hex1
					9014	9009	856.372	856.033	3	2565.08	66.51	654.661	ENATTDLLTK	-	No	0	0.96	64.29	9.92	0	TRUE	8.19	4-4-0-0-0	1-0-0-0-0	Hex-Hex-(HexNAc-Hex-)Hex-HexNAc-HexNAc+Hex1
					9093	9086	959.449	959.449	4	3833.77	67.03	762.579	TNITLVCKPGDLESAPVLR	-	No	0	0.77	15.96	7.94	0	TRUE	5.41	4-4-0-1-0	0-0-0-1-0	HexNAc-Hex-(Hex-HexNAc-Hex-)Hex-HexNAc-HexNAc+NeuAc1	HexNAc-Hex-(HexNAc-(Hex-)Hex-)Hex-HexNAc-HexNAc+NeuAc1	HexNAc-(Hex-HexNAc-)Hex-(Hex-)Hex-HexNAc-HexNAc+NeuAc1
					9100	9097	1129.51	1129.17	3	3384.49	67.08	939.806	TQNFTLLVQGSPELK	-	No	0	0.75	36.23	41.01	0	TRUE	4.69	3-5-0-1-0	0-0-0-1-0	Hex-Hex-(Hex-HexNAc-Hex-)Hex-HexNAc-HexNAc+NeuAc1	Hex-Hex-(HexNAc-(Hex-)Hex-)Hex-HexNAc-HexNAc+NeuAc1	Hex-(Hex-)Hex-(HexNAc-Hex-)Hex-HexNAc-HexNAc+NeuAc1
					9137	9130	1423.96	1423.62	3	4267.85	67.33	1263.08	DIENLKDASSFLAEWQNITK	-	No	0	0.79	6.68	4.44	-2	TRUE	3.32	4-7-0-0-0	0-2-0-0-0	HexNAc-Hex-HexNAc-(Hex-)Hex-(Hex-)Hex-HexNAc-HexNAc+HexNAc2	Hex-HexNAc-(Hex-)Hex-(HexNAc-Hex-)Hex-HexNAc-HexNAc+HexNAc2	HexNAc-Hex-Hex-(HexNAc-)Hex-(Hex-)Hex-HexNAc-HexNAc+HexNAc2	Hex-Hex-(HexNAc-)Hex-(HexNAc-Hex-)Hex-HexNAc-HexNAc+HexNAc2	HexNAc-Hex-HexNAc-Hex-(Hex-Hex-)Hex-HexNAc-HexNAc+HexNAc2	HexNAc-Hex-Hex-Hex-(HexNAc-Hex-)Hex-HexNAc-HexNAc+HexNAc2
					9164	9163	1068.48	1067.97	4	4267.87	67.49	842.391	DIENLKDASSFLAEWQNITK	-	No	0	0.63	16.43	148.94	-3	TRUE	8.92	4-7-0-0-0	0-3-0-0-0	HexNAc-Hex-(Hex-HexNAc-Hex-)Hex-HexNAc-HexNAc+HexNAc3	HexNAc-(Hex-HexNAc-)Hex-(Hex-)Hex-HexNAc-HexNAc+HexNAc3	HexNAc-Hex-(HexNAc-(Hex-)Hex-)Hex-HexNAc-HexNAc+HexNAc3
					9188	9185	888.205	888	5	4434.96	67.64	542.496	AHCVWLECPIPDAPVVTNVTVK	-	No	0	0.64	1.96	102.67	-3	TRUE	0.99	4-6-1-0-0	0-3-0-0-0	HexNAc-(HexNAc-)Hex-(Hex-)Hex-HexNAc-(DeHex-)HexNAc+HexNAc3	HexNAc-Hex-(HexNAc-Hex-)Hex-HexNAc-(DeHex-)HexNAc+HexNAc3
					9241	9240	785.609	785.359	4	3137.41	67.97	646.665	LDMSQNVSLVTAELSK	-	No	0	0.98	102.31	26.4	0	TRUE	1.01	3-4-1-0-0	0-0-1-0-0	HexNAc-Hex-(Hex-Hex-)Hex-HexNAc-HexNAc+DeHex1	Hex-HexNAc-Hex-(Hex-)Hex-HexNAc-HexNAc+DeHex1	HexNAc-(Hex-)Hex-(Hex-)Hex-HexNAc-HexNAc+DeHex1
					9245	9240	952.418	951.92	4	3803.65	67.99	863.407	TPLVQEVHQNFSAWCSQVVR	-	No	1	0.71	78.8	127.29	0	TRUE	6.93	3-5-0-0-0	0-1-0-0-0	HexNAc-Hex-(Hex-Hex-)Hex-HexNAc-HexNAc+HexNAc1	Hex-HexNAc-Hex-(Hex-)Hex-HexNAc-HexNAc+HexNAc1	HexNAc-(Hex-)Hex-(Hex-)Hex-HexNAc-HexNAc+HexNAc1
					9302	9295	1238.91	1238.24	3	3711.7	68.36	1106.08	DHNATSILQQLPLLSAMR	-	No	0	0.81	8.27	3.97	0	TRUE	1.58	6-3-0-0-0	1-0-0-0-0	HexNAc-(HexNAc-)Hex-(HexNAc-Hex-)Hex-HexNAc-HexNAc+Hex1	HexNAc-Hex-(HexNAc-(HexNAc-)Hex-)Hex-HexNAc-HexNAc+Hex1
					9311	9306	939.447	939.113	3	2814.32	68.41	592.974	GVFITNETGQPLIGK	-	No	0	0.91	0.2	0.15	0	TRUE	2.08	3-3-1-0-0	0-0-1-0-0	HexNAc-Hex-(Hex-)Hex-HexNAc-HexNAc+DeHex1	Hex-(HexNAc-Hex-)Hex-HexNAc-HexNAc+DeHex1
					9313	9306	858.727	858.398	3	2572.17	68.42	376.693	LLNINPNK	-	No	0	0.96	0.24	0	-3	TRUE	6.07	5-3-1-0-0	3-0-0-0-0	Hex-(Hex-)Hex-HexNAc-(DeHex-)HexNAc+Hex3
					9324	9317	1357.79	1357.04	4	5424.14	68.49	1341.23	FDEWDELPHGFASLSANMELDDSAAESTGNCTSSK	-	No	0	0.68	30.49	17.21	0	TRUE	9.72	4-4-1-0-0	0-1-0-0-0	HexNAc-(HexNAc-)Hex-(Hex-)Hex-HexNAc-(DeHex-)HexNAc+HexNAc1	HexNAc-Hex-(HexNAc-Hex-)Hex-HexNAc-(DeHex-)HexNAc+HexNAc1
					9362	9361	1296.55	1296.22	3	3885.65	68.73	1242.03	VDNITDQFCNASVVDPACVR	-	No	0	0.59	5.86	8.03	0	TRUE	8.17	4-4-1-0-0	0-0-1-0-0	HexNAc-Hex-(Hex-HexNAc-Hex-)Hex-HexNAc-HexNAc+DeHex1	HexNAc-Hex-(HexNAc-(Hex-)Hex-)Hex-HexNAc-HexNAc+DeHex1	Hex-HexNAc-Hex-(HexNAc-Hex-)Hex-HexNAc-HexNAc+DeHex1	HexNAc-(Hex-)Hex-(HexNAc-Hex-)Hex-HexNAc-HexNAc+DeHex1	HexNAc-(HexNAc-)Hex-(Hex-Hex-)Hex-HexNAc-HexNAc+DeHex1	HexNAc-(Hex-HexNAc-)Hex-(Hex-)Hex-HexNAc-HexNAc+DeHex1	Hex-HexNAc-(HexNAc-)Hex-(Hex-)Hex-HexNAc-HexNAc+DeHex1
					9364	9361	1258.2	1257.53	3	3769.58	68.74	899.619	EAGNHTSGAGLVQINK	-	No	0	0.95	2.2	8.24	-2	TRUE	7.25	6-5-1-0-0	1-1-0-0-0	Hex-(HexNAc-)Hex-(HexNAc-(HexNAc-)Hex-)Hex-HexNAc-(DeHex-)HexNAc+Hex1HexNAc1	HexNAc-(HexNAc-)Hex-(Hex-(HexNAc-)Hex-)Hex-HexNAc-(DeHex-)HexNAc+Hex1HexNAc1
					9417	9416	687.334	687.132	5	3430.62	69.07	635.533	ILAPAYFILGGNQSGEGCVITR	-	No	0	0.94	5.57	0	-1	TRUE	5.91	3-3-0-0-0	1-0-0-0-0	Hex-(Hex-)Hex-HexNAc-HexNAc+Hex1
					9463	9460	1183.18	1182.52	3	3544.55	69.38	701.109	TILVDNNTWNNTHISR	-	No	0	0.93	3.45	0	-3	TRUE	4.82	5-3-1-0-0	3-0-0-0-0	Hex-(Hex-)Hex-HexNAc-(DeHex-)HexNAc+Hex3
					9487	9482	965.436	965.436	3	2893.28	69.55	941.293	NGIYNITVLASDQGGR	-	No	1	0.8	114.53	1.11	0	TRUE	2.19	2-5-0-0-0	0-1-0-0-0	Hex-Hex-(Hex-)Hex-HexNAc-HexNAc+HexNAc1	Hex-(Hex-Hex-)Hex-HexNAc-HexNAc+HexNAc1
					9553	9548	1261.58	1261.23	3	3780.68	70.02	1385.07	DLQGNPIANATISVEGIDHDVTSAK	-	No	1	0.65	103.74	0.43	0	TRUE	6.78	2-5-0-0-0	0-1-0-0-0	Hex-Hex-(Hex-)Hex-HexNAc-HexNAc+HexNAc1	Hex-(Hex-Hex-)Hex-HexNAc-HexNAc+HexNAc1
					9568	9559	1221.54	1221.54	3	3661.59	70.12	1020.43	ANIQFGDNGTTISAVSNK	-	No	1	0.77	31.89	44.05	0	TRUE	6.13	5-5-0-0-0	1-0-0-0-0	Hex-(HexNAc-)Hex-(Hex-HexNAc-Hex-)Hex-HexNAc-HexNAc+Hex1	Hex-HexNAc-(Hex-)Hex-(HexNAc-Hex-)Hex-HexNAc-HexNAc+Hex1	HexNAc-(Hex-Hex-)Hex-(HexNAc-Hex-)Hex-HexNAc-HexNAc+Hex1	HexNAc-(Hex-)Hex-(HexNAc-(Hex-)Hex-)Hex-HexNAc-HexNAc+Hex1	HexNAc-(Hex-)Hex-(Hex-HexNAc-Hex-)Hex-HexNAc-HexNAc+Hex1	Hex-HexNAc-(Hex-HexNAc-)Hex-(Hex-)Hex-HexNAc-HexNAc+Hex1	Hex-HexNAc-(HexNAc-)Hex-(Hex-Hex-)Hex-HexNAc-HexNAc+Hex1	HexNAc-Hex-HexNAc-(Hex-)Hex-(Hex-)Hex-HexNAc-HexNAc+Hex1	Hex-HexNAc-Hex-HexNAc-Hex-(Hex-)Hex-HexNAc-HexNAc+Hex1	Hex-HexNAc-Hex-(HexNAc-(Hex-)Hex-)Hex-HexNAc-HexNAc+Hex1	Hex-HexNAc-Hex-(Hex-HexNAc-Hex-)Hex-HexNAc-HexNAc+Hex1	HexNAc-(Hex-HexNAc-)Hex-(Hex-Hex-)Hex-HexNAc-HexNAc+Hex1	HexNAc-(HexNAc-)Hex-(Hex-(Hex-)Hex-)Hex-HexNAc-HexNAc+Hex1	HexNAc-(HexNAc-)Hex-(Hex-Hex-Hex-)Hex-HexNAc-HexNAc+Hex1	Hex-Hex-(HexNAc-)Hex-(HexNAc-Hex-)Hex-HexNAc-HexNAc+Hex1	Hex-(Hex-HexNAc-)Hex-(HexNAc-Hex-)Hex-HexNAc-HexNAc+Hex1	HexNAc-Hex-HexNAc-Hex-(Hex-Hex-)Hex-HexNAc-HexNAc+Hex1	Hex-(HexNAc-)Hex-(HexNAc-(Hex-)Hex-)Hex-HexNAc-HexNAc+Hex1
					9621	9614	941.413	941.17	4	3760.65	70.49	683.862	NLTHLESLHLEDNALK	-	No	0	0.88	13.58	34.26	-2	TRUE	3.18	4-5-2-0-0	0-2-0-0-0	DeHex-HexNAc-(DeHex-HexNAc-)Hex-(Hex-)Hex-HexNAc-HexNAc+HexNAc2	DeHex-HexNAc-Hex-(DeHex-HexNAc-Hex-)Hex-HexNAc-HexNAc+HexNAc2
					9696	9691	1205.5	1205	2	2407.99	71.01	678.09	YIDQEELNK	-	No	0	0.96	17.95	0	-2	TRUE	7.91	3-4-0-0-0	1-1-0-0-0	Hex-(Hex-)Hex-HexNAc-HexNAc+Hex1HexNAc1
					9722	9713	951.173	950.918	4	3799.64	71.19	691.378	TVTNTTVEDETETNEVQGFLFGK	-	No	0	0.92	2.38	0.97	0	TRUE	1.16	3-3-1-0-0	0-0-1-0-0	HexNAc-Hex-(Hex-)Hex-HexNAc-HexNAc+DeHex1	Hex-(HexNAc-Hex-)Hex-HexNAc-HexNAc+DeHex1
					9923	9922	979.925	979.675	4	3914.67	72.6	940.979	DYNSSREDSLQDAWDYVQAQVK	-	No	0	0.85	26.82	3.15	0	TRUE	3.74	4-3-0-0-0	1-0-0-0-0	HexNAc-Hex-(Hex-)Hex-HexNAc-HexNAc+Hex1	Hex-(HexNAc-Hex-)Hex-HexNAc-HexNAc+Hex1
					9953	9944	1330.59	1330.59	4	5318.33	72.81	1197.92	SPSVDKYNVSGTNGTCLLASMGLQLNLTYER	-	No	0	0.62	3.62	140.37	-2	TRUE	3.31	4-6-1-0-0	1-1-0-0-0	Hex-(DeHex-)HexNAc-(Hex-)Hex-(Hex-)Hex-HexNAc-HexNAc+Hex1HexNAc1	Hex-(DeHex-)HexNAc-Hex-(Hex-Hex-)Hex-HexNAc-HexNAc+Hex1HexNAc1
					10079	10076	934.426	934.084	3	2799.23	73.7	654.661	AAENFTLLVK	-	No	0	0.87	3.12	4.93	0	TRUE	1.74	3-4-1-1-0	0-0-0-1-0	Hex-Hex-(HexNAc-Hex-)Hex-HexNAc-(DeHex-)HexNAc+NeuAc1
					10107	10098	1577.65	1577.32	3	4728.93	73.9	935.132	DNATEEEILVYLEK	-	No	0	0.94	28.75	229.95	-3	TRUE	5.68	6-6-0-3-0	0-1-0-2-0	NeuAc-Hex-HexNAc-(HexNAc-Hex-HexNAc-)Hex-(HexNAc-Hex-)Hex-HexNAc-HexNAc+HexNAc1NeuAc2
					10132	10131	936.091	935.756	3	2804.24	74.07	454.219	NPNGTVTVISR	-	No	0	0.92	3.69	0	-3	TRUE	2.35	5-3-1-0-0	3-0-0-0-0	Hex-(Hex-)Hex-HexNAc-(DeHex-)HexNAc+Hex3
					10147	10142	1130.17	1129.83	3	3386.46	74.17	1025.87	NLTHLESLHLEDNALK	-	No	0	0.6	51.26	40.37	0	TRUE	10.38	2-7-0-0-0	0-1-0-0-0	Hex-Hex-Hex-Hex-(Hex-)Hex-HexNAc-HexNAc+HexNAc1	Hex-Hex-Hex-(Hex-Hex-)Hex-HexNAc-HexNAc+HexNAc1	Hex-Hex-(Hex-Hex-Hex-)Hex-HexNAc-HexNAc+HexNAc1
					10173	10164	1049.72	1049.47	4	4193.85	74.35	749.451	HTGPGILSMANAGPNTNGSQFFICTAK	-	No	0	0.68	15.62	36.57	0	TRUE	1.63	3-4-1-0-0	0-0-1-0-0	HexNAc-Hex-(Hex-Hex-)Hex-HexNAc-HexNAc+DeHex1	Hex-HexNAc-Hex-(Hex-)Hex-HexNAc-HexNAc+DeHex1	HexNAc-(Hex-)Hex-(Hex-)Hex-HexNAc-HexNAc+DeHex1
					10191	10186	1022.48	1021.48	3	3061.41	74.47	737.722	DHNATSILQQLPLLSAMR	-	No	0	0.9	20.92	0	0	TRUE	7.66	2-4-0-0-0	0-1-0-0-0	Hex-(Hex-)Hex-HexNAc-HexNAc+HexNAc1
					10193	10186	1487.28	1486.62	3	4456.84	74.48	972.938	LLHALGGDDFLGMLNR	-	No	1	0.99	54.58	103.93	-3	TRUE	6.57	5-6-1-2-0	1-1-1-0-0	NeuAc-Hex-HexNAc-(NeuAc-Hex-HexNAc-)Hex-(Hex-)Hex-HexNAc-HexNAc+Hex1HexNAc1DeHex1	NeuAc-Hex-HexNAc-Hex-(NeuAc-Hex-HexNAc-Hex-)Hex-HexNAc-HexNAc+Hex1HexNAc1DeHex1
					10198	10197	766.861	766.611	4	3062.41	74.51	470.627	IPLVNISLLPK	-	No	0	0.94	4.16	7.01	0	TRUE	6.86	3-5-1-1-0	0-0-1-0-0	NeuAc-Hex-HexNAc-Hex-(Hex-Hex-)Hex-HexNAc-HexNAc+DeHex1
					10248	10241	1427.61	1427.61	3	4279.79	74.86	1411.02	DYNSSREDSLQDAWDYVQAQVK	-	No	0	0.81	5.96	1.88	-2	TRUE	0.91	5-4-0-0-0	2-0-0-0-0	Hex-Hex-(HexNAc-Hex-)Hex-HexNAc-HexNAc+Hex2
					10310	10307	1457.25	1456.59	3	4366.74	75.27	1337.1	NGTNDGDYVFLTGEDSYLNFTK	-	No	0	0.57	21.91	67.33	-2	TRUE	9.06	4-4-1-1-0	1-0-0-1-0	HexNAc-Hex-(Hex-Hex-)Hex-HexNAc-(DeHex-)HexNAc+Hex1NeuAc1	Hex-HexNAc-Hex-(Hex-)Hex-HexNAc-(DeHex-)HexNAc+Hex1NeuAc1	HexNAc-(Hex-)Hex-(Hex-)Hex-HexNAc-(DeHex-)HexNAc+Hex1NeuAc1
					10316	10307	1454.59	1454.26	3	4359.75	75.31	1411.02	DYNSSREDSLQDAWDYVQAQVK	-	No	0	0.94	6.82	6.7	-2	TRUE	8.18	3-7-0-0-0	1-1-0-0-0	Hex-Hex-Hex-Hex-(Hex-)Hex-HexNAc-HexNAc+Hex1HexNAc1	Hex-Hex-Hex-(Hex-Hex-)Hex-HexNAc-HexNAc+Hex1HexNAc1	Hex-Hex-(Hex-Hex-Hex-)Hex-HexNAc-HexNAc+Hex1HexNAc1
					10325	10318	1190.97	1190.47	4	4757.85	75.37	1071.04	DVDECALGTHNCSEAETCHNIQGSFR	-	No	1	0.66	45.16	99.72	0	TRUE	0.62	4-4-0-1-0	0-0-0-1-0	HexNAc-Hex-(Hex-HexNAc-Hex-)Hex-HexNAc-HexNAc+NeuAc1	HexNAc-(Hex-HexNAc-)Hex-(Hex-)Hex-HexNAc-HexNAc+NeuAc1	HexNAc-Hex-(HexNAc-(Hex-)Hex-)Hex-HexNAc-HexNAc+NeuAc1
					10327	10318	1258.57	1258.23	3	3771.68	75.38	1056.45	NVTTVLNDPNPIWLVGR	-	No	1	0.7	158.59	38.61	0	TRUE	6.28	2-9-0-0-0	0-1-0-0-0	Hex-Hex-Hex-Hex-Hex-Hex-(Hex-)Hex-HexNAc-HexNAc+HexNAc1	Hex-Hex-Hex-Hex-Hex-(Hex-Hex-)Hex-HexNAc-HexNAc+HexNAc1	Hex-Hex-Hex-Hex-(Hex-Hex-Hex-)Hex-HexNAc-HexNAc+HexNAc1	Hex-Hex-Hex-(Hex-Hex-Hex-Hex-)Hex-HexNAc-HexNAc+HexNAc1
					10457	10450	1066.48	1066.13	3	3195.38	76.26	844.714	NNQLALTLIDTNR	-	No	0	0.81	14.57	4.66	0	TRUE	6.42	3-5-0-1-0	0-0-0-1-0	Hex-(Hex-)Hex-(HexNAc-Hex-)Hex-HexNAc-HexNAc+NeuAc1	Hex-Hex-(Hex-HexNAc-Hex-)Hex-HexNAc-HexNAc+NeuAc1	Hex-Hex-(HexNAc-(Hex-)Hex-)Hex-HexNAc-HexNAc+NeuAc1	Hex-Hex-Hex-(HexNAc-Hex-)Hex-HexNAc-HexNAc+NeuAc1
					10521	10516	1002.16	1001.4	4	4001.58	76.71	1056.55	FPDEEGACQPCPINCTHSCVDLDDK	-	No	0	0.59	49.25	0	0	TRUE	2.01	2-3-1-0-0	0-0-1-0-0	Hex-(Hex-)Hex-HexNAc-HexNAc+DeHex1
					10558	10549	1202.23	1201.89	3	3602.64	76.98	1384.46	DLQGNPIANATISVEGIDHDVTSAK	-	No	0	0.8	38.99	0	0	TRUE	5.08	2-3-1-0-0	0-0-1-0-0	Hex-(Hex-)Hex-HexNAc-HexNAc+DeHex1
					10651	10648	921.421	921.421	3	2761.24	77.66	643.089	IVSPEPGGAVGPNLTCR	-	No	0	0.92	19.75	0	0	TRUE	4.95	2-3-1-0-0	0-0-1-0-0	Hex-(Hex-)Hex-HexNAc-HexNAc+DeHex1
					10677	10670	830.72	830.387	3	2488.14	77.86	819.378	DITDLINNTFIR	-	No	0	0.65	23.71	0	0	TRUE	4.32	2-4-0-0-0	0-1-0-0-0	Hex-(Hex-)Hex-HexNAc-HexNAc+HexNAc1
					10701	10692	1346.23	1346.23	3	4035.68	78.05	1329.6	DATGNVNDTIVTELTNCTSAACK	-	No	1	0.6	32.48	91.91	0	TRUE	3.63	3-6-0-0-0	1-0-0-0-0	Hex-Hex-Hex-Hex-(Hex-)Hex-HexNAc-HexNAc+Hex1	Hex-Hex-Hex-(Hex-Hex-)Hex-HexNAc-HexNAc+Hex1	Hex-Hex-(Hex-Hex-Hex-)Hex-HexNAc-HexNAc+Hex1
					10840	10835	1182.2	1181.87	3	3542.6	79.14	945.846	TALFPDLLAQGNASLR	-	No	1	0.98	93.37	133.7	0	TRUE	6.68	3-5-1-1-0	0-0-0-1-0	Hex-(Hex-)Hex-(HexNAc-Hex-)Hex-HexNAc-(DeHex-)HexNAc+NeuAc1	Hex-Hex-(HexNAc-(Hex-)Hex-)Hex-HexNAc-(DeHex-)HexNAc+NeuAc1	Hex-Hex-(Hex-HexNAc-Hex-)Hex-HexNAc-(DeHex-)HexNAc+NeuAc1
					10853	10846	856.044	855.714	3	2564.12	79.25	763.693	IVNETLYENTK	-	No	0	0.56	30.11	3.3	0	TRUE	4.38	3-3-1-0-0	0-0-1-0-0	HexNAc-Hex-(Hex-)Hex-HexNAc-HexNAc+DeHex1	Hex-(HexNAc-Hex-)Hex-HexNAc-HexNAc+DeHex1
					10877	10868	1201.53	1201.53	3	3601.57	79.44	845.104	NNQLALTLIDTNR	-	No	1	0.63	30.64	126.49	0	TRUE	4.75	5-5-0-1-0	0-0-0-1-0	Hex-HexNAc-Hex-HexNAc-Hex-(HexNAc-Hex-)Hex-HexNAc-HexNAc+NeuAc1	HexNAc-Hex-HexNAc-Hex-HexNAc-Hex-(Hex-)Hex-HexNAc-HexNAc+NeuAc1	Hex-HexNAc-Hex-HexNAc-(HexNAc-)Hex-(Hex-)Hex-HexNAc-HexNAc+NeuAc1	Hex-HexNAc-(HexNAc-)Hex-(Hex-(HexNAc-)Hex-)Hex-HexNAc-HexNAc+NeuAc1	Hex-HexNAc-(Hex-HexNAc-)Hex-(HexNAc-Hex-)Hex-HexNAc-HexNAc+NeuAc1	Hex-HexNAc-(HexNAc-Hex-HexNAc-)Hex-(Hex-)Hex-HexNAc-HexNAc+NeuAc1	HexNAc-Hex-HexNAc-(Hex-HexNAc-)Hex-(Hex-)Hex-HexNAc-HexNAc+NeuAc1	HexNAc-(Hex-)Hex-(Hex-HexNAc-(HexNAc-)Hex-)Hex-HexNAc-HexNAc+NeuAc1	HexNAc-(Hex-)Hex-(HexNAc-Hex-HexNAc-Hex-)Hex-HexNAc-HexNAc+NeuAc1	Hex-HexNAc-(HexNAc-)Hex-(HexNAc-(Hex-)Hex-)Hex-HexNAc-HexNAc+NeuAc1	HexNAc-Hex-HexNAc-Hex-(Hex-HexNAc-Hex-)Hex-HexNAc-HexNAc+NeuAc1	Hex-HexNAc-(HexNAc-)Hex-(Hex-HexNAc-Hex-)Hex-HexNAc-HexNAc+NeuAc1	Hex-(HexNAc-)Hex-(HexNAc-Hex-HexNAc-Hex-)Hex-HexNAc-HexNAc+NeuAc1	HexNAc-(HexNAc-)Hex-(Hex-Hex-(HexNAc-)Hex-)Hex-HexNAc-HexNAc+NeuAc1	Hex-HexNAc-Hex-(HexNAc-Hex-HexNAc-Hex-)Hex-HexNAc-HexNAc+NeuAc1	Hex-HexNAc-Hex-(Hex-HexNAc-(HexNAc-)Hex-)Hex-HexNAc-HexNAc+NeuAc1	HexNAc-Hex-HexNAc-Hex-(HexNAc-(Hex-)Hex-)Hex-HexNAc-HexNAc+NeuAc1	Hex-(HexNAc-)Hex-(Hex-HexNAc-(HexNAc-)Hex-)Hex-HexNAc-HexNAc+NeuAc1
					10886	10879	1115.47	1115.13	3	3342.37	79.51	816.698	VWNSTFIEDYR	-	No	0	0.64	14.77	96.15	0	TRUE	7.52	4-5-0-1-0	1-0-0-0-0	NeuAc-Hex-HexNAc-Hex-(Hex-Hex-)Hex-HexNAc-HexNAc+Hex1	NeuAc-Hex-HexNAc-(Hex-)Hex-(Hex-)Hex-HexNAc-HexNAc+Hex1
					10954	10945	1275.27	1274.92	3	3821.74	80.06	1384.64	DLQGNPIANATISVEGIDHDVTSAK	-	No	0	0.83	28.61	0.67	0	TRUE	1.85	3-4-0-0-0	1-0-0-0-0	Hex-Hex-(Hex-)Hex-HexNAc-HexNAc+Hex1	Hex-(Hex-Hex-)Hex-HexNAc-HexNAc+Hex1
					10987	10978	976.082	975.41	3	2923.21	80.32	793.529	WHPQNSTSIWK	-	No	1	0.86	63.41	9.1	-3	TRUE	2.34	2-7-0-0-0	0-3-0-0-0	Hex-Hex-(Hex-)Hex-HexNAc-HexNAc+HexNAc3	Hex-(Hex-Hex-)Hex-HexNAc-HexNAc+HexNAc3
					11025	11022	1290.52	1290.28	4	5157.09	80.62	1260.62	EGFYLNYTSGLCQPCDCSPHGALSIPCNSSGK	-	No	1	0.55	27.55	54.07	0	TRUE	6.34	3-6-0-0-0	1-0-0-0-0	Hex-Hex-Hex-Hex-(Hex-)Hex-HexNAc-HexNAc+Hex1	Hex-Hex-Hex-(Hex-Hex-)Hex-HexNAc-HexNAc+Hex1	Hex-Hex-(Hex-Hex-Hex-)Hex-HexNAc-HexNAc+Hex1
					11075	11066	791.108	790.858	4	3159.4	81.03	634.996	GPLANPIWNVTGFTGR	-	No	1	0.7	121.29	5.41	-2	TRUE	4.56	4-4-0-0-0	2-0-0-0-0	Hex-Hex-(Hex-)Hex-HexNAc-HexNAc+Hex2	Hex-(Hex-Hex-)Hex-HexNAc-HexNAc+Hex2
					11102	11099	1317.78	1317.78	4	5267.07	81.26	1056.55	FPDEEGACQPCPINCTHSCVDLDDK	-	No	1	0.7	55.29	223.67	0	TRUE	6.4	6-4-1-1-0	0-0-0-1-0	HexNAc-(HexNAc-)Hex-(HexNAc-Hex-HexNAc-Hex-)Hex-HexNAc-(DeHex-)HexNAc+NeuAc1	HexNAc-(HexNAc-)Hex-(Hex-HexNAc-(HexNAc-)Hex-)Hex-HexNAc-(DeHex-)HexNAc+NeuAc1
					11348	11341	1021.71	1021.2	4	4080.78	83.28	646.329	DLNGNVFQDAVFNQTVTVIER	-	No	1	0.57	52.59	70.76	0	TRUE	1.68	2-8-0-0-0	0-1-0-0-0	Hex-Hex-Hex-Hex-Hex-(Hex-)Hex-HexNAc-HexNAc+HexNAc1	Hex-Hex-Hex-Hex-(Hex-Hex-)Hex-HexNAc-HexNAc+HexNAc1	Hex-Hex-Hex-(Hex-Hex-Hex-)Hex-HexNAc-HexNAc+HexNAc1
					11480	11473	1220.23	1220.23	4	4876.89	84.32	1056.55	FPDEEGACQPCPINCTHSCVDLDDK	-	No	1	0.91	37.77	195.93	0	TRUE	4.1	4-5-0-1-0	0-0-0-1-0	Hex-(Hex-HexNAc-)Hex-(HexNAc-Hex-)Hex-HexNAc-HexNAc+NeuAc1	Hex-(HexNAc-)Hex-(HexNAc-(Hex-)Hex-)Hex-HexNAc-HexNAc+NeuAc1	Hex-(HexNAc-)Hex-(Hex-HexNAc-Hex-)Hex-HexNAc-HexNAc+NeuAc1	Hex-HexNAc-(HexNAc-)Hex-(Hex-Hex-)Hex-HexNAc-HexNAc+NeuAc1	HexNAc-(Hex-HexNAc-)Hex-(Hex-Hex-)Hex-HexNAc-HexNAc+NeuAc1	HexNAc-(HexNAc-)Hex-(Hex-(Hex-)Hex-)Hex-HexNAc-HexNAc+NeuAc1	HexNAc-(HexNAc-)Hex-(Hex-Hex-Hex-)Hex-HexNAc-HexNAc+NeuAc1	Hex-Hex-(HexNAc-)Hex-(HexNAc-Hex-)Hex-HexNAc-HexNAc+NeuAc1
					11520	11517	1220.48	1220.24	4	4876.93	84.65	1193.78	SCGECIQAGPNCGWCTNSTFLQEGMPTSAR	-	No	1	0.96	62.01	31.13	0	TRUE	0.3	5-3-0-0-0	1-0-0-0-0	HexNAc-(HexNAc-)Hex-(Hex-)Hex-HexNAc-HexNAc+Hex1	HexNAc-Hex-(HexNAc-Hex-)Hex-HexNAc-HexNAc+Hex1
					11731	11726	1243.52	1243.19	3	3726.54	86.38	1337.1	NGTNDGDYVFLTGEDSYLNFTK	-	No	0	0.71	90.71	14.8	0	TRUE	3.01	3-4-0-0-0	1-0-0-0-0	Hex-Hex-(Hex-)Hex-HexNAc-HexNAc+Hex1	Hex-(Hex-Hex-)Hex-HexNAc-HexNAc+Hex1
					11848	11847	1247.22	1246.56	3	3736.67	87.38	1362.33	GLVMNYPHITNLTNLGQSTEYR	-	No	0	0.8	23.36	2.01	0	TRUE	2.81	2-5-0-0-0	0-1-0-0-0	Hex-Hex-(Hex-)Hex-HexNAc-HexNAc+HexNAc1	Hex-(Hex-Hex-)Hex-HexNAc-HexNAc+HexNAc1
					12118	12111	917.178	916.932	4	3663.7	89.99	643.089	YLQPLLAVQFTNLTMDTEIR	-	No	0	0.94	8.22	3.42	0	TRUE	6.6	4-3-0-0-0	1-0-0-0-0	HexNAc-Hex-(Hex-)Hex-HexNAc-HexNAc+Hex1	Hex-(HexNAc-Hex-)Hex-HexNAc-HexNAc+Hex1
					12233	12232	1394.4	1393.89	4	5571.54	91.09	1357.67	YKVPAEILANTSDNAGFCIPEGNCLGSGVLNVSICK	-	No	1	0.59	56.01	10.79	-3	TRUE	0.53	6-3-0-0-0	3-0-0-0-0	HexNAc-Hex-(Hex-)Hex-HexNAc-HexNAc+Hex3	Hex-(HexNAc-Hex-)Hex-HexNAc-HexNAc+Hex3
					12318	12309	1239.74	1239.5	4	4953.97	91.91	1260.62	EGFYLNYTSGLCQPCDCSPHGALSIPCNSSGK	-	No	1	0.86	46.94	15.34	-2	TRUE	1.38	2-6-0-0-0	0-2-0-0-0	Hex-Hex-(Hex-)Hex-HexNAc-HexNAc+HexNAc2	Hex-(Hex-Hex-)Hex-HexNAc-HexNAc+HexNAc2
					12424	12419	1086.19	1085.94	4	4339.73	92.94	747.365	DDAGNYTCIASNGPQGQIR	-	No	1	0.56	34.54	123.34	0	TRUE	6.3	6-4-1-1-0	0-0-1-0-0	NeuAc-Hex-HexNAc-(HexNAc-)Hex-(HexNAc-(HexNAc-)Hex-)Hex-HexNAc-HexNAc+DeHex1
					12580	12573	917.182	916.933	4	3663.7	94.73	643.173	YLQPLLAVQFTNLTMDTEIR	-	No	0	0.52	54.78	10.6	0	TRUE	5.4	4-3-0-0-0	1-0-0-0-0	HexNAc-Hex-(Hex-)Hex-HexNAc-HexNAc+Hex1	Hex-(HexNAc-Hex-)Hex-HexNAc-HexNAc+Hex1
					12629	12628	1332.88	1332.88	3	3995.61	95.23	1172.18	SDAVSHTGNYTCEVTELTR	-	No	0	0.84	4.06	12.67	0	TRUE	2.63	3-5-1-1-0	0-0-0-1-0	DeHex-HexNAc-(Hex-Hex-)Hex-(Hex-)Hex-HexNAc-HexNAc+NeuAc1	DeHex-HexNAc-(Hex-)Hex-(Hex-Hex-)Hex-HexNAc-HexNAc+NeuAc1	DeHex-HexNAc-Hex-(Hex-(Hex-)Hex-)Hex-HexNAc-HexNAc+NeuAc1	DeHex-HexNAc-Hex-(Hex-Hex-Hex-)Hex-HexNAc-HexNAc+NeuAc1
					13191	13188	1108.82	1108.49	3	3322.43	101.69	973.087	LLHALGGDDFLGMLNR	-	No	0	0.95	88.06	22.47	0	TRUE	6.69	3-6-0-0-0	1-0-0-0-0	Hex-Hex-Hex-Hex-(Hex-)Hex-HexNAc-HexNAc+Hex1	Hex-Hex-Hex-(Hex-Hex-)Hex-HexNAc-HexNAc+Hex1	Hex-Hex-(Hex-Hex-Hex-)Hex-HexNAc-HexNAc+Hex1
					13511	13508	989.438	989.438	3	2965.29	105.38	977.16	SDLNPANGSYPFQALR	-	No	0	0.7	21.02	0	-2	TRUE	4.86	2-5-0-0-0	0-2-0-0-0	Hex-(Hex-)Hex-HexNAc-HexNAc+HexNAc2
					13895	13892	838.868	838.624	4	3350.47	110.3	663.487	EEEAIQLDGLNASQIR	-	No	0	0.54	35.9	6.45	0	TRUE	3.64	3-5-1-0-0	1-0-0-0-0	Hex-Hex-Hex-(Hex-)Hex-HexNAc-(DeHex-)HexNAc+Hex1	Hex-Hex-(Hex-Hex-)Hex-HexNAc-(DeHex-)HexNAc+Hex1
Partially sequenced records					2	1	1158.54	1158.54	2	2315.06	10.01	1139.72	-	-	No	0	1	155.19	0	0	FALSE	-	2-3-0-0-0		Hex-(Hex-)Hex-HexNAc-HexNAc+Hex
					4	1	1480.34	1479.85	2	2957.68	10.04	1798.58	-	-	No	0	1	179.39	0	0	FALSE	-	2-3-0-0-0		Hex-(Hex-)Hex-HexNAc-HexNAc+Hex
					6	1	887.619	887.619	2	1773.22	10.07	606.255	-	-	No	0	1	111.03	0	0	FALSE	-	2-3-0-0-0		Hex-(Hex-)Hex-HexNAc-HexNAc+Hex
					271	270	1071.65	1071.65	2	2141.28	14.64	791.842	-	-	No	0	1	59.47	0	0	FALSE	-	2-3-0-0-0		Hex-(Hex-)Hex-HexNAc-HexNAc+Hex
					280	279	651.149	650.649	2	1299.28	14.79	288.633	-	-	No	0	1	112.99	0	0	FALSE	-	2-3-0-0-0		Hex-(Hex-)Hex-HexNAc-HexNAc+Hex
					287	286	808.978	808.644	3	2422.91	14.9	797.226	-	-	No	0	1	129.39	0	0	FALSE	-	2-3-1-0-0		Hex-(Hex-)Hex-HexNAc-(DeHex-)HexNAc+Hex
					289	286	1078.44	1078.1	3	3231.29	14.91	569.969	-	-	No	0	0.59	0.87	122.54	-1	TRUE	-	5-7-1-0-0	1-0-0-0-0	HexNAc-Hex-Hex-Hex-(Hex-Hex-(HexNAc-)Hex-)Hex-HexNAc-(DeHex-)HexNAc+Hex1
					291	286	669.767	669.516	4	2674.03	14.92	591.147	-	-	No	0	0.95	100.97	0.08	0	FALSE	-	2-4-0-0-0		Hex-Hex-(Hex-)Hex-HexNAc-HexNAc+Hex	Hex-(Hex-Hex-)Hex-HexNAc-HexNAc+Hex
					293	286	660.654	660.32	3	1977.94	14.93	681.351	-	-	No	0	1	102.6	0	0	FALSE	-	2-3-1-0-0		Hex-(Hex-)Hex-HexNAc-(DeHex-)HexNAc+Hex	Hex-(Hex-)Hex-HexNAc-HexNAc+Hex
					295	286	680.013	680.013	3	2037.02	14.94	665.297	-	-	No	0	1	104.26	0	0	FALSE	-	2-3-1-0-0		Hex-(Hex-)Hex-HexNAc-(DeHex-)HexNAc+Hex
					298	297	817.936	817.936	2	1633.86	14.96	597.948	-	-	No	0	1	102.81	0	0	FALSE	-	2-3-0-0-0		Hex-(Hex-)Hex-HexNAc-HexNAc+Hex	Hex-(Hex-)Hex-HexNAc-(DeHex-)HexNAc+Hex
					300	297	723.308	722.974	3	2165.9	14.97	447.864	-	-	No	0	1	201.4	3.78	0	FALSE	-	3-4-1-0-0		Hex-Hex-(HexNAc-Hex-)Hex-HexNAc-(DeHex-)HexNAc+Hex
					302	297	796.663	796.328	3	2385.96	14.98	761.775	-	-	No	0	1	100.59	0	0	FALSE	-	2-3-1-0-0		Hex-(Hex-)Hex-HexNAc-(DeHex-)HexNAc+Hex
					304	297	1194.49	1193.99	2	2385.96	14.99	1142.01	-	-	No	0	1	100.04	0	0	FALSE	-	2-4-0-0-0		Hex-(Hex-Hex-)Hex-HexNAc-HexNAc+Hex	Hex-Hex-(Hex-)Hex-HexNAc-HexNAc+Hex
					306	297	766.289	765.956	3	2294.84	15	754.384	-	-	No	0	1	106.63	0	0	FALSE	-	2-3-0-0-0		Hex-(Hex-)Hex-HexNAc-HexNAc+Hex	Hex-(Hex-)Hex-HexNAc-(DeHex-)HexNAc+Hex
					309	308	671.53	671.279	4	2681.09	15.02	365.181	-	-	No	0	0.67	4.12	147.19	0	FALSE	-	5-4-0-0-0		HexNAc-(HexNAc-)Hex-(HexNAc-(Hex-)Hex-)Hex-HexNAc-HexNAc+Hex	HexNAc-(HexNAc-)Hex-(Hex-HexNAc-Hex-)Hex-HexNAc-HexNAc+Hex	HexNAc-(Hex-HexNAc-)Hex-(HexNAc-Hex-)Hex-HexNAc-HexNAc+Hex
					311	308	803.99	803.656	3	2407.95	15.03	377.401	-	-	No	0	1	0.18	100.4	0	FALSE	-	2-6-0-0-0		Hex-Hex-Hex-Hex-(Hex-)Hex-HexNAc-HexNAc+Hex	Hex-Hex-Hex-(Hex-Hex-)Hex-HexNAc-HexNAc+Hex	Hex-Hex-(Hex-Hex-Hex-)Hex-HexNAc-HexNAc+Hex
					313	308	761.655	761.321	3	2280.94	15.04	709.554	-	-	No	0	1	114.02	0	0	FALSE	-	2-3-0-0-0		Hex-(Hex-)Hex-HexNAc-HexNAc+Hex
					317	308	768.982	768.647	3	2302.92	15.06	515.579	-	-	No	0	1	37.98	104.66	0	FALSE	-	3-3-1-0-0		DeHex-HexNAc-Hex-(Hex-)Hex-HexNAc-HexNAc+Hex
					320	319	772.643	772.309	3	2313.91	15.08	737.842	-	-	No	0	1	100.08	0	0	FALSE	-	2-3-0-0-0		Hex-(Hex-)Hex-HexNAc-HexNAc+Hex	Hex-(Hex-)Hex-HexNAc-(DeHex-)HexNAc+Hex
					324	319	1020.44	1020.44	2	2038.87	15.1	892.568	-	-	No	0	1	112.81	0	0	FALSE	-	2-3-0-0-0		Hex-(Hex-)Hex-HexNAc-HexNAc+Hex
					326	319	733.868	733.868	2	1465.72	15.11	648.195	-	-	No	0	1	41.56	0	0	FALSE	-	2-3-0-0-0		Hex-(Hex-)Hex-HexNAc-HexNAc+Hex
					328	319	682.946	682.946	3	2045.82	15.12	648.107	-	-	No	0	1	107.46	0	0	FALSE	-	2-3-0-0-0		Hex-(Hex-)Hex-HexNAc-HexNAc+Hex
					331	330	1049.46	1048.44	2	2094.87	15.14	892.498	-	-	No	0	1	86.97	0	0	FALSE	-	2-3-0-0-0		Hex-(Hex-)Hex-HexNAc-HexNAc+Hex
					333	330	699.639	699.639	3	2095.89	15.15	336.916	-	-	No	0	1	3.9	117.92	0	FALSE	-	3-4-0-0-0		Hex-Hex-(HexNAc-Hex-)Hex-HexNAc-HexNAc+Hex
					335	330	706.966	706.966	3	2117.88	15.16	695.208	-	-	No	0	1	139.48	0	0	FALSE	-	2-3-1-0-0		Hex-(Hex-)Hex-HexNAc-(DeHex-)HexNAc+Hex
					337	330	663.779	663.529	4	2650.09	15.17	447.864	-	-	No	0	1	9.68	100	0	FALSE	-	2-4-1-0-0		Hex-(Hex-Hex-)Hex-HexNAc-(DeHex-)HexNAc+Hex	Hex-Hex-(Hex-)Hex-HexNAc-(DeHex-)HexNAc+Hex
					339	330	688.293	687.959	3	2060.86	15.18	676.098	-	-	No	0	1	107.27	0	0	FALSE	-	2-3-0-0-0		Hex-(Hex-)Hex-HexNAc-HexNAc+Hex
					342	341	1084.97	1084.47	2	2166.93	15.2	620.397	-	-	No	0	1	23.98	100	0	FALSE	-	3-3-0-0-0		HexNAc-Hex-(Hex-)Hex-HexNAc-HexNAc+Hex	Hex-(HexNAc-Hex-)Hex-HexNAc-HexNAc+Hex
					344	341	921.926	921.926	2	1841.84	15.21	871.137	-	-	No	0	1	1.23	0	0	FALSE	-	2-3-0-0-0		Hex-(Hex-)Hex-HexNAc-HexNAc+Hex
					346	341	873.41	873.41	2	1744.81	15.22	856.766	-	-	No	0	1	72.9	0	0	FALSE	-	2-3-0-0-0		Hex-(Hex-)Hex-HexNAc-HexNAc+Hex
					348	341	730.979	730.312	3	2187.91	15.23	380.702	-	-	No	0	1	6.72	100.67	0	FALSE	-	2-5-0-0-0		Hex-Hex-(Hex-Hex-)Hex-HexNAc-HexNAc+Hex	Hex-Hex-Hex-(Hex-)Hex-HexNAc-HexNAc+Hex
					350	341	1095.46	1095.46	2	2188.91	15.24	895.435	-	-	No	0	1	118.8	0	0	FALSE	-	2-3-0-0-0		Hex-(Hex-)Hex-HexNAc-HexNAc+Hex	Hex-(Hex-)Hex-HexNAc-(DeHex-)HexNAc+Hex
					353	352	655.53	655.279	4	2617.09	15.25	509.919	-	-	No	0	1	100.96	2.68	0	FALSE	-	2-4-0-0-0		Hex-Hex-(Hex-)Hex-HexNAc-HexNAc+Hex	Hex-(Hex-Hex-)Hex-HexNAc-HexNAc+Hex
					355	352	763.337	763.337	2	1524.66	15.27	626.06	-	-	No	0	1	119.46	0	0	FALSE	-	2-3-1-0-0		Hex-(Hex-)Hex-HexNAc-(DeHex-)HexNAc+Hex
					357	352	856.392	854.382	2	1706.75	15.28	706.13	-	-	No	0	1	83.29	0	0	FALSE	-	2-3-0-0-0		Hex-(Hex-)Hex-HexNAc-HexNAc+Hex
					359	352	820.913	820.913	2	1639.81	15.28	812.244	-	-	No	0	1	105.59	0	0	FALSE	-	2-3-0-0-0		Hex-(Hex-)Hex-HexNAc-HexNAc+Hex
					361	352	880.022	879.688	3	2636.04	15.29	760.268	-	-	No	0	1	166.28	3.91	0	FALSE	-	2-5-0-0-0		Hex-Hex-Hex-(Hex-)Hex-HexNAc-HexNAc+Hex	Hex-Hex-(Hex-Hex-)Hex-HexNAc-HexNAc+Hex
					364	363	665.767	665.516	4	2658.03	15.31	410.953	-	-	No	0	1	100.13	0.07	0	FALSE	-	2-4-0-0-0		Hex-Hex-(Hex-)Hex-HexNAc-HexNAc+Hex	Hex-(Hex-Hex-)Hex-HexNAc-HexNAc+Hex
					366	363	887.349	887.019	3	2658.04	15.32	368.865	-	-	No	0	1	0.11	101.03	0	FALSE	-	4-3-2-0-0		HexNAc-(DeHex-HexNAc-)Hex-(Hex-)Hex-HexNAc-(DeHex-)HexNAc+Hex	DeHex-HexNAc-(HexNAc-)Hex-(Hex-)Hex-HexNAc-(DeHex-)HexNAc+Hex	HexNAc-Hex-(DeHex-HexNAc-Hex-)Hex-HexNAc-(DeHex-)HexNAc+Hex	DeHex-HexNAc-Hex-(HexNAc-Hex-)Hex-HexNAc-(DeHex-)HexNAc+Hex
					368	363	950.926	950.926	2	1899.84	15.33	614.403	-	-	No	0	1	110.37	0	0	FALSE	-	2-3-1-0-0		Hex-(Hex-)Hex-HexNAc-(DeHex-)HexNAc+Hex	Hex-(Hex-)Hex-HexNAc-HexNAc+Hex
					370	363	934.039	933.704	3	2798.09	15.34	760.205	-	-	No	0	0.98	200.23	19.22	0	FALSE	-	2-5-0-0-0		Hex-Hex-(Hex-Hex-)Hex-HexNAc-HexNAc+Hex	Hex-Hex-Hex-(Hex-)Hex-HexNAc-HexNAc+Hex
					372	363	695.328	694.331	2	1386.65	15.35	553.286	-	-	No	0	1	100.22	0	0	FALSE	-	2-3-0-0-0		Hex-(Hex-)Hex-HexNAc-HexNAc+Hex
					375	374	747.331	746.997	3	2237.97	15.37	735.408	-	-	No	0	1	108.31	0	0	FALSE	-	2-3-1-0-0		Hex-(Hex-)Hex-HexNAc-(DeHex-)HexNAc+Hex
					377	374	1120.49	1119.99	2	2237.97	15.38	898.483	-	-	No	0	1	128.85	0	0	FALSE	-	2-3-0-0-0		Hex-(Hex-)Hex-HexNAc-HexNAc+Hex
					379	374	754.658	754.324	3	2259.95	15.39	336.916	-	-	No	0	1	2.64	116.73	0	FALSE	-	3-5-0-0-0		Hex-Hex-(Hex-HexNAc-Hex-)Hex-HexNAc-HexNAc+Hex	Hex-Hex-(HexNAc-(Hex-)Hex-)Hex-HexNAc-HexNAc+Hex	Hex-Hex-Hex-(HexNAc-Hex-)Hex-HexNAc-HexNAc+Hex	Hex-(Hex-)Hex-(HexNAc-Hex-)Hex-HexNAc-HexNAc+Hex
					381	374	720.635	720.301	3	2157.88	15.4	504.587	-	-	No	0	1	107.07	0	0	FALSE	-	2-3-0-0-0		Hex-(Hex-)Hex-HexNAc-HexNAc+Hex	Hex-(Hex-)Hex-HexNAc-(DeHex-)HexNAc+Hex
					383	374	823.404	823.404	2	1644.79	15.41	713.531	-	-	No	0	1	24.32	0	0	FALSE	-	2-3-1-0-0		Hex-(Hex-)Hex-HexNAc-(DeHex-)HexNAc+Hex	Hex-(Hex-)Hex-HexNAc-HexNAc+Hex
					386	385	1131.48	1130.98	2	2259.95	15.43	492.925	-	-	No	0	1	16.75	118.72	0	FALSE	-	4-3-1-0-0		DeHex-HexNAc-(HexNAc-)Hex-(Hex-)Hex-HexNAc-HexNAc+Hex	DeHex-HexNAc-Hex-(HexNAc-Hex-)Hex-HexNAc-HexNAc+Hex	HexNAc-(DeHex-HexNAc-)Hex-(Hex-)Hex-HexNAc-HexNAc+Hex	HexNAc-Hex-(DeHex-HexNAc-Hex-)Hex-HexNAc-HexNAc+Hex
					388	385	928.708	928.374	3	2782.1	15.44	760.181	-	-	No	0	0.79	200.97	17.68	0	FALSE	-	2-5-0-0-0		Hex-Hex-(Hex-Hex-)Hex-HexNAc-HexNAc+Hex	Hex-Hex-Hex-(Hex-)Hex-HexNAc-HexNAc+Hex
					394	385	759.646	759.646	3	2275.91	15.47	671.293	-	-	No	0	1	103.44	0	0	FALSE	-	2-3-0-0-0		Hex-(Hex-)Hex-HexNAc-HexNAc+Hex	Hex-(Hex-)Hex-HexNAc-(DeHex-)HexNAc+Hex
					397	396	746.997	746.997	3	2237.97	15.49	735.43	-	-	No	0	1	108.58	0	0	FALSE	-	2-3-1-0-0		Hex-(Hex-)Hex-HexNAc-(DeHex-)HexNAc+Hex
					399	396	736.344	736.344	2	1470.67	15.5	301.23	-	-	No	0	1	40.99	0	0	FALSE	-	2-3-0-0-0		Hex-(Hex-)Hex-HexNAc-HexNAc+Hex
					403	396	710.324	710.324	3	2127.95	15.52	621.979	-	-	No	0	1	103.59	0	0	FALSE	-	2-3-0-0-0		Hex-(Hex-)Hex-HexNAc-HexNAc+Hex	Hex-(Hex-)Hex-HexNAc-(DeHex-)HexNAc+Hex
					405	396	842.017	841.683	3	2522.03	15.53	1072.31	-	-	No	0	1	117.25	0	0	FALSE	-	2-3-0-0-0		Hex-(Hex-)Hex-HexNAc-HexNAc+Hex	Hex-(Hex-)Hex-HexNAc-(DeHex-)HexNAc+Hex
					408	407	787.657	787.657	3	2359.95	15.55	755.47	-	-	No	0	0.8	103.16	0	-1	TRUE	-	2-4-0-0-0	0-1-0-0-0	Hex-(Hex-)Hex-HexNAc-HexNAc+HexNAc1
					410	407	866.4	866.4	2	1730.79	15.56	761.623	-	-	No	0	1	108.62	0	0	FALSE	-	2-3-0-0-0		Hex-(Hex-)Hex-HexNAc-HexNAc+Hex
					412	407	715.977	715.977	3	2144.91	15.57	612.635	-	-	No	0	0.89	102.29	0	0	FALSE	-	2-3-1-0-0		Hex-(Hex-)Hex-HexNAc-(DeHex-)HexNAc+Hex
					414	407	1392.56	1392.06	2	2782.1	15.58	760.096	-	-	No	0	0.85	25.13	133.16	0	FALSE	-	2-5-1-0-0		Hex-Hex-(Hex-Hex-)Hex-HexNAc-(DeHex-)HexNAc+Hex	Hex-Hex-Hex-(Hex-)Hex-HexNAc-(DeHex-)HexNAc+Hex
					416	407	947.446	947.446	2	1892.88	15.59	895.175	-	-	No	0	1	103.84	0	0	FALSE	-	2-3-0-0-0		Hex-(Hex-)Hex-HexNAc-HexNAc+Hex
					419	418	749.392	749.392	2	1496.77	15.61	740.718	-	-	No	0	1	108.14	0	0	FALSE	-	2-3-0-0-0		Hex-(Hex-)Hex-HexNAc-HexNAc+Hex
					421	418	813.33	813.33	2	1624.64	15.62	430.201	-	-	No	0	1	107.79	0	0	FALSE	-	2-3-0-0-0		Hex-(Hex-)Hex-HexNAc-HexNAc+Hex	Hex-(Hex-)Hex-HexNAc-(DeHex-)HexNAc+Hex
					423	418	770.626	770.626	3	2308.86	15.63	525.272	-	-	No	0	1	100.63	0	0	FALSE	-	2-3-1-0-0		Hex-(Hex-)Hex-HexNAc-(DeHex-)HexNAc+Hex
					425	418	982.347	981.849	2	1961.68	15.64	928.8	-	-	No	0	1	179.71	0	0	FALSE	-	2-3-1-0-0		Hex-(Hex-)Hex-HexNAc-(DeHex-)HexNAc+Hex	Hex-(Hex-)Hex-HexNAc-HexNAc+Hex
					427	418	882.881	882.377	2	1762.74	15.65	610.589	-	-	No	0	1	102.41	0	0	FALSE	-	2-3-1-0-0		Hex-(Hex-)Hex-HexNAc-(DeHex-)HexNAc+Hex	Hex-(Hex-)Hex-HexNAc-HexNAc+Hex
					430	429	1156.01	1155.51	2	2309.01	15.67	1137.94	-	-	No	0	1	111.24	0	0	FALSE	-	2-3-0-0-0		Hex-(Hex-)Hex-HexNAc-HexNAc+Hex
					432	429	778.337	778.003	3	2330.99	15.68	724.949	-	-	No	0	1	129.33	0	0	FALSE	-	2-3-1-0-0		Hex-(Hex-)Hex-HexNAc-(DeHex-)HexNAc+Hex	Hex-(Hex-)Hex-HexNAc-HexNAc+Hex
					434	429	692.267	691.766	2	1381.52	15.69	554.773	-	-	No	0	1	103.13	0	0	FALSE	-	2-3-0-0-0		Hex-(Hex-)Hex-HexNAc-HexNAc+Hex
					436	429	657.653	657.653	3	1969.94	15.7	554.773	-	-	No	0	1	100.64	0	0	FALSE	-	2-3-1-0-0		Hex-(Hex-)Hex-HexNAc-(DeHex-)HexNAc+Hex	Hex-(Hex-)Hex-HexNAc-HexNAc+Hex
					438	429	756.789	756.789	2	1511.56	15.71	645.294	-	-	No	0	1	38.07	0	0	FALSE	-	2-3-0-0-0		Hex-(Hex-)Hex-HexNAc-HexNAc+Hex
					441	440	1167	1166.5	2	2330.99	15.73	1095.76	-	-	No	0	0.65	131.87	0	0	FALSE	-	2-3-0-0-0		Hex-(Hex-)Hex-HexNAc-HexNAc+Hex
					443	440	905.913	904.914	2	1807.81	15.74	800.77	-	-	No	0	1	100.08	0	0	FALSE	-	2-3-0-0-0		Hex-(Hex-)Hex-HexNAc-HexNAc+Hex
					445	440	783.659	783.324	3	2346.95	15.75	736.364	-	-	No	0	1	106.74	0	0	FALSE	-	2-3-0-0-0		Hex-(Hex-)Hex-HexNAc-HexNAc+Hex
					449	440	991.425	990.923	2	1979.83	15.77	626.644	-	-	No	0	1	104.22	0	0	FALSE	-	2-3-0-0-0		Hex-(Hex-)Hex-HexNAc-HexNAc+Hex
					452	451	994.743	994.407	3	2980.2	15.79	678.321	-	-	No	0	1	54.93	85.3	0	FALSE	-	3-4-1-0-1		NeuGc-Hex-HexNAc-Hex-(Hex-)Hex-HexNAc-(DeHex-)HexNAc+Hex
					454	451	1097.44	1097.44	2	2192.87	15.8	525.272	-	-	No	0	1	8.58	100	0	FALSE	-	3-3-1-0-0		Hex-(HexNAc-Hex-)Hex-HexNAc-(DeHex-)HexNAc+Hex	HexNAc-Hex-(Hex-)Hex-HexNAc-(DeHex-)HexNAc+Hex
					456	451	889.349	889.017	3	2664.03	15.81	448.885	-	-	No	0	1	0.43	103.3	0	FALSE	-	2-5-1-0-0		Hex-Hex-Hex-(Hex-)Hex-HexNAc-(DeHex-)HexNAc+Hex	Hex-Hex-(Hex-Hex-)Hex-HexNAc-(DeHex-)HexNAc+Hex
					458	451	806.369	806.369	2	1610.72	15.83	569.969	-	-	No	0	1	107.49	0	0	FALSE	-	2-3-0-0-0		Hex-(Hex-)Hex-HexNAc-HexNAc+Hex
					460	451	1127.12	1126.45	3	3376.32	15.84	671.293	-	-	No	1	0.95	12.58	219.29	0	FALSE	-	3-7-0-1-0		NeuAc-Hex-HexNAc-Hex-Hex-(Hex-)Hex-(Hex-)Hex-HexNAc-HexNAc+Hex	NeuAc-Hex-HexNAc-Hex-Hex-Hex-(Hex-Hex-)Hex-HexNAc-HexNAc+Hex	NeuAc-Hex-HexNAc-(Hex-)Hex-(Hex-Hex-Hex-)Hex-HexNAc-HexNAc+Hex	NeuAc-Hex-HexNAc-Hex-(Hex-Hex-(Hex-)Hex-)Hex-HexNAc-HexNAc+Hex	NeuAc-Hex-HexNAc-Hex-(Hex-Hex-Hex-Hex-)Hex-HexNAc-HexNAc+Hex
					463	462	785.665	785.328	3	2352.96	15.85	732.658	-	-	No	0	1	109.3	0	0	FALSE	-	2-3-1-0-0		Hex-(Hex-)Hex-HexNAc-(DeHex-)HexNAc+Hex	Hex-(Hex-)Hex-HexNAc-HexNAc+Hex
					465	462	1230.51	1230	2	2457.99	15.87	833.261	-	-	No	0	0.88	117.37	0	0	FALSE	-	2-3-0-0-0		Hex-(Hex-)Hex-HexNAc-HexNAc+Hex	Hex-(Hex-)Hex-HexNAc-(DeHex-)HexNAc+Hex
					467	462	1064.39	1064.07	3	3189.18	15.88	1008.29	-	-	No	0	1	149.72	0	0	FALSE	-	2-3-1-0-0		Hex-(Hex-)Hex-HexNAc-(DeHex-)HexNAc+Hex
					469	462	917.902	917.902	2	1833.79	15.89	868.847	-	-	No	0	1	83.94	0	0	FALSE	-	2-3-0-0-0		Hex-(Hex-)Hex-HexNAc-HexNAc+Hex
					471	462	1025.41	1025.08	3	3072.21	15.9	787.731	-	-	No	1	1	196.82	61.97	-1	TRUE	-	2-8-0-0-0	0-1-0-0-0	Hex-Hex-Hex-Hex-Hex-(Hex-)Hex-HexNAc-HexNAc+HexNAc1	Hex-Hex-Hex-Hex-(Hex-Hex-)Hex-HexNAc-HexNAc+HexNAc1	Hex-Hex-Hex-(Hex-Hex-Hex-)Hex-HexNAc-HexNAc+HexNAc1
					474	473	697.288	696.955	3	2087.84	15.92	685.927	-	-	No	0	1	134.1	0	0	FALSE	-	2-3-0-0-0		Hex-(Hex-)Hex-HexNAc-HexNAc+Hex
					476	473	752.076	751.824	4	3003.27	15.93	606.255	-	-	No	0	1	102.18	3.81	0	FALSE	-	2-6-0-0-0		Hex-Hex-(Hex-Hex-Hex-)Hex-HexNAc-HexNAc+Hex	Hex-Hex-Hex-Hex-(Hex-)Hex-HexNAc-HexNAc+Hex	Hex-Hex-Hex-(Hex-Hex-)Hex-HexNAc-HexNAc+Hex
					478	473	690.341	690.341	2	1378.67	15.94	400.157	-	-	No	0	1	98.27	0	0	FALSE	-	2-3-0-0-0		Hex-(Hex-)Hex-HexNAc-HexNAc+Hex
					480	473	781.325	781.325	3	2340.95	15.95	427.206	-	-	No	0	1	107.15	0	0	FALSE	-	2-3-0-0-0		Hex-(Hex-)Hex-HexNAc-HexNAc+Hex
					482	473	871.377	870.703	3	2609.09	15.96	818.724	-	-	No	0	1	115.65	0	0	FALSE	-	2-3-1-0-0		Hex-(Hex-)Hex-HexNAc-(DeHex-)HexNAc+Hex	Hex-(Hex-)Hex-HexNAc-HexNAc+Hex
					485	484	938.038	937.704	3	2810.09	15.98	569.969	-	-	No	0	1	107.81	61.35	0	FALSE	-	4-5-0-0-0		HexNAc-(Hex-)Hex-(Hex-HexNAc-Hex-)Hex-HexNAc-HexNAc+Hex	Hex-HexNAc-Hex-HexNAc-Hex-(Hex-)Hex-HexNAc-HexNAc+Hex	Hex-HexNAc-(HexNAc-)Hex-(Hex-Hex-)Hex-HexNAc-HexNAc+Hex	Hex-(HexNAc-)Hex-(Hex-HexNAc-Hex-)Hex-HexNAc-HexNAc+Hex	Hex-HexNAc-(Hex-HexNAc-)Hex-(Hex-)Hex-HexNAc-HexNAc+Hex	Hex-(Hex-HexNAc-)Hex-(HexNAc-Hex-)Hex-HexNAc-HexNAc+Hex	HexNAc-(HexNAc-)Hex-(Hex-Hex-Hex-)Hex-HexNAc-HexNAc+Hex	HexNAc-(HexNAc-)Hex-(Hex-(Hex-)Hex-)Hex-HexNAc-HexNAc+Hex	HexNAc-(Hex-HexNAc-)Hex-(Hex-Hex-)Hex-HexNAc-HexNAc+Hex	Hex-HexNAc-Hex-(Hex-HexNAc-Hex-)Hex-HexNAc-HexNAc+Hex	Hex-HexNAc-Hex-(HexNAc-(Hex-)Hex-)Hex-HexNAc-HexNAc+Hex	Hex-(HexNAc-)Hex-(HexNAc-(Hex-)Hex-)Hex-HexNAc-HexNAc+Hex	HexNAc-(Hex-)Hex-(HexNAc-(Hex-)Hex-)Hex-HexNAc-HexNAc+Hex	HexNAc-(Hex-Hex-)Hex-(HexNAc-Hex-)Hex-HexNAc-HexNAc+Hex
					487	484	1073.47	1073.47	2	2144.92	16	918.449	-	-	No	0	1	101.31	0	0	FALSE	-	2-3-0-0-0		Hex-(Hex-)Hex-HexNAc-HexNAc+Hex
					489	484	1186.53	1186.02	2	2370.02	16.01	679.692	-	-	No	0	0.99	140.91	100	-1	TRUE	-	2-5-0-0-0	0-1-0-0-0	Hex-Hex-(Hex-)Hex-HexNAc-HexNAc+HexNAc1	Hex-(Hex-Hex-)Hex-HexNAc-HexNAc+HexNAc1
					491	484	858.377	858.377	2	1714.74	16.02	841.382	-	-	No	0	1	86.73	0	0	FALSE	-	2-3-0-0-0		Hex-(Hex-)Hex-HexNAc-HexNAc+Hex
					493	484	1042	1042	2	2081.99	16.03	989.834	-	-	No	0	1	100.71	0	0	FALSE	-	2-3-0-0-0		Hex-(Hex-)Hex-HexNAc-HexNAc+Hex
					496	495	676.33	676.33	2	1350.64	16.05	297.282	-	-	No	0	1	19.97	0	0	FALSE	-	2-3-0-0-0		Hex-(Hex-)Hex-HexNAc-HexNAc+Hex
					498	495	653.294	653.294	2	1304.57	16.07	525.272	-	-	No	0	1	113.38	0	0	FALSE	-	2-3-0-0-0		Hex-(Hex-)Hex-HexNAc-HexNAc+Hex
					500	495	929.929	929.929	2	1857.84	16.07	483.754	-	-	No	0	1	101.94	0	-1	TRUE	-	3-3-0-0-0	1-0-0-0-0	Hex-(Hex-)Hex-HexNAc-HexNAc+Hex1
					502	495	828.415	828.415	2	1654.82	16.08	776.313	-	-	No	0	1	101.86	0	0	FALSE	-	2-3-0-0-0		Hex-(Hex-)Hex-HexNAc-HexNAc+Hex
					504	495	1444.81	1444.56	4	5774.19	16.1	764.375	-	-	No	0	1	16.49	732.41	0	FALSE	-	3-18-0-0-0		Hex-Hex-Hex-Hex-Hex-Hex-(Hex-Hex-Hex-Hex-Hex-Hex-Hex-)Hex-(HexNAc-Hex-Hex-Hex-)Hex-HexNAc-HexNAc+Hex	Hex-Hex-Hex-Hex-Hex-Hex-Hex-Hex-(Hex-Hex-)Hex-(Hex-Hex-Hex-Hex-Hex-(HexNAc-)Hex-)Hex-HexNAc-HexNAc+Hex	Hex-Hex-Hex-Hex-Hex-Hex-Hex-Hex-(Hex-Hex-)Hex-(Hex-Hex-Hex-Hex-(Hex-HexNAc-)Hex-)Hex-HexNAc-HexNAc+Hex	Hex-Hex-Hex-Hex-Hex-Hex-Hex-Hex-(Hex-Hex-Hex-)Hex-(Hex-Hex-Hex-(Hex-HexNAc-)Hex-)Hex-HexNAc-HexNAc+Hex	Hex-Hex-Hex-Hex-Hex-Hex-Hex-Hex-(Hex-Hex-Hex-)Hex-(Hex-Hex-Hex-Hex-(HexNAc-)Hex-)Hex-HexNAc-HexNAc+Hex	Hex-Hex-Hex-Hex-Hex-Hex-Hex-Hex-(Hex-Hex-Hex-)Hex-(Hex-HexNAc-(Hex-Hex-Hex-)Hex-)Hex-HexNAc-HexNAc+Hex	Hex-Hex-Hex-Hex-Hex-Hex-Hex-Hex-(Hex-Hex-Hex-Hex-)Hex-(Hex-Hex-(Hex-HexNAc-)Hex-)Hex-HexNAc-HexNAc+Hex	Hex-Hex-Hex-Hex-Hex-Hex-Hex-Hex-(Hex-Hex-Hex-Hex-Hex-)Hex-(Hex-Hex-(HexNAc-)Hex-)Hex-HexNAc-HexNAc+Hex	Hex-Hex-Hex-Hex-Hex-Hex-Hex-Hex-(Hex-Hex-Hex-Hex-)Hex-(Hex-HexNAc-(Hex-Hex-)Hex-)Hex-HexNAc-HexNAc+Hex	Hex-Hex-Hex-Hex-Hex-Hex-Hex-Hex-(Hex-Hex-Hex-Hex-Hex-)Hex-(HexNAc-(Hex-Hex-)Hex-)Hex-HexNAc-HexNAc+Hex	Hex-Hex-Hex-Hex-Hex-Hex-Hex-Hex-(Hex-Hex-Hex-Hex-Hex-)Hex-(Hex-HexNAc-(Hex-)Hex-)Hex-HexNAc-HexNAc+Hex	Hex-Hex-Hex-Hex-Hex-Hex-Hex-Hex-(Hex-Hex-Hex-Hex-Hex-Hex-)Hex-(Hex-HexNAc-Hex-)Hex-HexNAc-HexNAc+Hex	Hex-Hex-Hex-Hex-Hex-Hex-Hex-Hex-(Hex-Hex-Hex-Hex-Hex-Hex-)Hex-(HexNAc-(Hex-)Hex-)Hex-HexNAc-HexNAc+Hex	Hex-Hex-Hex-Hex-Hex-Hex-Hex-Hex-(Hex-Hex-Hex-Hex-Hex-Hex-Hex-)Hex-(HexNAc-Hex-)Hex-HexNAc-HexNAc+Hex	HexNAc-Hex-Hex-Hex-Hex-Hex-Hex-Hex-Hex-(Hex-Hex-Hex-Hex-Hex-Hex-Hex-)Hex-(Hex-)Hex-HexNAc-HexNAc+Hex	Hex-Hex-Hex-Hex-Hex-Hex-Hex-Hex-(Hex-)Hex-(Hex-Hex-Hex-Hex-Hex-(Hex-HexNAc-)Hex-)Hex-HexNAc-HexNAc+Hex	Hex-HexNAc-Hex-Hex-Hex-Hex-Hex-Hex-Hex-Hex-(Hex-Hex-Hex-Hex-Hex-Hex-)Hex-(Hex-)Hex-HexNAc-HexNAc+Hex	Hex-Hex-Hex-Hex-(Hex-Hex-Hex-Hex-Hex-)Hex-(HexNAc-Hex-Hex-Hex-Hex-(Hex-Hex-)Hex-)Hex-HexNAc-HexNAc+Hex	Hex-Hex-Hex-Hex-Hex-Hex-(Hex-Hex-Hex-Hex-Hex-)Hex-(Hex-HexNAc-Hex-Hex-(Hex-)Hex-)Hex-HexNAc-HexNAc+Hex	Hex-Hex-Hex-Hex-Hex-Hex-(Hex-Hex-Hex-Hex-Hex-)Hex-(HexNAc-Hex-Hex-(Hex-Hex-)Hex-)Hex-HexNAc-HexNAc+Hex	Hex-Hex-Hex-Hex-Hex-Hex-(Hex-Hex-Hex-Hex-)Hex-(Hex-HexNAc-Hex-Hex-(Hex-Hex-)Hex-)Hex-HexNAc-HexNAc+Hex	Hex-Hex-Hex-Hex-Hex-Hex-(Hex-Hex-Hex-Hex-)Hex-(HexNAc-Hex-Hex-(Hex-Hex-Hex-)Hex-)Hex-HexNAc-HexNAc+Hex	Hex-Hex-Hex-Hex-Hex-Hex-(Hex-Hex-Hex-)Hex-(Hex-HexNAc-Hex-Hex-(Hex-Hex-Hex-)Hex-)Hex-HexNAc-HexNAc+Hex	Hex-Hex-Hex-Hex-Hex-Hex-(Hex-Hex-Hex-)Hex-(HexNAc-Hex-Hex-(Hex-Hex-Hex-Hex-)Hex-)Hex-HexNAc-HexNAc+Hex	Hex-Hex-Hex-Hex-Hex-Hex-(Hex-Hex-)Hex-(Hex-HexNAc-Hex-Hex-(Hex-Hex-Hex-Hex-)Hex-)Hex-HexNAc-HexNAc+Hex
					507	506	794.69	794.352	3	2380.03	16.11	606.255	-	-	No	0	1	142.19	0	0	FALSE	-	2-3-0-0-0		Hex-(Hex-)Hex-HexNAc-HexNAc+Hex	Hex-(Hex-)Hex-HexNAc-(DeHex-)HexNAc+Hex
					509	506	1002.44	1002.1	3	3003.27	16.13	523.227	-	-	No	0	1	2.39	100.93	0	FALSE	-	3-4-0-0-0		Hex-HexNAc-Hex-(Hex-)Hex-HexNAc-HexNAc+Hex	HexNAc-Hex-(Hex-Hex-)Hex-HexNAc-HexNAc+Hex	HexNAc-(Hex-)Hex-(Hex-)Hex-HexNAc-HexNAc+Hex
					511	506	1191.54	1191.03	2	2380.04	16.14	828.969	-	-	No	0	1	112.1	0	0	FALSE	-	2-3-1-0-0		Hex-(Hex-)Hex-HexNAc-(DeHex-)HexNAc+Hex	Hex-(Hex-)Hex-HexNAc-HexNAc+Hex
					513	506	1069.42	1068.92	2	2135.83	16.15	1028.37	-	-	No	0	1	37.01	0	0	FALSE	-	2-3-0-0-0		Hex-(Hex-)Hex-HexNAc-HexNAc+Hex
					515	506	845.364	845.364	2	1688.71	16.16	835.269	-	-	No	0	1	11.25	0	0	FALSE	-	2-3-0-0-0		Hex-(Hex-)Hex-HexNAc-HexNAc+Hex
					520	517	1202.52	1202.02	2	2402.02	16.19	678.321	-	-	No	0	0.98	19.81	52.2	0	FALSE	-	2-5-0-0-0		Hex-Hex-(Hex-Hex-)Hex-HexNAc-HexNAc+Hex	Hex-Hex-Hex-(Hex-)Hex-HexNAc-HexNAc+Hex
					522	517	1123.85	1123.44	5	5612.15	16.2	1029.73	-	-	No	0	1	149.35	162.24	0	FALSE	-	2-7-0-0-0		Hex-Hex-Hex-(Hex-Hex-Hex-)Hex-HexNAc-HexNAc+Hex	Hex-Hex-Hex-Hex-(Hex-Hex-)Hex-HexNAc-HexNAc+Hex	Hex-Hex-Hex-Hex-Hex-(Hex-)Hex-HexNAc-HexNAc+Hex
					524	517	1926.41	1926.09	3	5775.25	16.21	1307.47	-	-	No	0	1	181.78	274.92	0	FALSE	-	2-7-0-0-0		Hex-Hex-Hex-Hex-Hex-(Hex-)Hex-HexNAc-HexNAc+Hex	Hex-Hex-Hex-(Hex-Hex-Hex-)Hex-HexNAc-HexNAc+Hex	Hex-Hex-Hex-Hex-(Hex-Hex-)Hex-HexNAc-HexNAc+Hex
					526	517	1404.56	1404.05	4	5612.16	16.22	764.375	-	-	No	0	1	9.72	718.55	0	FALSE	-	3-17-0-0-0		Hex-HexNAc-Hex-Hex-Hex-Hex-(Hex-Hex-Hex-Hex-)Hex-(Hex-Hex-(Hex-Hex-Hex-)Hex-)Hex-HexNAc-HexNAc+Hex	Hex-Hex-Hex-Hex-Hex-Hex-(Hex-Hex-Hex-Hex-Hex-Hex-Hex-)Hex-(Hex-HexNAc-Hex-)Hex-HexNAc-HexNAc+Hex	Hex-Hex-Hex-Hex-Hex-Hex-(Hex-Hex-Hex-Hex-Hex-)Hex-(Hex-HexNAc-(Hex-Hex-)Hex-)Hex-HexNAc-HexNAc+Hex	Hex-Hex-Hex-Hex-Hex-Hex-(Hex-Hex-Hex-Hex-Hex-Hex-)Hex-(Hex-Hex-(HexNAc-)Hex-)Hex-HexNAc-HexNAc+Hex	Hex-Hex-Hex-Hex-Hex-Hex-(Hex-Hex-Hex-Hex-Hex-)Hex-(Hex-Hex-Hex-(HexNAc-)Hex-)Hex-HexNAc-HexNAc+Hex	Hex-Hex-Hex-Hex-Hex-Hex-(Hex-Hex-Hex-Hex-Hex-)Hex-(Hex-Hex-(Hex-HexNAc-)Hex-)Hex-HexNAc-HexNAc+Hex	Hex-Hex-Hex-Hex-Hex-Hex-(Hex-Hex-Hex-Hex-)Hex-(Hex-HexNAc-(Hex-Hex-Hex-)Hex-)Hex-HexNAc-HexNAc+Hex	Hex-Hex-Hex-Hex-Hex-Hex-(Hex-Hex-Hex-Hex-)Hex-(Hex-Hex-Hex-Hex-(HexNAc-)Hex-)Hex-HexNAc-HexNAc+Hex	Hex-Hex-Hex-Hex-Hex-Hex-(Hex-Hex-Hex-Hex-)Hex-(Hex-Hex-Hex-(Hex-HexNAc-)Hex-)Hex-HexNAc-HexNAc+Hex	Hex-Hex-Hex-Hex-Hex-Hex-(Hex-Hex-Hex-)Hex-(Hex-Hex-Hex-Hex-(Hex-HexNAc-)Hex-)Hex-HexNAc-HexNAc+Hex	Hex-Hex-Hex-Hex-Hex-Hex-(Hex-Hex-Hex-)Hex-(Hex-Hex-Hex-Hex-Hex-(HexNAc-)Hex-)Hex-HexNAc-HexNAc+Hex	Hex-Hex-Hex-Hex-Hex-Hex-(Hex-Hex-)Hex-(Hex-Hex-Hex-Hex-Hex-(Hex-HexNAc-)Hex-)Hex-HexNAc-HexNAc+Hex	Hex-Hex-Hex-Hex-Hex-Hex-(Hex-Hex-Hex-Hex-Hex-Hex-Hex-)Hex-(HexNAc-(Hex-)Hex-)Hex-HexNAc-HexNAc+Hex	Hex-Hex-Hex-Hex-Hex-Hex-(Hex-Hex-)Hex-(Hex-Hex-Hex-Hex-Hex-Hex-(HexNAc-)Hex-)Hex-HexNAc-HexNAc+Hex	Hex-Hex-Hex-Hex-Hex-Hex-(Hex-)Hex-(Hex-Hex-Hex-Hex-Hex-Hex-Hex-(HexNAc-)Hex-)Hex-HexNAc-HexNAc+Hex	Hex-Hex-Hex-Hex-Hex-Hex-Hex-(Hex-HexNAc-)Hex-(Hex-Hex-Hex-Hex-Hex-Hex-Hex-)Hex-HexNAc-HexNAc+Hex	Hex-Hex-Hex-Hex-Hex-Hex-(Hex-HexNAc-)Hex-(Hex-Hex-Hex-Hex-Hex-Hex-(Hex-)Hex-)Hex-HexNAc-HexNAc+Hex	Hex-Hex-Hex-Hex-Hex-Hex-(Hex-HexNAc-)Hex-(Hex-Hex-Hex-Hex-Hex-Hex-Hex-Hex-)Hex-HexNAc-HexNAc+Hex	Hex-Hex-Hex-Hex-Hex-(Hex-HexNAc-)Hex-(Hex-Hex-Hex-Hex-Hex-Hex-(Hex-Hex-)Hex-)Hex-HexNAc-HexNAc+Hex	Hex-Hex-Hex-Hex-Hex-(Hex-HexNAc-)Hex-(Hex-Hex-Hex-Hex-Hex-Hex-Hex-Hex-Hex-)Hex-HexNAc-HexNAc+Hex	Hex-Hex-Hex-Hex-Hex-Hex-Hex-Hex-(HexNAc-)Hex-(Hex-Hex-Hex-Hex-Hex-Hex-Hex-)Hex-HexNAc-HexNAc+Hex	Hex-Hex-Hex-Hex-Hex-Hex-Hex-(HexNAc-)Hex-(Hex-Hex-Hex-Hex-Hex-Hex-(Hex-)Hex-)Hex-HexNAc-HexNAc+Hex	Hex-Hex-Hex-Hex-Hex-Hex-Hex-(HexNAc-)Hex-(Hex-Hex-Hex-Hex-Hex-Hex-Hex-Hex-)Hex-HexNAc-HexNAc+Hex	Hex-Hex-Hex-Hex-Hex-Hex-(HexNAc-)Hex-(Hex-Hex-Hex-Hex-Hex-Hex-Hex-(Hex-)Hex-)Hex-HexNAc-HexNAc+Hex	Hex-Hex-Hex-Hex-Hex-Hex-(HexNAc-)Hex-(Hex-Hex-Hex-Hex-Hex-Hex-(Hex-Hex-)Hex-)Hex-HexNAc-HexNAc+Hex
					529	528	877.042	876.709	3	2627.1	16.24	497.366	-	-	No	0	1	103.26	19.49	0	FALSE	-	3-4-0-0-0		HexNAc-Hex-(Hex-Hex-)Hex-HexNAc-HexNAc+Hex	HexNAc-(Hex-)Hex-(Hex-)Hex-HexNAc-HexNAc+Hex	Hex-HexNAc-Hex-(Hex-)Hex-HexNAc-HexNAc+Hex
					531	528	924.474	923.971	2	1845.93	16.26	915.273	-	-	No	0	1	6.5	0	0	FALSE	-	2-3-0-0-0		Hex-(Hex-)Hex-HexNAc-HexNAc+Hex
					533	528	1091.43	1091.03	5	5450.11	16.27	573.266	-	-	No	0	1	5.24	508.76	-1	TRUE	-	3-17-0-0-0	0-1-0-0-0	Hex-Hex-Hex-Hex-(Hex-Hex-Hex-Hex-Hex-)Hex-(HexNAc-Hex-Hex-Hex-Hex-Hex-)Hex-HexNAc-HexNAc+HexNAc1	Hex-HexNAc-Hex-Hex-Hex-Hex-Hex-Hex-Hex-Hex-(Hex-Hex-Hex-Hex-)Hex-(Hex-)Hex-HexNAc-HexNAc+HexNAc1	HexNAc-Hex-Hex-Hex-Hex-Hex-Hex-Hex-Hex-(Hex-Hex-Hex-Hex-Hex-)Hex-(Hex-)Hex-HexNAc-HexNAc+HexNAc1	Hex-Hex-Hex-Hex-Hex-Hex-Hex-Hex-(Hex-Hex-Hex-Hex-)Hex-(HexNAc-(Hex-)Hex-)Hex-HexNAc-HexNAc+HexNAc1	Hex-Hex-Hex-Hex-Hex-Hex-Hex-Hex-(Hex-Hex-Hex-Hex-)Hex-(Hex-HexNAc-Hex-)Hex-HexNAc-HexNAc+HexNAc1	Hex-Hex-Hex-Hex-Hex-Hex-Hex-Hex-(Hex-Hex-Hex-)Hex-(Hex-HexNAc-(Hex-)Hex-)Hex-HexNAc-HexNAc+HexNAc1	Hex-Hex-Hex-Hex-Hex-Hex-Hex-Hex-(Hex-Hex-Hex-)Hex-(HexNAc-(Hex-Hex-)Hex-)Hex-HexNAc-HexNAc+HexNAc1	Hex-Hex-Hex-Hex-Hex-Hex-Hex-Hex-(Hex-Hex-)Hex-(Hex-HexNAc-(Hex-Hex-)Hex-)Hex-HexNAc-HexNAc+HexNAc1	Hex-Hex-Hex-Hex-Hex-Hex-Hex-Hex-(Hex-Hex-Hex-)Hex-(Hex-Hex-(HexNAc-)Hex-)Hex-HexNAc-HexNAc+HexNAc1	Hex-Hex-Hex-Hex-Hex-Hex-Hex-Hex-(Hex-Hex-Hex-Hex-Hex-)Hex-(HexNAc-Hex-)Hex-HexNAc-HexNAc+HexNAc1	Hex-Hex-Hex-Hex-Hex-Hex-Hex-Hex-(Hex-Hex-)Hex-(Hex-Hex-(Hex-HexNAc-)Hex-)Hex-HexNAc-HexNAc+HexNAc1	Hex-Hex-Hex-Hex-Hex-Hex-Hex-Hex-(Hex-)Hex-(Hex-HexNAc-(Hex-Hex-Hex-)Hex-)Hex-HexNAc-HexNAc+HexNAc1	Hex-Hex-Hex-Hex-Hex-Hex-Hex-Hex-(Hex-)Hex-(Hex-Hex-Hex-Hex-(HexNAc-)Hex-)Hex-HexNAc-HexNAc+HexNAc1	Hex-Hex-Hex-Hex-Hex-Hex-Hex-Hex-(Hex-)Hex-(Hex-Hex-Hex-(Hex-HexNAc-)Hex-)Hex-HexNAc-HexNAc+HexNAc1	Hex-HexNAc-Hex-Hex-(Hex-Hex-Hex-)Hex-(Hex-Hex-Hex-Hex-Hex-Hex-Hex-Hex-)Hex-HexNAc-HexNAc+HexNAc1	Hex-Hex-Hex-Hex-Hex-(HexNAc-Hex-Hex-)Hex-(Hex-Hex-Hex-Hex-Hex-Hex-Hex-)Hex-HexNAc-HexNAc+HexNAc1	Hex-Hex-Hex-Hex-(Hex-HexNAc-Hex-Hex-)Hex-(Hex-Hex-Hex-Hex-Hex-Hex-Hex-)Hex-HexNAc-HexNAc+HexNAc1	Hex-Hex-Hex-Hex-(HexNAc-Hex-Hex-)Hex-(Hex-Hex-Hex-Hex-Hex-Hex-(Hex-)Hex-)Hex-HexNAc-HexNAc+HexNAc1	Hex-Hex-Hex-Hex-(HexNAc-Hex-Hex-)Hex-(Hex-Hex-Hex-Hex-Hex-Hex-Hex-Hex-)Hex-HexNAc-HexNAc+HexNAc1	Hex-HexNAc-Hex-Hex-Hex-Hex-(Hex-Hex-Hex-Hex-)Hex-(Hex-Hex-Hex-Hex-Hex-)Hex-HexNAc-HexNAc+HexNAc1	Hex-HexNAc-Hex-Hex-Hex-Hex-(Hex-Hex-Hex-)Hex-(Hex-Hex-Hex-Hex-(Hex-)Hex-)Hex-HexNAc-HexNAc+HexNAc1	Hex-HexNAc-Hex-Hex-(Hex-Hex-Hex-)Hex-(Hex-Hex-Hex-Hex-Hex-Hex-(Hex-)Hex-)Hex-HexNAc-HexNAc+HexNAc1	Hex-HexNAc-Hex-Hex-Hex-Hex-(Hex-Hex-)Hex-(Hex-Hex-Hex-Hex-(Hex-Hex-)Hex-)Hex-HexNAc-HexNAc+HexNAc1	HexNAc-Hex-Hex-Hex-Hex-(Hex-Hex-Hex-Hex-Hex-)Hex-(Hex-Hex-Hex-Hex-Hex-)Hex-HexNAc-HexNAc+HexNAc1	HexNAc-Hex-Hex-Hex-Hex-(Hex-Hex-Hex-Hex-)Hex-(Hex-Hex-Hex-Hex-(Hex-)Hex-)Hex-HexNAc-HexNAc+HexNAc1
					535	528	945.922	945.419	2	1888.82	16.28	672.824	-	-	No	0	1	104.68	0	0	FALSE	-	2-3-0-0-0		Hex-(Hex-)Hex-HexNAc-HexNAc+Hex	Hex-(Hex-)Hex-HexNAc-(DeHex-)HexNAc+Hex
					537	528	1211.04	1210.54	2	2419.07	16.29	492.925	-	-	No	0	0.99	101.45	6.56	0	FALSE	-	2-5-0-0-0		Hex-Hex-Hex-(Hex-)Hex-HexNAc-HexNAc+Hex	Hex-Hex-(Hex-Hex-)Hex-HexNAc-HexNAc+Hex
					540	539	739.905	739.905	2	1477.8	16.31	731.124	-	-	No	0	1	104.52	0	0	FALSE	-	2-3-0-0-0		Hex-(Hex-)Hex-HexNAc-HexNAc+Hex	Hex-(Hex-)Hex-HexNAc-(DeHex-)HexNAc+Hex
					542	539	1315.06	1314.56	2	2627.1	16.32	523.227	-	-	No	0	1	7.64	76.02	0	FALSE	-	4-4-2-0-0		DeHex-HexNAc-(DeHex-HexNAc-)Hex-(Hex-Hex-)Hex-HexNAc-HexNAc+Hex	DeHex-HexNAc-Hex-(DeHex-HexNAc-(Hex-)Hex-)Hex-HexNAc-HexNAc+Hex	DeHex-HexNAc-(Hex-)Hex-(DeHex-HexNAc-Hex-)Hex-HexNAc-HexNAc+Hex
					544	539	685.328	684.998	3	2051.97	16.33	649.577	-	-	No	0	1	152.88	0	0	FALSE	-	2-3-0-0-0		Hex-(Hex-)Hex-HexNAc-HexNAc+Hex	Hex-(Hex-)Hex-HexNAc-(DeHex-)HexNAc+Hex
					546	539	1006.97	1006.97	2	2011.92	16.34	860.397	-	-	No	0	1	111.47	0	0	FALSE	-	2-3-0-0-0		Hex-(Hex-)Hex-HexNAc-HexNAc+Hex
					548	539	702.802	702.802	2	1403.59	16.35	693.324	-	-	No	0	1	89.05	0	0	FALSE	-	2-3-0-0-0		Hex-(Hex-)Hex-HexNAc-HexNAc+Hex
					551	550	1363.78	1363.54	4	5450.12	16.37	764.375	-	-	No	0	1	20.78	692.07	0	FALSE	-	3-16-0-0-0		Hex-Hex-Hex-Hex-Hex-Hex-Hex-(Hex-Hex-Hex-Hex-)Hex-(Hex-Hex-(HexNAc-)Hex-)Hex-HexNAc-HexNAc+Hex	HexNAc-Hex-Hex-Hex-Hex-(Hex-Hex-Hex-Hex-)Hex-(Hex-Hex-Hex-(Hex-Hex-)Hex-)Hex-HexNAc-HexNAc+Hex	HexNAc-Hex-Hex-Hex-Hex-(Hex-Hex-Hex-)Hex-(Hex-Hex-Hex-(Hex-Hex-Hex-)Hex-)Hex-HexNAc-HexNAc+Hex	Hex-Hex-Hex-Hex-Hex-Hex-Hex-(Hex-Hex-Hex-Hex-Hex-Hex-)Hex-(HexNAc-Hex-)Hex-HexNAc-HexNAc+Hex	Hex-Hex-Hex-Hex-Hex-Hex-Hex-(Hex-Hex-Hex-Hex-Hex-)Hex-(HexNAc-(Hex-)Hex-)Hex-HexNAc-HexNAc+Hex	Hex-Hex-Hex-Hex-Hex-Hex-Hex-(Hex-Hex-Hex-Hex-Hex-)Hex-(Hex-HexNAc-Hex-)Hex-HexNAc-HexNAc+Hex	Hex-Hex-Hex-Hex-Hex-Hex-Hex-(Hex-Hex-Hex-Hex-)Hex-(HexNAc-(Hex-Hex-)Hex-)Hex-HexNAc-HexNAc+Hex	Hex-Hex-Hex-Hex-Hex-Hex-Hex-(Hex-Hex-Hex-)Hex-(Hex-HexNAc-(Hex-Hex-)Hex-)Hex-HexNAc-HexNAc+Hex	Hex-Hex-Hex-Hex-Hex-Hex-Hex-(Hex-Hex-Hex-)Hex-(Hex-Hex-Hex-(HexNAc-)Hex-)Hex-HexNAc-HexNAc+Hex	Hex-Hex-Hex-Hex-Hex-Hex-Hex-(Hex-Hex-Hex-)Hex-(Hex-Hex-(Hex-HexNAc-)Hex-)Hex-HexNAc-HexNAc+Hex	Hex-Hex-Hex-Hex-Hex-Hex-Hex-(Hex-Hex-)Hex-(Hex-HexNAc-(Hex-Hex-Hex-)Hex-)Hex-HexNAc-HexNAc+Hex	Hex-Hex-Hex-Hex-Hex-Hex-Hex-(Hex-Hex-)Hex-(Hex-Hex-Hex-Hex-(HexNAc-)Hex-)Hex-HexNAc-HexNAc+Hex	Hex-Hex-Hex-Hex-Hex-Hex-Hex-(Hex-Hex-)Hex-(Hex-Hex-Hex-(Hex-HexNAc-)Hex-)Hex-HexNAc-HexNAc+Hex	Hex-Hex-Hex-Hex-Hex-Hex-Hex-(Hex-)Hex-(Hex-Hex-Hex-Hex-(Hex-HexNAc-)Hex-)Hex-HexNAc-HexNAc+Hex	Hex-Hex-Hex-Hex-Hex-Hex-Hex-(Hex-)Hex-(Hex-Hex-Hex-Hex-Hex-(HexNAc-)Hex-)Hex-HexNAc-HexNAc+Hex	Hex-Hex-Hex-Hex-Hex-Hex-Hex-Hex-(Hex-Hex-Hex-Hex-Hex-(Hex-HexNAc-)Hex-)Hex-HexNAc-HexNAc+Hex	Hex-Hex-Hex-Hex-Hex-Hex-Hex-Hex-(Hex-Hex-Hex-Hex-Hex-Hex-(HexNAc-)Hex-)Hex-HexNAc-HexNAc+Hex	Hex-HexNAc-Hex-Hex-Hex-Hex-Hex-Hex-(Hex-Hex-Hex-Hex-Hex-)Hex-(Hex-Hex-)Hex-HexNAc-HexNAc+Hex	Hex-HexNAc-Hex-Hex-Hex-Hex-Hex-Hex-(Hex-Hex-Hex-Hex-)Hex-(Hex-(Hex-)Hex-)Hex-HexNAc-HexNAc+Hex	Hex-HexNAc-Hex-Hex-Hex-Hex-Hex-Hex-(Hex-Hex-Hex-)Hex-(Hex-(Hex-Hex-)Hex-)Hex-HexNAc-HexNAc+Hex	Hex-Hex-Hex-Hex-Hex-Hex-Hex-(Hex-Hex-Hex-Hex-)Hex-(Hex-HexNAc-(Hex-)Hex-)Hex-HexNAc-HexNAc+Hex	HexNAc-Hex-Hex-Hex-Hex-(Hex-Hex-Hex-Hex-Hex-)Hex-(Hex-Hex-Hex-(Hex-)Hex-)Hex-HexNAc-HexNAc+Hex	HexNAc-Hex-Hex-Hex-Hex-(Hex-Hex-Hex-Hex-Hex-Hex-)Hex-(Hex-Hex-Hex-Hex-)Hex-HexNAc-HexNAc+Hex	HexNAc-Hex-Hex-Hex-Hex-Hex-Hex-(Hex-Hex-Hex-Hex-)Hex-(Hex-(Hex-Hex-)Hex-)Hex-HexNAc-HexNAc+Hex	HexNAc-Hex-Hex-Hex-Hex-Hex-Hex-(Hex-Hex-Hex-Hex-Hex-)Hex-(Hex-(Hex-)Hex-)Hex-HexNAc-HexNAc+Hex
					553	550	884.366	884.033	3	2649.08	16.38	627.628	-	-	No	0	1	115.96	0	0	FALSE	-	2-3-0-0-0		Hex-(Hex-)Hex-HexNAc-HexNAc+Hex
					555	550	1818.39	1817.71	3	5450.12	16.39	1307.48	-	-	No	0	1	135.93	97.86	0	FALSE	-	3-6-0-0-0		Hex-Hex-(Hex-)Hex-(HexNAc-Hex-)Hex-HexNAc-HexNAc+Hex	Hex-HexNAc-Hex-(Hex-Hex-Hex-)Hex-HexNAc-HexNAc+Hex	HexNAc-(Hex-)Hex-(Hex-Hex-Hex-)Hex-HexNAc-HexNAc+Hex	HexNAc-(Hex-)Hex-(Hex-(Hex-)Hex-)Hex-HexNAc-HexNAc+Hex	HexNAc-(Hex-Hex-)Hex-(Hex-Hex-)Hex-HexNAc-HexNAc+Hex	Hex-HexNAc-(Hex-)Hex-(Hex-Hex-)Hex-HexNAc-HexNAc+Hex	Hex-Hex-Hex-(Hex-HexNAc-Hex-)Hex-HexNAc-HexNAc+Hex	Hex-Hex-Hex-(HexNAc-(Hex-)Hex-)Hex-HexNAc-HexNAc+Hex	Hex-Hex-Hex-Hex-(HexNAc-Hex-)Hex-HexNAc-HexNAc+Hex	Hex-(Hex-)Hex-(Hex-HexNAc-Hex-)Hex-HexNAc-HexNAc+Hex	Hex-(Hex-)Hex-(HexNAc-(Hex-)Hex-)Hex-HexNAc-HexNAc+Hex	Hex-(Hex-Hex-)Hex-(HexNAc-Hex-)Hex-HexNAc-HexNAc+Hex	Hex-HexNAc-Hex-(Hex-(Hex-)Hex-)Hex-HexNAc-HexNAc+Hex
					557	550	834.031	833.694	3	2498.06	16.4	430.201	-	-	No	0	1	9.84	169.57	0	FALSE	-	3-4-0-0-0		HexNAc-(Hex-)Hex-(Hex-)Hex-HexNAc-HexNAc+Hex	Hex-HexNAc-Hex-(Hex-)Hex-HexNAc-HexNAc+Hex	HexNAc-Hex-(Hex-Hex-)Hex-HexNAc-HexNAc+Hex
					559	550	908.91	908.406	2	1814.8	16.41	507.267	-	-	No	0	1	63.22	0	0	FALSE	-	2-3-0-0-0		Hex-(Hex-)Hex-HexNAc-HexNAc+Hex
					562	561	679.949	679.949	3	2036.82	16.44	607.824	-	-	No	0	1	106.54	0	0	FALSE	-	2-3-0-0-0		Hex-(Hex-)Hex-HexNAc-HexNAc+Hex
					564	561	973.404	973.404	2	1944.79	16.45	924.817	-	-	No	0	1	100.38	0	0	FALSE	-	2-3-0-0-0		Hex-(Hex-)Hex-HexNAc-HexNAc+Hex
					566	561	1161.65	1161.45	5	5802.21	16.46	915.38	-	-	No	0	1	14.2	380.37	0	FALSE	-	2-11-1-0-0		Hex-Hex-Hex-Hex-Hex-Hex-Hex-Hex-(Hex-Hex-)Hex-HexNAc-(DeHex-)HexNAc+Hex	Hex-Hex-Hex-Hex-Hex-Hex-Hex-(Hex-Hex-Hex-)Hex-HexNAc-(DeHex-)HexNAc+Hex	Hex-Hex-Hex-Hex-Hex-Hex-(Hex-Hex-Hex-Hex-)Hex-HexNAc-(DeHex-)HexNAc+Hex	Hex-Hex-Hex-Hex-Hex-Hex-Hex-Hex-Hex-(Hex-)Hex-HexNAc-(DeHex-)HexNAc+Hex	Hex-Hex-Hex-Hex-Hex-(Hex-Hex-Hex-Hex-Hex-)Hex-HexNAc-(DeHex-)HexNAc+Hex
					568	561	869.925	869.925	2	1737.83	16.47	475.878	-	-	No	0	1	105.29	0	0	FALSE	-	2-3-0-0-0		Hex-(Hex-)Hex-HexNAc-HexNAc+Hex
					570	561	799.395	798.388	2	1594.76	16.48	430.201	-	-	No	0	1	102.21	0	0	FALSE	-	2-3-1-0-0		Hex-(Hex-)Hex-HexNAc-(DeHex-)HexNAc+Hex	Hex-(Hex-)Hex-HexNAc-HexNAc+Hex
					573	572	818.87	818.87	2	1635.72	16.5	766.715	-	-	No	0	1	100.44	0	0	FALSE	-	2-3-0-0-0		Hex-(Hex-)Hex-HexNAc-HexNAc+Hex	Hex-(Hex-)Hex-HexNAc-(DeHex-)HexNAc+Hex
					575	572	940.069	939.736	3	2816.18	16.51	560.737	-	-	No	0	1	100.28	0.13	0	FALSE	-	3-3-1-0-0		DeHex-HexNAc-Hex-(Hex-)Hex-HexNAc-HexNAc+Hex
					579	572	1037.11	1036.44	3	3106.3	16.53	320.657	-	-	No	0	1	14.3	100	0	FALSE	-	2-4-0-0-0		Hex-(Hex-Hex-)Hex-HexNAc-HexNAc+Hex	Hex-Hex-(Hex-)Hex-HexNAc-HexNAc+Hex
					581	572	1129.44	1129.44	5	5642.16	16.55	1077.7	-	-	No	0	1	135.12	213.27	0	FALSE	-	3-5-0-0-0		Hex-Hex-Hex-(HexNAc-Hex-)Hex-HexNAc-HexNAc+Hex	HexNAc-Hex-Hex-Hex-(Hex-)Hex-HexNAc-HexNAc+Hex
					584	583	671.983	671.311	3	2010.91	16.57	886.754	-	-	No	0	1	104.84	0	0	FALSE	-	2-3-0-0-0		Hex-(Hex-)Hex-HexNAc-HexNAc+Hex
					586	583	678.321	677.986	3	2030.94	16.58	910.275	-	-	No	0	1	101	0	0	FALSE	-	2-3-0-0-0		Hex-(Hex-)Hex-HexNAc-HexNAc+Hex
					588	583	668.976	668.976	3	2003.91	16.59	616.853	-	-	No	0	1	117.89	0	0	FALSE	-	2-3-0-0-0		Hex-(Hex-)Hex-HexNAc-HexNAc+Hex
					590	583	790.637	790.637	3	2368.89	16.6	647.018	-	-	No	0	1	103.96	0	0	FALSE	-	2-3-1-0-0		Hex-(Hex-)Hex-HexNAc-(DeHex-)HexNAc+Hex
					592	583	813.394	812.899	2	1623.78	16.61	803.319	-	-	No	0	1	25.23	0	0	FALSE	-	2-3-0-0-0		Hex-(Hex-)Hex-HexNAc-HexNAc+Hex	Hex-(Hex-)Hex-HexNAc-(DeHex-)HexNAc+Hex
					595	594	777.374	776.368	2	1550.72	16.63	1282.62	-	-	No	0	1	65.76	0	0	FALSE	-	2-3-0-0-0		Hex-(Hex-)Hex-HexNAc-HexNAc+Hex
					597	594	847.912	847.912	2	1693.81	16.64	612.635	-	-	No	0	1	55.01	0	0	FALSE	-	2-3-1-0-0		Hex-(Hex-)Hex-HexNAc-(DeHex-)HexNAc+Hex	Hex-(Hex-)Hex-HexNAc-HexNAc+Hex
					599	594	816.365	816.365	2	1630.71	16.65	587.292	-	-	No	0	1	84.3	0	0	FALSE	-	2-3-0-0-0		Hex-(Hex-)Hex-HexNAc-HexNAc+Hex
					601	594	895.422	894.417	2	1786.82	16.67	841.863	-	-	No	0	1	130.31	0	0	FALSE	-	2-3-0-0-0		Hex-(Hex-)Hex-HexNAc-HexNAc+Hex
					603	594	959.78	959.449	3	2875.32	16.68	410.953	-	-	No	0	1	1.63	179.53	0	FALSE	-	5-3-2-0-0		DeHex-HexNAc-(HexNAc-)Hex-(HexNAc-Hex-)Hex-HexNAc-(DeHex-)HexNAc+Hex	HexNAc-(DeHex-HexNAc-)Hex-(HexNAc-Hex-)Hex-HexNAc-(DeHex-)HexNAc+Hex	HexNAc-(HexNAc-)Hex-(DeHex-HexNAc-Hex-)Hex-HexNAc-(DeHex-)HexNAc+Hex
					606	605	663.345	663.345	2	1324.68	16.7	654.655	-	-	No	0	1	104.6	0	0	FALSE	-	2-3-0-0-0		Hex-(Hex-)Hex-HexNAc-HexNAc+Hex
					610	605	837.402	837.402	2	1672.79	16.72	520.786	-	-	No	0	1	101.59	0	0	FALSE	-	2-3-0-0-0		Hex-(Hex-)Hex-HexNAc-HexNAc+Hex
					612	605	967.402	966.9	2	1931.79	16.73	914.77	-	-	No	0	1	100.33	0	0	FALSE	-	2-3-0-0-0		Hex-(Hex-)Hex-HexNAc-HexNAc+Hex
					614	605	1015.94	1015.44	2	2028.87	16.74	983.895	-	-	No	0	1	103.52	0	0	FALSE	-	2-3-0-0-0		Hex-(Hex-)Hex-HexNAc-HexNAc+Hex
					617	616	762.363	761.865	2	1521.71	16.76	618.074	-	-	No	0	1	100.83	0	0	FALSE	-	2-3-0-0-0		Hex-(Hex-)Hex-HexNAc-HexNAc+Hex
					619	616	732.295	731.963	3	2192.87	16.78	515.579	-	-	No	0	0.88	103.88	0.28	0	FALSE	-	2-5-0-0-0		Hex-Hex-Hex-(Hex-)Hex-HexNAc-HexNAc+Hex	Hex-Hex-(Hex-Hex-)Hex-HexNAc-HexNAc+Hex
					621	616	659.626	659.626	3	1975.86	16.79	606.685	-	-	No	0	1	115.32	0	0	FALSE	-	2-3-0-0-0		Hex-(Hex-)Hex-HexNAc-HexNAc+Hex
					623	616	841.384	839.889	2	1677.76	16.8	788.273	-	-	No	0	1	100.44	0	0	FALSE	-	2-3-0-0-0		Hex-(Hex-)Hex-HexNAc-HexNAc+Hex
					625	616	766.345	765.341	2	1528.67	16.81	629.432	-	-	No	0	1	154.61	0	0	FALSE	-	2-3-0-0-0		Hex-(Hex-)Hex-HexNAc-HexNAc+Hex
					628	627	674.628	674.628	3	2020.86	16.83	604.884	-	-	No	0	1	100.11	0	0	FALSE	-	2-3-0-0-0		Hex-(Hex-)Hex-HexNAc-HexNAc+Hex	Hex-(Hex-)Hex-HexNAc-(DeHex-)HexNAc+Hex
					632	627	650.268	650.268	2	1298.52	16.85	852.649	-	-	No	0	1	100.63	0	0	FALSE	-	2-3-0-0-0		Hex-(Hex-)Hex-HexNAc-HexNAc+Hex
					634	627	1011.44	1011.44	2	2020.86	16.86	906.807	-	-	No	0	1	100.14	0	0	FALSE	-	2-3-0-0-0		Hex-(Hex-)Hex-HexNAc-HexNAc+Hex
					636	627	988.086	987.75	3	2960.23	16.87	515.579	-	-	No	1	0.8	9.52	162.94	-1	TRUE	-	5-6-1-0-0	1-0-0-0-0	Hex-Hex-(HexNAc-)Hex-(Hex-(HexNAc-)Hex-)Hex-HexNAc-(DeHex-)HexNAc+Hex1	Hex-HexNAc-(Hex-)Hex-(Hex-(HexNAc-)Hex-)Hex-HexNAc-(DeHex-)HexNAc+Hex1	Hex-Hex-Hex-Hex-(HexNAc-(HexNAc-)Hex-)Hex-HexNAc-(DeHex-)HexNAc+Hex1	Hex-Hex-(Hex-)Hex-(HexNAc-(HexNAc-)Hex-)Hex-HexNAc-(DeHex-)HexNAc+Hex1
					639	638	705.313	705.313	2	1408.61	16.89	470.973	-	-	No	0	1	100.82	0	0	FALSE	-	2-3-0-0-0		Hex-(Hex-)Hex-HexNAc-HexNAc+Hex
					641	638	733.833	733.833	2	1465.65	16.9	515.579	-	-	No	0	1	103.5	0	0	FALSE	-	2-3-0-0-0		Hex-(Hex-)Hex-HexNAc-HexNAc+Hex
					643	638	915.866	915.866	2	1829.72	16.91	867.303	-	-	No	0	1	104.4	0	0	FALSE	-	2-3-0-0-0		Hex-(Hex-)Hex-HexNAc-HexNAc+Hex
					645	638	880.417	879.407	2	1756.8	16.92	1071.67	-	-	No	0	1	101.8	0	0	FALSE	-	2-3-1-0-0		Hex-(Hex-)Hex-HexNAc-(DeHex-)HexNAc+Hex	Hex-(Hex-)Hex-HexNAc-HexNAc+Hex
					647	638	1411.55	1411.05	2	2820.08	16.93	759.623	-	-	No	0	1	59.93	166.2	0	FALSE	-	3-5-0-0-0		Hex-Hex-Hex-(HexNAc-Hex-)Hex-HexNAc-HexNAc+Hex	HexNAc-Hex-Hex-Hex-(Hex-)Hex-HexNAc-HexNAc+Hex
					650	649	687.293	687.293	2	1372.57	16.95	576.258	-	-	No	0	1	113.05	0	0	FALSE	-	2-3-1-0-0		Hex-(Hex-)Hex-HexNAc-(DeHex-)HexNAc+Hex	Hex-(Hex-)Hex-HexNAc-HexNAc+Hex
					654	649	822.36	822.028	3	2463.06	16.98	458.194	-	-	No	0	1	10.73	176.62	0	FALSE	-	4-4-1-0-0		Hex-(HexNAc-)Hex-(HexNAc-Hex-)Hex-HexNAc-(DeHex-)HexNAc+Hex	Hex-Hex-(HexNAc-(HexNAc-)Hex-)Hex-HexNAc-(DeHex-)HexNAc+Hex
					656	649	729.66	729.66	3	2185.96	16.99	353.186	-	-	No	0	1	111.58	0	0	FALSE	-	2-3-0-0-0		Hex-(Hex-)Hex-HexNAc-HexNAc+Hex	Hex-(Hex-)Hex-HexNAc-(DeHex-)HexNAc+Hex
					661	660	710.981	710.647	3	2128.92	17.02	255.62	-	-	No	0	1	2.4	113.6	0	FALSE	-	3-4-1-1-0		NeuAc-Hex-HexNAc-Hex-(Hex-)Hex-HexNAc-(DeHex-)HexNAc+Hex
					663	660	736.835	736.835	2	1471.65	17.03	728.109	-	-	No	0	1	108.55	0	0	FALSE	-	2-3-0-0-0		Hex-(Hex-)Hex-HexNAc-HexNAc+Hex	Hex-(Hex-)Hex-HexNAc-(DeHex-)HexNAc+Hex
					665	660	745.878	745.878	2	1489.74	17.04	693.699	-	-	No	0	1	100.33	0	0	FALSE	-	2-3-0-0-0		Hex-(Hex-)Hex-HexNAc-HexNAc+Hex
					667	660	722.678	722.343	3	2164.01	17.05	738.78	-	-	No	0	0.97	147.01	0	0	FALSE	-	2-3-0-0-0		Hex-(Hex-)Hex-HexNAc-HexNAc+Hex
					669	660	935.472	935.472	2	1868.93	17.06	883.645	-	-	No	0	1	31.53	0	0	FALSE	-	2-3-1-0-0		Hex-(Hex-)Hex-HexNAc-(DeHex-)HexNAc+Hex	Hex-(Hex-)Hex-HexNAc-HexNAc+Hex
					672	671	699.332	699.332	2	1396.65	17.08	288.633	-	-	No	0	1	55.27	0	0	FALSE	-	2-3-0-0-0		Hex-(Hex-)Hex-HexNAc-HexNAc+Hex
					674	671	754.866	754.362	2	1506.71	17.09	705.763	-	-	No	0	1	101.43	0	0	FALSE	-	2-3-0-0-0		Hex-(Hex-)Hex-HexNAc-HexNAc+Hex
					676	671	888.016	887.342	3	2659	17.1	553.286	-	-	No	0	1	100.7	2.54	0	FALSE	-	2-4-0-0-0		Hex-Hex-(Hex-)Hex-HexNAc-HexNAc+Hex	Hex-(Hex-Hex-)Hex-HexNAc-HexNAc+Hex
					678	671	716.309	716.309	2	1430.6	17.11	663.656	-	-	No	0	1	125.14	0	0	FALSE	-	2-3-0-0-0		Hex-(Hex-)Hex-HexNAc-HexNAc+Hex
					680	671	760.384	760.384	2	1518.75	17.12	386.301	-	-	No	0	1	120.32	0	0	FALSE	-	2-3-0-0-0		Hex-(Hex-)Hex-HexNAc-HexNAc+Hex
					683	682	666.014	665.264	4	2657.03	17.14	587.255	-	-	No	0	1	100.56	0.04	0	FALSE	-	3-3-0-0-0		Hex-(HexNAc-Hex-)Hex-HexNAc-HexNAc+Hex	HexNAc-Hex-(Hex-)Hex-HexNAc-HexNAc+Hex
					685	682	770.335	770.335	2	1538.66	17.15	761.773	-	-	No	0	1	103.72	0	0	FALSE	-	2-3-0-0-0		Hex-(Hex-)Hex-HexNAc-HexNAc+Hex
					687	682	831.007	830.674	3	2489	17.16	450.725	-	-	No	0	1	100.53	0.79	0	FALSE	-	2-7-0-0-0		Hex-Hex-Hex-(Hex-Hex-Hex-)Hex-HexNAc-HexNAc+Hex	Hex-Hex-Hex-Hex-Hex-(Hex-)Hex-HexNAc-HexNAc+Hex	Hex-Hex-Hex-Hex-(Hex-Hex-)Hex-HexNAc-HexNAc+Hex
					689	682	1117.97	1117.97	2	2233.93	17.17	1018.7	-	-	No	0	1	113.25	0	-3	TRUE	-	3-5-0-0-0	1-2-0-0-0	Hex-(Hex-)Hex-HexNAc-HexNAc+Hex1HexNAc2
					691	682	1370.79	1370.54	4	5478.12	17.18	1273.51	-	-	No	0	1	165.85	227.35	0	FALSE	-	2-8-0-0-0		Hex-Hex-Hex-Hex-(Hex-Hex-Hex-)Hex-HexNAc-HexNAc+Hex	Hex-Hex-Hex-Hex-Hex-Hex-(Hex-)Hex-HexNAc-HexNAc+Hex	Hex-Hex-Hex-Hex-Hex-(Hex-Hex-)Hex-HexNAc-HexNAc+Hex	Hex-Hex-Hex-(Hex-Hex-Hex-Hex-)Hex-HexNAc-HexNAc+Hex
					694	693	773.345	773.345	3	2317.01	17.2	263.14	-	-	No	0	1	10.78	217.2	0	FALSE	-	5-3-2-0-0		HexNAc-(DeHex-HexNAc-)Hex-(DeHex-HexNAc-Hex-)Hex-HexNAc-HexNAc+Hex	DeHex-HexNAc-(DeHex-HexNAc-)Hex-(HexNAc-Hex-)Hex-HexNAc-HexNAc+Hex	DeHex-HexNAc-(HexNAc-)Hex-(DeHex-HexNAc-Hex-)Hex-HexNAc-HexNAc+Hex
					696	693	719.383	719.383	2	1436.75	17.21	597.327	-	-	No	0	1	73.86	0	0	FALSE	-	2-3-0-0-0		Hex-(Hex-)Hex-HexNAc-HexNAc+Hex
					700	693	964.913	964.913	2	1927.81	17.23	586.247	-	-	No	0	1	70.76	0	0	FALSE	-	2-3-0-0-0		Hex-(Hex-)Hex-HexNAc-HexNAc+Hex	Hex-(Hex-)Hex-HexNAc-(DeHex-)HexNAc+Hex
					702	693	976.925	976.925	2	1951.84	17.24	579.986	-	-	No	0	1	218.85	0	0	FALSE	-	2-3-1-0-0		Hex-(Hex-)Hex-HexNAc-(DeHex-)HexNAc+Hex
					707	704	693.346	693.346	2	1384.68	17.27	684.768	-	-	No	0	1	118.74	0	0	FALSE	-	2-3-0-0-0		Hex-(Hex-)Hex-HexNAc-HexNAc+Hex
					709	704	748.297	748.297	2	1494.58	17.28	695.141	-	-	No	0	1	104.44	0	0	FALSE	-	2-3-0-0-0		Hex-(Hex-)Hex-HexNAc-HexNAc+Hex
					713	704	828.344	827.85	2	1653.68	17.3	775.652	-	-	No	0	1	100.97	0	0	FALSE	-	2-3-0-0-0		Hex-(Hex-)Hex-HexNAc-HexNAc+Hex
					716	715	768.386	767.886	2	1533.76	17.32	736.246	-	-	No	0	1	103.18	0	0	FALSE	-	2-3-0-0-0		Hex-(Hex-)Hex-HexNAc-HexNAc+Hex
					722	715	1094.49	1094.49	2	2186.97	17.36	547.268	-	-	No	0	1	5.06	102.31	0	FALSE	-	3-4-0-0-0		HexNAc-(Hex-)Hex-(Hex-)Hex-HexNAc-HexNAc+Hex	Hex-HexNAc-Hex-(Hex-)Hex-HexNAc-HexNAc+Hex	HexNAc-Hex-(Hex-Hex-)Hex-HexNAc-HexNAc+Hex
					724	715	896.405	895.912	2	1789.81	17.37	844.275	-	-	No	0	1	100.79	0	0	FALSE	-	2-3-0-0-0		Hex-(Hex-)Hex-HexNAc-HexNAc+Hex
					727	726	683.64	683.306	3	2046.89	17.39	847.301	-	-	No	0	1	104.43	0	0	FALSE	-	2-3-0-0-0		Hex-(Hex-)Hex-HexNAc-HexNAc+Hex
					729	726	784.339	784.339	3	2350	17.4	749.688	-	-	No	0	1	104.57	0.05	0	FALSE	-	2-4-0-0-0		Hex-Hex-(Hex-)Hex-HexNAc-HexNAc+Hex	Hex-(Hex-Hex-)Hex-HexNAc-HexNAc+Hex
					731	726	708.007	707.676	3	2120.01	17.41	655.117	-	-	No	0	1	102.21	0	0	FALSE	-	2-3-0-0-0		Hex-(Hex-)Hex-HexNAc-HexNAc+Hex
					733	726	853.465	853.465	2	1704.91	17.42	784.337	-	-	No	0	1	89.01	0	0	FALSE	-	2-3-0-0-0		Hex-(Hex-)Hex-HexNAc-HexNAc+Hex
					735	726	786.852	786.852	2	1571.69	17.43	734.687	-	-	No	0	1	102.26	0	0	FALSE	-	2-3-0-0-0		Hex-(Hex-)Hex-HexNAc-HexNAc+Hex
					738	737	922.432	921.926	2	1841.84	17.45	342.911	-	-	No	0	1	101.04	0	0	FALSE	-	2-3-0-0-0		Hex-(Hex-)Hex-HexNAc-HexNAc+Hex
					740	737	781.439	781.439	2	1560.86	17.47	653.693	-	-	No	0	1	107.24	0	0	FALSE	-	2-3-0-0-0		Hex-(Hex-)Hex-HexNAc-HexNAc+Hex
					742	737	689.331	689.331	3	2064.97	17.48	636.998	-	-	No	0	1	101.84	0	0	FALSE	-	2-3-0-0-0		Hex-(Hex-)Hex-HexNAc-HexNAc+Hex
					744	737	956.42	955.926	2	1909.84	17.49	611.603	-	-	No	0	1	125.81	0	0	FALSE	-	2-3-1-0-0		Hex-(Hex-)Hex-HexNAc-(DeHex-)HexNAc+Hex	Hex-(Hex-)Hex-HexNAc-HexNAc+Hex
					746	737	778.696	778.696	3	2333.07	17.5	822.787	-	-	No	0	0.99	127.6	0	0	FALSE	-	2-3-0-0-0		Hex-(Hex-)Hex-HexNAc-HexNAc+Hex
					749	748	1075.51	1075.02	2	2148.02	17.52	738.755	-	-	No	0	1	279.65	0	0	FALSE	-	2-3-0-0-0		Hex-(Hex-)Hex-HexNAc-HexNAc+Hex	Hex-(Hex-)Hex-HexNAc-(DeHex-)HexNAc+Hex
					751	748	859.393	858.894	2	1715.77	17.54	799.519	-	-	No	0	1	102.92	0	0	FALSE	-	2-3-0-0-0		Hex-(Hex-)Hex-HexNAc-HexNAc+Hex
					753	748	937.434	937.434	2	1872.85	17.55	1042.6	-	-	No	0	1	102.89	0	0	FALSE	-	2-3-0-0-0		Hex-(Hex-)Hex-HexNAc-HexNAc+Hex	Hex-(Hex-)Hex-HexNAc-(DeHex-)HexNAc+Hex
					755	748	1066.46	1065.47	2	2128.93	17.56	665.421	-	-	No	0	1	139.19	0	0	FALSE	-	2-3-0-0-0		Hex-(Hex-)Hex-HexNAc-HexNAc+Hex
					757	748	1184.96	1184.45	2	2366.89	17.57	989.521	-	-	No	0	1	156.54	0	0	FALSE	-	2-3-0-0-0		Hex-(Hex-)Hex-HexNAc-HexNAc+Hex
					760	759	653.359	653.359	2	1304.7	17.59	644.618	-	-	No	0	1	101.98	0	0	FALSE	-	2-3-0-0-0		Hex-(Hex-)Hex-HexNAc-HexNAc+Hex
					762	759	901.961	901.961	2	1801.91	17.6	884.82	-	-	No	0	1	111.1	0	0	FALSE	-	2-3-1-0-0		Hex-(Hex-)Hex-HexNAc-(DeHex-)HexNAc+Hex	Hex-(Hex-)Hex-HexNAc-HexNAc+Hex
					764	759	824.376	824.376	2	1646.74	17.61	772.186	-	-	No	0	1	138.34	0	0	FALSE	-	2-3-0-0-0		Hex-(Hex-)Hex-HexNAc-HexNAc+Hex
					766	759	841.348	841.348	2	1680.68	17.62	525.272	-	-	No	0	1	100.25	0	0	FALSE	-	2-3-0-0-0		Hex-(Hex-)Hex-HexNAc-HexNAc+Hex
					768	759	932.41	931.908	2	1861.8	17.63	879.792	-	-	No	0	1	100.19	0	0	FALSE	-	2-3-0-0-0		Hex-(Hex-)Hex-HexNAc-HexNAc+Hex
					771	770	804.355	804.021	3	2409.04	17.65	648.291	-	-	No	0	1	100.56	0	0	FALSE	-	2-3-1-0-0		Hex-(Hex-)Hex-HexNAc-(DeHex-)HexNAc+Hex	Hex-(Hex-)Hex-HexNAc-HexNAc+Hex
					773	770	696.326	696.326	2	1390.64	17.66	647.387	-	-	No	0	1	109.23	0	0	FALSE	-	2-3-0-0-0		Hex-(Hex-)Hex-HexNAc-HexNAc+Hex
					775	770	1033.42	1032.91	2	2063.82	17.67	980.721	-	-	No	0	1	100.3	0	0	FALSE	-	2-3-0-0-0		Hex-(Hex-)Hex-HexNAc-HexNAc+Hex
					777	770	807.325	806.827	2	1611.64	17.68	696.614	-	-	No	0	1	108.01	0	0	FALSE	-	2-3-0-0-0		Hex-(Hex-)Hex-HexNAc-HexNAc+Hex
					779	770	1001.98	1001.98	2	2001.95	17.69	1272.77	-	-	No	0	1	116.91	0	0	FALSE	-	2-3-0-0-0		Hex-(Hex-)Hex-HexNAc-HexNAc+Hex
					782	781	888.923	888.923	2	1775.83	17.71	818.051	-	-	No	0	1	102.93	0	0	FALSE	-	2-3-0-0-0		Hex-(Hex-)Hex-HexNAc-HexNAc+Hex
					784	781	1009.38	1009.05	3	3024.12	17.72	833.245	-	-	No	0	1	226.04	0	0	FALSE	-	2-3-0-0-0		Hex-(Hex-)Hex-HexNAc-HexNAc+Hex
					786	781	814.373	814.373	2	1626.73	17.73	459.728	-	-	No	0	1	91.23	0	0	FALSE	-	2-3-0-0-0		Hex-(Hex-)Hex-HexNAc-HexNAc+Hex
					788	781	856.911	856.911	2	1711.81	17.74	784.166	-	-	No	0	1	103.31	0	0	FALSE	-	2-3-0-0-0		Hex-(Hex-)Hex-HexNAc-HexNAc+Hex
					790	781	745.874	745.374	2	1488.73	17.76	693.23	-	-	No	0	1	107.35	0	0	FALSE	-	2-3-0-0-0		Hex-(Hex-)Hex-HexNAc-HexNAc+Hex
					793	792	941.907	941.407	2	1880.8	17.77	788.515	-	-	No	0	1	23.34	0	0	FALSE	-	2-3-0-0-0		Hex-(Hex-)Hex-HexNAc-HexNAc+Hex
					795	792	845.363	844.367	2	1686.72	17.79	447.864	-	-	No	0	1	109.13	0	0	FALSE	-	2-3-0-0-0		Hex-(Hex-)Hex-HexNAc-HexNAc+Hex
					797	792	1132.99	1132.49	2	2262.96	17.8	1115.3	-	-	No	0	1	110.12	0	0	FALSE	-	2-3-1-0-0		Hex-(Hex-)Hex-HexNAc-(DeHex-)HexNAc+Hex	Hex-(Hex-)Hex-HexNAc-HexNAc+Hex
					799	792	877.039	876.711	3	2627.11	17.81	377.401	-	-	No	0	1	3.89	67.71	0	FALSE	-	3-3-0-0-0		Hex-(HexNAc-Hex-)Hex-HexNAc-HexNAc+Hex	HexNAc-Hex-(Hex-)Hex-HexNAc-HexNAc+Hex
					801	792	1171.39	1170.39	2	2338.76	17.83	1118.29	-	-	No	0	1	100.16	0	0	FALSE	-	2-3-0-0-0		Hex-(Hex-)Hex-HexNAc-HexNAc+Hex
					804	803	1050.95	1050.44	2	2098.87	17.85	1360.71	-	-	No	0	1	102.86	0	0	FALSE	-	2-3-0-0-0		Hex-(Hex-)Hex-HexNAc-HexNAc+Hex
					806	803	991.964	991.461	2	1980.91	17.86	886.818	-	-	No	0	1	100.58	0	0	FALSE	-	2-3-0-0-0		Hex-(Hex-)Hex-HexNAc-HexNAc+Hex	Hex-(Hex-)Hex-HexNAc-(DeHex-)HexNAc+Hex
					808	803	685.356	685.356	3	2053.05	17.87	575.32	-	-	No	0	1	137.4	0	0	FALSE	-	2-3-1-0-0		Hex-(Hex-)Hex-HexNAc-(DeHex-)HexNAc+Hex	Hex-(Hex-)Hex-HexNAc-HexNAc+Hex
					810	803	910.457	910.457	2	1818.9	17.89	858.323	-	-	No	0	1	100.33	0	0	FALSE	-	2-3-0-0-0		Hex-(Hex-)Hex-HexNAc-HexNAc+Hex
					812	803	860.397	859.898	2	1717.78	17.9	573.266	-	-	No	0	1	52.99	0	0	FALSE	-	2-3-1-0-0		Hex-(Hex-)Hex-HexNAc-(DeHex-)HexNAc+Hex	Hex-(Hex-)Hex-HexNAc-HexNAc+Hex
					815	814	661.645	661.309	3	1980.91	17.92	523.227	-	-	No	0	1	101.02	0	0	FALSE	-	2-3-0-0-0		Hex-(Hex-)Hex-HexNAc-HexNAc+Hex	Hex-(Hex-)Hex-HexNAc-(DeHex-)HexNAc+Hex
					817	814	725.84	723.346	2	1444.68	17.93	673.62	-	-	No	0	1	100.33	0	0	FALSE	-	2-3-0-0-0		Hex-(Hex-)Hex-HexNAc-HexNAc+Hex
					819	814	884.408	884.074	3	2649.2	17.94	849.624	-	-	No	0	0.98	100.85	0	0	FALSE	-	2-3-0-0-0		Hex-(Hex-)Hex-HexNAc-HexNAc+Hex	Hex-(Hex-)Hex-HexNAc-(DeHex-)HexNAc+Hex
					821	814	1255.57	1255.05	2	2508.09	17.95	892.525	-	-	No	0	1	164.06	0	0	FALSE	-	2-3-0-0-0		Hex-(Hex-)Hex-HexNAc-HexNAc+Hex	Hex-(Hex-)Hex-HexNAc-(DeHex-)HexNAc+Hex
					823	814	918.428	917.92	2	1833.83	17.96	1120.67	-	-	No	0	1	106.65	0	0	FALSE	-	2-3-1-0-0		Hex-(Hex-)Hex-HexNAc-(DeHex-)HexNAc+Hex	Hex-(Hex-)Hex-HexNAc-HexNAc+Hex
					826	825	799.876	799.876	2	1597.74	17.98	451.876	-	-	No	0	1	144.41	0	0	FALSE	-	2-3-0-0-0		Hex-(Hex-)Hex-HexNAc-HexNAc+Hex	Hex-(Hex-)Hex-HexNAc-(DeHex-)HexNAc+Hex
					828	825	1266.55	1266.05	2	2530.08	17.99	558.927	-	-	No	0	1	116.15	8.26	0	FALSE	-	2-5-0-0-0		Hex-Hex-Hex-(Hex-)Hex-HexNAc-HexNAc+Hex	Hex-Hex-(Hex-Hex-)Hex-HexNAc-HexNAc+Hex
					830	825	873.9	873.9	2	1745.79	18	838.592	-	-	No	0	1	12.98	0	0	FALSE	-	2-3-0-0-0		Hex-(Hex-)Hex-HexNAc-HexNAc+Hex
					834	825	983.075	982.408	3	2944.2	18.03	723.711	-	-	No	0	0.91	213.04	148.56	-1	TRUE	-	2-8-0-0-0	0-1-0-0-0	Hex-Hex-Hex-Hex-Hex-(Hex-)Hex-HexNAc-HexNAc+HexNAc1	Hex-Hex-Hex-Hex-(Hex-Hex-)Hex-HexNAc-HexNAc+HexNAc1	Hex-Hex-Hex-(Hex-Hex-Hex-)Hex-HexNAc-HexNAc+HexNAc1
					837	836	740.35	739.68	3	2216.02	18.04	439.937	-	-	No	0	1	100.68	0	0	FALSE	-	2-3-0-0-0		Hex-(Hex-)Hex-HexNAc-HexNAc+Hex	Hex-(Hex-)Hex-HexNAc-(DeHex-)HexNAc+Hex
					839	836	752.365	752.365	2	1502.71	18.06	700.076	-	-	No	0	1	101.08	0	0	FALSE	-	2-3-0-0-0		Hex-(Hex-)Hex-HexNAc-HexNAc+Hex
					841	836	1097.92	1097.42	2	2192.82	18.07	1302.66	-	-	No	0	1	128.36	0	0	FALSE	-	2-3-0-0-0		Hex-(Hex-)Hex-HexNAc-HexNAc+Hex
					843	836	850.031	849.693	3	2546.06	18.08	797.667	-	-	No	0	1	102.17	0	0	FALSE	-	2-3-0-0-0		Hex-(Hex-)Hex-HexNAc-HexNAc+Hex	Hex-(Hex-)Hex-HexNAc-(DeHex-)HexNAc+Hex
					845	836	975.178	974.67	2	1947.33	18.09	943.968	-	-	No	0	1	44.86	0	0	FALSE	-	2-3-0-0-0		Hex-(Hex-)Hex-HexNAc-HexNAc+Hex	Hex-(Hex-)Hex-HexNAc-(DeHex-)HexNAc+Hex
					848	847	672.765	672.265	4	2685.03	18.11	594.159	-	-	No	0	1	101.11	0	0	FALSE	-	2-3-0-0-0		Hex-(Hex-)Hex-HexNAc-HexNAc+Hex	Hex-(Hex-)Hex-HexNAc-(DeHex-)HexNAc+Hex
					850	847	1104	1103.49	2	2204.97	18.13	901.651	-	-	No	0	1	119.79	0	0	FALSE	-	2-3-0-0-0		Hex-(Hex-)Hex-HexNAc-HexNAc+Hex
					852	847	668.325	667.988	3	2000.94	18.14	633.684	-	-	No	0	1	112.85	0	0	FALSE	-	2-3-1-0-0		Hex-(Hex-)Hex-HexNAc-(DeHex-)HexNAc+Hex
					854	847	791.379	791.379	2	1580.74	18.15	739.142	-	-	No	0	1	100.51	0	0	FALSE	-	2-3-0-0-0		Hex-(Hex-)Hex-HexNAc-HexNAc+Hex
					856	847	834.373	834.373	2	1666.73	18.16	627.628	-	-	No	0	1	86.75	0	0	FALSE	-	2-3-0-0-0		Hex-(Hex-)Hex-HexNAc-HexNAc+Hex
					859	858	870.393	869.891	2	1737.77	18.18	817.74	-	-	No	0	1	100.13	0	0	FALSE	-	2-3-0-0-0		Hex-(Hex-)Hex-HexNAc-HexNAc+Hex
					861	858	1061.43	1061.43	2	2120.84	18.19	1009.18	-	-	No	0	1	100.77	0	0	FALSE	-	2-3-0-0-0		Hex-(Hex-)Hex-HexNAc-HexNAc+Hex
					863	858	979.396	979.396	3	2935.17	18.2	612.635	-	-	No	0	0.98	0.13	100	0	FALSE	-	2-4-1-0-0		Hex-(Hex-Hex-)Hex-HexNAc-(DeHex-)HexNAc+Hex	Hex-Hex-(Hex-)Hex-HexNAc-(DeHex-)HexNAc+Hex
					865	858	760.366	760.366	2	1518.72	18.21	707.828	-	-	No	0	1	102.87	0	0	FALSE	-	2-3-0-0-0		Hex-(Hex-)Hex-HexNAc-HexNAc+Hex
					867	858	866.413	866.413	2	1730.81	18.22	447.864	-	-	No	0	1	106.41	0	0	FALSE	-	2-3-0-0-0		Hex-(Hex-)Hex-HexNAc-HexNAc+Hex
					870	869	712.873	712.873	2	1423.73	18.24	496.466	-	-	No	0	1	16.79	0	0	FALSE	-	2-3-0-0-0		Hex-(Hex-)Hex-HexNAc-HexNAc+Hex
					872	869	680.82	680.82	2	1359.63	18.25	646.121	-	-	No	0	1	103.12	0	0	FALSE	-	2-3-0-0-0		Hex-(Hex-)Hex-HexNAc-HexNAc+Hex
					874	869	893.417	893.417	2	1784.82	18.26	525.272	-	-	No	0	1	108.5	0	0	FALSE	-	2-3-0-0-0		Hex-(Hex-)Hex-HexNAc-HexNAc+Hex	Hex-(Hex-)Hex-HexNAc-(DeHex-)HexNAc+Hex
					876	869	837.375	837.042	3	2508.11	18.27	439.937	-	-	No	0	1	105.85	19.26	-1	TRUE	-	2-7-2-0-0	0-0-1-0-0	Hex-Hex-Hex-Hex-(Hex-Hex-)Hex-HexNAc-(DeHex-)HexNAc+DeHex1	Hex-Hex-Hex-Hex-Hex-(Hex-)Hex-HexNAc-(DeHex-)HexNAc+DeHex1	Hex-Hex-Hex-(Hex-Hex-Hex-)Hex-HexNAc-(DeHex-)HexNAc+DeHex1
					878	869	793.371	793.371	2	1584.73	18.28	465.462	-	-	No	0	1	115.64	0	0	FALSE	-	2-3-0-0-0		Hex-(Hex-)Hex-HexNAc-HexNAc+Hex
					881	880	764.862	764.862	2	1527.71	18.3	755.87	-	-	No	0	1	102.62	0	0	FALSE	-	2-3-0-0-0		Hex-(Hex-)Hex-HexNAc-HexNAc+Hex
					883	880	1078.5	1078	2	2153.99	18.31	1352.63	-	-	No	0	1	102.42	0	0	FALSE	-	2-3-0-0-0		Hex-(Hex-)Hex-HexNAc-HexNAc+Hex	Hex-(Hex-)Hex-HexNAc-(DeHex-)HexNAc+Hex
					885	880	828.896	828.388	2	1654.76	18.32	775.746	-	-	No	0	1	112.27	0	0	FALSE	-	2-3-0-0-0		Hex-(Hex-)Hex-HexNAc-HexNAc+Hex
					887	880	811.853	811.853	2	1621.69	18.33	750.726	-	-	No	0	1	5.6	0	0	FALSE	-	2-3-1-0-0		Hex-(Hex-)Hex-HexNAc-(DeHex-)HexNAc+Hex	Hex-(Hex-)Hex-HexNAc-HexNAc+Hex
					892	891	1154.9	1154.4	2	2306.78	18.36	1001.52	-	-	No	0	1	58.7	0	0	FALSE	-	2-3-0-0-0		Hex-(Hex-)Hex-HexNAc-HexNAc+Hex
					894	891	728.348	728.348	3	2182.02	18.38	502.315	-	-	No	0	1	153.44	0	0	FALSE	-	2-3-0-0-0		Hex-(Hex-)Hex-HexNAc-HexNAc+Hex
					896	891	1012.1	1011.76	3	3032.27	18.39	576.258	-	-	No	0	1	0.46	102.13	0	FALSE	-	3-4-1-0-0		DeHex-HexNAc-Hex-(Hex-Hex-)Hex-HexNAc-HexNAc+Hex	DeHex-HexNAc-(Hex-)Hex-(Hex-)Hex-HexNAc-HexNAc+Hex
					898	891	757.325	756.825	4	3023.27	18.4	677.31	-	-	No	0	1	113.07	0	0	FALSE	-	2-3-1-0-0		Hex-(Hex-)Hex-HexNAc-(DeHex-)HexNAc+Hex
					900	891	675.338	675.338	2	1348.66	18.41	648.807	-	-	No	0	1	127.93	0	0	FALSE	-	2-3-0-0-0		Hex-(Hex-)Hex-HexNAc-HexNAc+Hex
					905	902	962.399	962.399	2	1922.78	18.44	561.306	-	-	No	0	1	105.51	0	0	FALSE	-	2-3-0-0-0		Hex-(Hex-)Hex-HexNAc-HexNAc+Hex	Hex-(Hex-)Hex-HexNAc-(DeHex-)HexNAc+Hex
					907	902	796.377	796.377	3	2386.11	18.45	744.374	-	-	No	0	1	104.37	0	0	FALSE	-	2-3-0-0-0		Hex-(Hex-)Hex-HexNAc-HexNAc+Hex	Hex-(Hex-)Hex-HexNAc-(DeHex-)HexNAc+Hex
					909	902	1017.91	1017.91	2	2033.8	18.46	1000.2	-	-	No	0	1	106.03	0	0	FALSE	-	2-3-0-0-0		Hex-(Hex-)Hex-HexNAc-HexNAc+Hex
					911	902	1124.51	1124.51	2	2247	18.47	475.878	-	-	No	0	1	4.51	112.36	0	FALSE	-	4-4-0-0-0		Hex-Hex-(HexNAc-(HexNAc-)Hex-)Hex-HexNAc-HexNAc+Hex	Hex-(HexNAc-)Hex-(HexNAc-Hex-)Hex-HexNAc-HexNAc+Hex
					914	913	651.287	650.958	3	1949.85	18.5	515.003	-	-	No	0	1	102.11	0	0	FALSE	-	2-3-0-0-0		Hex-(Hex-)Hex-HexNAc-HexNAc+Hex	Hex-(Hex-)Hex-HexNAc-(DeHex-)HexNAc+Hex
					916	913	1084.01	1083.51	2	2165	18.51	1295.58	-	-	No	0	1	103.19	0	0	FALSE	-	2-3-0-0-0		Hex-(Hex-)Hex-HexNAc-HexNAc+Hex
					918	913	880.415	880.415	2	1758.82	18.52	809.754	-	-	No	0	1	102.57	0	0	FALSE	-	2-3-0-0-0		Hex-(Hex-)Hex-HexNAc-HexNAc+Hex	Hex-(Hex-)Hex-HexNAc-(DeHex-)HexNAc+Hex
					920	913	997.612	997.108	4	3984.4	18.53	828.983	-	-	No	0	1	124.49	0	0	FALSE	-	2-3-0-0-0		Hex-(Hex-)Hex-HexNAc-HexNAc+Hex	Hex-(Hex-)Hex-HexNAc-(DeHex-)HexNAc+Hex
					922	913	1092.01	1091.51	2	2181	18.54	1039.31	-	-	No	0	1	111.28	0	0	FALSE	-	2-3-0-0-0		Hex-(Hex-)Hex-HexNAc-HexNAc+Hex
					925	924	736.333	735.998	3	2204.97	18.57	780.758	-	-	No	0	1	157.72	0	0	FALSE	-	2-3-0-0-0		Hex-(Hex-)Hex-HexNAc-HexNAc+Hex	Hex-(Hex-)Hex-HexNAc-(DeHex-)HexNAc+Hex
					927	924	723.006	722.331	3	2163.97	18.58	656.389	-	-	No	0	1	102	0	0	FALSE	-	2-3-0-0-0		Hex-(Hex-)Hex-HexNAc-HexNAc+Hex
					929	924	1189.83	1189.83	3	3566.46	18.59	408.187	-	-	No	0	0.88	2.34	222.32	0	FALSE	-	5-7-3-0-0		Hex-Hex-(Hex-HexNAc-)Hex-(DeHex-HexNAc-Hex-(DeHex-)HexNAc-Hex-)Hex-HexNAc-(DeHex-)HexNAc+Hex	Hex-Hex-Hex-(HexNAc-)Hex-(DeHex-HexNAc-Hex-(DeHex-)HexNAc-Hex-)Hex-HexNAc-(DeHex-)HexNAc+Hex	Hex-Hex-(Hex-(DeHex-)HexNAc-)Hex-(HexNAc-Hex-(DeHex-)HexNAc-Hex-)Hex-HexNAc-(DeHex-)HexNAc+Hex	Hex-(DeHex-)HexNAc-Hex-Hex-Hex-(Hex-HexNAc-(DeHex-HexNAc-)Hex-)Hex-HexNAc-(DeHex-)HexNAc+Hex	Hex-Hex-(Hex-(DeHex-)HexNAc-)Hex-(DeHex-HexNAc-Hex-HexNAc-Hex-)Hex-HexNAc-(DeHex-)HexNAc+Hex	Hex-(DeHex-)HexNAc-Hex-HexNAc-Hex-(Hex-Hex-(DeHex-HexNAc-)Hex-)Hex-HexNAc-(DeHex-)HexNAc+Hex	Hex-HexNAc-(Hex-(DeHex-)HexNAc-)Hex-(DeHex-HexNAc-Hex-Hex-Hex-)Hex-HexNAc-(DeHex-)HexNAc+Hex	HexNAc-Hex-Hex-(Hex-(DeHex-)HexNAc-)Hex-(Hex-(DeHex-HexNAc-)Hex-)Hex-HexNAc-(DeHex-)HexNAc+Hex	Hex-(DeHex-)HexNAc-Hex-Hex-(HexNAc-)Hex-(Hex-(DeHex-HexNAc-)Hex-)Hex-HexNAc-(DeHex-)HexNAc+Hex	Hex-(DeHex-)HexNAc-Hex-HexNAc-(Hex-)Hex-(Hex-(DeHex-HexNAc-)Hex-)Hex-HexNAc-(DeHex-)HexNAc+Hex	Hex-(DeHex-)HexNAc-Hex-Hex-(Hex-)Hex-(HexNAc-(DeHex-HexNAc-)Hex-)Hex-HexNAc-(DeHex-)HexNAc+Hex	Hex-HexNAc-Hex-Hex-Hex-(DeHex-HexNAc-Hex-(DeHex-)HexNAc-Hex-)Hex-HexNAc-(DeHex-)HexNAc+Hex	Hex-(DeHex-)HexNAc-Hex-Hex-Hex-(DeHex-HexNAc-Hex-HexNAc-Hex-)Hex-HexNAc-(DeHex-)HexNAc+Hex	Hex-(DeHex-)HexNAc-Hex-Hex-Hex-(HexNAc-Hex-(DeHex-)HexNAc-Hex-)Hex-HexNAc-(DeHex-)HexNAc+Hex	HexNAc-Hex-Hex-(Hex-)Hex-(DeHex-HexNAc-Hex-(DeHex-)HexNAc-Hex-)Hex-HexNAc-(DeHex-)HexNAc+Hex	Hex-(DeHex-)HexNAc-Hex-HexNAc-Hex-(DeHex-HexNAc-Hex-Hex-Hex-)Hex-HexNAc-(DeHex-)HexNAc+Hex	Hex-HexNAc-Hex-Hex-(DeHex-HexNAc-Hex-(DeHex-)HexNAc-)Hex-(Hex-)Hex-HexNAc-(DeHex-)HexNAc+Hex	Hex-(DeHex-)HexNAc-Hex-Hex-(DeHex-HexNAc-Hex-HexNAc-)Hex-(Hex-)Hex-HexNAc-(DeHex-)HexNAc+Hex	Hex-(DeHex-)HexNAc-Hex-Hex-(HexNAc-Hex-(DeHex-)HexNAc-)Hex-(Hex-)Hex-HexNAc-(DeHex-)HexNAc+Hex	Hex-(DeHex-)HexNAc-Hex-HexNAc-(DeHex-HexNAc-Hex-Hex-)Hex-(Hex-)Hex-HexNAc-(DeHex-)HexNAc+Hex	HexNAc-Hex-Hex-(Hex-)Hex-(Hex-(DeHex-)HexNAc-(DeHex-HexNAc-)Hex-)Hex-HexNAc-(DeHex-)HexNAc+Hex	Hex-(DeHex-)HexNAc-Hex-Hex-Hex-(Hex-(DeHex-)HexNAc-(HexNAc-)Hex-)Hex-HexNAc-(DeHex-)HexNAc+Hex	Hex-(DeHex-)HexNAc-Hex-HexNAc-Hex-(Hex-(DeHex-)HexNAc-(Hex-)Hex-)Hex-HexNAc-(DeHex-)HexNAc+Hex	Hex-HexNAc-(Hex-Hex-)Hex-(DeHex-HexNAc-Hex-(DeHex-)HexNAc-Hex-)Hex-HexNAc-(DeHex-)HexNAc+Hex	Hex-HexNAc-Hex-Hex-Hex-(Hex-(DeHex-)HexNAc-(DeHex-HexNAc-)Hex-)Hex-HexNAc-(DeHex-)HexNAc+Hex
					931	924	928.451	927.948	2	1853.88	18.6	919.265	-	-	No	0	1	102.82	0	0	FALSE	-	2-3-0-0-0		Hex-(Hex-)Hex-HexNAc-HexNAc+Hex	Hex-(Hex-)Hex-HexNAc-(DeHex-)HexNAc+Hex
					933	924	906.908	906.908	2	1811.8	18.61	713.451	-	-	No	0	1	110.09	0	0	FALSE	-	2-3-0-0-0		Hex-(Hex-)Hex-HexNAc-HexNAc+Hex
					936	935	1029.44	1028.94	2	2055.87	18.64	1011.83	-	-	No	0	1	103.4	0	0	FALSE	-	2-3-0-0-0		Hex-(Hex-)Hex-HexNAc-HexNAc+Hex
					938	935	760.874	760.874	2	1519.73	18.65	543.358	-	-	No	0	1	122.61	0	0	FALSE	-	2-3-0-0-0		Hex-(Hex-)Hex-HexNAc-HexNAc+Hex
					940	935	1298.04	1297.55	2	2593.08	18.66	365.181	-	-	No	0	0.89	0.56	243.81	-1	TRUE	-	3-9-0-0-0	0-1-0-0-0	Hex-HexNAc-(Hex-Hex-)Hex-(Hex-(Hex-)Hex-)Hex-HexNAc-HexNAc+HexNAc1	Hex-HexNAc-(Hex-)Hex-(Hex-(Hex-Hex-)Hex-)Hex-HexNAc-HexNAc+HexNAc1	Hex-Hex-Hex-(HexNAc-)Hex-(Hex-(Hex-)Hex-)Hex-HexNAc-HexNAc+HexNAc1	Hex-Hex-(HexNAc-)Hex-(Hex-(Hex-Hex-)Hex-)Hex-HexNAc-HexNAc+HexNAc1	Hex-HexNAc-(Hex-Hex-Hex-)Hex-(Hex-Hex-)Hex-HexNAc-HexNAc+HexNAc1	Hex-Hex-Hex-Hex-(HexNAc-)Hex-(Hex-Hex-)Hex-HexNAc-HexNAc+HexNAc1	Hex-Hex-Hex-(Hex-HexNAc-)Hex-(Hex-Hex-)Hex-HexNAc-HexNAc+HexNAc1	Hex-Hex-(Hex-HexNAc-)Hex-(Hex-(Hex-)Hex-)Hex-HexNAc-HexNAc+HexNAc1
					944	935	1313.54	1313.54	2	2625.05	18.68	1424.72	-	-	No	0	1	120.38	0	0	FALSE	-	2-3-0-0-0		Hex-(Hex-)Hex-HexNAc-HexNAc+Hex	Hex-(Hex-)Hex-HexNAc-(DeHex-)HexNAc+Hex
					947	946	719.337	719.003	3	2153.99	18.7	728.53	-	-	No	0	1	103.75	0	0	FALSE	-	2-3-1-0-0		Hex-(Hex-)Hex-HexNAc-(DeHex-)HexNAc+Hex
					949	946	690.88	690.88	2	1379.74	18.72	559.505	-	-	No	0	1	69.54	0	0	FALSE	-	2-3-0-0-0		Hex-(Hex-)Hex-HexNAc-HexNAc+Hex
					951	946	773.856	773.351	2	1544.69	18.72	368.865	-	-	No	0	1	110.77	0	0	FALSE	-	2-3-0-0-0		Hex-(Hex-)Hex-HexNAc-HexNAc+Hex
					953	946	770.266	769.936	3	2306.79	18.73	558.927	-	-	No	0	1	102.58	0	0	FALSE	-	2-3-1-0-0		Hex-(Hex-)Hex-HexNAc-(DeHex-)HexNAc+Hex
					955	946	924.941	924.443	2	1846.87	18.74	812.854	-	-	No	0	1	46.83	0	0	FALSE	-	2-3-0-0-0		Hex-(Hex-)Hex-HexNAc-HexNAc+Hex
					958	957	709.907	709.907	2	1417.8	18.77	948.629	-	-	No	0	1	102.01	0	0	FALSE	-	2-3-0-0-0		Hex-(Hex-)Hex-HexNAc-HexNAc+Hex
					960	957	762.867	762.867	2	1523.72	18.78	740.408	-	-	No	0	1	5.48	0	0	FALSE	-	2-3-0-0-0		Hex-(Hex-)Hex-HexNAc-HexNAc+Hex
					962	957	976.417	976.417	2	1950.82	18.79	923.722	-	-	No	0	1	100.86	0	0	FALSE	-	2-3-1-0-0		Hex-(Hex-)Hex-HexNAc-(DeHex-)HexNAc+Hex	Hex-(Hex-)Hex-HexNAc-HexNAc+Hex
					964	957	819.693	819.693	3	2456.06	18.8	740.291	-	-	No	0	1	148.09	0	0	FALSE	-	2-3-1-0-0		Hex-(Hex-)Hex-HexNAc-(DeHex-)HexNAc+Hex	Hex-(Hex-)Hex-HexNAc-HexNAc+Hex
					966	957	882.683	882.35	3	2644.03	18.81	848.634	-	-	No	0	1	3.23	0	0	FALSE	-	2-3-1-0-0		Hex-(Hex-)Hex-HexNAc-(DeHex-)HexNAc+Hex
					969	968	973.456	972.951	2	1943.89	18.83	859.395	-	-	No	0	1	103.35	0	0	FALSE	-	2-3-1-0-0		Hex-(Hex-)Hex-HexNAc-(DeHex-)HexNAc+Hex	Hex-(Hex-)Hex-HexNAc-HexNAc+Hex
					971	968	1052.44	1052.44	2	2102.88	18.84	1000.34	-	-	No	0	1	100.26	0	0	FALSE	-	2-3-0-0-0		Hex-(Hex-)Hex-HexNAc-HexNAc+Hex
					973	968	846.911	846.407	2	1690.8	18.85	794.314	-	-	No	0	1	103.14	0	0	FALSE	-	2-3-0-0-0		Hex-(Hex-)Hex-HexNAc-HexNAc+Hex
					975	968	802.906	802.408	2	1602.8	18.86	750.257	-	-	No	0	1	100.43	0	0	FALSE	-	2-3-0-0-0		Hex-(Hex-)Hex-HexNAc-HexNAc+Hex
					977	968	744.349	744.349	2	1486.68	18.87	690.805	-	-	No	0	1	106.75	0	0	FALSE	-	2-3-0-0-0		Hex-(Hex-)Hex-HexNAc-HexNAc+Hex
					980	979	787.394	787.394	2	1572.77	18.89	735.552	-	-	No	0	1	107.28	0	0	FALSE	-	2-3-0-0-0		Hex-(Hex-)Hex-HexNAc-HexNAc+Hex
					982	979	703.339	703.339	2	1404.66	18.9	667.628	-	-	No	0	1	105.58	0	0	FALSE	-	2-3-0-0-0		Hex-(Hex-)Hex-HexNAc-HexNAc+Hex
					984	979	706.343	706.343	2	1410.67	18.91	697.582	-	-	No	0	1	103.28	0	0	FALSE	-	2-3-0-0-0		Hex-(Hex-)Hex-HexNAc-HexNAc+Hex
					986	979	897.42	897.42	2	1792.83	18.92	844.76	-	-	No	0	1	103.96	0	0	FALSE	-	2-3-0-0-0		Hex-(Hex-)Hex-HexNAc-HexNAc+Hex	Hex-(Hex-)Hex-HexNAc-(DeHex-)HexNAc+Hex
					988	979	912.438	912.438	2	1822.86	18.93	515.579	-	-	No	0	1	107.01	0	0	FALSE	-	2-3-0-0-0		Hex-(Hex-)Hex-HexNAc-HexNAc+Hex
					991	990	767.371	767.371	2	1532.73	18.96	714.771	-	-	No	0	1	65.18	0	0	FALSE	-	2-3-0-0-0		Hex-(Hex-)Hex-HexNAc-HexNAc+Hex
					993	990	808.349	808.349	2	1614.68	18.97	756.111	-	-	No	0	1	101.07	0	0	FALSE	-	2-3-0-0-0		Hex-(Hex-)Hex-HexNAc-HexNAc+Hex
					995	990	1378.55	1377.55	2	2753.09	18.98	1051.65	-	-	No	0	1	118.32	0.3	0	FALSE	-	2-4-0-0-0		Hex-Hex-(Hex-)Hex-HexNAc-HexNAc+Hex	Hex-(Hex-Hex-)Hex-HexNAc-HexNAc+Hex
					997	990	1216.52	1216.52	2	2431.02	18.99	791.209	-	-	No	0	1	267.68	0	-1	TRUE	-	2-4-0-0-0	0-1-0-0-0	Hex-(Hex-)Hex-HexNAc-HexNAc+HexNAc1
					999	990	1045.43	1045.43	2	2088.86	19	992.397	-	-	No	0	1	140.79	0	0	FALSE	-	2-3-0-0-0		Hex-(Hex-)Hex-HexNAc-HexNAc+Hex
					1002	1001	676.857	676.857	2	1351.7	19.02	651.226	-	-	No	0	1	105.07	0	0	FALSE	-	2-3-0-0-0		Hex-(Hex-)Hex-HexNAc-HexNAc+Hex
					1004	1001	777.368	777.033	3	2328.08	19.04	458.194	-	-	No	0	1	67.95	52.79	0	FALSE	-	3-4-0-1-0		NeuAc-Hex-HexNAc-Hex-(Hex-)Hex-HexNAc-HexNAc+Hex
					1006	1001	688.656	688.321	3	2061.94	19.05	654.414	-	-	No	0	1	107.26	0	0	FALSE	-	2-3-1-0-0		Hex-(Hex-)Hex-HexNAc-(DeHex-)HexNAc+Hex
					1008	1001	1034.94	1034.44	2	2066.86	19.06	880.435	-	-	No	0	1	101.54	0	0	FALSE	-	2-3-0-0-0		Hex-(Hex-)Hex-HexNAc-HexNAc+Hex
					1010	1001	1351.03	1350.54	2	2699.07	19.07	996.633	-	-	No	0	1	118.27	0	0	FALSE	-	2-3-0-0-0		Hex-(Hex-)Hex-HexNAc-HexNAc+Hex
					1013	1012	718.364	718.364	2	1434.71	19.09	596.473	-	-	No	0	1	116.12	0	0	FALSE	-	2-3-0-0-0		Hex-(Hex-)Hex-HexNAc-HexNAc+Hex
					1015	1012	699.965	699.965	3	2096.87	19.1	713.131	-	-	No	0	1	260.07	0	0	FALSE	-	2-3-1-0-0		Hex-(Hex-)Hex-HexNAc-(DeHex-)HexNAc+Hex	Hex-(Hex-)Hex-HexNAc-HexNAc+Hex
					1017	1012	781.855	781.855	2	1561.7	19.11	728.783	-	-	No	0	1	54.16	0	0	FALSE	-	2-3-0-0-0		Hex-(Hex-)Hex-HexNAc-HexNAc+Hex	Hex-(Hex-)Hex-HexNAc-(DeHex-)HexNAc+Hex
					1019	1012	939.949	939.449	2	1876.88	19.12	611.634	-	-	No	0	1	219.91	0	0	FALSE	-	2-3-0-0-0		Hex-(Hex-)Hex-HexNAc-HexNAc+Hex
					1021	1012	970.954	970.453	2	1938.89	19.13	829.753	-	-	No	0	1	3.67	0	0	FALSE	-	2-3-0-0-0		Hex-(Hex-)Hex-HexNAc-HexNAc+Hex
					1024	1023	823.91	823.411	2	1644.81	19.15	713.531	-	-	No	0	1	102.75	0	0	FALSE	-	2-3-1-0-0		Hex-(Hex-)Hex-HexNAc-(DeHex-)HexNAc+Hex	Hex-(Hex-)Hex-HexNAc-HexNAc+Hex
					1026	1023	804.333	804.333	2	1606.65	19.17	778.169	-	-	No	0	1	100.67	0	0	FALSE	-	2-3-0-0-0		Hex-(Hex-)Hex-HexNAc-HexNAc+Hex
					1028	1023	734.35	734.35	2	1466.68	19.17	682.111	-	-	No	0	1	100.22	0	0	FALSE	-	2-3-0-0-0		Hex-(Hex-)Hex-HexNAc-HexNAc+Hex
					1030	1023	695.992	695.657	3	2083.95	19.18	821.802	-	-	No	0	1	147.22	0	0	FALSE	-	2-3-1-0-0		Hex-(Hex-)Hex-HexNAc-(DeHex-)HexNAc+Hex
					1032	1023	915.878	915.878	2	1829.74	19.19	906.279	-	-	No	0	1	110.72	0	0	FALSE	-	2-3-0-0-0		Hex-(Hex-)Hex-HexNAc-HexNAc+Hex
					1035	1034	889.887	889.887	2	1777.76	19.21	837.752	-	-	No	0	1	100.22	0	0	FALSE	-	2-3-0-0-0		Hex-(Hex-)Hex-HexNAc-HexNAc+Hex
					1037	1034	752.857	752.857	2	1503.7	19.23	700.204	-	-	No	0	1	100.86	0	0	FALSE	-	2-3-0-0-0		Hex-(Hex-)Hex-HexNAc-HexNAc+Hex
					1039	1034	1009.99	1009.99	2	2017.97	19.24	1403.82	-	-	No	0	1	47.45	0	0	FALSE	-	2-3-1-0-0		Hex-(Hex-)Hex-HexNAc-(DeHex-)HexNAc+Hex	Hex-(Hex-)Hex-HexNAc-HexNAc+Hex
					1041	1034	987.411	986.913	2	1971.81	19.25	918.569	-	-	No	0	1	112.93	0	-2	TRUE	-	3-4-0-0-0	1-1-0-0-0	Hex-(Hex-)Hex-HexNAc-HexNAc+Hex1HexNAc1
					1043	1034	855.693	855.355	3	2563.04	19.26	802.835	-	-	No	0	1	115.83	0	0	FALSE	-	2-3-0-0-0		Hex-(Hex-)Hex-HexNAc-HexNAc+Hex
					1046	1045	786.85	785.85	2	1569.69	19.28	713.129	-	-	No	0	1	101.99	0	0	FALSE	-	2-3-0-0-0		Hex-(Hex-)Hex-HexNAc-HexNAc+Hex
					1048	1045	1136.02	1135.52	2	2269.02	19.29	791.279	-	-	No	0	0.99	115.03	0	0	FALSE	-	2-3-0-0-0		Hex-(Hex-)Hex-HexNAc-HexNAc+Hex
					1052	1045	901.42	901.42	2	1800.83	19.32	757.523	-	-	No	0	1	107.06	0	0	FALSE	-	2-3-0-0-0		Hex-(Hex-)Hex-HexNAc-HexNAc+Hex
					1054	1045	852.317	852.317	2	1702.62	19.33	816.557	-	-	No	0	1	111.67	0	0	FALSE	-	2-3-0-0-0		Hex-(Hex-)Hex-HexNAc-HexNAc+Hex
					1057	1056	1049.44	1049.44	2	2096.87	19.35	1221.6	-	-	No	0	1	110.81	0	0	FALSE	-	2-3-1-0-0		Hex-(Hex-)Hex-HexNAc-(DeHex-)HexNAc+Hex	Hex-(Hex-)Hex-HexNAc-HexNAc+Hex
					1059	1056	1001.41	1001.07	3	3000.2	19.36	861.299	-	-	No	0	0.92	153.75	9.58	0	FALSE	-	2-5-0-0-0		Hex-Hex-Hex-(Hex-)Hex-HexNAc-HexNAc+Hex	Hex-Hex-(Hex-Hex-)Hex-HexNAc-HexNAc+Hex
					1061	1056	818.291	817.627	3	2449.86	19.37	553.286	-	-	No	0	1	101.76	0	0	FALSE	-	2-3-0-0-0		Hex-(Hex-)Hex-HexNAc-HexNAc+Hex	Hex-(Hex-)Hex-HexNAc-(DeHex-)HexNAc+Hex
					1063	1056	911.401	910.898	2	1819.78	19.38	492.925	-	-	No	0	1	104.03	0	0	FALSE	-	2-3-0-0-0		Hex-(Hex-)Hex-HexNAc-HexNAc+Hex
					1065	1056	1312.52	1312.03	2	2622.04	19.39	1406.8	-	-	No	0	1	114.59	0	-3	TRUE	-	3-5-0-0-0	1-2-0-0-0	Hex-(Hex-)Hex-HexNAc-HexNAc+Hex1HexNAc2
					1068	1067	654.629	654.629	3	1960.87	19.41	619.113	-	-	No	0	1	119.99	0	0	FALSE	-	2-3-0-0-0		Hex-(Hex-)Hex-HexNAc-HexNAc+Hex
					1070	1067	745.332	745.332	3	2232.97	19.43	794.746	-	-	No	0	1	148.35	0	0	FALSE	-	2-3-0-0-0		Hex-(Hex-)Hex-HexNAc-HexNAc+Hex	Hex-(Hex-)Hex-HexNAc-(DeHex-)HexNAc+Hex
					1072	1067	1021.99	1021.49	2	2040.97	19.44	989.904	-	-	No	0	1	103.21	0	0	FALSE	-	2-3-0-0-0		Hex-(Hex-)Hex-HexNAc-HexNAc+Hex
					1074	1067	860.406	860.406	2	1718.8	19.45	808.295	-	-	No	0	1	107.59	0	0	FALSE	-	2-3-0-0-0		Hex-(Hex-)Hex-HexNAc-HexNAc+Hex
					1076	1067	1281.98	1281.48	2	2560.94	19.46	1232.86	-	-	No	0	1	101	0	0	FALSE	-	2-3-0-0-0		Hex-(Hex-)Hex-HexNAc-HexNAc+Hex	Hex-(Hex-)Hex-HexNAc-(DeHex-)HexNAc+Hex
					1079	1078	754.929	754.929	2	1507.84	19.48	746.389	-	-	No	0	1	56.75	0	0	FALSE	-	2-3-0-0-0		Hex-(Hex-)Hex-HexNAc-HexNAc+Hex
					1081	1078	662.254	662.254	3	1983.74	19.5	542.239	-	-	No	0	1	105.33	0	0	FALSE	-	2-3-1-0-0		Hex-(Hex-)Hex-HexNAc-(DeHex-)HexNAc+Hex
					1083	1078	1196.5	1195.84	3	3584.5	19.51	1221.41	-	-	No	0	1	170.66	2	0	FALSE	-	4-3-0-0-0		HexNAc-Hex-(HexNAc-Hex-)Hex-HexNAc-HexNAc+Hex	HexNAc-(HexNAc-)Hex-(Hex-)Hex-HexNAc-HexNAc+Hex
					1085	1078	841.872	841.872	2	1681.73	19.52	788.737	-	-	No	0	1	105.97	0	0	FALSE	-	2-3-0-0-0		Hex-(Hex-)Hex-HexNAc-HexNAc+Hex
					1087	1078	887.404	887.404	2	1772.79	19.53	713.091	-	-	No	0	1	145.51	0	0	FALSE	-	2-3-0-0-0		Hex-(Hex-)Hex-HexNAc-HexNAc+Hex
					1090	1089	747.865	747.865	2	1493.71	19.56	597.546	-	-	No	0	1	102.08	0	0	FALSE	-	2-3-0-0-0		Hex-(Hex-)Hex-HexNAc-HexNAc+Hex
					1092	1089	850.395	850.395	2	1698.78	19.57	763.725	-	-	No	0	1	100.8	0	0	FALSE	-	2-3-0-0-0		Hex-(Hex-)Hex-HexNAc-HexNAc+Hex
					1094	1089	1113.48	1112.98	2	2223.94	19.58	561.315	-	-	No	0	1	2.06	100	0	FALSE	-	2-4-1-0-0		Hex-Hex-(Hex-)Hex-HexNAc-(DeHex-)HexNAc+Hex	Hex-(Hex-Hex-)Hex-HexNAc-(DeHex-)HexNAc+Hex
					1096	1089	815.081	814.749	3	2441.22	19.59	762.736	-	-	No	0	1	155.1	0	0	FALSE	-	2-3-0-0-0		Hex-(Hex-)Hex-HexNAc-HexNAc+Hex
					1098	1089	725.301	725.301	3	2172.88	19.6	901.312	-	-	No	0	1	107.45	0	0	FALSE	-	2-3-0-0-0		Hex-(Hex-)Hex-HexNAc-HexNAc+Hex
					1101	1100	667.948	667.948	3	2000.82	19.62	786.739	-	-	No	0	1	126.73	0	0	FALSE	-	2-3-0-0-0		Hex-(Hex-)Hex-HexNAc-HexNAc+Hex
					1103	1100	1188.48	1187.98	2	2373.95	19.63	996.575	-	-	No	0	1	121.46	0	0	FALSE	-	2-3-0-0-0		Hex-(Hex-)Hex-HexNAc-HexNAc+Hex
					1105	1100	833.974	833.974	3	2498.9	19.64	731.085	-	-	No	0	1	104.58	0	0	FALSE	-	2-3-0-0-0		Hex-(Hex-)Hex-HexNAc-HexNAc+Hex
					1107	1100	1151.45	1150.95	2	2299.89	19.65	1014.5	-	-	No	0	1	148.81	0	0	FALSE	-	2-3-1-0-0		Hex-(Hex-)Hex-HexNAc-(DeHex-)HexNAc+Hex	Hex-(Hex-)Hex-HexNAc-HexNAc+Hex
					1109	1100	933.388	933.388	2	1864.76	19.66	829.741	-	-	No	0	1	4.25	0	0	FALSE	-	2-3-0-0-0		Hex-(Hex-)Hex-HexNAc-HexNAc+Hex
					1112	1111	876.958	876.457	2	1750.9	19.68	859.384	-	-	No	0	0.98	60.99	0	-1	TRUE	-	3-3-0-0-0	1-0-0-0-0	Hex-(Hex-)Hex-HexNAc-HexNAc+Hex1
					1114	1111	831.853	831.853	2	1661.69	19.7	515.579	-	-	No	0	1	115.05	0	0	FALSE	-	2-3-0-0-0		Hex-(Hex-)Hex-HexNAc-HexNAc+Hex	Hex-(Hex-)Hex-HexNAc-(DeHex-)HexNAc+Hex
					1116	1111	673.999	673.664	3	2017.97	19.71	488.225	-	-	No	0	1	98.71	0	0	FALSE	-	2-3-1-0-0		Hex-(Hex-)Hex-HexNAc-(DeHex-)HexNAc+Hex	Hex-(Hex-)Hex-HexNAc-HexNAc+Hex
					1118	1111	871.037	870.702	3	2609.09	19.72	713.531	-	-	No	0	0.95	106.69	2.99	0	FALSE	-	2-5-0-0-0		Hex-Hex-Hex-(Hex-)Hex-HexNAc-HexNAc+Hex	Hex-Hex-(Hex-Hex-)Hex-HexNAc-HexNAc+Hex
					1120	1111	947.387	947.058	3	2838.15	19.73	861.306	-	-	No	0	1	131.42	1.66	0	FALSE	-	2-4-0-0-0		Hex-Hex-(Hex-)Hex-HexNAc-HexNAc+Hex	Hex-(Hex-Hex-)Hex-HexNAc-HexNAc+Hex
					1123	1122	774.34	774.34	2	1546.66	19.75	721.316	-	-	No	0	1	79.65	0	0	FALSE	-	2-3-0-0-0		Hex-(Hex-)Hex-HexNAc-HexNAc+Hex
					1125	1122	692.862	692.862	2	1383.71	19.76	458.194	-	-	No	0	1	89.82	0	0	FALSE	-	2-3-0-0-0		Hex-(Hex-)Hex-HexNAc-HexNAc+Hex
					1127	1122	874.03	873.692	3	2618.05	19.77	804.145	-	-	No	0	1	124.01	0	0	FALSE	-	2-3-0-0-0		Hex-(Hex-)Hex-HexNAc-HexNAc+Hex
					1129	1122	798.878	798.878	2	1595.74	19.78	746.227	-	-	No	0	1	115.58	0	0	FALSE	-	2-3-0-0-0		Hex-(Hex-)Hex-HexNAc-HexNAc+Hex
					1131	1122	1179.14	1178.82	3	3533.43	19.79	1058.56	-	-	No	0	1	42.98	107.21	0	FALSE	-	3-5-0-0-0		HexNAc-(Hex-)Hex-(Hex-Hex-)Hex-HexNAc-HexNAc+Hex	HexNAc-Hex-(Hex-(Hex-)Hex-)Hex-HexNAc-HexNAc+Hex	HexNAc-Hex-(Hex-Hex-Hex-)Hex-HexNAc-HexNAc+Hex	Hex-HexNAc-(Hex-)Hex-(Hex-)Hex-HexNAc-HexNAc+Hex	HexNAc-(Hex-Hex-)Hex-(Hex-)Hex-HexNAc-HexNAc+Hex	Hex-HexNAc-Hex-(Hex-Hex-)Hex-HexNAc-HexNAc+Hex
					1134	1133	671.824	671.824	2	1341.63	19.81	663.134	-	-	No	0	1	94.96	0	0	FALSE	-	2-3-0-0-0		Hex-(Hex-)Hex-HexNAc-HexNAc+Hex
					1136	1133	1004.07	1003.74	3	3008.2	19.83	543.914	-	-	No	0	1	72.64	157.44	0	FALSE	-	3-6-1-0-0		Hex-Hex-Hex-Hex-(HexNAc-Hex-)Hex-HexNAc-(DeHex-)HexNAc+Hex	HexNAc-Hex-Hex-Hex-(Hex-Hex-)Hex-HexNAc-(DeHex-)HexNAc+Hex
					1138	1133	1385.55	1385.05	2	2768.08	19.84	554.768	-	-	No	0	0.85	2.21	140.34	0	FALSE	-	3-5-1-0-0		DeHex-HexNAc-(Hex-)Hex-(Hex-Hex-)Hex-HexNAc-HexNAc+Hex	DeHex-HexNAc-Hex-(Hex-(Hex-)Hex-)Hex-HexNAc-HexNAc+Hex	DeHex-HexNAc-Hex-(Hex-Hex-Hex-)Hex-HexNAc-HexNAc+Hex
					1140	1133	921.406	920.742	3	2759.2	19.85	868.365	-	-	No	0	1	129.46	1.23	0	FALSE	-	2-4-1-0-0		Hex-(Hex-Hex-)Hex-HexNAc-(DeHex-)HexNAc+Hex	Hex-Hex-(Hex-)Hex-HexNAc-(DeHex-)HexNAc+Hex
					1142	1133	790.297	790.297	2	1578.58	19.86	829.249	-	-	No	0	1	103.28	0	0	FALSE	-	2-3-0-0-0		Hex-(Hex-)Hex-HexNAc-HexNAc+Hex	Hex-(Hex-)Hex-HexNAc-(DeHex-)HexNAc+Hex
					1145	1144	828.976	828.644	3	2482.91	19.87	796.591	-	-	No	0	1	153.21	0	0	FALSE	-	2-3-1-0-0		Hex-(Hex-)Hex-HexNAc-(DeHex-)HexNAc+Hex
					1147	1144	884.901	884.401	2	1766.79	19.89	833.539	-	-	No	0	1	13.21	0	0	FALSE	-	2-3-0-0-0		Hex-(Hex-)Hex-HexNAc-HexNAc+Hex
					1149	1144	1320.08	1319.58	2	2637.15	19.9	612.635	-	-	No	0	1	109.33	40.98	0	FALSE	-	3-4-0-0-0		Hex-Hex-(HexNAc-Hex-)Hex-HexNAc-HexNAc+Hex
					1151	1144	821.421	821.088	3	2460.24	19.91	768.194	-	-	No	0	1	103.32	0	0	FALSE	-	2-3-1-0-0		Hex-(Hex-)Hex-HexNAc-(DeHex-)HexNAc+Hex	Hex-(Hex-)Hex-HexNAc-HexNAc+Hex
					1153	1144	731.326	731.326	2	1460.64	19.92	678.167	-	-	No	0	1	34.89	0	0	FALSE	-	2-3-0-0-0		Hex-(Hex-)Hex-HexNAc-HexNAc+Hex
					1156	1155	653.317	652.983	3	1955.93	19.94	369.946	-	-	No	0	1	103.68	0	0	FALSE	-	2-3-1-0-0		Hex-(Hex-)Hex-HexNAc-(DeHex-)HexNAc+Hex
					1158	1155	757.611	757.276	3	2268.8	19.95	458.194	-	-	No	0	1	120.25	0	0	FALSE	-	2-3-0-0-0		Hex-(Hex-)Hex-HexNAc-HexNAc+Hex
					1160	1155	1243.46	1242.46	2	2482.9	19.96	1031.51	-	-	No	0	1	72.66	0	0	FALSE	-	2-3-0-0-0		Hex-(Hex-)Hex-HexNAc-HexNAc+Hex
					1162	1155	963.443	962.938	2	1923.86	19.97	600.631	-	-	No	0	1	187.66	0	0	FALSE	-	2-3-0-0-0		Hex-(Hex-)Hex-HexNAc-HexNAc+Hex
					1164	1155	1143.98	1143.48	2	2284.94	19.98	1094.81	-	-	No	0	1	100.81	0	0	FALSE	-	2-3-0-0-0		Hex-(Hex-)Hex-HexNAc-HexNAc+Hex
					1167	1166	685.803	685.803	2	1369.59	20	649.975	-	-	No	0	1	105.83	0	0	FALSE	-	2-3-0-0-0		Hex-(Hex-)Hex-HexNAc-HexNAc+Hex
					1169	1166	782.317	781.991	3	2342.95	20.01	999.491	-	-	No	0	1	109.29	0	0	FALSE	-	2-3-1-0-0		Hex-(Hex-)Hex-HexNAc-(DeHex-)HexNAc+Hex	Hex-(Hex-)Hex-HexNAc-HexNAc+Hex
					1171	1166	1087.11	1086.78	3	3257.33	20.02	430.201	-	-	No	0	1	3.83	113.58	0	FALSE	-	4-8-0-1-0		NeuAc-Hex-HexNAc-(Hex-)Hex-(Hex-Hex-Hex-(HexNAc-)Hex-)Hex-HexNAc-HexNAc+Hex	NeuAc-Hex-HexNAc-(Hex-Hex-)Hex-(Hex-Hex-(HexNAc-)Hex-)Hex-HexNAc-HexNAc+Hex	NeuAc-Hex-HexNAc-(Hex-)Hex-(Hex-HexNAc-(Hex-Hex-)Hex-)Hex-HexNAc-HexNAc+Hex	NeuAc-Hex-HexNAc-(Hex-Hex-Hex-)Hex-(Hex-HexNAc-Hex-)Hex-HexNAc-HexNAc+Hex	NeuAc-Hex-HexNAc-(Hex-Hex-Hex-)Hex-(HexNAc-(Hex-)Hex-)Hex-HexNAc-HexNAc+Hex	NeuAc-Hex-HexNAc-(Hex-Hex-Hex-Hex-)Hex-(HexNAc-Hex-)Hex-HexNAc-HexNAc+Hex	NeuAc-Hex-HexNAc-(Hex-Hex-)Hex-(HexNAc-(Hex-Hex-)Hex-)Hex-HexNAc-HexNAc+Hex	NeuAc-Hex-HexNAc-(Hex-)Hex-(Hex-Hex-(Hex-HexNAc-)Hex-)Hex-HexNAc-HexNAc+Hex	NeuAc-Hex-HexNAc-(Hex-Hex-)Hex-(Hex-HexNAc-(Hex-)Hex-)Hex-HexNAc-HexNAc+Hex
					1173	1166	979.466	978.972	2	1955.93	20.03	1126.43	-	-	No	0	1	106.01	0	0	FALSE	-	2-3-0-0-0		Hex-(Hex-)Hex-HexNAc-HexNAc+Hex
					1175	1166	844.352	844.022	3	2529.04	20.04	627.628	-	-	No	0	0.87	102.03	4.66	0	FALSE	-	3-4-0-0-0		HexNAc-Hex-(Hex-Hex-)Hex-HexNAc-HexNAc+Hex	Hex-HexNAc-Hex-(Hex-)Hex-HexNAc-HexNAc+Hex	HexNAc-(Hex-)Hex-(Hex-)Hex-HexNAc-HexNAc+Hex
					1178	1177	714.262	714.262	3	2139.76	20.06	683.16	-	-	No	0	1	110.1	0	0	FALSE	-	2-3-0-0-0		Hex-(Hex-)Hex-HexNAc-HexNAc+Hex
					1180	1177	659.047	658.793	4	2631.14	20.08	350.517	-	-	No	0	1	4.52	106.89	0	FALSE	-	4-3-0-0-0		HexNAc-Hex-(HexNAc-Hex-)Hex-HexNAc-HexNAc+Hex	HexNAc-(HexNAc-)Hex-(Hex-)Hex-HexNAc-HexNAc+Hex
					1182	1177	880.39	880.056	3	2637.15	20.09	408.187	-	-	No	0	1	5.35	147.54	0	FALSE	-	3-6-0-0-0		Hex-Hex-Hex-(Hex-HexNAc-Hex-)Hex-HexNAc-HexNAc+Hex	Hex-HexNAc-Hex-Hex-Hex-(Hex-)Hex-HexNAc-HexNAc+Hex	Hex-Hex-(Hex-)Hex-(HexNAc-Hex-)Hex-HexNAc-HexNAc+Hex	HexNAc-Hex-Hex-(Hex-)Hex-(Hex-)Hex-HexNAc-HexNAc+Hex	Hex-Hex-Hex-(HexNAc-(Hex-)Hex-)Hex-HexNAc-HexNAc+Hex
					1184	1177	909.353	909.353	2	1816.69	20.1	678.321	-	-	No	0	1	103.66	0	0	FALSE	-	2-3-0-0-0		Hex-(Hex-)Hex-HexNAc-HexNAc+Hex
					1186	1177	794.293	793.625	3	2377.85	20.11	741.117	-	-	No	0	1	121.15	0	0	FALSE	-	2-3-0-0-0		Hex-(Hex-)Hex-HexNAc-HexNAc+Hex
					1189	1188	679.301	679.301	2	1356.59	20.13	644.735	-	-	No	0	1	105.57	0	0	FALSE	-	2-3-0-0-0		Hex-(Hex-)Hex-HexNAc-HexNAc+Hex
					1191	1188	1006.46	1005.96	2	2009.9	20.14	328.166	-	-	No	0	1	2.07	101.82	0	FALSE	-	3-3-2-0-0		DeHex-HexNAc-Hex-(Hex-)Hex-HexNAc-(DeHex-)HexNAc+Hex
					1193	1188	1172.98	1172.48	2	2342.95	20.15	1066.77	-	-	No	0	1	104.17	0	0	FALSE	-	2-3-0-0-0		Hex-(Hex-)Hex-HexNAc-HexNAc+Hex
					1195	1188	951.906	951.906	2	1901.8	20.16	1010.65	-	-	No	0	1	106.86	0	-1	TRUE	-	3-3-0-0-0	1-0-0-0-0	Hex-(Hex-)Hex-HexNAc-HexNAc+Hex1
					1197	1188	836.299	835.97	3	2504.89	20.17	763.467	-	-	No	0	1	105.97	0	0	FALSE	-	2-3-1-0-0		Hex-(Hex-)Hex-HexNAc-(DeHex-)HexNAc+Hex	Hex-(Hex-)Hex-HexNAc-HexNAc+Hex
					1200	1199	722.321	722.321	3	2163.94	20.19	292.895	-	-	No	0	1	0.17	100.23	0	FALSE	-	3-3-2-0-0		DeHex-HexNAc-Hex-(Hex-)Hex-HexNAc-(DeHex-)HexNAc+Hex
					1202	1199	650.283	650.283	3	1947.83	20.2	615.638	-	-	No	0	1	101.87	0	0	FALSE	-	2-3-1-0-0		Hex-(Hex-)Hex-HexNAc-(DeHex-)HexNAc+Hex
					1204	1199	865.412	864.905	2	1727.8	20.21	627.628	-	-	No	0	1	115.41	0	0	FALSE	-	2-3-0-0-0		Hex-(Hex-)Hex-HexNAc-HexNAc+Hex
					1208	1199	906.897	906.395	2	1810.78	20.23	348.183	-	-	No	0	1	137.52	0	0	FALSE	-	2-3-0-0-0		Hex-(Hex-)Hex-HexNAc-HexNAc+Hex
					1211	1210	895.896	895.896	2	1789.78	20.25	615.431	-	-	No	0	1	114.62	0	0	FALSE	-	2-3-1-0-0		Hex-(Hex-)Hex-HexNAc-(DeHex-)HexNAc+Hex	Hex-(Hex-)Hex-HexNAc-HexNAc+Hex
					1213	1210	1083.48	1082.98	2	2163.94	20.26	1030.83	-	-	No	0	1	100.09	0	0	FALSE	-	2-3-0-0-0		Hex-(Hex-)Hex-HexNAc-HexNAc+Hex	Hex-(Hex-)Hex-HexNAc-(DeHex-)HexNAc+Hex
					1215	1210	1231.62	1231.12	2	2460.22	20.27	1072.63	-	-	No	0	1	175.6	0	0	FALSE	-	2-3-1-0-0		Hex-(Hex-)Hex-HexNAc-(DeHex-)HexNAc+Hex	Hex-(Hex-)Hex-HexNAc-HexNAc+Hex
					1217	1210	800.849	800.849	2	1599.68	20.28	748.671	-	-	No	0	1	100.7	0	0	FALSE	-	2-3-0-0-0		Hex-(Hex-)Hex-HexNAc-HexNAc+Hex
					1222	1221	709.075	708.824	4	2831.27	20.31	430.201	-	-	No	0	0.96	100.27	12.99	0	FALSE	-	3-4-0-1-0		NeuAc-Hex-HexNAc-Hex-(Hex-)Hex-HexNAc-HexNAc+Hex
					1224	1221	690.812	690.812	2	1379.61	20.33	451.876	-	-	No	0	1	11.71	0	0	FALSE	-	2-3-0-0-0		Hex-(Hex-)Hex-HexNAc-HexNAc+Hex
					1226	1221	736.875	736.875	2	1471.73	20.34	702.253	-	-	No	0	1	103.4	0	0	FALSE	-	2-3-0-0-0		Hex-(Hex-)Hex-HexNAc-HexNAc+Hex
					1228	1221	812.629	812.291	3	2433.85	20.34	777.804	-	-	No	0	1	100.14	0	0	FALSE	-	2-3-1-0-0		Hex-(Hex-)Hex-HexNAc-(DeHex-)HexNAc+Hex
					1230	1221	656.298	656.298	2	1310.58	20.36	502.866	-	-	No	0	1	102.21	0	0	FALSE	-	2-3-0-0-0		Hex-(Hex-)Hex-HexNAc-HexNAc+Hex	Hex-(Hex-)Hex-HexNAc-(DeHex-)HexNAc+Hex
					1233	1232	740.38	740.046	3	2217.12	20.37	729.2	-	-	No	0	1	153.17	0	0	FALSE	-	2-3-0-0-0		Hex-(Hex-)Hex-HexNAc-HexNAc+Hex
					1237	1232	839.357	839.023	3	2514.05	20.4	861.319	-	-	No	0	1	122.57	0	0	FALSE	-	2-3-1-0-0		Hex-(Hex-)Hex-HexNAc-(DeHex-)HexNAc+Hex	Hex-(Hex-)Hex-HexNAc-HexNAc+Hex
					1239	1232	762.652	762.652	3	2284.93	20.41	554.768	-	-	No	0	1	145.75	0	0	FALSE	-	2-3-0-0-0		Hex-(Hex-)Hex-HexNAc-HexNAc+Hex	Hex-(Hex-)Hex-HexNAc-(DeHex-)HexNAc+Hex
					1241	1232	928.444	928.444	2	1854.87	20.42	863.347	-	-	No	0	1	40.24	0	0	FALSE	-	2-3-0-0-0		Hex-(Hex-)Hex-HexNAc-HexNAc+Hex
					1244	1243	719.979	719.979	3	2156.92	20.44	786.64	-	-	No	0	1	127.37	0	0	FALSE	-	2-3-1-0-0		Hex-(Hex-)Hex-HexNAc-(DeHex-)HexNAc+Hex
					1246	1243	795.694	795.36	3	2383.06	20.45	584.782	-	-	No	0	1	100.84	0	0	FALSE	-	2-3-1-0-0		Hex-(Hex-)Hex-HexNAc-(DeHex-)HexNAc+Hex
					1248	1243	972.4	972.063	3	2913.17	20.46	525.272	-	-	No	0	0.84	68.79	248.25	-1	TRUE	-	3-9-0-0-0	0-1-0-0-0	Hex-Hex-Hex-(Hex-HexNAc-)Hex-(Hex-Hex-)Hex-HexNAc-HexNAc+HexNAc1	Hex-HexNAc-(Hex-Hex-Hex-)Hex-(Hex-Hex-)Hex-HexNAc-HexNAc+HexNAc1	Hex-Hex-(HexNAc-)Hex-(Hex-(Hex-Hex-)Hex-)Hex-HexNAc-HexNAc+HexNAc1	Hex-Hex-(Hex-HexNAc-)Hex-(Hex-(Hex-)Hex-)Hex-HexNAc-HexNAc+HexNAc1	Hex-HexNAc-(Hex-)Hex-(Hex-(Hex-Hex-)Hex-)Hex-HexNAc-HexNAc+HexNAc1	Hex-HexNAc-(Hex-Hex-)Hex-(Hex-(Hex-)Hex-)Hex-HexNAc-HexNAc+HexNAc1	Hex-Hex-Hex-(HexNAc-)Hex-(Hex-(Hex-)Hex-)Hex-HexNAc-HexNAc+HexNAc1	Hex-Hex-Hex-Hex-(HexNAc-)Hex-(Hex-Hex-)Hex-HexNAc-HexNAc+HexNAc1
					1250	1243	974.936	974.936	2	1947.86	20.47	739.867	-	-	No	0	1	100.36	0	0	FALSE	-	2-3-0-0-0		Hex-(Hex-)Hex-HexNAc-HexNAc+Hex	Hex-(Hex-)Hex-HexNAc-(DeHex-)HexNAc+Hex
					1252	1243	675.613	675.277	3	2022.81	20.48	640.697	-	-	No	0	1	100.74	0	0	FALSE	-	2-3-1-0-0		Hex-(Hex-)Hex-HexNAc-(DeHex-)HexNAc+Hex	Hex-(Hex-)Hex-HexNAc-HexNAc+Hex
					1255	1254	670.567	670.314	4	2677.22	20.5	523.227	-	-	No	0	1	100.76	0.75	0	FALSE	-	2-5-0-0-0		Hex-Hex-Hex-(Hex-)Hex-HexNAc-HexNAc+Hex	Hex-Hex-(Hex-Hex-)Hex-HexNAc-HexNAc+Hex
					1257	1254	810.038	809.705	3	2426.09	20.52	602.998	-	-	No	0	1	122.52	0	0	FALSE	-	2-3-0-0-0		Hex-(Hex-)Hex-HexNAc-HexNAc+Hex
					1259	1254	1223.49	1222.99	2	2443.97	20.53	554.768	-	-	No	0	1	3.8	128.88	0	FALSE	-	3-4-1-0-0		Hex-Hex-(DeHex-HexNAc-Hex-)Hex-HexNAc-HexNAc+Hex
					1261	1254	1079.46	1079.46	2	2156.91	20.54	1007.7	-	-	No	0	1	55.91	0	0	FALSE	-	2-3-0-0-0		Hex-(Hex-)Hex-HexNAc-HexNAc+Hex
					1263	1254	1111.47	1111.47	2	2220.92	20.55	1005.74	-	-	No	0	1	113.86	0.24	-2	TRUE	-	3-5-0-0-0	0-2-0-0-0	HexNAc-Hex-(Hex-)Hex-HexNAc-HexNAc+HexNAc2	Hex-(HexNAc-Hex-)Hex-HexNAc-HexNAc+HexNAc2
					1268	1265	774.877	774.375	2	1546.73	20.58	722.277	-	-	No	0	1	114.67	0	0	FALSE	-	2-3-0-0-0		Hex-(Hex-)Hex-HexNAc-HexNAc+Hex
					1270	1265	900.382	899.885	2	1797.76	20.59	882.708	-	-	No	0	1	77.47	0	0	FALSE	-	2-3-0-0-0		Hex-(Hex-)Hex-HexNAc-HexNAc+Hex
					1272	1265	949.44	948.933	2	1895.85	20.6	612.635	-	-	No	0	1	173.18	0	0	FALSE	-	2-3-0-0-0		Hex-(Hex-)Hex-HexNAc-HexNAc+Hex
					1274	1265	1063.44	1063.44	2	2124.87	20.61	1424.81	-	-	No	0	1	100.77	0	0	FALSE	-	2-3-0-0-0		Hex-(Hex-)Hex-HexNAc-HexNAc+Hex
					1277	1276	767.036	766.702	3	2297.09	20.64	727.51	-	-	No	0	1	118.96	0	0	FALSE	-	2-3-1-0-0		Hex-(Hex-)Hex-HexNAc-(DeHex-)HexNAc+Hex
					1279	1276	826.887	826.887	2	1651.76	20.65	859.395	-	-	No	0	1	4.95	0	0	FALSE	-	2-3-0-0-0		Hex-(Hex-)Hex-HexNAc-HexNAc+Hex
					1281	1276	895.899	894.389	2	1786.76	20.66	615.417	-	-	No	0	1	126.63	0	0	FALSE	-	2-3-0-0-0		Hex-(Hex-)Hex-HexNAc-HexNAc+Hex	Hex-(Hex-)Hex-HexNAc-(DeHex-)HexNAc+Hex
					1283	1276	937.423	937.094	3	2808.26	20.67	458.194	-	-	No	0	1	8.44	200.01	0	FALSE	-	4-4-1-0-0		HexNAc-(Hex-HexNAc-)Hex-(Hex-)Hex-HexNAc-(DeHex-)HexNAc+Hex	HexNAc-Hex-(HexNAc-(Hex-)Hex-)Hex-HexNAc-(DeHex-)HexNAc+Hex	HexNAc-Hex-(Hex-HexNAc-Hex-)Hex-HexNAc-(DeHex-)HexNAc+Hex
					1285	1276	1244.58	1244.08	2	2486.14	20.68	656.665	-	-	No	0	0.93	132.78	88.46	-1	TRUE	-	2-6-0-0-0	0-1-0-0-0	Hex-Hex-Hex-(Hex-)Hex-HexNAc-HexNAc+HexNAc1	Hex-Hex-(Hex-Hex-)Hex-HexNAc-HexNAc+HexNAc1
					1288	1287	696.831	696.337	2	1390.66	20.7	380.702	-	-	No	0	1	100.37	0	0	FALSE	-	2-3-0-0-0		Hex-(Hex-)Hex-HexNAc-HexNAc+Hex
					1290	1287	1180.99	1180.99	2	2359.96	20.71	1484.88	-	-	No	0	1	110.79	0	0	FALSE	-	2-3-1-0-0		Hex-(Hex-)Hex-HexNAc-(DeHex-)HexNAc+Hex	Hex-(Hex-)Hex-HexNAc-HexNAc+Hex
					1292	1287	699.3	698.97	3	2093.89	20.72	542.239	-	-	No	0	1	101.42	0	0	FALSE	-	2-3-1-0-0		Hex-(Hex-)Hex-HexNAc-(DeHex-)HexNAc+Hex	Hex-(Hex-)Hex-HexNAc-HexNAc+Hex
					1294	1287	1110.06	1109.56	2	2217.11	20.73	1072.67	-	-	No	0	1	106.57	0	0	FALSE	-	2-3-1-0-0		Hex-(Hex-)Hex-HexNAc-(DeHex-)HexNAc+Hex
					1296	1287	1141.42	1140.92	2	2279.82	20.75	838.499	-	-	No	0	1	113.27	0	0	FALSE	-	2-3-1-0-0		Hex-(Hex-)Hex-HexNAc-(DeHex-)HexNAc+Hex	Hex-(Hex-)Hex-HexNAc-HexNAc+Hex
					1299	1298	867.317	866.984	3	2597.93	20.76	713.531	-	-	No	0	1	112.56	0	0	FALSE	-	2-3-0-0-0		Hex-(Hex-)Hex-HexNAc-HexNAc+Hex
					1301	1298	682.641	682.309	3	2043.9	20.78	560.737	-	-	No	0	1	111.7	0	0	FALSE	-	2-3-0-0-0		Hex-(Hex-)Hex-HexNAc-HexNAc+Hex
					1303	1298	1329.06	1328.56	2	2655.11	20.79	920.795	-	-	No	0	1	101.53	0	0	FALSE	-	2-3-0-0-0		Hex-(Hex-)Hex-HexNAc-HexNAc+Hex
					1305	1298	1085.46	1084.79	3	3251.34	20.8	543.914	-	-	No	0	0.52	7.41	214.38	-3	TRUE	-	4-6-4-0-0	0-1-2-0-0	DeHex-HexNAc-Hex-Hex-Hex-(HexNAc-Hex-)Hex-HexNAc-(DeHex-)HexNAc+HexNAc1DeHex2
					1307	1298	1045.92	1045.92	2	2089.83	20.81	1321.67	-	-	No	0	1	101.62	0	0	FALSE	-	2-3-0-0-0		Hex-(Hex-)Hex-HexNAc-HexNAc+Hex
					1310	1309	761.283	760.949	3	2279.82	20.83	690.036	-	-	No	0	1	207.58	0	0	FALSE	-	2-3-0-0-0		Hex-(Hex-)Hex-HexNAc-HexNAc+Hex
					1312	1309	744.36	744.36	2	1486.7	20.84	736.145	-	-	No	0	1	114.14	0	0	FALSE	-	2-3-0-0-0		Hex-(Hex-)Hex-HexNAc-HexNAc+Hex
					1314	1309	1201.04	1200.55	2	2399.08	20.85	531.968	-	-	No	1	0.61	119.3	132.1	-1	TRUE	-	2-7-0-0-0	0-1-0-0-0	Hex-Hex-Hex-Hex-(Hex-)Hex-HexNAc-HexNAc+HexNAc1	Hex-Hex-Hex-(Hex-Hex-)Hex-HexNAc-HexNAc+HexNAc1	Hex-Hex-(Hex-Hex-Hex-)Hex-HexNAc-HexNAc+HexNAc1
					1316	1309	1008.47	1007.96	2	2013.91	20.86	859.395	-	-	No	0	1	102.78	0	0	FALSE	-	2-3-0-0-0		Hex-(Hex-)Hex-HexNAc-HexNAc+Hex
					1318	1309	752.374	751.381	2	1500.75	20.87	642.47	-	-	No	0	1	73.72	0	0	FALSE	-	2-3-0-0-0		Hex-(Hex-)Hex-HexNAc-HexNAc+Hex
					1321	1320	770.04	769.705	3	2306.09	20.89	529.276	-	-	No	0	1	119.37	0	0	FALSE	-	2-3-0-0-0		Hex-(Hex-)Hex-HexNAc-HexNAc+Hex	Hex-(Hex-)Hex-HexNAc-(DeHex-)HexNAc+Hex
					1323	1320	751.872	750.861	2	1499.71	20.91	698.69	-	-	No	0	1	101.49	0	0	FALSE	-	2-3-0-0-0		Hex-(Hex-)Hex-HexNAc-HexNAc+Hex
					1325	1320	711.361	711.361	4	2841.41	20.92	484.223	-	-	No	0	1	102.76	0	0	FALSE	-	2-3-0-0-0		Hex-(Hex-)Hex-HexNAc-HexNAc+Hex	Hex-(Hex-)Hex-HexNAc-(DeHex-)HexNAc+Hex
					1327	1320	918.38	918.049	3	2751.12	20.93	627.628	-	-	No	0	1	105.88	97.31	0	FALSE	-	2-7-0-0-0		Hex-Hex-Hex-Hex-Hex-(Hex-)Hex-HexNAc-HexNAc+Hex	Hex-Hex-Hex-(Hex-Hex-Hex-)Hex-HexNAc-HexNAc+Hex	Hex-Hex-Hex-Hex-(Hex-Hex-)Hex-HexNAc-HexNAc+Hex
					1329	1320	729.042	728.716	3	2183.13	20.94	626.644	-	-	No	0	1	105.55	0	0	FALSE	-	2-3-0-0-0		Hex-(Hex-)Hex-HexNAc-HexNAc+Hex
					1332	1331	702.987	702.653	3	2104.94	20.96	606.255	-	-	No	0	1	132.29	0	0	FALSE	-	2-3-0-0-0		Hex-(Hex-)Hex-HexNAc-HexNAc+Hex
					1334	1331	861.727	861.394	3	2581.16	20.97	834.979	-	-	No	0	1	101.06	2.15	0	FALSE	-	2-4-0-0-0		Hex-Hex-(Hex-)Hex-HexNAc-HexNAc+Hex	Hex-(Hex-Hex-)Hex-HexNAc-HexNAc+Hex
					1336	1331	745.835	745.835	2	1489.66	20.98	736.685	-	-	No	0	1	103.79	0	0	FALSE	-	2-3-0-0-0		Hex-(Hex-)Hex-HexNAc-HexNAc+Hex	Hex-(Hex-)Hex-HexNAc-(DeHex-)HexNAc+Hex
					1338	1331	788.294	787.799	4	3147.17	20.99	825.999	-	-	No	0	1	258.06	0	0	FALSE	-	2-3-1-0-0		Hex-(Hex-)Hex-HexNAc-(DeHex-)HexNAc+Hex	Hex-(Hex-)Hex-HexNAc-HexNAc+Hex
					1340	1331	781.977	781.977	3	2342.91	21	645.294	-	-	No	0	1	101.83	0	0	FALSE	-	2-3-1-0-0		Hex-(Hex-)Hex-HexNAc-(DeHex-)HexNAc+Hex
					1343	1342	754.996	754.662	3	2260.96	21.02	742.984	-	-	No	0	1	123.54	0	0	FALSE	-	2-3-1-0-0		Hex-(Hex-)Hex-HexNAc-(DeHex-)HexNAc+Hex	Hex-(Hex-)Hex-HexNAc-HexNAc+Hex
					1345	1342	734.346	734.346	2	1466.68	21.03	698.899	-	-	No	0	1	9.37	0	0	FALSE	-	2-3-0-0-0		Hex-(Hex-)Hex-HexNAc-HexNAc+Hex
					1347	1342	664.811	664.811	2	1327.61	21.04	521.335	-	-	No	0	1	104.17	0	0	FALSE	-	2-3-0-0-0		Hex-(Hex-)Hex-HexNAc-HexNAc+Hex
					1349	1342	784.402	784.402	2	1566.79	21.05	775.235	-	-	No	0	1	115.31	0	0	FALSE	-	2-3-0-0-0		Hex-(Hex-)Hex-HexNAc-HexNAc+Hex
					1351	1342	985.444	985.444	2	1968.87	21.06	880.715	-	-	No	0	1	100.5	0	0	FALSE	-	2-3-0-0-0		Hex-(Hex-)Hex-HexNAc-HexNAc+Hex
					1354	1353	815.866	815.36	2	1628.7	21.08	807.236	-	-	No	0	1	101.7	0	0	FALSE	-	2-3-0-0-0		Hex-(Hex-)Hex-HexNAc-HexNAc+Hex
					1356	1353	857.034	856.368	3	2566.08	21.09	365.181	-	-	No	0	1	39.17	347.67	0	FALSE	-	4-4-0-1-0		NeuAc-Hex-HexNAc-Hex-(HexNAc-Hex-)Hex-HexNAc-HexNAc+Hex	NeuAc-Hex-HexNAc-(HexNAc-)Hex-(Hex-)Hex-HexNAc-HexNAc+Hex
					1358	1353	851.006	850.673	3	2549	21.1	812.732	-	-	No	0	1	104.36	0	0	FALSE	-	2-3-1-0-0		Hex-(Hex-)Hex-HexNAc-(DeHex-)HexNAc+Hex	Hex-(Hex-)Hex-HexNAc-HexNAc+Hex
					1360	1353	1119.52	1119.52	2	2237.01	21.11	612.635	-	-	No	0	1	129.65	0	0	FALSE	-	2-3-1-0-0		Hex-(Hex-)Hex-HexNAc-(DeHex-)HexNAc+Hex
					1362	1353	924.389	924.389	3	2770.14	21.13	547.268	-	-	No	0	0.84	134.57	92.45	0	FALSE	-	5-3-0-0-0		HexNAc-(HexNAc-)Hex-(HexNAc-Hex-)Hex-HexNAc-HexNAc+Hex	HexNAc-Hex-(HexNAc-(HexNAc-)Hex-)Hex-HexNAc-HexNAc+Hex
					1365	1364	668.284	667.95	3	2000.83	21.15	632.396	-	-	No	0	1	133.78	0	0	FALSE	-	2-3-0-0-0		Hex-(Hex-)Hex-HexNAc-HexNAc+Hex
					1367	1364	661.989	661.656	3	1981.95	21.16	473.979	-	-	No	0	1	114.24	0	0	FALSE	-	2-3-0-0-0		Hex-(Hex-)Hex-HexNAc-HexNAc+Hex
					1369	1364	915.418	914.917	2	1827.82	21.17	655.324	-	-	No	0	1	118.92	0	0	FALSE	-	2-3-1-0-0		Hex-(Hex-)Hex-HexNAc-(DeHex-)HexNAc+Hex	Hex-(Hex-)Hex-HexNAc-HexNAc+Hex
					1371	1364	977.759	977.428	3	2929.26	21.18	716.154	-	-	No	0	1	171.54	251.44	-1	TRUE	-	2-8-0-0-0	0-1-0-0-0	Hex-Hex-Hex-Hex-Hex-(Hex-)Hex-HexNAc-HexNAc+HexNAc1	Hex-Hex-Hex-Hex-(Hex-Hex-)Hex-HexNAc-HexNAc+HexNAc1	Hex-Hex-Hex-(Hex-Hex-Hex-)Hex-HexNAc-HexNAc+HexNAc1
					1373	1364	957.963	957.463	2	1912.91	21.19	909.238	-	-	No	0	1	107.73	0	0	FALSE	-	2-3-0-0-0		Hex-(Hex-)Hex-HexNAc-HexNAc+Hex
					1376	1375	1338.55	1338.55	2	2675.08	21.21	507.267	-	-	No	0	1	16.69	133.05	0	FALSE	-	2-8-0-0-0		Hex-Hex-Hex-Hex-Hex-Hex-(Hex-)Hex-HexNAc-HexNAc+Hex	Hex-Hex-Hex-(Hex-Hex-Hex-Hex-)Hex-HexNAc-HexNAc+Hex	Hex-Hex-Hex-Hex-(Hex-Hex-Hex-)Hex-HexNAc-HexNAc+Hex	Hex-Hex-Hex-Hex-Hex-(Hex-Hex-)Hex-HexNAc-HexNAc+Hex
					1378	1375	1001.41	1001.41	2	2000.82	21.23	283.159	-	-	No	0	1	8.4	178.14	0	FALSE	-	4-4-1-0-0		Hex-HexNAc-(HexNAc-)Hex-(Hex-)Hex-HexNAc-(DeHex-)HexNAc+Hex	HexNAc-Hex-(HexNAc-(Hex-)Hex-)Hex-HexNAc-(DeHex-)HexNAc+Hex	Hex-HexNAc-Hex-(HexNAc-Hex-)Hex-HexNAc-(DeHex-)HexNAc+Hex	HexNAc-(Hex-)Hex-(HexNAc-Hex-)Hex-HexNAc-(DeHex-)HexNAc+Hex	HexNAc-(HexNAc-)Hex-(Hex-Hex-)Hex-HexNAc-(DeHex-)HexNAc+Hex	HexNAc-(Hex-HexNAc-)Hex-(Hex-)Hex-HexNAc-(DeHex-)HexNAc+Hex	HexNAc-Hex-(Hex-HexNAc-Hex-)Hex-HexNAc-(DeHex-)HexNAc+Hex
					1380	1375	1254.49	1253.98	2	2505.95	21.24	845.498	-	-	No	0	1	146.15	0	0	FALSE	-	2-3-0-0-0		Hex-(Hex-)Hex-HexNAc-HexNAc+Hex
					1382	1375	934.395	933.388	2	1864.76	21.25	815.511	-	-	No	0	1	147.84	0	0	FALSE	-	2-3-0-0-0		Hex-(Hex-)Hex-HexNAc-HexNAc+Hex
					1384	1375	918.385	918.046	3	2751.12	21.26	365.181	-	-	No	0	1	1.87	138.76	0	FALSE	-	2-8-0-0-0		Hex-Hex-Hex-(Hex-Hex-Hex-Hex-)Hex-HexNAc-HexNAc+Hex	Hex-Hex-Hex-Hex-(Hex-Hex-Hex-)Hex-HexNAc-HexNAc+Hex	Hex-Hex-Hex-Hex-Hex-(Hex-Hex-)Hex-HexNAc-HexNAc+Hex	Hex-Hex-Hex-Hex-Hex-Hex-(Hex-)Hex-HexNAc-HexNAc+Hex
					1387	1386	771.407	771.407	2	1540.8	21.28	698.634	-	-	No	0	1	122.29	0	0	FALSE	-	2-3-0-0-0		Hex-(Hex-)Hex-HexNAc-HexNAc+Hex
					1389	1386	1131.99	1131.49	2	2260.96	21.3	1082.85	-	-	No	0	1	103.59	0	0	FALSE	-	2-3-0-0-0		Hex-(Hex-)Hex-HexNAc-HexNAc+Hex
					1391	1386	982.462	981.958	2	1961.9	21.31	964.7	-	-	No	0	1	124.46	0	0	FALSE	-	2-3-0-0-0		Hex-(Hex-)Hex-HexNAc-HexNAc+Hex
					1393	1386	987.092	987.092	3	2958.25	21.32	696.614	-	-	No	0	1	22.15	122.84	0	FALSE	-	3-5-1-0-0		Hex-(Hex-)Hex-(HexNAc-Hex-)Hex-HexNAc-(DeHex-)HexNAc+Hex	Hex-Hex-(HexNAc-(Hex-)Hex-)Hex-HexNAc-(DeHex-)HexNAc+Hex	Hex-Hex-(Hex-HexNAc-Hex-)Hex-HexNAc-(DeHex-)HexNAc+Hex
					1395	1386	1028.54	1028.54	3	3082.6	21.34	1011.04	-	-	No	0	1	103.95	0	0	FALSE	-	2-3-0-0-0		Hex-(Hex-)Hex-HexNAc-HexNAc+Hex
					1398	1397	805.317	805.317	2	1608.62	21.36	752.252	-	-	No	0	1	103.97	0	0	FALSE	-	2-3-0-0-0		Hex-(Hex-)Hex-HexNAc-HexNAc+Hex
					1400	1397	893.032	892.697	3	2675.07	21.37	265.142	-	-	No	0	1	9.92	146.03	0	FALSE	-	2-10-0-0-0		Hex-Hex-Hex-Hex-(Hex-Hex-Hex-Hex-Hex-)Hex-HexNAc-HexNAc+Hex	Hex-Hex-Hex-Hex-Hex-Hex-(Hex-Hex-Hex-)Hex-HexNAc-HexNAc+Hex	Hex-Hex-Hex-Hex-Hex-Hex-Hex-(Hex-Hex-)Hex-HexNAc-HexNAc+Hex	Hex-Hex-Hex-Hex-Hex-Hex-Hex-Hex-(Hex-)Hex-HexNAc-HexNAc+Hex	Hex-Hex-Hex-Hex-Hex-(Hex-Hex-Hex-Hex-)Hex-HexNAc-HexNAc+Hex
					1402	1397	858.927	858.927	2	1715.84	21.39	543.914	-	-	No	0	1	103.92	0	0	FALSE	-	2-3-0-0-0		Hex-(Hex-)Hex-HexNAc-HexNAc+Hex
					1404	1397	905.673	905.347	3	2713.02	21.4	696.614	-	-	No	0	1	102.64	0	0	FALSE	-	2-3-1-0-0		Hex-(Hex-)Hex-HexNAc-(DeHex-)HexNAc+Hex
					1406	1397	1151.5	1151.5	2	2300.99	21.41	470.973	-	-	No	0	1	22.74	144.34	0	FALSE	-	3-5-0-0-0		Hex-HexNAc-(Hex-)Hex-(Hex-)Hex-HexNAc-HexNAc+Hex	Hex-HexNAc-Hex-(Hex-Hex-)Hex-HexNAc-HexNAc+Hex	HexNAc-Hex-(Hex-(Hex-)Hex-)Hex-HexNAc-HexNAc+Hex	HexNAc-Hex-(Hex-Hex-Hex-)Hex-HexNAc-HexNAc+Hex	HexNAc-(Hex-)Hex-(Hex-Hex-)Hex-HexNAc-HexNAc+Hex	HexNAc-(Hex-Hex-)Hex-(Hex-)Hex-HexNAc-HexNAc+Hex
					1409	1408	768.335	768.002	3	2300.98	21.43	470.973	-	-	No	0	1	59.59	80.11	0	FALSE	-	3-5-0-0-0		HexNAc-(Hex-Hex-)Hex-(Hex-)Hex-HexNAc-HexNAc+Hex	Hex-HexNAc-(Hex-)Hex-(Hex-)Hex-HexNAc-HexNAc+Hex	HexNAc-(Hex-)Hex-(Hex-Hex-)Hex-HexNAc-HexNAc+Hex	HexNAc-Hex-(Hex-Hex-Hex-)Hex-HexNAc-HexNAc+Hex	HexNAc-Hex-(Hex-(Hex-)Hex-)Hex-HexNAc-HexNAc+Hex	Hex-HexNAc-Hex-(Hex-Hex-)Hex-HexNAc-HexNAc+Hex
					1411	1408	828.974	828.641	3	2482.9	21.45	722.551	-	-	No	0	1	130.87	0	0	FALSE	-	2-3-0-0-0		Hex-(Hex-)Hex-HexNAc-HexNAc+Hex
					1413	1408	676.804	676.804	2	1351.59	21.46	641.641	-	-	No	0	1	105.35	0	0	FALSE	-	2-3-0-0-0		Hex-(Hex-)Hex-HexNAc-HexNAc+Hex
					1415	1408	847.741	847.741	3	2540.2	21.47	470.973	-	-	No	0	1	120.94	0	0	FALSE	-	2-3-1-0-0		Hex-(Hex-)Hex-HexNAc-(DeHex-)HexNAc+Hex	Hex-(Hex-)Hex-HexNAc-HexNAc+Hex
					1417	1408	822.352	822.017	3	2463.03	21.48	543.914	-	-	No	0	0.97	109.17	75.36	0	FALSE	-	3-5-0-0-0		HexNAc-Hex-(Hex-(Hex-)Hex-)Hex-HexNAc-HexNAc+Hex	HexNAc-Hex-(Hex-Hex-Hex-)Hex-HexNAc-HexNAc+Hex	HexNAc-(Hex-Hex-)Hex-(Hex-)Hex-HexNAc-HexNAc+Hex	HexNAc-(Hex-)Hex-(Hex-Hex-)Hex-HexNAc-HexNAc+Hex	Hex-HexNAc-(Hex-)Hex-(Hex-)Hex-HexNAc-HexNAc+Hex	Hex-HexNAc-Hex-(Hex-Hex-)Hex-HexNAc-HexNAc+Hex
					1420	1419	797.351	797.351	2	1592.69	21.49	400.157	-	-	No	0	1	100.41	0	0	FALSE	-	2-3-0-0-0		Hex-(Hex-)Hex-HexNAc-HexNAc+Hex
					1422	1419	808.422	807.427	2	1612.84	21.51	569.969	-	-	No	0	1	4.28	0	0	FALSE	-	2-3-0-0-0		Hex-(Hex-)Hex-HexNAc-HexNAc+Hex
					1426	1419	1034.44	1034.44	2	2066.87	21.53	880.406	-	-	No	0	1	103.12	0	0	FALSE	-	2-3-0-0-0		Hex-(Hex-)Hex-HexNAc-HexNAc+Hex
					1428	1419	1036.77	1036.77	3	3107.27	21.54	657.337	-	-	No	0	0.6	122.1	70.71	0	FALSE	-	5-3-2-0-0		DeHex-HexNAc-(HexNAc-)Hex-(HexNAc-Hex-)Hex-HexNAc-(DeHex-)HexNAc+Hex	DeHex-HexNAc-Hex-(HexNAc-(HexNAc-)Hex-)Hex-HexNAc-(DeHex-)HexNAc+Hex
					1431	1430	726.892	726.892	2	1451.77	21.56	509.919	-	-	No	0	1	95.68	0	0	FALSE	-	2-3-0-0-0		Hex-(Hex-)Hex-HexNAc-HexNAc+Hex
					1433	1430	808.424	807.422	2	1612.83	21.57	655.324	-	-	No	0	1	20.8	0	0	FALSE	-	2-3-0-0-0		Hex-(Hex-)Hex-HexNAc-HexNAc+Hex
					1435	1430	930.91	930.409	2	1858.8	21.58	878.249	-	-	No	0	1	100.88	0	0	FALSE	-	2-3-1-0-0		Hex-(Hex-)Hex-HexNAc-(DeHex-)HexNAc+Hex	Hex-(Hex-)Hex-HexNAc-HexNAc+Hex
					1439	1430	1060.98	1060.49	2	2118.97	21.61	653.634	-	-	No	0	1	43.31	0	0	FALSE	-	2-3-0-0-0		Hex-(Hex-)Hex-HexNAc-HexNAc+Hex	Hex-(Hex-)Hex-HexNAc-(DeHex-)HexNAc+Hex
					1442	1441	880.392	879.896	2	1757.78	21.63	1116.17	-	-	No	0	1	5.62	0	0	FALSE	-	2-3-0-0-0		Hex-(Hex-)Hex-HexNAc-HexNAc+Hex
					1444	1441	1038.49	1038.49	2	2074.97	21.64	612.635	-	-	No	0	1	203.52	0	0	FALSE	-	2-3-1-0-0		Hex-(Hex-)Hex-HexNAc-(DeHex-)HexNAc+Hex
					1446	1441	800.902	800.408	2	1598.8	21.65	791.687	-	-	No	0	1	103.92	0	0	FALSE	-	2-3-0-0-0		Hex-(Hex-)Hex-HexNAc-HexNAc+Hex	Hex-(Hex-)Hex-HexNAc-(DeHex-)HexNAc+Hex
					1448	1441	826.405	825.905	2	1649.8	21.66	671.293	-	-	No	0	1	86.08	0	0	FALSE	-	2-3-0-0-0		Hex-(Hex-)Hex-HexNAc-HexNAc+Hex
					1450	1441	842.36	842.36	3	2524.06	21.68	457.28	-	-	No	0	0.9	9.98	100	0	FALSE	-	2-4-1-0-0		Hex-Hex-(Hex-)Hex-HexNAc-(DeHex-)HexNAc+Hex	Hex-(Hex-Hex-)Hex-HexNAc-(DeHex-)HexNAc+Hex
					1453	1452	678.314	677.982	3	2030.93	21.69	521.77	-	-	No	0	1	110.33	0	0	FALSE	-	2-3-1-0-0		Hex-(Hex-)Hex-HexNAc-(DeHex-)HexNAc+Hex	Hex-(Hex-)Hex-HexNAc-HexNAc+Hex
					1455	1452	837.688	837.352	3	2509.04	21.71	801.803	-	-	No	0	1	124.62	4.67	0	FALSE	-	3-3-0-0-0		HexNAc-Hex-(Hex-)Hex-HexNAc-HexNAc+Hex	Hex-(HexNAc-Hex-)Hex-HexNAc-HexNAc+Hex
					1457	1452	724.8	724.8	2	1447.59	21.72	508.998	-	-	No	0	1	113.74	0	0	FALSE	-	2-3-0-0-0		Hex-(Hex-)Hex-HexNAc-HexNAc+Hex
					1459	1452	654.296	653.632	3	1957.87	21.73	437.218	-	-	No	0	1	108.59	0	0	FALSE	-	2-3-0-0-0		Hex-(Hex-)Hex-HexNAc-HexNAc+Hex
					1461	1452	943.454	943.118	3	2826.33	21.74	756.378	-	-	No	0	1	116.68	0	0	FALSE	-	2-3-0-0-0		Hex-(Hex-)Hex-HexNAc-HexNAc+Hex	Hex-(Hex-)Hex-HexNAc-(DeHex-)HexNAc+Hex
					1464	1463	658.079	657.828	4	2627.28	21.76	671.293	-	-	No	0	1	118.22	0	0	FALSE	-	2-3-0-0-0		Hex-(Hex-)Hex-HexNAc-HexNAc+Hex
					1466	1463	732.376	732.376	2	1462.74	21.77	437.218	-	-	No	0	1	102.21	0	0	FALSE	-	2-3-1-0-0		Hex-(Hex-)Hex-HexNAc-(DeHex-)HexNAc+Hex	Hex-(Hex-)Hex-HexNAc-HexNAc+Hex
					1468	1463	692.99	692.658	3	2074.95	21.78	531.986	-	-	No	0	1	160.57	0	-2	TRUE	-	2-5-0-0-0	0-2-0-0-0	Hex-(Hex-)Hex-HexNAc-HexNAc+HexNAc2
					1470	1463	885.051	885.051	3	2652.13	21.79	587.292	-	-	No	0	0.84	102.79	0.52	0	FALSE	-	4-5-0-0-0		HexNAc-Hex-Hex-Hex-(HexNAc-Hex-)Hex-HexNAc-HexNAc+Hex
					1472	1463	898.693	898.693	3	2693.06	21.8	846.184	-	-	No	0	1	101.01	0	0	FALSE	-	2-3-0-0-0		Hex-(Hex-)Hex-HexNAc-HexNAc+Hex
					1475	1474	1256.02	1255.53	2	2509.04	21.82	1135.58	-	-	No	0	1	143.24	0	0	FALSE	-	2-3-0-0-0		Hex-(Hex-)Hex-HexNAc-HexNAc+Hex	Hex-(Hex-)Hex-HexNAc-(DeHex-)HexNAc+Hex
					1479	1474	1348.04	1347.04	2	2692.06	21.84	904.567	-	-	No	0	1	58.71	56.13	0	FALSE	-	2-4-0-0-0		Hex-Hex-(Hex-)Hex-HexNAc-HexNAc+Hex	Hex-(Hex-Hex-)Hex-HexNAc-HexNAc+Hex
					1481	1474	819.366	819.366	2	1636.72	21.85	529.276	-	-	No	0	1	16.7	0	0	FALSE	-	2-3-0-0-0		Hex-(Hex-)Hex-HexNAc-HexNAc+Hex	Hex-(Hex-)Hex-HexNAc-(DeHex-)HexNAc+Hex
					1483	1474	951.433	950.434	2	1898.85	21.86	815.367	-	-	No	0	1	71.82	0	0	FALSE	-	2-3-0-0-0		Hex-(Hex-)Hex-HexNAc-HexNAc+Hex
					1486	1485	707.325	707.325	3	2118.95	21.88	586.247	-	-	No	0	1	131.64	0	0	FALSE	-	2-3-1-0-0		Hex-(Hex-)Hex-HexNAc-(DeHex-)HexNAc+Hex	Hex-(Hex-)Hex-HexNAc-HexNAc+Hex
					1488	1485	690.315	690.315	2	1378.62	21.9	641.612	-	-	No	0	1	102.07	0	0	FALSE	-	2-3-0-0-0		Hex-(Hex-)Hex-HexNAc-HexNAc+Hex
					1490	1485	882.683	882.016	3	2643.03	21.9	515.579	-	-	No	0	1	0.33	100.23	0	FALSE	-	3-4-0-0-0		HexNAc-(Hex-)Hex-(Hex-)Hex-HexNAc-HexNAc+Hex	Hex-HexNAc-Hex-(Hex-)Hex-HexNAc-HexNAc+Hex	HexNAc-Hex-(Hex-Hex-)Hex-HexNAc-HexNAc+Hex
					1492	1485	962.461	962.125	3	2883.35	21.91	1099.95	-	-	No	0	1	120.67	0	0	FALSE	-	2-3-1-0-0		Hex-(Hex-)Hex-HexNAc-(DeHex-)HexNAc+Hex	Hex-(Hex-)Hex-HexNAc-HexNAc+Hex
					1494	1485	1213.82	1213.15	3	3636.44	21.92	1461.5	-	-	No	0	1	101.03	0	0	FALSE	-	2-3-1-0-0		Hex-(Hex-)Hex-HexNAc-(DeHex-)HexNAc+Hex	Hex-(Hex-)Hex-HexNAc-HexNAc+Hex
					1497	1496	675.286	675.286	2	1348.56	21.94	377.209	-	-	No	0	1	103.63	0	0	FALSE	-	2-3-0-0-0		Hex-(Hex-)Hex-HexNAc-HexNAc+Hex
					1499	1496	789.356	789.356	2	1576.7	21.96	736.71	-	-	No	0	1	110.66	0	0	FALSE	-	2-3-0-0-0		Hex-(Hex-)Hex-HexNAc-HexNAc+Hex
					1501	1496	1195.52	1195.52	2	2389.03	21.97	331.172	-	-	No	0	1	3.03	266.84	0	FALSE	-	4-6-0-0-0		HexNAc-(Hex-HexNAc-)Hex-(Hex-Hex-Hex-)Hex-HexNAc-HexNAc+Hex	Hex-(HexNAc-)Hex-(HexNAc-(Hex-Hex-)Hex-)Hex-HexNAc-HexNAc+Hex	Hex-(HexNAc-)Hex-(Hex-HexNAc-(Hex-)Hex-)Hex-HexNAc-HexNAc+Hex	Hex-(Hex-HexNAc-)Hex-(HexNAc-(Hex-)Hex-)Hex-HexNAc-HexNAc+Hex	HexNAc-(HexNAc-)Hex-(Hex-Hex-Hex-Hex-)Hex-HexNAc-HexNAc+Hex	HexNAc-(HexNAc-)Hex-(Hex-(Hex-Hex-)Hex-)Hex-HexNAc-HexNAc+Hex	HexNAc-(HexNAc-)Hex-(Hex-Hex-(Hex-)Hex-)Hex-HexNAc-HexNAc+Hex	HexNAc-(Hex-HexNAc-)Hex-(Hex-(Hex-)Hex-)Hex-HexNAc-HexNAc+Hex	Hex-HexNAc-(HexNAc-)Hex-(Hex-Hex-Hex-)Hex-HexNAc-HexNAc+Hex	Hex-HexNAc-(HexNAc-)Hex-(Hex-(Hex-)Hex-)Hex-HexNAc-HexNAc+Hex	Hex-HexNAc-(Hex-HexNAc-)Hex-(Hex-Hex-)Hex-HexNAc-HexNAc+Hex	Hex-HexNAc-(Hex-)Hex-(Hex-HexNAc-Hex-)Hex-HexNAc-HexNAc+Hex	Hex-Hex-(Hex-HexNAc-)Hex-(HexNAc-Hex-)Hex-HexNAc-HexNAc+Hex	Hex-Hex-(HexNAc-)Hex-(HexNAc-(Hex-)Hex-)Hex-HexNAc-HexNAc+Hex	Hex-Hex-(HexNAc-)Hex-(Hex-HexNAc-Hex-)Hex-HexNAc-HexNAc+Hex	Hex-HexNAc-(Hex-Hex-)Hex-(HexNAc-Hex-)Hex-HexNAc-HexNAc+Hex	Hex-HexNAc-(Hex-)Hex-(HexNAc-(Hex-)Hex-)Hex-HexNAc-HexNAc+Hex	Hex-(Hex-HexNAc-)Hex-(Hex-HexNAc-Hex-)Hex-HexNAc-HexNAc+Hex	Hex-Hex-Hex-(HexNAc-)Hex-(HexNAc-Hex-)Hex-HexNAc-HexNAc+Hex
					1503	1496	819.874	819.37	2	1636.73	21.98	766.851	-	-	No	0	1	101.12	0	0	FALSE	-	2-3-0-0-0		Hex-(Hex-)Hex-HexNAc-HexNAc+Hex
					1505	1496	1176.99	1176.48	2	2350.95	21.99	324.649	-	-	No	0	1	199.46	0	0	FALSE	-	2-3-1-0-0		Hex-(Hex-)Hex-HexNAc-(DeHex-)HexNAc+Hex	Hex-(Hex-)Hex-HexNAc-HexNAc+Hex
					1508	1507	705.092	705.092	4	2816.34	22.01	641.07	-	-	No	0	1	130.67	0	0	FALSE	-	2-3-1-0-0		Hex-(Hex-)Hex-HexNAc-(DeHex-)HexNAc+Hex	Hex-(Hex-)Hex-HexNAc-HexNAc+Hex
					1510	1507	812.376	812.376	3	2434.11	22.03	707.68	-	-	No	0	1	203.86	0.95	0	FALSE	-	3-3-0-0-0		HexNAc-Hex-(Hex-)Hex-HexNAc-HexNAc+Hex	Hex-(HexNAc-Hex-)Hex-HexNAc-HexNAc+Hex
					1512	1507	840.386	840.386	2	1678.76	22.04	714.151	-	-	No	0	1	114.11	0	0	FALSE	-	2-3-0-0-0		Hex-(Hex-)Hex-HexNAc-HexNAc+Hex
					1514	1507	1323.52	1323.01	2	2644.01	22.05	529.276	-	-	No	0	1	100.22	0	0	FALSE	-	2-3-0-0-0		Hex-(Hex-)Hex-HexNAc-HexNAc+Hex
					1516	1507	927.375	926.873	2	1851.73	22.06	874.704	-	-	No	0	1	101.93	0	0	FALSE	-	2-3-1-0-0		Hex-(Hex-)Hex-HexNAc-(DeHex-)HexNAc+Hex	Hex-(Hex-)Hex-HexNAc-HexNAc+Hex
					1519	1518	651.512	651.015	4	2600.03	22.08	386.936	-	-	No	0	1	0.52	101.25	0	FALSE	-	2-5-0-0-0		Hex-Hex-Hex-(Hex-)Hex-HexNAc-HexNAc+Hex	Hex-Hex-(Hex-Hex-)Hex-HexNAc-HexNAc+Hex
					1521	1518	670.641	670.641	3	2008.9	22.09	533.207	-	-	No	0	1	102.41	0	0	FALSE	-	2-3-1-0-0		Hex-(Hex-)Hex-HexNAc-(DeHex-)HexNAc+Hex
					1523	1518	901.05	900.717	3	2699.13	22.1	543.914	-	-	No	0	1	62.25	156.48	0	FALSE	-	3-6-1-0-0		Hex-(Hex-Hex-)Hex-(DeHex-HexNAc-Hex-)Hex-HexNAc-HexNAc+Hex	Hex-(Hex-)Hex-(DeHex-HexNAc-(Hex-)Hex-)Hex-HexNAc-HexNAc+Hex
					1525	1518	909.41	909.41	2	1816.81	22.11	378.692	-	-	No	0	1	101.52	0	0	FALSE	-	2-3-0-0-0		Hex-(Hex-)Hex-HexNAc-HexNAc+Hex	Hex-(Hex-)Hex-HexNAc-(DeHex-)HexNAc+Hex
					1527	1518	777.327	776.999	3	2327.98	22.13	339.159	-	-	No	0	1	3.65	146.28	0	FALSE	-	2-5-1-0-0		Hex-Hex-(Hex-Hex-)Hex-HexNAc-(DeHex-)HexNAc+Hex	Hex-Hex-Hex-(Hex-)Hex-HexNAc-(DeHex-)HexNAc+Hex
					1530	1529	737.359	737.107	4	2944.4	22.15	378.692	-	-	No	0	0.82	12.23	122.98	0	FALSE	-	4-4-2-0-0		DeHex-HexNAc-Hex-(Hex-(HexNAc-)Hex-)Hex-HexNAc-(DeHex-)HexNAc+Hex	DeHex-HexNAc-(HexNAc-)Hex-(Hex-Hex-)Hex-HexNAc-(DeHex-)HexNAc+Hex	DeHex-HexNAc-(Hex-)Hex-(HexNAc-Hex-)Hex-HexNAc-(DeHex-)HexNAc+Hex
					1532	1529	720.315	720.315	2	1438.62	22.16	340.491	-	-	No	0	1	6.65	0	0	FALSE	-	2-3-1-0-0		Hex-(Hex-)Hex-HexNAc-(DeHex-)HexNAc+Hex	Hex-(Hex-)Hex-HexNAc-HexNAc+Hex
					1534	1529	730.374	729.363	2	1456.71	22.17	721.63	-	-	No	0	1	104.47	0	0	FALSE	-	2-3-0-0-0		Hex-(Hex-)Hex-HexNAc-HexNAc+Hex
					1536	1529	1271.52	1271.03	2	2540.04	22.18	1041.71	-	-	No	0	0.67	147.54	0.18	0	FALSE	-	2-4-0-0-0		Hex-Hex-(Hex-)Hex-HexNAc-HexNAc+Hex	Hex-(Hex-Hex-)Hex-HexNAc-HexNAc+Hex
					1538	1529	1352.56	1352.07	2	2702.12	22.19	1041.66	-	-	No	0	1	127.73	1.06	0	FALSE	-	2-4-0-0-0		Hex-Hex-(Hex-)Hex-HexNAc-HexNAc+Hex	Hex-(Hex-Hex-)Hex-HexNAc-HexNAc+Hex
					1541	1540	739.659	739.405	4	2953.59	22.21	456.879	-	-	No	0	1	101.67	0	0	FALSE	-	2-3-1-0-0		Hex-(Hex-)Hex-HexNAc-(DeHex-)HexNAc+Hex	Hex-(Hex-)Hex-HexNAc-HexNAc+Hex
					1543	1540	832.328	832	3	2492.98	22.22	475.878	-	-	No	0	1	110.71	0	0	FALSE	-	2-3-0-0-0		Hex-(Hex-)Hex-HexNAc-HexNAc+Hex	Hex-(Hex-)Hex-HexNAc-(DeHex-)HexNAc+Hex
					1545	1540	1067.95	1067.45	2	2132.88	22.23	1016.71	-	-	No	0	1	5.01	0	0	FALSE	-	2-3-0-0-0		Hex-(Hex-)Hex-HexNAc-HexNAc+Hex	Hex-(Hex-)Hex-HexNAc-(DeHex-)HexNAc+Hex
					1547	1540	717.858	717.36	2	1432.71	22.24	665.676	-	-	No	0	1	100.82	0	0	FALSE	-	2-3-1-0-0		Hex-(Hex-)Hex-HexNAc-(DeHex-)HexNAc+Hex	Hex-(Hex-)Hex-HexNAc-HexNAc+Hex
					1549	1540	1207.48	1207.14	3	3618.41	22.25	979.812	-	-	No	1	1	166.25	57.54	-1	TRUE	-	2-9-0-0-0	0-1-0-0-0	Hex-Hex-Hex-Hex-Hex-Hex-(Hex-)Hex-HexNAc-HexNAc+HexNAc1	Hex-Hex-Hex-Hex-Hex-(Hex-Hex-)Hex-HexNAc-HexNAc+HexNAc1	Hex-Hex-Hex-Hex-(Hex-Hex-Hex-)Hex-HexNAc-HexNAc+HexNAc1	Hex-Hex-Hex-(Hex-Hex-Hex-Hex-)Hex-HexNAc-HexNAc+HexNAc1
					1552	1551	709.325	708.824	4	2831.27	22.27	608.724	-	-	No	0	0.96	101.68	0	0	FALSE	-	2-3-1-0-0		Hex-(Hex-)Hex-HexNAc-(DeHex-)HexNAc+Hex
					1554	1551	694.32	694.32	3	2079.94	22.29	386.936	-	-	No	0	1	89.11	58.86	0	FALSE	-	3-3-0-0-0		HexNAc-Hex-(Hex-)Hex-HexNAc-HexNAc+Hex	Hex-(HexNAc-Hex-)Hex-HexNAc-HexNAc+Hex
					1556	1551	868.345	868.013	3	2601.02	22.3	798.561	-	-	No	0	1	101.79	0	0	FALSE	-	2-3-0-0-0		Hex-(Hex-)Hex-HexNAc-HexNAc+Hex
					1558	1551	1026.07	1025.73	3	3074.17	22.31	451.876	-	-	No	0	1	0.87	163.62	-1	TRUE	-	3-10-1-0-0	0-1-0-0-0	Hex-HexNAc-(Hex-Hex-Hex-)Hex-(Hex-(Hex-)Hex-)Hex-HexNAc-(DeHex-)HexNAc+HexNAc1	Hex-HexNAc-(Hex-Hex-)Hex-(Hex-(Hex-Hex-)Hex-)Hex-HexNAc-(DeHex-)HexNAc+HexNAc1	Hex-Hex-Hex-Hex-(HexNAc-)Hex-(Hex-(Hex-)Hex-)Hex-HexNAc-(DeHex-)HexNAc+HexNAc1	Hex-Hex-Hex-(Hex-HexNAc-)Hex-(Hex-(Hex-)Hex-)Hex-HexNAc-(DeHex-)HexNAc+HexNAc1	Hex-Hex-Hex-(HexNAc-)Hex-(Hex-(Hex-Hex-)Hex-)Hex-HexNAc-(DeHex-)HexNAc+HexNAc1	Hex-Hex-(Hex-HexNAc-)Hex-(Hex-(Hex-Hex-)Hex-)Hex-HexNAc-(DeHex-)HexNAc+HexNAc1	Hex-Hex-Hex-Hex-(Hex-HexNAc-)Hex-(Hex-Hex-)Hex-HexNAc-(DeHex-)HexNAc+HexNAc1	Hex-Hex-Hex-Hex-Hex-(HexNAc-)Hex-(Hex-Hex-)Hex-HexNAc-(DeHex-)HexNAc+HexNAc1
					1560	1551	756.321	756.321	3	2265.94	22.32	721.687	-	-	No	0	1	102.38	0	0	FALSE	-	2-3-0-0-0		Hex-(Hex-)Hex-HexNAc-HexNAc+Hex
					1563	1562	775.331	775.331	2	1548.65	22.34	723.182	-	-	No	0	1	117.11	0	0	FALSE	-	2-3-0-0-0		Hex-(Hex-)Hex-HexNAc-HexNAc+Hex
					1565	1562	763.069	762.867	5	3809.3	22.35	709.822	-	-	No	0	1	153.99	0	0	FALSE	-	2-3-1-0-0		Hex-(Hex-)Hex-HexNAc-(DeHex-)HexNAc+Hex	Hex-(Hex-)Hex-HexNAc-HexNAc+Hex
					1567	1562	1099.78	1099.11	3	3294.3	22.36	553.286	-	-	No	0	1	1.77	190.54	0	FALSE	-	3-10-0-0-0		Hex-Hex-Hex-Hex-Hex-Hex-(HexNAc-)Hex-(Hex-Hex-)Hex-HexNAc-HexNAc+Hex	Hex-Hex-Hex-Hex-(Hex-HexNAc-)Hex-(Hex-(Hex-)Hex-)Hex-HexNAc-HexNAc+Hex	Hex-Hex-Hex-(Hex-HexNAc-)Hex-(Hex-(Hex-Hex-)Hex-)Hex-HexNAc-HexNAc+Hex	Hex-Hex-Hex-Hex-Hex-(HexNAc-)Hex-(Hex-(Hex-)Hex-)Hex-HexNAc-HexNAc+Hex	Hex-Hex-Hex-Hex-(HexNAc-)Hex-(Hex-(Hex-Hex-)Hex-)Hex-HexNAc-HexNAc+Hex	Hex-Hex-Hex-Hex-Hex-(Hex-HexNAc-)Hex-(Hex-Hex-)Hex-HexNAc-HexNAc+Hex
					1569	1562	1147.97	1147.46	2	2292.92	22.37	1518.8	-	-	No	0	1	102.53	0	0	FALSE	-	2-3-0-0-0		Hex-(Hex-)Hex-HexNAc-HexNAc+Hex
					1571	1562	801.405	801.405	2	1600.8	22.39	783.765	-	-	No	0	1	106.1	0	0	FALSE	-	2-3-0-0-0		Hex-(Hex-)Hex-HexNAc-HexNAc+Hex
					1574	1573	699.31	699.31	2	1396.61	22.41	690.282	-	-	No	0	1	136.28	0	0	FALSE	-	2-3-1-0-0		Hex-(Hex-)Hex-HexNAc-(DeHex-)HexNAc+Hex	Hex-(Hex-)Hex-HexNAc-HexNAc+Hex
					1576	1573	712.302	711.969	3	2132.89	22.42	677.353	-	-	No	0	1	101.38	0	0	FALSE	-	2-3-0-0-0		Hex-(Hex-)Hex-HexNAc-HexNAc+Hex
					1578	1573	744.395	744.058	3	2229.15	22.43	692.539	-	-	No	0	1	104.24	0	0	FALSE	-	2-3-1-0-0		Hex-(Hex-)Hex-HexNAc-(DeHex-)HexNAc+Hex	Hex-(Hex-)Hex-HexNAc-HexNAc+Hex
					1580	1573	750.403	750.403	2	1498.79	22.44	698.184	-	-	No	0	1	100.49	0	0	FALSE	-	2-3-0-0-0		Hex-(Hex-)Hex-HexNAc-HexNAc+Hex
					1582	1573	683.331	682.664	3	2044.97	22.45	430.201	-	-	No	0	1	102.37	0	0	FALSE	-	2-3-1-0-0		Hex-(Hex-)Hex-HexNAc-(DeHex-)HexNAc+Hex	Hex-(Hex-)Hex-HexNAc-HexNAc+Hex
					1585	1584	702.347	702.347	2	1402.68	22.47	430.201	-	-	No	0	1	175.39	0	0	FALSE	-	2-3-0-0-0		Hex-(Hex-)Hex-HexNAc-HexNAc+Hex
					1587	1584	696.315	695.985	3	2084.93	22.48	593.544	-	-	No	0	1	121.42	0	0	FALSE	-	2-3-1-0-0		Hex-(Hex-)Hex-HexNAc-(DeHex-)HexNAc+Hex	Hex-(Hex-)Hex-HexNAc-HexNAc+Hex
					1589	1584	746.849	746.849	2	1491.68	22.49	693.668	-	-	No	0	1	111.69	0	0	FALSE	-	2-3-0-0-0		Hex-(Hex-)Hex-HexNAc-HexNAc+Hex
					1591	1584	870.732	870.398	3	2608.17	22.5	661.337	-	-	No	0	1	102.37	0	-2	TRUE	-	2-3-0-1-1	0-0-0-1-1	Hex-(Hex-)Hex-HexNAc-HexNAc+NeuAc1NeuGc1
					1593	1584	855.383	854.886	2	1707.76	22.51	802.735	-	-	No	0	1	100.88	0	0	FALSE	-	2-3-0-0-0		Hex-(Hex-)Hex-HexNAc-HexNAc+Hex
					1596	1595	663.321	663.321	3	1986.94	22.53	586.857	-	-	No	0	1	113.72	0	0	FALSE	-	2-3-1-0-0		Hex-(Hex-)Hex-HexNAc-(DeHex-)HexNAc+Hex
					1598	1595	784.329	784.329	2	1566.64	22.54	731.247	-	-	No	0	1	63.72	0	0	FALSE	-	2-3-1-0-0		Hex-(Hex-)Hex-HexNAc-(DeHex-)HexNAc+Hex
					1600	1595	781.988	781.659	3	2341.95	22.55	481.481	-	-	No	0	1	133.53	17.46	0	FALSE	-	3-5-0-0-0		HexNAc-Hex-Hex-Hex-(Hex-)Hex-HexNAc-HexNAc+Hex	Hex-Hex-Hex-(HexNAc-Hex-)Hex-HexNAc-HexNAc+Hex
					1604	1595	1043.98	1043.98	2	2085.95	22.57	689.853	-	-	No	0	1	110.76	0	0	FALSE	-	2-3-0-0-0		Hex-(Hex-)Hex-HexNAc-HexNAc+Hex
					1607	1606	764.841	764.841	2	1527.67	22.59	755.682	-	-	No	0	1	106.75	0	0	FALSE	-	2-3-0-0-0		Hex-(Hex-)Hex-HexNAc-HexNAc+Hex
					1609	1606	1551.24	1550.73	2	3099.45	22.61	1244.72	-	-	No	0	1	108.37	0	0	FALSE	-	2-3-1-0-0		Hex-(Hex-)Hex-HexNAc-(DeHex-)HexNAc+Hex	Hex-(Hex-)Hex-HexNAc-HexNAc+Hex
					1611	1606	972.048	971.708	3	2912.1	22.62	950.775	-	-	No	0	1	133.72	0	0	FALSE	-	2-3-1-0-0		Hex-(Hex-)Hex-HexNAc-(DeHex-)HexNAc+Hex
					1615	1606	1192.52	1192.52	2	2383.02	22.64	1046.7	-	-	No	0	1	119.86	0	0	FALSE	-	2-3-0-0-0		Hex-(Hex-)Hex-HexNAc-HexNAc+Hex
					1618	1617	1015.15	1014.82	3	3041.42	22.66	1199.42	-	-	No	0	1	102.31	0	0	FALSE	-	2-3-0-0-0		Hex-(Hex-)Hex-HexNAc-HexNAc+Hex
					1620	1617	1041.48	1041.15	3	3120.43	22.67	756.378	-	-	No	0	1	106.27	11.75	0	FALSE	-	2-7-0-0-0		Hex-Hex-Hex-(Hex-Hex-Hex-)Hex-HexNAc-HexNAc+Hex	Hex-Hex-Hex-Hex-(Hex-Hex-)Hex-HexNAc-HexNAc+Hex	Hex-Hex-Hex-Hex-Hex-(Hex-)Hex-HexNAc-HexNAc+Hex
					1622	1617	1075.96	1075.46	2	2148.9	22.68	447.864	-	-	No	0	1	0.08	1.85	0	FALSE	-	2-5-1-0-0		Hex-Hex-(Hex-Hex-)Hex-HexNAc-(DeHex-)HexNAc+Hex	Hex-Hex-Hex-(Hex-)Hex-HexNAc-(DeHex-)HexNAc+Hex
					1624	1617	1112	1111.5	2	2220.98	22.69	681.351	-	-	No	0	1	115.63	0	0	FALSE	-	2-3-0-0-0		Hex-(Hex-)Hex-HexNAc-HexNAc+Hex
					1626	1617	1522.21	1521.71	2	3041.4	22.71	1142.94	-	-	No	0	1	104.34	0	0	FALSE	-	2-3-1-0-0		Hex-(Hex-)Hex-HexNAc-(DeHex-)HexNAc+Hex	Hex-(Hex-)Hex-HexNAc-HexNAc+Hex
					1631	1628	1003.41	1002.91	2	2003.81	22.74	783.611	-	-	No	0	1	72.9	0	0	FALSE	-	2-3-0-0-0		Hex-(Hex-)Hex-HexNAc-HexNAc+Hex
					1633	1628	1107.49	1107.49	2	2212.96	22.75	979.632	-	-	No	0	1	141.59	0	0	FALSE	-	2-3-0-0-0		Hex-(Hex-)Hex-HexNAc-HexNAc+Hex
					1635	1628	1459.08	1458.57	2	2915.13	22.77	951.601	-	-	No	0	0.68	216.97	81.73	-1	TRUE	-	2-5-0-0-0	0-1-0-0-0	Hex-Hex-(Hex-)Hex-HexNAc-HexNAc+HexNAc1	Hex-(Hex-Hex-)Hex-HexNAc-HexNAc+HexNAc1
					1637	1628	1057.76	1057.42	3	3169.24	22.78	783.682	-	-	No	0	1	160.84	37.16	0	FALSE	-	2-7-0-0-0		Hex-Hex-Hex-Hex-(Hex-Hex-)Hex-HexNAc-HexNAc+Hex	Hex-Hex-Hex-Hex-Hex-(Hex-)Hex-HexNAc-HexNAc+Hex	Hex-Hex-Hex-(Hex-Hex-Hex-)Hex-HexNAc-HexNAc+Hex
					1640	1639	772.369	771.874	2	1541.73	22.8	679.591	-	-	No	0	1	46.22	0	0	FALSE	-	2-3-0-0-0		Hex-(Hex-)Hex-HexNAc-HexNAc+Hex
					1642	1639	1224.52	1224.02	2	2446.02	22.81	1206.39	-	-	No	0	1	109.13	0	0	FALSE	-	2-3-0-0-0		Hex-(Hex-)Hex-HexNAc-HexNAc+Hex
					1646	1639	984.344	983.847	2	1965.68	22.83	587.36	-	-	No	0	1	100.89	0	0	FALSE	-	2-3-1-0-0		Hex-(Hex-)Hex-HexNAc-(DeHex-)HexNAc+Hex
					1648	1639	1028.14	1027.81	3	3080.42	22.84	1007.73	-	-	No	0	1	149	0	0	FALSE	-	2-3-0-0-0		Hex-(Hex-)Hex-HexNAc-HexNAc+Hex
					1651	1650	1095.46	1094.96	2	2187.9	22.86	1042.81	-	-	No	0	1	38.2	0.07	0	FALSE	-	2-4-0-0-0		Hex-Hex-(Hex-)Hex-HexNAc-HexNAc+Hex	Hex-(Hex-Hex-)Hex-HexNAc-HexNAc+Hex
					1653	1650	995.461	994.956	2	1987.9	22.88	612.635	-	-	No	0	1	119.49	0	0	FALSE	-	2-3-0-0-0		Hex-(Hex-)Hex-HexNAc-HexNAc+Hex
					1655	1650	948.511	948.511	2	1895.01	22.89	1149.7	-	-	No	0	1	102.91	0	0	FALSE	-	2-3-0-0-0		Hex-(Hex-)Hex-HexNAc-HexNAc+Hex
					1657	1650	968.404	967.905	2	1933.8	22.9	931.459	-	-	No	0	1	145.25	0	0	FALSE	-	2-3-1-0-0		Hex-(Hex-)Hex-HexNAc-(DeHex-)HexNAc+Hex	Hex-(Hex-)Hex-HexNAc-HexNAc+Hex
					1659	1650	875.422	875.422	2	1748.83	22.91	839.521	-	-	No	0	1	8.82	0	0	FALSE	-	2-3-0-0-0		Hex-(Hex-)Hex-HexNAc-HexNAc+Hex
					1662	1661	656.232	656.232	3	1965.67	22.93	553.286	-	-	No	0	1	101.56	0	0	FALSE	-	2-3-0-0-0		Hex-(Hex-)Hex-HexNAc-HexNAc+Hex
					1664	1661	905.437	905.437	2	1808.86	22.94	786.009	-	-	No	0	1	92.76	0	0	FALSE	-	2-3-0-0-0		Hex-(Hex-)Hex-HexNAc-HexNAc+Hex
					1666	1661	941.67	941.169	4	3760.65	22.96	708.99	-	-	No	0	1	32.16	194.57	0	FALSE	-	3-5-2-0-0		Hex-Hex-Hex-(DeHex-HexNAc-Hex-)Hex-HexNAc-(DeHex-)HexNAc+Hex	DeHex-HexNAc-Hex-Hex-Hex-(Hex-)Hex-HexNAc-(DeHex-)HexNAc+Hex
					1668	1661	976.435	975.927	2	1949.84	22.97	883.273	-	-	No	0	1	92.78	0	0	FALSE	-	2-3-0-0-0		Hex-(Hex-)Hex-HexNAc-HexNAc+Hex	Hex-(Hex-)Hex-HexNAc-(DeHex-)HexNAc+Hex
					1670	1661	920.892	920.892	2	1839.77	22.98	717.326	-	-	No	0	1	113.08	0	0	FALSE	-	2-3-1-0-0		Hex-(Hex-)Hex-HexNAc-(DeHex-)HexNAc+Hex	Hex-(Hex-)Hex-HexNAc-HexNAc+Hex
					1673	1672	816.683	816.349	3	2446.03	23	877.738	-	-	No	0	1	144.1	0	0	FALSE	-	2-3-1-0-0		Hex-(Hex-)Hex-HexNAc-(DeHex-)HexNAc+Hex	Hex-(Hex-)Hex-HexNAc-HexNAc+Hex
					1675	1672	665.994	665.994	3	1994.96	23.01	631.319	-	-	No	0	1	101.33	0	0	FALSE	-	2-3-0-0-0		Hex-(Hex-)Hex-HexNAc-HexNAc+Hex
					1677	1672	734.298	734.298	3	2199.87	23.02	682.024	-	-	No	0	1	104.29	0	0	FALSE	-	2-3-0-0-0		Hex-(Hex-)Hex-HexNAc-HexNAc+Hex
					1679	1672	1109.45	1109.45	2	2216.88	23.03	683.508	-	-	No	0	1	109.54	0	-1	TRUE	-	2-4-0-0-0	0-1-0-0-0	Hex-(Hex-)Hex-HexNAc-HexNAc+HexNAc1
					1681	1672	846.351	846.351	2	1690.69	23.04	708.99	-	-	No	0	1	89.12	0	0	FALSE	-	2-3-1-0-0		Hex-(Hex-)Hex-HexNAc-(DeHex-)HexNAc+Hex
					1684	1683	1034.16	1033.82	3	3098.44	23.06	1016.53	-	-	No	0	1	124.31	0	0	FALSE	-	2-3-0-0-0		Hex-(Hex-)Hex-HexNAc-HexNAc+Hex
					1686	1683	806.014	805.681	3	2414.02	23.08	989.331	-	-	No	0	1	116.82	0	0	FALSE	-	2-3-0-0-0		Hex-(Hex-)Hex-HexNAc-HexNAc+Hex	Hex-(Hex-)Hex-HexNAc-(DeHex-)HexNAc+Hex
					1688	1683	1030.96	1030.46	2	2058.91	23.09	681.351	-	-	No	0	1	109.06	0	0	FALSE	-	2-3-0-0-0		Hex-(Hex-)Hex-HexNAc-HexNAc+Hex
					1690	1683	769.34	769.009	3	2304.01	23.1	470.973	-	-	No	0	1	101.68	3	0	FALSE	-	3-5-0-0-0		Hex-HexNAc-Hex-(Hex-Hex-)Hex-HexNAc-HexNAc+Hex	HexNAc-(Hex-)Hex-(Hex-Hex-)Hex-HexNAc-HexNAc+Hex	HexNAc-(Hex-Hex-)Hex-(Hex-)Hex-HexNAc-HexNAc+Hex	Hex-HexNAc-(Hex-)Hex-(Hex-)Hex-HexNAc-HexNAc+Hex	HexNAc-Hex-(Hex-Hex-Hex-)Hex-HexNAc-HexNAc+Hex	HexNAc-Hex-(Hex-(Hex-)Hex-)Hex-HexNAc-HexNAc+Hex
					1692	1683	850.676	850.009	3	2547.01	23.11	750.302	-	-	No	0	1	105.11	0	0	FALSE	-	2-3-0-0-0		Hex-(Hex-)Hex-HexNAc-HexNAc+Hex
					1695	1694	821.341	821.341	2	1640.67	23.13	769.209	-	-	No	0	1	100.56	0	0	FALSE	-	2-3-0-0-0		Hex-(Hex-)Hex-HexNAc-HexNAc+Hex
					1699	1694	954.883	954.883	2	1907.75	23.15	902.739	-	-	No	0	1	100.43	0	0	FALSE	-	2-3-1-0-0		Hex-(Hex-)Hex-HexNAc-(DeHex-)HexNAc+Hex
					1701	1694	980.424	980.424	2	1958.83	23.16	805.902	-	-	No	0	1	114.18	0	0	FALSE	-	2-3-1-0-0		Hex-(Hex-)Hex-HexNAc-(DeHex-)HexNAc+Hex	Hex-(Hex-)Hex-HexNAc-HexNAc+Hex
					1703	1694	846.425	846.425	2	1690.84	23.17	793.365	-	-	No	0	1	53.19	0	0	FALSE	-	2-3-0-0-0		Hex-(Hex-)Hex-HexNAc-HexNAc+Hex
					1706	1705	829.32	829.32	3	2484.94	23.19	794.665	-	-	No	0	1	100.7	0	0	FALSE	-	2-3-1-0-0		Hex-(Hex-)Hex-HexNAc-(DeHex-)HexNAc+Hex
					1710	1705	1046.44	1045.93	2	2089.86	23.22	960.283	-	-	No	0	1	114.93	0	0	FALSE	-	2-3-0-0-0		Hex-(Hex-)Hex-HexNAc-HexNAc+Hex
					1712	1705	786.834	786.326	2	1570.64	23.23	762.198	-	-	No	0	1	102.79	0	0	FALSE	-	2-3-1-0-0		Hex-(Hex-)Hex-HexNAc-(DeHex-)HexNAc+Hex	Hex-(Hex-)Hex-HexNAc-HexNAc+Hex
					1714	1705	1087.46	1086.95	2	2171.88	23.24	805.902	-	-	No	0	1	2.71	0	0	FALSE	-	2-3-1-0-0		Hex-(Hex-)Hex-HexNAc-(DeHex-)HexNAc+Hex	Hex-(Hex-)Hex-HexNAc-HexNAc+Hex
					1717	1716	772.872	772.375	2	1542.73	23.26	737.752	-	-	No	0	1	102.16	0	0	FALSE	-	2-3-0-0-0		Hex-(Hex-)Hex-HexNAc-HexNAc+Hex
					1719	1716	659.045	658.795	4	2631.15	23.27	624.041	-	-	No	0	1	114.69	0	0	FALSE	-	2-3-0-0-0		Hex-(Hex-)Hex-HexNAc-HexNAc+Hex	Hex-(Hex-)Hex-HexNAc-(DeHex-)HexNAc+Hex
					1721	1716	655.864	655.864	2	1309.71	23.28	621.212	-	-	No	0	1	109.35	0	0	FALSE	-	2-3-0-0-0		Hex-(Hex-)Hex-HexNAc-HexNAc+Hex
					1723	1716	897.451	897.451	2	1792.89	23.29	610.589	-	-	No	0	1	102.45	0	0	FALSE	-	2-3-0-0-0		Hex-(Hex-)Hex-HexNAc-HexNAc+Hex	Hex-(Hex-)Hex-HexNAc-(DeHex-)HexNAc+Hex
					1725	1716	1474.71	1473.7	2	2945.39	23.3	1456.09	-	-	No	0	1	103.22	0	0	FALSE	-	2-3-0-0-0		Hex-(Hex-)Hex-HexNAc-HexNAc+Hex
					1728	1727	741.354	741.021	3	2220.04	23.32	750.302	-	-	No	0	1	104.81	0	0	FALSE	-	2-3-0-0-0		Hex-(Hex-)Hex-HexNAc-HexNAc+Hex
					1730	1727	700.829	699.828	2	1397.64	23.34	648.598	-	-	No	0	1	100.74	0	0	FALSE	-	2-3-0-0-0		Hex-(Hex-)Hex-HexNAc-HexNAc+Hex
					1732	1727	895.703	895.366	3	2683.08	23.35	783.769	-	-	No	0	1	124.38	1.73	0	FALSE	-	2-4-0-0-0		Hex-(Hex-Hex-)Hex-HexNAc-HexNAc+Hex	Hex-Hex-(Hex-)Hex-HexNAc-HexNAc+Hex
					1734	1727	1092.43	1092.1	3	3273.28	23.36	1131.38	-	-	No	0	0.85	136.9	2.83	-1	TRUE	-	2-5-0-0-0	0-1-0-0-0	Hex-Hex-(Hex-)Hex-HexNAc-HexNAc+HexNAc1	Hex-(Hex-Hex-)Hex-HexNAc-HexNAc+HexNAc1
					1739	1738	1189.45	1188.95	2	2375.89	23.39	1121.69	-	-	No	0	1	116.04	0	0	FALSE	-	2-3-0-0-0		Hex-(Hex-)Hex-HexNAc-HexNAc+Hex
					1741	1738	1070.81	1070.47	3	3208.39	23.4	803.316	-	-	No	0	1	209.7	101.47	0	FALSE	-	3-7-0-0-0		HexNAc-Hex-Hex-Hex-(Hex-Hex-Hex-)Hex-HexNAc-HexNAc+Hex	Hex-Hex-Hex-Hex-Hex-(HexNAc-Hex-)Hex-HexNAc-HexNAc+Hex	HexNAc-Hex-Hex-Hex-Hex-Hex-(Hex-)Hex-HexNAc-HexNAc+Hex	Hex-Hex-Hex-(HexNAc-Hex-Hex-Hex-)Hex-HexNAc-HexNAc+Hex
					1743	1738	839.354	838.354	3	2512.04	23.41	787.23	-	-	No	0	1	113.11	0	0	FALSE	-	2-3-0-0-0		Hex-(Hex-)Hex-HexNAc-HexNAc+Hex
					1745	1738	877.422	877.422	2	1752.83	23.42	823.934	-	-	No	0	1	103.44	0	0	FALSE	-	2-3-0-0-0		Hex-(Hex-)Hex-HexNAc-HexNAc+Hex
					1747	1738	917.951	916.957	2	1831.9	23.44	600.631	-	-	No	0	1	70.15	0	0	FALSE	-	2-3-0-0-0		Hex-(Hex-)Hex-HexNAc-HexNAc+Hex	Hex-(Hex-)Hex-HexNAc-(DeHex-)HexNAc+Hex
					1750	1749	882.682	882.347	3	2644.02	23.46	745.709	-	-	No	0	1	100.18	0	0	FALSE	-	2-3-0-0-0		Hex-(Hex-)Hex-HexNAc-HexNAc+Hex
					1752	1749	791.082	790.581	4	3158.29	23.47	380.702	-	-	No	0	0.88	0.36	101.46	0	FALSE	-	3-6-1-0-0		Hex-Hex-Hex-(Hex-HexNAc-Hex-)Hex-HexNAc-(DeHex-)HexNAc+Hex	Hex-(Hex-Hex-)Hex-(HexNAc-Hex-)Hex-HexNAc-(DeHex-)HexNAc+Hex	Hex-HexNAc-(Hex-)Hex-(Hex-Hex-)Hex-HexNAc-(DeHex-)HexNAc+Hex	Hex-HexNAc-Hex-(Hex-Hex-Hex-)Hex-HexNAc-(DeHex-)HexNAc+Hex	Hex-Hex-Hex-Hex-(HexNAc-Hex-)Hex-HexNAc-(DeHex-)HexNAc+Hex	Hex-(Hex-)Hex-(Hex-HexNAc-Hex-)Hex-HexNAc-(DeHex-)HexNAc+Hex	Hex-Hex-Hex-(HexNAc-(Hex-)Hex-)Hex-HexNAc-(DeHex-)HexNAc+Hex	Hex-Hex-(Hex-)Hex-(HexNAc-Hex-)Hex-HexNAc-(DeHex-)HexNAc+Hex	HexNAc-(Hex-Hex-)Hex-(Hex-Hex-)Hex-HexNAc-(DeHex-)HexNAc+Hex	Hex-HexNAc-Hex-(Hex-(Hex-)Hex-)Hex-HexNAc-(DeHex-)HexNAc+Hex	HexNAc-(Hex-)Hex-(Hex-Hex-Hex-)Hex-HexNAc-(DeHex-)HexNAc+Hex	Hex-(Hex-)Hex-(HexNAc-(Hex-)Hex-)Hex-HexNAc-(DeHex-)HexNAc+Hex	HexNAc-(Hex-)Hex-(Hex-(Hex-)Hex-)Hex-HexNAc-(DeHex-)HexNAc+Hex
					1754	1749	674.668	674.331	3	2019.97	23.48	620.052	-	-	No	0	1	109.65	0	0	FALSE	-	2-3-0-0-0		Hex-(Hex-)Hex-HexNAc-HexNAc+Hex
					1756	1749	829.336	828.844	2	1655.67	23.49	794.648	-	-	No	0	1	107.31	0	0	FALSE	-	2-3-0-0-0		Hex-(Hex-)Hex-HexNAc-HexNAc+Hex
					1758	1749	929.43	929.43	2	1856.85	23.5	829.741	-	-	No	0	1	105.61	0	0	FALSE	-	2-3-0-0-0		Hex-(Hex-)Hex-HexNAc-HexNAc+Hex
					1761	1760	1081.85	1081.18	3	3240.52	23.52	861.243	-	-	No	0	1	158.32	44.52	0	FALSE	-	3-6-0-0-0		Hex-Hex-Hex-Hex-(HexNAc-Hex-)Hex-HexNAc-HexNAc+Hex	Hex-Hex-Hex-(Hex-HexNAc-Hex-)Hex-HexNAc-HexNAc+Hex	Hex-Hex-(Hex-)Hex-(HexNAc-Hex-)Hex-HexNAc-HexNAc+Hex	HexNAc-Hex-Hex-Hex-(Hex-Hex-)Hex-HexNAc-HexNAc+Hex	Hex-HexNAc-Hex-Hex-Hex-(Hex-)Hex-HexNAc-HexNAc+Hex	Hex-Hex-Hex-(HexNAc-(Hex-)Hex-)Hex-HexNAc-HexNAc+Hex	HexNAc-Hex-Hex-(Hex-)Hex-(Hex-)Hex-HexNAc-HexNAc+Hex
					1763	1760	1343.04	1342.55	2	2683.07	23.53	783.687	-	-	No	0	1	31.77	131.91	0	FALSE	-	2-5-0-0-0		Hex-Hex-Hex-(Hex-)Hex-HexNAc-HexNAc+Hex	Hex-Hex-(Hex-Hex-)Hex-HexNAc-HexNAc+Hex
					1765	1760	852.428	852.428	2	1702.84	23.54	820.803	-	-	No	0	1	104.62	0	0	FALSE	-	2-3-0-0-0		Hex-(Hex-)Hex-HexNAc-HexNAc+Hex	Hex-(Hex-)Hex-HexNAc-(DeHex-)HexNAc+Hex
					1767	1760	945.43	945.097	3	2832.27	23.56	878.457	-	-	No	0	1	100.78	0	0	FALSE	-	2-3-1-0-0		Hex-(Hex-)Hex-HexNAc-(DeHex-)HexNAc+Hex	Hex-(Hex-)Hex-HexNAc-HexNAc+Hex
					1769	1760	860.695	860.695	3	2579.06	23.57	481.481	-	-	No	0	1	107.66	0	0	FALSE	-	2-3-0-0-0		Hex-(Hex-)Hex-HexNAc-HexNAc+Hex
					1772	1771	753.54	753.139	5	3760.66	23.59	448.885	-	-	No	0	1	1.2	126.92	0	FALSE	-	3-4-2-0-0		Hex-Hex-(DeHex-HexNAc-Hex-)Hex-HexNAc-(DeHex-)HexNAc+Hex
					1774	1771	668.558	668.558	4	2670.2	23.6	342.911	-	-	No	0	0.95	3.75	220.47	0	FALSE	-	2-7-1-0-0		Hex-Hex-Hex-Hex-Hex-(Hex-)Hex-HexNAc-(DeHex-)HexNAc+Hex	Hex-Hex-Hex-Hex-(Hex-Hex-)Hex-HexNAc-(DeHex-)HexNAc+Hex	Hex-Hex-Hex-(Hex-Hex-Hex-)Hex-HexNAc-(DeHex-)HexNAc+Hex
					1776	1771	1546.63	1546.12	2	3090.24	23.61	1120.38	-	-	No	0	1	276.24	0	0	FALSE	-	2-3-1-0-0		Hex-(Hex-)Hex-HexNAc-(DeHex-)HexNAc+Hex
					1778	1771	923.444	922.938	2	1843.86	23.62	870.907	-	-	No	0	1	118.98	0	0	FALSE	-	2-3-0-0-0		Hex-(Hex-)Hex-HexNAc-HexNAc+Hex
					1783	1782	737.604	737.351	4	2945.38	23.66	400.157	-	-	No	0	0.97	1.15	111.69	0	FALSE	-	5-3-0-0-0		HexNAc-(HexNAc-)Hex-(HexNAc-Hex-)Hex-HexNAc-HexNAc+Hex	HexNAc-Hex-(HexNAc-(HexNAc-)Hex-)Hex-HexNAc-HexNAc+Hex
					1785	1782	687.344	687.009	3	2058	23.67	441.227	-	-	No	0	1	102.12	0	0	FALSE	-	2-3-1-0-0		Hex-(Hex-)Hex-HexNAc-(DeHex-)HexNAc+Hex	Hex-(Hex-)Hex-HexNAc-HexNAc+Hex
					1787	1782	726.336	726.336	3	2175.99	23.68	515.579	-	-	No	0	1	100.74	0	0	FALSE	-	2-3-0-0-0		Hex-(Hex-)Hex-HexNAc-HexNAc+Hex
					1789	1782	812.361	811.865	2	1621.71	23.69	777.634	-	-	No	0	1	102.81	0	0	FALSE	-	2-3-0-0-0		Hex-(Hex-)Hex-HexNAc-HexNAc+Hex
					1794	1793	716.371	716.371	2	1430.73	23.72	707.25	-	-	No	0	1	182.72	0	0	FALSE	-	2-3-0-0-0		Hex-(Hex-)Hex-HexNAc-HexNAc+Hex
					1796	1793	719.324	718.992	3	2153.95	23.73	328.166	-	-	No	0	1	2.39	150.67	0	FALSE	-	2-5-0-0-0		Hex-Hex-Hex-(Hex-)Hex-HexNAc-HexNAc+Hex	Hex-Hex-(Hex-Hex-)Hex-HexNAc-HexNAc+Hex
					1798	1793	832.928	832.928	2	1663.84	23.74	780.721	-	-	No	0	1	100.42	0	0	FALSE	-	2-3-0-0-0		Hex-(Hex-)Hex-HexNAc-HexNAc+Hex
					1800	1793	901.019	900.681	3	2699.02	23.75	509.919	-	-	No	0	1	6.74	115.56	0	FALSE	-	4-3-3-0-0		DeHex-HexNAc-(DeHex-HexNAc-)Hex-(Hex-)Hex-HexNAc-(DeHex-)HexNAc+Hex	DeHex-HexNAc-Hex-(DeHex-HexNAc-Hex-)Hex-HexNAc-(DeHex-)HexNAc+Hex
					1802	1793	788.39	788.39	2	1574.77	23.76	573.266	-	-	No	0	1	121.5	0	0	FALSE	-	2-3-0-0-0		Hex-(Hex-)Hex-HexNAc-HexNAc+Hex
					1805	1804	714.842	714.842	2	1427.67	23.78	705.764	-	-	No	0	1	127.6	0	0	FALSE	-	2-3-0-0-0		Hex-(Hex-)Hex-HexNAc-HexNAc+Hex
					1807	1804	1508.63	1508.13	2	3014.25	23.8	1456.06	-	-	No	0	1	100.11	0	0	FALSE	-	2-3-0-0-0		Hex-(Hex-)Hex-HexNAc-HexNAc+Hex
					1809	1804	1117.99	1117.49	2	2232.97	23.8	780.705	-	-	No	0	1	113.4	0	0	FALSE	-	2-3-1-0-0		Hex-(Hex-)Hex-HexNAc-(DeHex-)HexNAc+Hex	Hex-(Hex-)Hex-HexNAc-HexNAc+Hex
					1811	1804	651.342	651.014	3	1950.02	23.82	616.372	-	-	No	0	1	108.35	0	0	FALSE	-	2-3-0-0-0		Hex-(Hex-)Hex-HexNAc-HexNAc+Hex	Hex-(Hex-)Hex-HexNAc-(DeHex-)HexNAc+Hex
					1813	1804	1350.52	1350.52	2	2699.02	23.83	713.531	-	-	No	0	1	4.14	110.01	0	FALSE	-	2-5-1-0-0		Hex-Hex-Hex-(Hex-)Hex-HexNAc-(DeHex-)HexNAc+Hex	Hex-Hex-(Hex-Hex-)Hex-HexNAc-(DeHex-)HexNAc+Hex
					1816	1815	1013.42	1013.08	3	3036.23	23.84	553.286	-	-	No	0	0.98	0.29	100.3	0	FALSE	-	2-5-0-0-0		Hex-Hex-(Hex-Hex-)Hex-HexNAc-HexNAc+Hex	Hex-Hex-Hex-(Hex-)Hex-HexNAc-HexNAc+Hex
					1818	1815	802.972	802.637	3	2404.89	23.86	520.786	-	-	No	0	1	109.33	0	0	FALSE	-	2-3-1-0-0		Hex-(Hex-)Hex-HexNAc-(DeHex-)HexNAc+Hex	Hex-(Hex-)Hex-HexNAc-HexNAc+Hex
					1820	1815	776.36	775.857	2	1549.7	23.87	459.503	-	-	No	0	1	104.69	0	0	FALSE	-	2-3-0-0-0		Hex-(Hex-)Hex-HexNAc-HexNAc+Hex
					1822	1815	1158.07	1157.57	2	2313.13	23.88	1043.4	-	-	No	0	1	100.81	0	0	FALSE	-	2-3-0-0-0		Hex-(Hex-)Hex-HexNAc-HexNAc+Hex
					1829	1826	706.326	706.326	3	2115.96	23.92	808.707	-	-	No	0	1	111.6	0	0	FALSE	-	2-3-1-0-0		Hex-(Hex-)Hex-HexNAc-(DeHex-)HexNAc+Hex
					1831	1826	841.907	841.405	2	1680.8	23.93	789.227	-	-	No	0	1	100.98	0	0	FALSE	-	2-3-0-0-0		Hex-(Hex-)Hex-HexNAc-HexNAc+Hex
					1833	1826	996.924	996.924	2	1991.83	23.94	681.351	-	-	No	0	1	100.33	0	0	FALSE	-	2-3-0-0-0		Hex-(Hex-)Hex-HexNAc-HexNAc+Hex
					1835	1826	963.933	963.435	2	1924.86	23.95	567.801	-	-	No	0	1	22.48	0	0	FALSE	-	2-3-0-0-0		Hex-(Hex-)Hex-HexNAc-HexNAc+Hex	Hex-(Hex-)Hex-HexNAc-(DeHex-)HexNAc+Hex
					1838	1837	745.664	745.329	3	2232.97	23.97	302.14	-	-	No	0	1	11.36	121.14	0	FALSE	-	4-4-1-0-0		DeHex-HexNAc-(HexNAc-)Hex-(Hex-Hex-)Hex-HexNAc-HexNAc+Hex	DeHex-HexNAc-Hex-(Hex-(HexNAc-)Hex-)Hex-HexNAc-HexNAc+Hex
					1840	1837	683.339	683.003	3	2045.99	23.98	441.227	-	-	No	0	1	147.18	0	0	FALSE	-	2-3-1-0-0		Hex-(Hex-)Hex-HexNAc-(DeHex-)HexNAc+Hex
					1842	1837	808.034	807.372	3	2419.09	23.99	589.759	-	-	No	0	1	133.07	0.47	-1	TRUE	-	4-3-1-0-0	0-0-1-0-0	HexNAc-(HexNAc-)Hex-(Hex-)Hex-HexNAc-HexNAc+DeHex1	HexNAc-Hex-(HexNAc-Hex-)Hex-HexNAc-HexNAc+DeHex1
					1844	1837	1100.53	1100.19	3	3297.55	24	1167.45	-	-	No	0	1	116.19	0	0	FALSE	-	2-3-0-0-0		Hex-(Hex-)Hex-HexNAc-HexNAc+Hex
					1846	1837	1378.06	1377.56	2	2753.11	24.01	1424.85	-	-	No	0	0.76	176.81	0	-2	TRUE	-	3-3-1-1-0	1-0-0-1-0	Hex-(Hex-)Hex-HexNAc-(DeHex-)HexNAc+Hex1NeuAc1
					1849	1848	662.651	661.989	3	1982.95	24.03	813.736	-	-	No	0	1	103.75	0	0	FALSE	-	2-3-0-0-0		Hex-(Hex-)Hex-HexNAc-HexNAc+Hex
					1851	1848	697.339	697.088	4	2784.32	24.04	556.927	-	-	No	0	1	122.8	0	0	FALSE	-	2-3-1-0-0		Hex-(Hex-)Hex-HexNAc-(DeHex-)HexNAc+Hex
					1853	1848	1043.48	1042.98	2	2083.95	24.05	1192.75	-	-	No	1	0.81	203.78	0	-1	TRUE	-	3-3-0-0-0	1-0-0-0-0	Hex-(Hex-)Hex-HexNAc-HexNAc+Hex1
					1855	1848	825.641	825.394	4	3297.55	24.06	771.732	-	-	No	0	1	116.94	0	0	FALSE	-	2-3-0-0-0		Hex-(Hex-)Hex-HexNAc-HexNAc+Hex	Hex-(Hex-)Hex-HexNAc-(DeHex-)HexNAc+Hex
					1857	1848	781.655	781.315	3	2340.92	24.07	769.697	-	-	No	0	1	107.14	0	0	FALSE	-	2-3-1-0-0		Hex-(Hex-)Hex-HexNAc-(DeHex-)HexNAc+Hex	Hex-(Hex-)Hex-HexNAc-HexNAc+Hex
					1860	1859	670.288	669.955	3	2006.84	24.09	635.329	-	-	No	0	1	100.45	0	0	FALSE	-	2-3-0-0-0		Hex-(Hex-)Hex-HexNAc-HexNAc+Hex
					1862	1859	690.021	690.021	3	2067.04	24.11	654.675	-	-	No	0	1	105.13	0	0	FALSE	-	2-3-0-0-0		Hex-(Hex-)Hex-HexNAc-HexNAc+Hex
					1864	1859	818.347	818.347	2	1634.68	24.12	782.884	-	-	No	0	1	7.22	0	0	FALSE	-	2-3-0-0-0		Hex-(Hex-)Hex-HexNAc-HexNAc+Hex
					1866	1859	831.14	830.89	4	3319.53	24.13	672.824	-	-	No	0	1	46.22	102.02	0	FALSE	-	4-3-0-0-0		HexNAc-Hex-(HexNAc-Hex-)Hex-HexNAc-HexNAc+Hex	HexNAc-(HexNAc-)Hex-(Hex-)Hex-HexNAc-HexNAc+Hex
					1868	1859	848.388	848.388	3	2542.14	24.14	944.378	-	-	No	0	1	243.68	0	0	FALSE	-	2-3-0-0-0		Hex-(Hex-)Hex-HexNAc-HexNAc+Hex
					1871	1870	709.323	708.821	4	2831.26	24.16	528.23	-	-	No	0	0.88	101.22	0	0	FALSE	-	2-3-1-0-0		Hex-(Hex-)Hex-HexNAc-(DeHex-)HexNAc+Hex	Hex-(Hex-)Hex-HexNAc-HexNAc+Hex
					1873	1870	703.314	702.982	3	2105.92	24.17	691.439	-	-	No	0	1	216.45	0	0	FALSE	-	2-3-0-0-0		Hex-(Hex-)Hex-HexNAc-HexNAc+Hex	Hex-(Hex-)Hex-HexNAc-(DeHex-)HexNAc+Hex
					1875	1870	993.474	992.972	2	1983.93	24.18	975.298	-	-	No	0	1	105.26	0	0	FALSE	-	2-3-0-0-0		Hex-(Hex-)Hex-HexNAc-HexNAc+Hex
					1877	1870	1069.08	1068.74	3	3203.2	24.19	589.759	-	-	No	0	1	9.2	154.2	0	FALSE	-	3-9-0-0-0		Hex-HexNAc-(Hex-Hex-)Hex-(Hex-(Hex-Hex-)Hex-)Hex-HexNAc-HexNAc+Hex	Hex-Hex-Hex-(HexNAc-)Hex-(Hex-(Hex-Hex-)Hex-)Hex-HexNAc-HexNAc+Hex	Hex-Hex-Hex-Hex-Hex-(HexNAc-)Hex-(Hex-Hex-)Hex-HexNAc-HexNAc+Hex	Hex-Hex-Hex-Hex-(Hex-HexNAc-)Hex-(Hex-Hex-)Hex-HexNAc-HexNAc+Hex	Hex-Hex-(Hex-HexNAc-)Hex-(Hex-(Hex-Hex-)Hex-)Hex-HexNAc-HexNAc+Hex	Hex-Hex-Hex-(Hex-HexNAc-)Hex-(Hex-(Hex-)Hex-)Hex-HexNAc-HexNAc+Hex	Hex-Hex-Hex-Hex-(HexNAc-)Hex-(Hex-(Hex-)Hex-)Hex-HexNAc-HexNAc+Hex	Hex-HexNAc-(Hex-Hex-Hex-)Hex-(Hex-(Hex-)Hex-)Hex-HexNAc-HexNAc+Hex
					1879	1870	914.926	914.926	2	1827.84	24.21	861.883	-	-	No	0	1	109.1	0	0	FALSE	-	2-3-0-0-0		Hex-(Hex-)Hex-HexNAc-HexNAc+Hex
					1882	1881	679.622	679.622	3	2035.84	24.23	523.227	-	-	No	0	1	102.67	0	0	FALSE	-	2-3-0-0-0		Hex-(Hex-)Hex-HexNAc-HexNAc+Hex	Hex-(Hex-)Hex-HexNAc-(DeHex-)HexNAc+Hex
					1884	1881	998.992	998.493	2	1994.97	24.24	946.411	-	-	No	0	1	100.11	0	0	FALSE	-	2-3-0-0-0		Hex-(Hex-)Hex-HexNAc-HexNAc+Hex
					1886	1881	858.932	858.431	2	1714.85	24.25	840.841	-	-	No	0	1	144.58	0	0	FALSE	-	2-3-1-0-0		Hex-(Hex-)Hex-HexNAc-(DeHex-)HexNAc+Hex
					1888	1881	1272.58	1272.08	2	2542.14	24.26	944.346	-	-	No	0	1	168.25	0	0	FALSE	-	2-3-0-0-0		Hex-(Hex-)Hex-HexNAc-HexNAc+Hex	Hex-(Hex-)Hex-HexNAc-(DeHex-)HexNAc+Hex
					1890	1881	971.736	971.736	3	2912.18	24.27	600.631	-	-	No	0	1	8.03	152.05	0	FALSE	-	4-4-2-0-0		DeHex-HexNAc-(HexNAc-)Hex-(Hex-Hex-)Hex-HexNAc-(DeHex-)HexNAc+Hex	DeHex-HexNAc-(Hex-)Hex-(HexNAc-Hex-)Hex-HexNAc-(DeHex-)HexNAc+Hex	DeHex-HexNAc-Hex-(Hex-(HexNAc-)Hex-)Hex-HexNAc-(DeHex-)HexNAc+Hex
					1893	1892	652.538	652.292	4	2605.14	24.29	340.491	-	-	No	0	1	3.38	151.63	0	FALSE	-	3-4-1-0-0		HexNAc-(Hex-)Hex-(Hex-)Hex-HexNAc-(DeHex-)HexNAc+Hex	Hex-HexNAc-Hex-(Hex-)Hex-HexNAc-(DeHex-)HexNAc+Hex	HexNAc-Hex-(Hex-Hex-)Hex-HexNAc-(DeHex-)HexNAc+Hex
					1895	1892	1004.43	1004.43	2	2006.84	24.3	587.292	-	-	No	0	1	100.39	0	0	FALSE	-	2-3-0-0-0		Hex-(Hex-)Hex-HexNAc-HexNAc+Hex
					1897	1892	1174.47	1173.97	2	2345.92	24.31	812.854	-	-	No	0	1	105.94	0	0	FALSE	-	2-3-0-0-0		Hex-(Hex-)Hex-HexNAc-HexNAc+Hex	Hex-(Hex-)Hex-HexNAc-(DeHex-)HexNAc+Hex
					1899	1892	1009.46	1009.13	3	3024.36	24.33	815.644	-	-	No	0	1	109.22	0	0	FALSE	-	2-3-1-0-0		Hex-(Hex-)Hex-HexNAc-(DeHex-)HexNAc+Hex	Hex-(Hex-)Hex-HexNAc-HexNAc+Hex
					1901	1892	1058.5	1058.5	2	2114.99	24.34	1172.65	-	-	No	0	1	101.89	0	0	FALSE	-	2-3-0-0-0		Hex-(Hex-)Hex-HexNAc-HexNAc+Hex
					1904	1903	854.409	854.075	3	2559.2	24.36	641.55	-	-	No	0	1	124.62	0	0	FALSE	-	2-3-0-0-0		Hex-(Hex-)Hex-HexNAc-HexNAc+Hex	Hex-(Hex-)Hex-HexNAc-(DeHex-)HexNAc+Hex
					1906	1903	870.046	869.378	3	2605.11	24.37	858.484	-	-	No	1	0.96	168.06	0.88	0	FALSE	-	2-4-0-0-0		Hex-Hex-(Hex-)Hex-HexNAc-HexNAc+Hex	Hex-(Hex-Hex-)Hex-HexNAc-HexNAc+Hex
					1908	1903	909.943	909.943	2	1817.87	24.38	857.679	-	-	No	0	1	101.68	0	0	FALSE	-	2-3-0-0-0		Hex-(Hex-)Hex-HexNAc-HexNAc+Hex
					1910	1903	984.965	984.965	2	1967.91	24.39	507.267	-	-	No	0	1	0.95	100	0	FALSE	-	2-4-0-0-0		Hex-(Hex-Hex-)Hex-HexNAc-HexNAc+Hex	Hex-Hex-(Hex-)Hex-HexNAc-HexNAc+Hex
					1912	1903	1347.09	1346.59	2	2691.16	24.4	1281.45	-	-	No	0	0.93	125.1	0	0	FALSE	-	2-3-0-0-0		Hex-(Hex-)Hex-HexNAc-HexNAc+Hex
					1915	1914	692.003	692.003	3	2072.99	24.43	448.885	-	-	No	0	1	137.09	0	0	FALSE	-	2-3-1-0-0		Hex-(Hex-)Hex-HexNAc-(DeHex-)HexNAc+Hex	Hex-(Hex-)Hex-HexNAc-HexNAc+Hex
					1917	1914	892.013	891.678	3	2672.01	24.44	558.927	-	-	No	0	1	100.28	0.11	0	FALSE	-	2-4-0-0-0		Hex-Hex-(Hex-)Hex-HexNAc-HexNAc+Hex	Hex-(Hex-Hex-)Hex-HexNAc-HexNAc+Hex
					1919	1914	961.441	961.441	2	1920.87	24.45	992.667	-	-	No	0	1	44.04	0	0	FALSE	-	2-3-0-0-0		Hex-(Hex-)Hex-HexNAc-HexNAc+Hex
					1923	1914	800.399	800.058	3	2397.15	24.47	681.351	-	-	No	0	1	166.5	0	0	FALSE	-	2-3-0-0-0		Hex-(Hex-)Hex-HexNAc-HexNAc+Hex
					1926	1925	958.912	958.412	2	1914.81	24.49	878.275	-	-	No	0	1	100.46	0	0	FALSE	-	2-3-0-0-0		Hex-(Hex-)Hex-HexNAc-HexNAc+Hex
					1928	1925	942.438	942.438	2	1882.86	24.51	784.766	-	-	No	0	1	103.76	0	0	FALSE	-	2-3-0-0-0		Hex-(Hex-)Hex-HexNAc-HexNAc+Hex
					1932	1925	965.45	964.951	2	1927.89	24.53	636.171	-	-	No	0	1	148.09	0	0	FALSE	-	2-3-0-0-0		Hex-(Hex-)Hex-HexNAc-HexNAc+Hex
					1934	1925	1281.12	1280.61	2	2559.21	24.55	1736.96	-	-	No	0	1	137.34	0	0	FALSE	-	2-3-0-0-0		Hex-(Hex-)Hex-HexNAc-HexNAc+Hex
					1937	1936	666.33	665.997	3	1994.97	24.57	509.919	-	-	No	0	1	100.31	0	0	FALSE	-	2-3-1-0-0		Hex-(Hex-)Hex-HexNAc-(DeHex-)HexNAc+Hex
					1939	1936	1176.5	1176.5	2	2350.98	24.58	265.142	-	-	No	0	1	18.68	217.62	0	FALSE	-	2-9-0-0-0		Hex-Hex-Hex-Hex-(Hex-Hex-Hex-Hex-)Hex-HexNAc-HexNAc+Hex	Hex-Hex-Hex-Hex-Hex-(Hex-Hex-Hex-)Hex-HexNAc-HexNAc+Hex	Hex-Hex-Hex-Hex-Hex-Hex-(Hex-Hex-)Hex-HexNAc-HexNAc+Hex	Hex-Hex-Hex-Hex-Hex-Hex-Hex-(Hex-)Hex-HexNAc-HexNAc+Hex
					1941	1936	885.888	885.888	2	1769.76	24.59	459.728	-	-	No	0	1	20.71	0	0	FALSE	-	2-3-0-0-0		Hex-(Hex-)Hex-HexNAc-HexNAc+Hex
					1943	1936	880.408	880.408	2	1758.8	24.6	827.728	-	-	No	0	1	107.13	0	0	FALSE	-	2-3-1-0-0		Hex-(Hex-)Hex-HexNAc-(DeHex-)HexNAc+Hex	Hex-(Hex-)Hex-HexNAc-HexNAc+Hex
					1945	1936	762.864	762.864	5	3809.28	24.61	709.721	-	-	No	0	1	150.4	0	0	FALSE	-	2-3-1-0-0		Hex-(Hex-)Hex-HexNAc-(DeHex-)HexNAc+Hex	Hex-(Hex-)Hex-HexNAc-HexNAc+Hex
					1948	1947	735.342	735.342	3	2203.01	24.63	700.809	-	-	No	0	1	103.09	0	0	FALSE	-	2-3-1-0-0		Hex-(Hex-)Hex-HexNAc-(DeHex-)HexNAc+Hex	Hex-(Hex-)Hex-HexNAc-HexNAc+Hex
					1950	1947	1015.06	1014.72	3	3041.15	24.65	852.848	-	-	No	1	0.88	101.87	31.32	-1	TRUE	-	2-7-0-0-0	0-1-0-0-0	Hex-Hex-Hex-Hex-(Hex-)Hex-HexNAc-HexNAc+HexNAc1	Hex-Hex-Hex-(Hex-Hex-)Hex-HexNAc-HexNAc+HexNAc1	Hex-Hex-(Hex-Hex-Hex-)Hex-HexNAc-HexNAc+HexNAc1
					1952	1947	903.453	903.453	2	1804.89	24.66	850.775	-	-	No	0	1	111.14	0	0	FALSE	-	2-3-1-0-0		Hex-(Hex-)Hex-HexNAc-(DeHex-)HexNAc+Hex	Hex-(Hex-)Hex-HexNAc-HexNAc+Hex
					1954	1947	1386.25	1385.58	3	4153.72	24.67	828.969	-	-	No	0	0.55	3.14	141.51	0	FALSE	-	6-7-1-0-0		HexNAc-Hex-HexNAc-(DeHex-HexNAc-)Hex-(Hex-Hex-Hex-(HexNAc-)Hex-)Hex-HexNAc-HexNAc+Hex	HexNAc-Hex-HexNAc-(HexNAc-)Hex-(DeHex-HexNAc-(Hex-Hex-Hex-)Hex-)Hex-HexNAc-HexNAc+Hex	HexNAc-Hex-HexNAc-(Hex-HexNAc-)Hex-(DeHex-HexNAc-(Hex-Hex-)Hex-)Hex-HexNAc-HexNAc+Hex	Hex-HexNAc-Hex-HexNAc-(HexNAc-)Hex-(DeHex-HexNAc-(Hex-Hex-)Hex-)Hex-HexNAc-HexNAc+Hex	Hex-HexNAc-Hex-HexNAc-(Hex-HexNAc-)Hex-(DeHex-HexNAc-(Hex-)Hex-)Hex-HexNAc-HexNAc+Hex	HexNAc-Hex-HexNAc-(Hex-Hex-)Hex-(DeHex-HexNAc-(Hex-HexNAc-)Hex-)Hex-HexNAc-HexNAc+Hex	HexNAc-Hex-HexNAc-Hex-HexNAc-Hex-(DeHex-HexNAc-(Hex-Hex-)Hex-)Hex-HexNAc-HexNAc+Hex	Hex-HexNAc-Hex-HexNAc-Hex-HexNAc-(DeHex-HexNAc-)Hex-(Hex-Hex-)Hex-HexNAc-HexNAc+Hex	HexNAc-Hex-HexNAc-Hex-HexNAc-(DeHex-HexNAc-)Hex-(Hex-(Hex-)Hex-)Hex-HexNAc-HexNAc+Hex	Hex-HexNAc-Hex-HexNAc-Hex-HexNAc-(Hex-)Hex-(DeHex-HexNAc-Hex-)Hex-HexNAc-HexNAc+Hex	HexNAc-Hex-HexNAc-Hex-HexNAc-(DeHex-HexNAc-)Hex-(Hex-Hex-Hex-)Hex-HexNAc-HexNAc+Hex	Hex-HexNAc-Hex-HexNAc-(DeHex-HexNAc-)Hex-(HexNAc-(Hex-Hex-)Hex-)Hex-HexNAc-HexNAc+Hex	Hex-HexNAc-Hex-HexNAc-(DeHex-HexNAc-)Hex-(Hex-Hex-(HexNAc-)Hex-)Hex-HexNAc-HexNAc+Hex	Hex-HexNAc-Hex-HexNAc-(DeHex-HexNAc-)Hex-(Hex-(Hex-HexNAc-)Hex-)Hex-HexNAc-HexNAc+Hex	HexNAc-Hex-HexNAc-(Hex-Hex-Hex-)Hex-(DeHex-HexNAc-(HexNAc-)Hex-)Hex-HexNAc-HexNAc+Hex	HexNAc-Hex-HexNAc-(DeHex-HexNAc-)Hex-(Hex-Hex-(Hex-HexNAc-)Hex-)Hex-HexNAc-HexNAc+Hex	HexNAc-Hex-HexNAc-(DeHex-HexNAc-)Hex-(Hex-HexNAc-(Hex-Hex-)Hex-)Hex-HexNAc-HexNAc+Hex	DeHex-HexNAc-(Hex-HexNAc-)Hex-(Hex-HexNAc-Hex-HexNAc-(Hex-)Hex-)Hex-HexNAc-HexNAc+Hex	Hex-HexNAc-Hex-HexNAc-Hex-HexNAc-Hex-(DeHex-HexNAc-(Hex-)Hex-)Hex-HexNAc-HexNAc+Hex	Hex-HexNAc-Hex-HexNAc-(DeHex-HexNAc-)Hex-(Hex-HexNAc-(Hex-)Hex-)Hex-HexNAc-HexNAc+Hex	HexNAc-Hex-HexNAc-Hex-HexNAc-(Hex-Hex-)Hex-(DeHex-HexNAc-Hex-)Hex-HexNAc-HexNAc+Hex	HexNAc-Hex-HexNAc-Hex-HexNAc-(Hex-)Hex-(DeHex-HexNAc-(Hex-)Hex-)Hex-HexNAc-HexNAc+Hex	DeHex-HexNAc-(Hex-HexNAc-)Hex-(HexNAc-Hex-HexNAc-(Hex-Hex-)Hex-)Hex-HexNAc-HexNAc+Hex	Hex-HexNAc-Hex-HexNAc-(Hex-Hex-)Hex-(DeHex-HexNAc-(HexNAc-)Hex-)Hex-HexNAc-HexNAc+Hex	Hex-HexNAc-Hex-HexNAc-(Hex-)Hex-(DeHex-HexNAc-(Hex-HexNAc-)Hex-)Hex-HexNAc-HexNAc+Hex
					1956	1947	823.888	823.39	2	1644.77	24.68	567.801	-	-	No	0	1	101.11	0	0	FALSE	-	2-3-0-0-0		Hex-(Hex-)Hex-HexNAc-HexNAc+Hex
					1959	1958	727.92	727.519	5	3632.56	24.7	450.725	-	-	No	0	1	1.79	113.48	0	FALSE	-	5-4-0-1-0		NeuAc-Hex-HexNAc-Hex-(HexNAc-(HexNAc-)Hex-)Hex-HexNAc-HexNAc+Hex	NeuAc-Hex-HexNAc-(HexNAc-)Hex-(HexNAc-Hex-)Hex-HexNAc-HexNAc+Hex
					1961	1958	722.327	722.327	2	1442.64	24.71	432.53	-	-	No	0	1	102.71	0	0	FALSE	-	2-3-0-0-0		Hex-(Hex-)Hex-HexNAc-HexNAc+Hex	Hex-(Hex-)Hex-HexNAc-(DeHex-)HexNAc+Hex
					1963	1958	769.883	769.883	2	1537.75	24.72	734.557	-	-	No	0	1	118.35	0	0	FALSE	-	2-3-0-0-0		Hex-(Hex-)Hex-HexNAc-HexNAc+Hex
					1965	1958	940.913	940.913	2	1879.81	24.73	888.259	-	-	No	0	1	70.27	0	0	FALSE	-	2-3-0-0-0		Hex-(Hex-)Hex-HexNAc-HexNAc+Hex
					1967	1958	953.403	952.896	2	1903.78	24.74	934.139	-	-	No	0	1	110.4	0	0	FALSE	-	2-3-0-0-0		Hex-(Hex-)Hex-HexNAc-HexNAc+Hex
					1970	1969	1087.47	1086.97	2	2171.92	24.76	1466.57	-	-	No	0	1	102.08	0	0	FALSE	-	2-3-1-0-0		Hex-(Hex-)Hex-HexNAc-(DeHex-)HexNAc+Hex	Hex-(Hex-)Hex-HexNAc-HexNAc+Hex
					1974	1969	1039.69	1039.43	4	4153.69	24.79	756.378	-	-	No	0	0.94	100.83	5.81	0	FALSE	-	4-6-1-0-0		HexNAc-Hex-Hex-(Hex-)Hex-(HexNAc-Hex-)Hex-HexNAc-(DeHex-)HexNAc+Hex	HexNAc-Hex-Hex-Hex-(Hex-HexNAc-Hex-)Hex-HexNAc-(DeHex-)HexNAc+Hex	HexNAc-Hex-Hex-Hex-(HexNAc-(Hex-)Hex-)Hex-HexNAc-(DeHex-)HexNAc+Hex	HexNAc-Hex-HexNAc-Hex-Hex-Hex-(Hex-)Hex-HexNAc-(DeHex-)HexNAc+Hex	Hex-Hex-Hex-(HexNAc-Hex-HexNAc-Hex-)Hex-HexNAc-(DeHex-)HexNAc+Hex	Hex-HexNAc-Hex-Hex-Hex-(HexNAc-Hex-)Hex-HexNAc-(DeHex-)HexNAc+Hex
					1976	1969	765.722	765.392	3	2293.15	24.8	715.699	-	-	No	0	1	166.42	0	0	FALSE	-	2-3-0-0-0		Hex-(Hex-)Hex-HexNAc-HexNAc+Hex
					1978	1969	815.869	815.367	2	1628.72	24.81	790.56	-	-	No	0	1	103	0	0	FALSE	-	2-3-1-0-0		Hex-(Hex-)Hex-HexNAc-(DeHex-)HexNAc+Hex
					1981	1980	896.414	895.911	2	1789.81	24.83	579.289	-	-	No	0	1	118.11	0	0	FALSE	-	2-3-0-0-0		Hex-(Hex-)Hex-HexNAc-HexNAc+Hex
					1983	1980	912.4	911.899	2	1821.78	24.84	757.632	-	-	No	0	1	117.7	0	0	FALSE	-	2-3-0-0-0		Hex-(Hex-)Hex-HexNAc-HexNAc+Hex
					1985	1980	703.363	702.362	2	1402.71	24.86	668.146	-	-	No	0	1	117.09	0	0	FALSE	-	2-3-0-0-0		Hex-(Hex-)Hex-HexNAc-HexNAc+Hex
					1987	1980	1095.97	1095.47	2	2188.93	24.86	324.649	-	-	No	0	1	81.39	109.92	0	FALSE	-	2-6-0-0-0		Hex-Hex-Hex-(Hex-Hex-)Hex-HexNAc-HexNAc+Hex	Hex-Hex-(Hex-Hex-Hex-)Hex-HexNAc-HexNAc+Hex	Hex-Hex-Hex-Hex-(Hex-)Hex-HexNAc-HexNAc+Hex
					1989	1980	987.51	987.51	2	1973.01	24.88	569.969	-	-	No	0	1	105.17	0	-1	TRUE	-	2-3-1-0-0	0-0-1-0-0	Hex-(Hex-)Hex-HexNAc-HexNAc+DeHex1
					1992	1991	756.847	756.847	2	1511.68	24.9	699.666	-	-	No	0	1	127.25	0	0	FALSE	-	2-3-0-0-0		Hex-(Hex-)Hex-HexNAc-HexNAc+Hex
					1994	1991	918.95	918.95	2	1835.88	24.91	859.395	-	-	No	0	1	180.68	0	0	FALSE	-	2-3-0-0-0		Hex-(Hex-)Hex-HexNAc-HexNAc+Hex
					1996	1991	839.399	839.399	2	1676.78	24.92	786.304	-	-	No	0	1	105.49	0	0	FALSE	-	2-3-0-0-0		Hex-(Hex-)Hex-HexNAc-HexNAc+Hex
					1998	1991	771.852	771.852	2	1541.69	24.93	570.987	-	-	No	0	1	190.62	0	0	FALSE	-	2-3-0-0-0		Hex-(Hex-)Hex-HexNAc-HexNAc+Hex
					2000	1991	1247.52	1247.19	3	3738.54	24.94	648.291	-	-	No	0	0.57	8.09	258.27	0	FALSE	-	5-6-2-0-0		Hex-Hex-(DeHex-HexNAc-)Hex-(DeHex-HexNAc-Hex-HexNAc-Hex-)Hex-HexNAc-HexNAc+Hex	Hex-Hex-(DeHex-HexNAc-)Hex-(HexNAc-Hex-(DeHex-)HexNAc-Hex-)Hex-HexNAc-HexNAc+Hex
					2003	2002	671.793	671.793	2	1341.57	24.96	636.159	-	-	No	0	1	107.23	0	0	FALSE	-	2-3-0-0-0		Hex-(Hex-)Hex-HexNAc-HexNAc+Hex
					2005	2002	712.008	711.672	3	2131.99	24.97	658.71	-	-	No	0	1	107.47	0	0	FALSE	-	2-3-1-0-0		Hex-(Hex-)Hex-HexNAc-(DeHex-)HexNAc+Hex	Hex-(Hex-)Hex-HexNAc-HexNAc+Hex
					2007	2002	1212.53	1211.86	3	3632.55	24.98	911.009	-	-	No	0	0.89	113.06	5.51	0	FALSE	-	2-4-0-0-0		Hex-(Hex-Hex-)Hex-HexNAc-HexNAc+Hex	Hex-Hex-(Hex-)Hex-HexNAc-HexNAc+Hex
					2009	2002	955.841	955.841	2	1909.67	25	903.734	-	-	No	0	1	167.44	0	0	FALSE	-	2-3-1-0-0		Hex-(Hex-)Hex-HexNAc-(DeHex-)HexNAc+Hex	Hex-(Hex-)Hex-HexNAc-HexNAc+Hex
					2011	2002	929.456	929.128	3	2784.36	25.01	920.199	-	-	No	0	1	112.32	0	0	FALSE	-	2-3-1-0-0		Hex-(Hex-)Hex-HexNAc-(DeHex-)HexNAc+Hex	Hex-(Hex-)Hex-HexNAc-HexNAc+Hex
					2014	2013	784.87	784.365	2	1566.72	25.03	573.582	-	-	No	0	1	50.65	0	0	FALSE	-	2-3-0-0-0		Hex-(Hex-)Hex-HexNAc-HexNAc+Hex
					2016	2013	861.418	860.914	4	3439.63	25.04	825.938	-	-	No	0	1	120.62	0	0	FALSE	-	2-3-0-0-0		Hex-(Hex-)Hex-HexNAc-HexNAc+Hex
					2018	2013	1028.42	1028.09	3	3081.25	25.05	265.142	-	-	No	0	1	6.24	498.97	0	FALSE	-	4-11-0-0-0		Hex-Hex-Hex-Hex-(HexNAc-)Hex-(Hex-Hex-Hex-(Hex-HexNAc-)Hex-)Hex-HexNAc-HexNAc+Hex	Hex-Hex-Hex-Hex-Hex-Hex-(Hex-HexNAc-)Hex-(Hex-HexNAc-Hex-)Hex-HexNAc-HexNAc+Hex	Hex-Hex-Hex-Hex-Hex-(HexNAc-)Hex-(Hex-Hex-(Hex-HexNAc-)Hex-)Hex-HexNAc-HexNAc+Hex	Hex-Hex-Hex-Hex-Hex-(HexNAc-)Hex-(Hex-Hex-Hex-(HexNAc-)Hex-)Hex-HexNAc-HexNAc+Hex	Hex-Hex-Hex-Hex-Hex-Hex-(HexNAc-)Hex-(Hex-Hex-(HexNAc-)Hex-)Hex-HexNAc-HexNAc+Hex	Hex-Hex-Hex-Hex-Hex-Hex-(HexNAc-)Hex-(HexNAc-(Hex-Hex-)Hex-)Hex-HexNAc-HexNAc+Hex	Hex-Hex-Hex-Hex-Hex-Hex-Hex-(HexNAc-)Hex-(HexNAc-(Hex-)Hex-)Hex-HexNAc-HexNAc+Hex	Hex-Hex-Hex-Hex-Hex-Hex-Hex-Hex-(HexNAc-)Hex-(HexNAc-Hex-)Hex-HexNAc-HexNAc+Hex	Hex-Hex-Hex-Hex-Hex-Hex-(HexNAc-)Hex-(Hex-HexNAc-(Hex-)Hex-)Hex-HexNAc-HexNAc+Hex	Hex-Hex-Hex-Hex-Hex-(Hex-HexNAc-)Hex-(Hex-HexNAc-(Hex-)Hex-)Hex-HexNAc-HexNAc+Hex	Hex-Hex-Hex-Hex-(HexNAc-)Hex-(Hex-HexNAc-(Hex-Hex-Hex-)Hex-)Hex-HexNAc-HexNAc+Hex	Hex-Hex-Hex-(Hex-HexNAc-)Hex-(Hex-Hex-Hex-Hex-(HexNAc-)Hex-)Hex-HexNAc-HexNAc+Hex	Hex-Hex-Hex-(Hex-HexNAc-)Hex-(Hex-HexNAc-(Hex-Hex-Hex-)Hex-)Hex-HexNAc-HexNAc+Hex	Hex-Hex-Hex-Hex-(Hex-HexNAc-)Hex-(Hex-Hex-(Hex-HexNAc-)Hex-)Hex-HexNAc-HexNAc+Hex	Hex-Hex-Hex-Hex-(Hex-HexNAc-)Hex-(Hex-Hex-Hex-(HexNAc-)Hex-)Hex-HexNAc-HexNAc+Hex	Hex-Hex-Hex-Hex-Hex-(Hex-HexNAc-)Hex-(Hex-Hex-(HexNAc-)Hex-)Hex-HexNAc-HexNAc+Hex	Hex-Hex-Hex-Hex-(Hex-HexNAc-)Hex-(Hex-HexNAc-(Hex-Hex-)Hex-)Hex-HexNAc-HexNAc+Hex	Hex-Hex-Hex-Hex-Hex-(HexNAc-)Hex-(Hex-HexNAc-(Hex-Hex-)Hex-)Hex-HexNAc-HexNAc+Hex	Hex-Hex-Hex-Hex-Hex-(Hex-HexNAc-)Hex-(HexNAc-(Hex-Hex-)Hex-)Hex-HexNAc-HexNAc+Hex	Hex-Hex-Hex-Hex-Hex-Hex-Hex-(HexNAc-)Hex-(Hex-HexNAc-Hex-)Hex-HexNAc-HexNAc+Hex	Hex-Hex-Hex-Hex-(HexNAc-)Hex-(Hex-Hex-Hex-Hex-(HexNAc-)Hex-)Hex-HexNAc-HexNAc+Hex	Hex-Hex-Hex-(Hex-HexNAc-)Hex-(Hex-Hex-Hex-(Hex-HexNAc-)Hex-)Hex-HexNAc-HexNAc+Hex	Hex-Hex-Hex-Hex-Hex-Hex-Hex-Hex-(Hex-HexNAc-(HexNAc-)Hex-)Hex-HexNAc-HexNAc+Hex	Hex-Hex-Hex-Hex-Hex-Hex-(Hex-HexNAc-)Hex-(HexNAc-(Hex-)Hex-)Hex-HexNAc-HexNAc+Hex	Hex-Hex-Hex-Hex-Hex-Hex-Hex-Hex-(HexNAc-(Hex-HexNAc-)Hex-)Hex-HexNAc-HexNAc+Hex
					2020	2013	1148.21	1147.56	3	3439.65	25.06	1321.67	-	-	No	0	1	145.09	0	0	FALSE	-	2-3-0-0-0		Hex-(Hex-)Hex-HexNAc-HexNAc+Hex	Hex-(Hex-)Hex-HexNAc-(DeHex-)HexNAc+Hex
					2025	2024	677.823	677.823	2	1353.63	25.09	661.337	-	-	No	0	1	200.87	0	0	FALSE	-	2-3-0-0-0		Hex-(Hex-)Hex-HexNAc-HexNAc+Hex
					2027	2024	851.87	851.87	2	1701.73	25.11	745.893	-	-	No	0	1	80.21	0	0	FALSE	-	2-3-0-0-0		Hex-(Hex-)Hex-HexNAc-HexNAc+Hex
					2029	2024	1006.76	1006.09	3	3015.24	25.11	378.87	-	-	No	0	0.96	1.62	108.15	0	FALSE	-	3-5-1-0-0		HexNAc-Hex-Hex-Hex-(Hex-)Hex-HexNAc-(DeHex-)HexNAc+Hex	Hex-Hex-Hex-(HexNAc-Hex-)Hex-HexNAc-(DeHex-)HexNAc+Hex
					2031	2024	974.726	974.391	3	2920.15	25.12	1101.57	-	-	No	0	1	104	0	0	FALSE	-	2-3-0-0-0		Hex-(Hex-)Hex-HexNAc-HexNAc+Hex	Hex-(Hex-)Hex-HexNAc-(DeHex-)HexNAc+Hex
					2036	2035	865.387	865.387	2	1728.76	25.15	847.834	-	-	No	0	1	134.13	0	0	FALSE	-	2-3-0-0-0		Hex-(Hex-)Hex-HexNAc-HexNAc+Hex
					2038	2035	1090.94	1090.44	2	2178.87	25.17	745.893	-	-	No	0	1	133.72	0	0	FALSE	-	2-3-0-0-0		Hex-(Hex-)Hex-HexNAc-HexNAc+Hex	Hex-(Hex-)Hex-HexNAc-(DeHex-)HexNAc+Hex
					2040	2035	750.953	750.953	3	2249.84	25.18	718.7	-	-	No	0	1	102.33	0	0	FALSE	-	2-3-1-0-0		Hex-(Hex-)Hex-HexNAc-(DeHex-)HexNAc+Hex
					2042	2035	756.85	756.85	2	1511.68	25.19	699.337	-	-	No	0	1	109.03	0	0	FALSE	-	2-3-0-0-0		Hex-(Hex-)Hex-HexNAc-HexNAc+Hex
					2044	2035	873.413	872.919	2	1743.82	25.2	820.289	-	-	No	0	1	101.68	0	0	FALSE	-	2-3-0-0-0		Hex-(Hex-)Hex-HexNAc-HexNAc+Hex
					2047	2046	725.315	724.98	3	2171.92	25.22	785.265	-	-	No	0	1	106.59	0	0	FALSE	-	2-3-1-0-0		Hex-(Hex-)Hex-HexNAc-(DeHex-)HexNAc+Hex	Hex-(Hex-)Hex-HexNAc-HexNAc+Hex
					2049	2046	740.996	740.662	3	2218.97	25.23	655.063	-	-	No	0	1	160.1	0	0	FALSE	-	2-3-0-0-0		Hex-(Hex-)Hex-HexNAc-HexNAc+Hex
					2051	2046	687.348	687.348	2	1372.68	25.24	651.785	-	-	No	0	1	115.08	0	0	FALSE	-	2-3-0-0-0		Hex-(Hex-)Hex-HexNAc-HexNAc+Hex
					2053	2046	681.332	681.332	3	2040.97	25.25	646.644	-	-	No	0	1	101.2	0	0	FALSE	-	2-3-0-0-0		Hex-(Hex-)Hex-HexNAc-HexNAc+Hex	Hex-(Hex-)Hex-HexNAc-(DeHex-)HexNAc+Hex
					2055	2046	760.347	759.346	2	1516.68	25.26	724.303	-	-	No	0	1	110.2	0	0	FALSE	-	2-3-0-0-0		Hex-(Hex-)Hex-HexNAc-HexNAc+Hex
					2058	2057	789.32	789.32	2	1576.63	25.28	805.902	-	-	No	0	1	117.95	0	0	FALSE	-	2-3-0-0-0		Hex-(Hex-)Hex-HexNAc-HexNAc+Hex
					2060	2057	1110.99	1110.49	2	2218.97	25.29	1092.81	-	-	No	0	1	120.99	0	0	FALSE	-	2-3-0-0-0		Hex-(Hex-)Hex-HexNAc-HexNAc+Hex
					2062	2057	969.924	968.922	2	1935.83	25.31	1103.71	-	-	No	0	1	112.37	0	0	FALSE	-	2-3-0-0-0		Hex-(Hex-)Hex-HexNAc-HexNAc+Hex
					2064	2057	748.878	748.878	2	1495.74	25.32	696.363	-	-	No	0	1	103.21	0	0	FALSE	-	2-3-0-0-0		Hex-(Hex-)Hex-HexNAc-HexNAc+Hex
					2066	2057	812.403	812.403	3	2434.19	25.33	777.732	-	-	No	0	1	108.93	0	0	FALSE	-	2-3-0-0-0		Hex-(Hex-)Hex-HexNAc-HexNAc+Hex
					2069	2068	1509.13	1508.62	2	3015.23	25.35	1112.17	-	-	No	0	1	100.17	0	0	FALSE	-	2-3-0-0-0		Hex-(Hex-)Hex-HexNAc-HexNAc+Hex
					2071	2068	875.695	875.359	3	2623.05	25.36	447.864	-	-	No	0	1	2.67	104.03	0	FALSE	-	3-3-2-0-0		DeHex-HexNAc-Hex-(Hex-)Hex-HexNAc-(DeHex-)HexNAc+Hex
					2073	2068	1304.08	1303.59	2	2605.16	25.37	612.635	-	-	No	0	1	3.77	113.36	0	FALSE	-	3-4-2-0-0		DeHex-HexNAc-(Hex-)Hex-(Hex-)Hex-HexNAc-(DeHex-)HexNAc+Hex	DeHex-HexNAc-Hex-(Hex-Hex-)Hex-HexNAc-(DeHex-)HexNAc+Hex
					2075	2068	1198.51	1198.17	3	3591.49	25.38	750.302	-	-	No	0	0.97	3.03	204.5	-1	TRUE	-	5-7-1-0-0	1-0-0-0-0	Hex-(DeHex-)HexNAc-Hex-Hex-(Hex-)Hex-(HexNAc-Hex-)Hex-HexNAc-HexNAc+Hex1	Hex-(DeHex-)HexNAc-Hex-Hex-Hex-(HexNAc-(Hex-)Hex-)Hex-HexNAc-HexNAc+Hex1	Hex-(DeHex-)HexNAc-Hex-Hex-Hex-(Hex-HexNAc-Hex-)Hex-HexNAc-HexNAc+Hex1	Hex-(DeHex-)HexNAc-Hex-HexNAc-(Hex-)Hex-(Hex-Hex-)Hex-HexNAc-HexNAc+Hex1	Hex-(DeHex-)HexNAc-Hex-HexNAc-Hex-(Hex-(Hex-)Hex-)Hex-HexNAc-HexNAc+Hex1	Hex-(DeHex-)HexNAc-Hex-HexNAc-Hex-(Hex-Hex-Hex-)Hex-HexNAc-HexNAc+Hex1
					2077	2068	1268.54	1268.54	3	3802.61	25.4	1057.54	-	-	No	0	0.65	23.63	107.42	0	FALSE	-	3-7-0-0-0		HexNAc-Hex-Hex-Hex-(Hex-Hex-Hex-)Hex-HexNAc-HexNAc+Hex	Hex-HexNAc-Hex-Hex-Hex-(Hex-Hex-)Hex-HexNAc-HexNAc+Hex	HexNAc-Hex-Hex-(Hex-)Hex-(Hex-Hex-)Hex-HexNAc-HexNAc+Hex	Hex-Hex-Hex-Hex-(Hex-HexNAc-Hex-)Hex-HexNAc-HexNAc+Hex	Hex-Hex-Hex-Hex-(HexNAc-(Hex-)Hex-)Hex-HexNAc-HexNAc+Hex	Hex-Hex-Hex-Hex-Hex-(HexNAc-Hex-)Hex-HexNAc-HexNAc+Hex	Hex-Hex-Hex-(Hex-)Hex-(HexNAc-Hex-)Hex-HexNAc-HexNAc+Hex	HexNAc-Hex-Hex-Hex-(Hex-(Hex-)Hex-)Hex-HexNAc-HexNAc+Hex
					2080	2079	835.409	835.409	2	1668.8	25.42	799.816	-	-	No	0	1	42.43	0	0	FALSE	-	2-3-1-0-0		Hex-(Hex-)Hex-HexNAc-(DeHex-)HexNAc+Hex	Hex-(Hex-)Hex-HexNAc-HexNAc+Hex
					2082	2079	914.429	913.42	2	1824.83	25.43	650.136	-	-	No	0	1	103.14	0	0	FALSE	-	2-3-1-0-0		Hex-(Hex-)Hex-HexNAc-(DeHex-)HexNAc+Hex	Hex-(Hex-)Hex-HexNAc-HexNAc+Hex
					2084	2079	798.95	798.618	3	2392.83	25.44	581.906	-	-	No	0	1	121.79	0	0	FALSE	-	2-3-0-0-0		Hex-(Hex-)Hex-HexNAc-HexNAc+Hex
					2086	2079	714.368	714.368	3	2140.08	25.45	417.947	-	-	No	0	1	106	0	0	FALSE	-	2-3-1-0-0		Hex-(Hex-)Hex-HexNAc-(DeHex-)HexNAc+Hex	Hex-(Hex-)Hex-HexNAc-HexNAc+Hex
					2091	2090	705.864	705.864	2	1409.71	25.49	406.931	-	-	No	0	1	104.64	0	0	FALSE	-	2-3-1-0-0		Hex-(Hex-)Hex-HexNAc-(DeHex-)HexNAc+Hex	Hex-(Hex-)Hex-HexNAc-HexNAc+Hex
					2093	2090	863.4	863.4	3	2587.18	25.5	828.804	-	-	No	0	1	103.15	0.58	0	FALSE	-	3-3-0-0-0		Hex-(HexNAc-Hex-)Hex-HexNAc-HexNAc+Hex	HexNAc-Hex-(Hex-)Hex-HexNAc-HexNAc+Hex
					2097	2090	793.319	792.987	3	2375.94	25.53	758.515	-	-	No	0	1	103.51	0	0	FALSE	-	2-3-0-0-0		Hex-(Hex-)Hex-HexNAc-HexNAc+Hex	Hex-(Hex-)Hex-HexNAc-(DeHex-)HexNAc+Hex
					2099	2090	1786.26	1785.76	2	3569.51	25.54	930.592	-	-	No	0	0.68	87.36	118.89	-1	TRUE	-	4-5-0-1-0	0-1-0-0-0	NeuAc-Hex-HexNAc-Hex-(HexNAc-Hex-)Hex-HexNAc-HexNAc+HexNAc1	NeuAc-Hex-HexNAc-(HexNAc-)Hex-(Hex-)Hex-HexNAc-HexNAc+HexNAc1
					2102	2101	659.296	658.793	4	2631.14	25.56	396.425	-	-	No	0	1	12.55	134.49	0	FALSE	-	2-5-0-0-0		Hex-Hex-Hex-(Hex-)Hex-HexNAc-HexNAc+Hex	Hex-Hex-(Hex-Hex-)Hex-HexNAc-HexNAc+Hex
					2104	2101	1021.99	1021.49	2	2040.97	25.57	603.77	-	-	No	0	1	100.27	0	0	FALSE	-	2-3-0-0-0		Hex-(Hex-)Hex-HexNAc-HexNAc+Hex
					2106	2101	1313.04	1312.54	2	2623.07	25.58	756.378	-	-	No	0	1	0.25	100.92	0	FALSE	-	2-5-0-0-0		Hex-Hex-(Hex-Hex-)Hex-HexNAc-HexNAc+Hex	Hex-Hex-Hex-(Hex-)Hex-HexNAc-HexNAc+Hex
					2110	2101	1083.98	1083.98	2	2165.95	25.6	454.57	-	-	No	0	1	96.93	9.71	0	FALSE	-	2-5-1-0-0		Hex-Hex-(Hex-Hex-)Hex-HexNAc-(DeHex-)HexNAc+Hex	Hex-Hex-Hex-(Hex-)Hex-HexNAc-(DeHex-)HexNAc+Hex
					2113	2112	657.023	656.771	4	2623.05	25.63	443.437	-	-	No	0	1	117.71	24.82	0	FALSE	-	4-4-0-0-0		Hex-Hex-(HexNAc-(HexNAc-)Hex-)Hex-HexNAc-HexNAc+Hex	Hex-(HexNAc-)Hex-(HexNAc-Hex-)Hex-HexNAc-HexNAc+Hex
					2115	2112	831.381	831.381	2	1660.75	25.64	778.332	-	-	No	0	1	115.53	0	0	FALSE	-	2-3-0-0-0		Hex-(Hex-)Hex-HexNAc-HexNAc+Hex
					2117	2112	694.691	694.691	3	2081.05	25.65	613.451	-	-	No	0	1	107.56	0	0	FALSE	-	2-3-0-0-0		Hex-(Hex-)Hex-HexNAc-HexNAc+Hex
					2119	2112	662.762	662.261	4	2645.01	25.66	408.187	-	-	No	0	1	107.97	0	0	FALSE	-	2-3-1-0-0		Hex-(Hex-)Hex-HexNAc-(DeHex-)HexNAc+Hex	Hex-(Hex-)Hex-HexNAc-HexNAc+Hex
					2121	2112	843.641	843.641	3	2527.9	25.67	791.25	-	-	No	0	1	58.81	0	0	FALSE	-	2-3-1-0-0		Hex-(Hex-)Hex-HexNAc-(DeHex-)HexNAc+Hex
					2124	2123	709.324	708.823	4	2831.26	25.69	345.43	-	-	No	0	1	0.29	101.78	0	FALSE	-	4-5-0-0-0		Hex-Hex-(HexNAc-)Hex-(HexNAc-Hex-)Hex-HexNAc-HexNAc+Hex	HexNAc-(HexNAc-)Hex-(Hex-(Hex-)Hex-)Hex-HexNAc-HexNAc+Hex	HexNAc-(Hex-HexNAc-)Hex-(Hex-Hex-)Hex-HexNAc-HexNAc+Hex	Hex-HexNAc-(HexNAc-)Hex-(Hex-Hex-)Hex-HexNAc-HexNAc+Hex	Hex-(HexNAc-)Hex-(Hex-HexNAc-Hex-)Hex-HexNAc-HexNAc+Hex	Hex-(HexNAc-)Hex-(HexNAc-(Hex-)Hex-)Hex-HexNAc-HexNAc+Hex	Hex-(Hex-HexNAc-)Hex-(HexNAc-Hex-)Hex-HexNAc-HexNAc+Hex	HexNAc-(HexNAc-)Hex-(Hex-Hex-Hex-)Hex-HexNAc-HexNAc+Hex
					2126	2123	783.374	783.04	3	2346.1	25.71	748.586	-	-	No	0	1	100.34	0	0	FALSE	-	2-3-0-0-0		Hex-(Hex-)Hex-HexNAc-HexNAc+Hex
					2128	2123	731.317	731.317	3	2190.93	25.72	673.586	-	-	No	0	1	128.62	0	0	FALSE	-	2-3-0-0-0		Hex-(Hex-)Hex-HexNAc-HexNAc+Hex
					2130	2123	1102.52	1102.02	2	2202.03	25.73	810.162	-	-	No	0	1	108.41	0	0	FALSE	-	2-3-0-0-0		Hex-(Hex-)Hex-HexNAc-HexNAc+Hex
					2132	2123	810.351	809.857	2	1617.7	25.74	775.798	-	-	No	0	1	18.99	0	0	FALSE	-	2-3-0-0-0		Hex-(Hex-)Hex-HexNAc-HexNAc+Hex
					2135	2134	883.342	882.681	3	2645.02	25.76	812.688	-	-	No	0	1	83.08	0	0	FALSE	-	2-3-0-0-0		Hex-(Hex-)Hex-HexNAc-HexNAc+Hex
					2137	2134	1093.81	1093.48	3	3277.41	25.77	602.37	-	-	No	0	1	17.78	126.25	0	FALSE	-	4-6-0-1-0		NeuAc-Hex-HexNAc-(Hex-HexNAc-)Hex-(Hex-Hex-)Hex-HexNAc-HexNAc+Hex	NeuAc-Hex-HexNAc-Hex-(HexNAc-(Hex-Hex-)Hex-)Hex-HexNAc-HexNAc+Hex	NeuAc-Hex-HexNAc-Hex-(Hex-HexNAc-(Hex-)Hex-)Hex-HexNAc-HexNAc+Hex	NeuAc-Hex-HexNAc-(Hex-)Hex-(Hex-HexNAc-Hex-)Hex-HexNAc-HexNAc+Hex	NeuAc-Hex-HexNAc-(HexNAc-)Hex-(Hex-(Hex-)Hex-)Hex-HexNAc-HexNAc+Hex	NeuAc-Hex-HexNAc-(HexNAc-)Hex-(Hex-Hex-Hex-)Hex-HexNAc-HexNAc+Hex	NeuAc-Hex-HexNAc-(Hex-Hex-)Hex-(HexNAc-Hex-)Hex-HexNAc-HexNAc+Hex	NeuAc-Hex-HexNAc-(Hex-)Hex-(HexNAc-(Hex-)Hex-)Hex-HexNAc-HexNAc+Hex
					2139	2134	1150.49	1149.48	3	3445.41	25.78	1278.01	-	-	No	0	1	126.16	0	0	FALSE	-	2-3-0-0-0		Hex-(Hex-)Hex-HexNAc-HexNAc+Hex
					2141	2134	1713.23	1713.23	2	3424.44	25.79	930.592	-	-	No	0	0.55	103.71	111.88	-1	TRUE	-	4-5-1-0-0	0-1-0-0-0	HexNAc-(Hex-)Hex-(HexNAc-Hex-)Hex-HexNAc-(DeHex-)HexNAc+HexNAc1	Hex-HexNAc-(HexNAc-)Hex-(Hex-)Hex-HexNAc-(DeHex-)HexNAc+HexNAc1	HexNAc-Hex-HexNAc-Hex-(Hex-)Hex-HexNAc-(DeHex-)HexNAc+HexNAc1	Hex-HexNAc-Hex-(HexNAc-Hex-)Hex-HexNAc-(DeHex-)HexNAc+HexNAc1	HexNAc-(HexNAc-)Hex-(Hex-Hex-)Hex-HexNAc-(DeHex-)HexNAc+HexNAc1	HexNAc-Hex-(Hex-(HexNAc-)Hex-)Hex-HexNAc-(DeHex-)HexNAc+HexNAc1
					2143	2134	1588.14	1587.16	2	3172.32	25.8	1470.86	-	-	No	0	1	121.41	0	0	FALSE	-	2-3-0-0-0		Hex-(Hex-)Hex-HexNAc-HexNAc+Hex
					2148	2145	674.299	674.299	2	1346.58	25.84	648.342	-	-	No	0	1	105.88	0	0	FALSE	-	2-3-0-0-0		Hex-(Hex-)Hex-HexNAc-HexNAc+Hex
					2150	2145	818.83	818.326	2	1634.64	25.85	537.604	-	-	No	0	1	114.28	0	0	FALSE	-	2-3-0-0-0		Hex-(Hex-)Hex-HexNAc-HexNAc+Hex
					2152	2145	732.016	731.681	3	2192.02	25.86	520.786	-	-	No	0	1	123.43	0	0	FALSE	-	2-3-1-0-0		Hex-(Hex-)Hex-HexNAc-(DeHex-)HexNAc+Hex
					2157	2156	869.347	868.349	3	2602.03	25.89	837.091	-	-	No	0	1	102.97	0	0	FALSE	-	2-3-0-0-0		Hex-(Hex-)Hex-HexNAc-HexNAc+Hex
					2159	2156	853.72	853.386	3	2557.14	25.9	521.77	-	-	No	0	1	0.29	100	0	FALSE	-	3-3-0-0-0		Hex-(HexNAc-Hex-)Hex-HexNAc-HexNAc+Hex	HexNAc-Hex-(Hex-)Hex-HexNAc-HexNAc+Hex
					2161	2156	778.662	778.324	3	2331.95	25.91	809.706	-	-	No	0	0.93	109.13	0	0	FALSE	-	2-3-1-0-0		Hex-(Hex-)Hex-HexNAc-(DeHex-)HexNAc+Hex	Hex-(Hex-)Hex-HexNAc-HexNAc+Hex
					2163	2156	696.338	696.338	2	1390.66	25.92	661.176	-	-	No	0	1	113.67	0	0	FALSE	-	2-3-0-0-0		Hex-(Hex-)Hex-HexNAc-HexNAc+Hex
					2165	2156	933.464	933.464	2	1864.91	25.93	881.675	-	-	No	0	1	6.91	0	0	FALSE	-	2-3-1-0-0		Hex-(Hex-)Hex-HexNAc-(DeHex-)HexNAc+Hex
					2168	2167	663.832	663.335	2	1324.65	25.95	425.184	-	-	No	0	1	37.48	0	0	FALSE	-	2-3-0-0-0		Hex-(Hex-)Hex-HexNAc-HexNAc+Hex
					2170	2167	759.138	758.737	5	3788.65	25.96	459.728	-	-	No	0	1	3.08	111.44	0	FALSE	-	3-4-2-0-0		Hex-Hex-(DeHex-HexNAc-Hex-)Hex-HexNAc-(DeHex-)HexNAc+Hex
					2172	2167	669.064	668.811	4	2671.21	25.97	660.399	-	-	No	0	1	151.55	0	0	FALSE	-	2-3-1-0-0		Hex-(Hex-)Hex-HexNAc-(DeHex-)HexNAc+Hex	Hex-(Hex-)Hex-HexNAc-HexNAc+Hex
					2179	2178	1142.49	1142.16	3	3423.45	26.01	828.969	-	-	No	0	1	1.4	120.38	0	FALSE	-	4-5-1-0-0		DeHex-HexNAc-Hex-(HexNAc-(Hex-Hex-)Hex-)Hex-HexNAc-HexNAc+Hex	DeHex-HexNAc-(HexNAc-)Hex-(Hex-(Hex-)Hex-)Hex-HexNAc-HexNAc+Hex	DeHex-HexNAc-(Hex-)Hex-(Hex-HexNAc-Hex-)Hex-HexNAc-HexNAc+Hex	DeHex-HexNAc-(Hex-)Hex-(HexNAc-(Hex-)Hex-)Hex-HexNAc-HexNAc+Hex	DeHex-HexNAc-(Hex-Hex-)Hex-(HexNAc-Hex-)Hex-HexNAc-HexNAc+Hex	DeHex-HexNAc-(HexNAc-)Hex-(Hex-Hex-Hex-)Hex-HexNAc-HexNAc+Hex	DeHex-HexNAc-(Hex-HexNAc-)Hex-(Hex-Hex-)Hex-HexNAc-HexNAc+Hex	DeHex-HexNAc-Hex-(Hex-HexNAc-(Hex-)Hex-)Hex-HexNAc-HexNAc+Hex
					2181	2178	749.348	748.352	2	1494.69	26.02	695.748	-	-	No	0	1	115.92	0	0	FALSE	-	2-3-0-0-0		Hex-(Hex-)Hex-HexNAc-HexNAc+Hex
					2183	2178	906.374	905.87	2	1809.73	26.03	543.914	-	-	No	0	1	109.89	0	0	FALSE	-	2-3-0-0-0		Hex-(Hex-)Hex-HexNAc-HexNAc+Hex
					2185	2178	744.846	744.846	2	1487.68	26.04	731.497	-	-	No	0	1	111.97	0	0	FALSE	-	2-3-0-0-0		Hex-(Hex-)Hex-HexNAc-HexNAc+Hex
					2187	2178	909.648	909.152	4	3632.58	26.05	855.834	-	-	No	0	0.91	104.17	8.25	0	FALSE	-	2-4-0-0-0		Hex-(Hex-Hex-)Hex-HexNAc-HexNAc+Hex	Hex-Hex-(Hex-)Hex-HexNAc-HexNAc+Hex
					2192	2189	1012.41	1011.74	3	3032.21	26.08	848.806	-	-	No	0	1	163.71	156.05	0	FALSE	-	2-6-0-0-0		Hex-Hex-Hex-Hex-(Hex-)Hex-HexNAc-HexNAc+Hex	Hex-Hex-Hex-(Hex-Hex-)Hex-HexNAc-HexNAc+Hex	Hex-Hex-(Hex-Hex-Hex-)Hex-HexNAc-HexNAc+Hex
					2194	2189	989.93	989.423	2	1976.83	26.09	874.74	-	-	No	0	1	189.53	0	0	FALSE	-	2-3-1-0-0		Hex-(Hex-)Hex-HexNAc-(DeHex-)HexNAc+Hex
					2198	2189	1167.49	1166.99	2	2331.96	26.11	985.475	-	-	No	0	1	120.96	0	0	FALSE	-	2-3-0-0-0		Hex-(Hex-)Hex-HexNAc-HexNAc+Hex
					2203	2200	885.394	885.062	3	2652.16	26.15	382.691	-	-	No	1	0.74	5.01	273.92	0	FALSE	-	3-6-1-0-0		Hex-Hex-(Hex-(DeHex-)HexNAc-)Hex-(Hex-)Hex-HexNAc-HexNAc+Hex	Hex-Hex-Hex-(Hex-(DeHex-)HexNAc-Hex-)Hex-HexNAc-HexNAc+Hex	Hex-(Hex-)Hex-(Hex-(DeHex-)HexNAc-Hex-)Hex-HexNAc-HexNAc+Hex
					2205	2200	937.439	937.439	2	1872.86	26.16	714.837	-	-	No	0	1	118.94	0	0	FALSE	-	2-3-0-0-0		Hex-(Hex-)Hex-HexNAc-HexNAc+Hex
					2209	2200	808.307	807.977	3	2420.91	26.18	770.061	-	-	No	0	1	104.44	0	0	FALSE	-	2-3-0-0-0		Hex-(Hex-)Hex-HexNAc-HexNAc+Hex
					2212	2211	804.004	803.669	3	2407.99	26.2	632.419	-	-	No	0	1	106.5	0	0	FALSE	-	2-3-0-0-0		Hex-(Hex-)Hex-HexNAc-HexNAc+Hex	Hex-(Hex-)Hex-HexNAc-(DeHex-)HexNAc+Hex
					2214	2211	691.345	691.01	3	2070.01	26.21	656.399	-	-	No	0	1	100.78	0	0	FALSE	-	2-3-1-0-0		Hex-(Hex-)Hex-HexNAc-(DeHex-)HexNAc+Hex
					2216	2211	907.734	907.401	3	2719.18	26.22	360.424	-	-	No	1	1	27.28	291.73	0	FALSE	-	4-5-0-1-0		Hex-(HexNAc-)Hex-(NeuAc-Hex-HexNAc-Hex-)Hex-HexNAc-HexNAc+Hex	Hex-HexNAc-Hex-(NeuAc-Hex-HexNAc-Hex-)Hex-HexNAc-HexNAc+Hex	NeuAc-Hex-HexNAc-Hex-(Hex-HexNAc-Hex-)Hex-HexNAc-HexNAc+Hex	NeuAc-Hex-HexNAc-Hex-(HexNAc-(Hex-)Hex-)Hex-HexNAc-HexNAc+Hex	NeuAc-Hex-HexNAc-(HexNAc-)Hex-(Hex-Hex-)Hex-HexNAc-HexNAc+Hex	Hex-HexNAc-(NeuAc-Hex-HexNAc-)Hex-(Hex-)Hex-HexNAc-HexNAc+Hex	NeuAc-Hex-HexNAc-(Hex-HexNAc-)Hex-(Hex-)Hex-HexNAc-HexNAc+Hex	HexNAc-(Hex-)Hex-(NeuAc-Hex-HexNAc-Hex-)Hex-HexNAc-HexNAc+Hex	NeuAc-Hex-HexNAc-(Hex-)Hex-(HexNAc-Hex-)Hex-HexNAc-HexNAc+Hex	NeuAc-Hex-HexNAc-Hex-HexNAc-Hex-(Hex-)Hex-HexNAc-HexNAc+Hex
					2218	2211	958.392	957.727	3	2870.16	26.23	350.186	-	-	No	0	1	1.7	384.06	0	FALSE	-	3-9-1-0-0		HexNAc-Hex-Hex-(Hex-)Hex-(Hex-(Hex-Hex-)Hex-)Hex-HexNAc-(DeHex-)HexNAc+Hex	Hex-Hex-Hex-Hex-(Hex-)Hex-(Hex-HexNAc-Hex-)Hex-HexNAc-(DeHex-)HexNAc+Hex	Hex-Hex-Hex-(Hex-Hex-Hex-)Hex-(HexNAc-Hex-)Hex-HexNAc-(DeHex-)HexNAc+Hex	Hex-Hex-Hex-(Hex-Hex-)Hex-(HexNAc-(Hex-)Hex-)Hex-HexNAc-(DeHex-)HexNAc+Hex	Hex-Hex-Hex-(Hex-Hex-)Hex-(Hex-HexNAc-Hex-)Hex-HexNAc-(DeHex-)HexNAc+Hex	Hex-Hex-Hex-(Hex-)Hex-(Hex-HexNAc-(Hex-)Hex-)Hex-HexNAc-(DeHex-)HexNAc+Hex	Hex-Hex-Hex-(Hex-)Hex-(HexNAc-(Hex-Hex-)Hex-)Hex-HexNAc-(DeHex-)HexNAc+Hex	Hex-Hex-(Hex-Hex-Hex-)Hex-(Hex-HexNAc-Hex-)Hex-HexNAc-(DeHex-)HexNAc+Hex	Hex-Hex-Hex-(Hex-HexNAc-)Hex-(Hex-Hex-Hex-)Hex-HexNAc-(DeHex-)HexNAc+Hex	Hex-Hex-Hex-Hex-(HexNAc-)Hex-(Hex-Hex-Hex-)Hex-HexNAc-(DeHex-)HexNAc+Hex	Hex-HexNAc-(Hex-)Hex-(Hex-Hex-Hex-Hex-Hex-)Hex-HexNAc-(DeHex-)HexNAc+Hex	Hex-HexNAc-(Hex-)Hex-(Hex-Hex-(Hex-Hex-)Hex-)Hex-HexNAc-(DeHex-)HexNAc+Hex	HexNAc-Hex-Hex-(Hex-)Hex-(Hex-Hex-(Hex-)Hex-)Hex-HexNAc-(DeHex-)HexNAc+Hex	Hex-HexNAc-(Hex-)Hex-(Hex-Hex-Hex-(Hex-)Hex-)Hex-HexNAc-(DeHex-)HexNAc+Hex	Hex-HexNAc-(Hex-Hex-)Hex-(Hex-Hex-Hex-Hex-)Hex-HexNAc-(DeHex-)HexNAc+Hex	Hex-HexNAc-(Hex-Hex-)Hex-(Hex-Hex-(Hex-)Hex-)Hex-HexNAc-(DeHex-)HexNAc+Hex	Hex-HexNAc-(Hex-Hex-Hex-)Hex-(Hex-Hex-Hex-)Hex-HexNAc-(DeHex-)HexNAc+Hex	Hex-Hex-Hex-(HexNAc-)Hex-(Hex-Hex-(Hex-)Hex-)Hex-HexNAc-(DeHex-)HexNAc+Hex	Hex-Hex-Hex-Hex-(Hex-Hex-Hex-(HexNAc-)Hex-)Hex-HexNAc-(DeHex-)HexNAc+Hex	Hex-Hex-Hex-Hex-(Hex-Hex-(Hex-HexNAc-)Hex-)Hex-HexNAc-(DeHex-)HexNAc+Hex	Hex-Hex-Hex-Hex-(Hex-Hex-)Hex-(HexNAc-Hex-)Hex-HexNAc-(DeHex-)HexNAc+Hex	Hex-Hex-Hex-(Hex-)Hex-(Hex-Hex-(HexNAc-)Hex-)Hex-HexNAc-(DeHex-)HexNAc+Hex	Hex-Hex-Hex-Hex-Hex-(Hex-)Hex-(HexNAc-Hex-)Hex-HexNAc-(DeHex-)HexNAc+Hex	HexNAc-Hex-Hex-(Hex-Hex-)Hex-(Hex-Hex-Hex-)Hex-HexNAc-(DeHex-)HexNAc+Hex	Hex-HexNAc-Hex-Hex-Hex-(Hex-(Hex-Hex-)Hex-)Hex-HexNAc-(DeHex-)HexNAc+Hex
					2220	2211	977.455	976.788	3	2927.34	26.24	713.531	-	-	No	0	1	100.24	0	0	FALSE	-	2-3-1-0-0		Hex-(Hex-)Hex-HexNAc-(DeHex-)HexNAc+Hex	Hex-(Hex-)Hex-HexNAc-HexNAc+Hex
					2223	2222	767.359	766.864	2	1531.71	26.26	759.082	-	-	No	0	1	196.01	0	0	FALSE	-	2-3-0-0-0		Hex-(Hex-)Hex-HexNAc-HexNAc+Hex
					2225	2222	963.377	963.048	3	2886.12	26.27	336.916	-	-	No	0	1	1.8	302.52	-1	TRUE	-	4-9-1-0-0	0-1-0-0-0	Hex-Hex-(Hex-HexNAc-)Hex-(Hex-(Hex-HexNAc-)Hex-)Hex-HexNAc-(DeHex-)HexNAc+HexNAc1	Hex-HexNAc-(HexNAc-)Hex-(Hex-Hex-Hex-Hex-Hex-)Hex-HexNAc-(DeHex-)HexNAc+HexNAc1	Hex-HexNAc-(HexNAc-)Hex-(Hex-Hex-(Hex-Hex-)Hex-)Hex-HexNAc-(DeHex-)HexNAc+HexNAc1	Hex-HexNAc-(HexNAc-)Hex-(Hex-Hex-Hex-(Hex-)Hex-)Hex-HexNAc-(DeHex-)HexNAc+HexNAc1	Hex-HexNAc-(Hex-HexNAc-)Hex-(Hex-Hex-Hex-Hex-)Hex-HexNAc-(DeHex-)HexNAc+HexNAc1	Hex-HexNAc-(Hex-HexNAc-)Hex-(Hex-(Hex-Hex-)Hex-)Hex-HexNAc-(DeHex-)HexNAc+HexNAc1	Hex-HexNAc-(Hex-HexNAc-)Hex-(Hex-Hex-(Hex-)Hex-)Hex-HexNAc-(DeHex-)HexNAc+HexNAc1	Hex-Hex-(HexNAc-)Hex-(Hex-Hex-(Hex-HexNAc-)Hex-)Hex-HexNAc-(DeHex-)HexNAc+HexNAc1	Hex-Hex-(HexNAc-)Hex-(Hex-Hex-Hex-(HexNAc-)Hex-)Hex-HexNAc-(DeHex-)HexNAc+HexNAc1	Hex-Hex-Hex-(HexNAc-)Hex-(Hex-Hex-(HexNAc-)Hex-)Hex-HexNAc-(DeHex-)HexNAc+HexNAc1	Hex-Hex-(HexNAc-)Hex-(Hex-HexNAc-(Hex-Hex-)Hex-)Hex-HexNAc-(DeHex-)HexNAc+HexNAc1	Hex-Hex-(Hex-HexNAc-)Hex-(HexNAc-(Hex-Hex-)Hex-)Hex-HexNAc-(DeHex-)HexNAc+HexNAc1	Hex-Hex-(Hex-HexNAc-)Hex-(Hex-HexNAc-(Hex-)Hex-)Hex-HexNAc-(DeHex-)HexNAc+HexNAc1	Hex-Hex-Hex-(HexNAc-)Hex-(HexNAc-(Hex-Hex-)Hex-)Hex-HexNAc-(DeHex-)HexNAc+HexNAc1	Hex-HexNAc-Hex-HexNAc-(Hex-Hex-Hex-)Hex-(Hex-)Hex-HexNAc-(DeHex-)HexNAc+HexNAc1	Hex-Hex-Hex-(HexNAc-)Hex-(Hex-HexNAc-(Hex-)Hex-)Hex-HexNAc-(DeHex-)HexNAc+HexNAc1	Hex-Hex-Hex-Hex-(HexNAc-)Hex-(HexNAc-(Hex-)Hex-)Hex-HexNAc-(DeHex-)HexNAc+HexNAc1	Hex-Hex-Hex-Hex-Hex-(HexNAc-)Hex-(HexNAc-Hex-)Hex-HexNAc-(DeHex-)HexNAc+HexNAc1	Hex-HexNAc-(Hex-)Hex-(Hex-Hex-(Hex-HexNAc-)Hex-)Hex-HexNAc-(DeHex-)HexNAc+HexNAc1	Hex-HexNAc-(Hex-)Hex-(Hex-Hex-Hex-(HexNAc-)Hex-)Hex-HexNAc-(DeHex-)HexNAc+HexNAc1	Hex-HexNAc-(Hex-Hex-)Hex-(Hex-Hex-(HexNAc-)Hex-)Hex-HexNAc-(DeHex-)HexNAc+HexNAc1	Hex-HexNAc-(Hex-)Hex-(Hex-HexNAc-(Hex-Hex-)Hex-)Hex-HexNAc-(DeHex-)HexNAc+HexNAc1	Hex-HexNAc-(Hex-Hex-Hex-)Hex-(Hex-HexNAc-Hex-)Hex-HexNAc-(DeHex-)HexNAc+HexNAc1	Hex-HexNAc-(Hex-Hex-)Hex-(HexNAc-(Hex-Hex-)Hex-)Hex-HexNAc-(DeHex-)HexNAc+HexNAc1	Hex-HexNAc-(Hex-Hex-)Hex-(Hex-HexNAc-(Hex-)Hex-)Hex-HexNAc-(DeHex-)HexNAc+HexNAc1
					2227	2222	1017.4	1017.07	3	3048.18	26.28	856.77	-	-	No	0	1	135.84	172.24	-1	TRUE	-	2-7-0-0-0	0-1-0-0-0	Hex-Hex-Hex-Hex-(Hex-)Hex-HexNAc-HexNAc+HexNAc1	Hex-Hex-Hex-(Hex-Hex-)Hex-HexNAc-HexNAc+HexNAc1	Hex-Hex-(Hex-Hex-Hex-)Hex-HexNAc-HexNAc+HexNAc1
					2229	2222	1251.11	1250.6	2	2499.19	26.29	812.854	-	-	No	0	1	102.29	0	0	FALSE	-	2-3-0-0-0		Hex-(Hex-)Hex-HexNAc-HexNAc+Hex	Hex-(Hex-)Hex-HexNAc-(DeHex-)HexNAc+Hex
					2231	2222	1400.62	1400.62	2	2799.23	26.31	1128.7	-	-	No	0	1	142.62	15.31	0	FALSE	-	2-4-0-0-0		Hex-Hex-(Hex-)Hex-HexNAc-HexNAc+Hex	Hex-(Hex-Hex-)Hex-HexNAc-HexNAc+Hex
					2234	2233	684.851	684.348	2	1366.68	26.32	658.118	-	-	No	0	1	108.51	0	0	FALSE	-	2-3-0-0-0		Hex-(Hex-)Hex-HexNAc-HexNAc+Hex
					2236	2233	821.372	821.372	2	1640.73	26.34	523.227	-	-	No	0	1	103.19	0	0	FALSE	-	2-3-0-0-0		Hex-(Hex-)Hex-HexNAc-HexNAc+Hex	Hex-(Hex-)Hex-HexNAc-(DeHex-)HexNAc+Hex
					2238	2233	880.357	880.357	2	1758.7	26.35	787.702	-	-	No	0	1	106.74	0	0	FALSE	-	2-3-0-0-0		Hex-(Hex-)Hex-HexNAc-HexNAc+Hex
					2240	2233	954.426	954.092	3	2859.26	26.36	810.861	-	-	No	0	1	106.52	0	0	FALSE	-	2-3-1-0-0		Hex-(Hex-)Hex-HexNAc-(DeHex-)HexNAc+Hex	Hex-(Hex-)Hex-HexNAc-HexNAc+Hex
					2242	2233	753.338	753.338	3	2256.99	26.37	727.543	-	-	No	0	1	126.5	0	0	FALSE	-	2-3-0-0-0		Hex-(Hex-)Hex-HexNAc-HexNAc+Hex
					2245	2244	850.048	849.712	3	2546.12	26.39	815.421	-	-	No	0	1	100.58	0	0	FALSE	-	2-3-1-0-0		Hex-(Hex-)Hex-HexNAc-(DeHex-)HexNAc+Hex
					2249	2244	889.401	889.401	3	2665.18	26.42	261.389	-	-	No	0	1	2.24	222.48	0	FALSE	-	4-4-2-0-1		NeuGc-Hex-HexNAc-Hex-(DeHex-HexNAc-Hex-)Hex-HexNAc-(DeHex-)HexNAc+Hex	NeuGc-Hex-(DeHex-)HexNAc-(HexNAc-)Hex-(Hex-)Hex-HexNAc-(DeHex-)HexNAc+Hex	NeuGc-Hex-(DeHex-)HexNAc-Hex-(HexNAc-Hex-)Hex-HexNAc-(DeHex-)HexNAc+Hex	NeuGc-Hex-HexNAc-(DeHex-HexNAc-)Hex-(Hex-)Hex-HexNAc-(DeHex-)HexNAc+Hex
					2251	2244	939.447	939.447	3	2815.32	26.43	1200.44	-	-	No	0	1	103.3	0	0	FALSE	-	2-3-0-0-0		Hex-(Hex-)Hex-HexNAc-HexNAc+Hex
					2253	2244	1001.45	1000.45	2	1998.88	26.44	595.3	-	-	No	0	1	105.37	0	0	FALSE	-	2-3-0-0-0		Hex-(Hex-)Hex-HexNAc-HexNAc+Hex
					2256	2255	727.92	727.52	5	3632.56	26.46	528.23	-	-	No	0	1	5.15	102.32	0	FALSE	-	5-3-1-0-0		HexNAc-Hex-(HexNAc-(HexNAc-)Hex-)Hex-HexNAc-(DeHex-)HexNAc+Hex	HexNAc-(HexNAc-)Hex-(HexNAc-Hex-)Hex-HexNAc-(DeHex-)HexNAc+Hex
					2258	2255	766.048	765.377	3	2293.11	26.47	731.417	-	-	No	0	1	103.13	0	0	FALSE	-	2-3-0-0-0		Hex-(Hex-)Hex-HexNAc-HexNAc+Hex
					2262	2255	858.413	858.413	2	1714.81	26.49	824.091	-	-	No	0	1	104.69	0	0	FALSE	-	2-3-0-0-0		Hex-(Hex-)Hex-HexNAc-HexNAc+Hex
					2264	2255	1014.08	1013.74	3	3038.21	26.5	837.753	-	-	No	0	1	214.88	43.31	0	FALSE	-	2-5-0-0-0		Hex-Hex-(Hex-Hex-)Hex-HexNAc-HexNAc+Hex	Hex-Hex-Hex-(Hex-)Hex-HexNAc-HexNAc+Hex
					2267	2266	735.677	735.343	3	2203.01	26.52	628.436	-	-	No	0	1	137.97	0	0	FALSE	-	2-3-0-0-0		Hex-(Hex-)Hex-HexNAc-HexNAc+Hex
					2269	2266	672.761	672.761	2	1343.51	26.54	561.789	-	-	No	0	1	107.13	0	0	FALSE	-	2-3-1-0-0		Hex-(Hex-)Hex-HexNAc-(DeHex-)HexNAc+Hex	Hex-(Hex-)Hex-HexNAc-HexNAc+Hex
					2273	2266	698.37	698.034	3	2091.08	26.55	480.229	-	-	No	0	1	175.23	0	0	FALSE	-	2-3-1-0-0		Hex-(Hex-)Hex-HexNAc-(DeHex-)HexNAc+Hex	Hex-(Hex-)Hex-HexNAc-HexNAc+Hex
					2275	2266	774.679	774.341	3	2320	26.56	603.77	-	-	No	0	0.72	84.98	36.27	0	FALSE	-	3-3-0-0-0		HexNAc-Hex-(Hex-)Hex-HexNAc-HexNAc+Hex	Hex-(HexNAc-Hex-)Hex-HexNAc-HexNAc+Hex
					2278	2277	770.046	769.382	3	2305.12	26.58	752.621	-	-	No	0	1	103.55	0	0	FALSE	-	2-3-1-0-0		Hex-(Hex-)Hex-HexNAc-(DeHex-)HexNAc+Hex	Hex-(Hex-)Hex-HexNAc-HexNAc+Hex
					2280	2277	1108.44	1108.44	2	2214.88	26.6	966.324	-	-	No	0	1	15.78	0	0	FALSE	-	2-3-0-0-0		Hex-(Hex-)Hex-HexNAc-HexNAc+Hex
					2282	2277	904.039	903.705	3	2708.09	26.61	370.181	-	-	No	0	1	14.13	232.3	-1	TRUE	-	2-10-1-0-0	0-1-0-0-0	Hex-Hex-Hex-Hex-(Hex-Hex-Hex-Hex-)Hex-HexNAc-(DeHex-)HexNAc+HexNAc1	Hex-Hex-Hex-Hex-Hex-Hex-(Hex-Hex-)Hex-HexNAc-(DeHex-)HexNAc+HexNAc1	Hex-Hex-Hex-Hex-Hex-Hex-Hex-(Hex-)Hex-HexNAc-(DeHex-)HexNAc+HexNAc1	Hex-Hex-Hex-Hex-Hex-(Hex-Hex-Hex-)Hex-HexNAc-(DeHex-)HexNAc+HexNAc1
					2284	2277	805.399	805.399	2	1608.78	26.62	770.786	-	-	No	0	1	97.69	0	0	FALSE	-	2-3-1-0-0		Hex-(Hex-)Hex-HexNAc-(DeHex-)HexNAc+Hex	Hex-(Hex-)Hex-HexNAc-HexNAc+Hex
					2286	2277	971.036	970.838	5	4849.15	26.63	655.324	-	-	No	0	1	14.66	141.09	0	FALSE	-	4-4-1-0-0		Hex-(HexNAc-)Hex-(HexNAc-Hex-)Hex-HexNAc-(DeHex-)HexNAc+Hex	Hex-Hex-(HexNAc-(HexNAc-)Hex-)Hex-HexNAc-(DeHex-)HexNAc+Hex
					2289	2288	678.301	678.301	3	2031.88	26.65	543.914	-	-	No	0	1	110.81	0	0	FALSE	-	2-3-1-0-0		Hex-(Hex-)Hex-HexNAc-(DeHex-)HexNAc+Hex	Hex-(Hex-)Hex-HexNAc-HexNAc+Hex
					2291	2288	922.479	921.975	2	1841.93	26.66	869.846	-	-	No	0	1	100.11	0	0	FALSE	-	2-3-0-0-0		Hex-(Hex-)Hex-HexNAc-HexNAc+Hex
					2293	2288	919.511	919.014	2	1836.01	26.67	1268.75	-	-	No	0	1	106.26	0	0	FALSE	-	2-3-0-0-0		Hex-(Hex-)Hex-HexNAc-HexNAc+Hex
					2295	2288	836.919	836.919	2	1671.82	26.68	456.879	-	-	No	0	1	101.6	0	0	FALSE	-	2-3-0-0-0		Hex-(Hex-)Hex-HexNAc-HexNAc+Hex
					2297	2288	1520.62	1520.13	2	3038.24	26.69	1470.97	-	-	No	0	0.92	120.49	0	0	FALSE	-	2-3-0-0-0		Hex-(Hex-)Hex-HexNAc-HexNAc+Hex
					2302	2299	1007.98	1007.98	2	2013.94	26.73	1118.06	-	-	No	0	1	146.34	0	0	FALSE	-	2-3-0-0-0		Hex-(Hex-)Hex-HexNAc-HexNAc+Hex
					2306	2299	899.398	898.896	2	1795.78	26.75	1107.69	-	-	No	0	1	101.52	0	0	FALSE	-	2-3-0-0-0		Hex-(Hex-)Hex-HexNAc-HexNAc+Hex
					2308	2299	926.427	926.427	2	1850.84	26.76	874.231	-	-	No	0	1	100.32	0	0	FALSE	-	2-3-0-0-0		Hex-(Hex-)Hex-HexNAc-HexNAc+Hex
					2311	2310	739.64	739.305	3	2214.89	26.78	745.893	-	-	No	0	1	102.84	0	0	FALSE	-	2-3-1-0-0		Hex-(Hex-)Hex-HexNAc-(DeHex-)HexNAc+Hex	Hex-(Hex-)Hex-HexNAc-HexNAc+Hex
					2313	2310	666.318	666.318	3	1995.93	26.79	657.613	-	-	No	0	1	107.22	0	0	FALSE	-	2-3-1-0-0		Hex-(Hex-)Hex-HexNAc-(DeHex-)HexNAc+Hex	Hex-(Hex-)Hex-HexNAc-HexNAc+Hex
					2315	2310	846.372	845.866	2	1689.72	26.8	489.27	-	-	No	0	1	153.55	0	0	FALSE	-	2-3-0-0-0		Hex-(Hex-)Hex-HexNAc-HexNAc+Hex	Hex-(Hex-)Hex-HexNAc-(DeHex-)HexNAc+Hex
					2317	2310	1124.47	1123.97	2	2245.92	26.81	790.729	-	-	No	0	1	85.44	0	0	FALSE	-	2-3-0-0-0		Hex-(Hex-)Hex-HexNAc-HexNAc+Hex
					2322	2321	892.344	891.68	3	2672.02	26.84	754.701	-	-	No	0	1	100.31	0	0	FALSE	-	2-3-0-0-0		Hex-(Hex-)Hex-HexNAc-HexNAc+Hex
					2324	2321	1046.22	1045.73	4	4178.89	26.85	658.419	-	-	No	0	1	29.99	128.24	0	FALSE	-	4-4-2-0-1		NeuGc-Hex-HexNAc-(DeHex-HexNAc-)Hex-(Hex-)Hex-HexNAc-(DeHex-)HexNAc+Hex	NeuGc-Hex-HexNAc-Hex-(DeHex-HexNAc-Hex-)Hex-HexNAc-(DeHex-)HexNAc+Hex	NeuGc-Hex-(DeHex-)HexNAc-Hex-(HexNAc-Hex-)Hex-HexNAc-(DeHex-)HexNAc+Hex	NeuGc-Hex-(DeHex-)HexNAc-(HexNAc-)Hex-(Hex-)Hex-HexNAc-(DeHex-)HexNAc+Hex
					2326	2321	826.393	826.056	3	2475.15	26.86	993.845	-	-	No	0	1	143.33	0	0	FALSE	-	2-3-1-0-0		Hex-(Hex-)Hex-HexNAc-(DeHex-)HexNAc+Hex
					2328	2321	802.383	801.88	2	1601.74	26.87	697.45	-	-	No	0	1	121.02	0	0	FALSE	-	2-3-1-0-0		Hex-(Hex-)Hex-HexNAc-(DeHex-)HexNAc+Hex
					2333	2332	1071.99	1071.49	2	2140.97	26.91	1019.34	-	-	No	1	0.53	106.97	0	0	FALSE	-	2-3-0-0-0		Hex-(Hex-)Hex-HexNAc-HexNAc+Hex
					2335	2332	960.064	959.723	3	2876.15	26.92	907.299	-	-	No	0	0.84	104.88	0	0	FALSE	-	2-3-1-0-0		Hex-(Hex-)Hex-HexNAc-(DeHex-)HexNAc+Hex	Hex-(Hex-)Hex-HexNAc-HexNAc+Hex
					2337	2332	1440.09	1439.1	2	2876.18	26.93	579.289	-	-	No	0	0.91	2.21	118.76	0	FALSE	-	4-4-0-0-0		HexNAc-Hex-(HexNAc-(Hex-)Hex-)Hex-HexNAc-HexNAc+Hex	HexNAc-(Hex-HexNAc-)Hex-(Hex-)Hex-HexNAc-HexNAc+Hex	HexNAc-Hex-(Hex-HexNAc-Hex-)Hex-HexNAc-HexNAc+Hex
					2339	2332	1256.95	1256.44	2	2510.87	26.94	810.378	-	-	No	0	1	118.45	0	0	FALSE	-	2-3-1-0-0		Hex-(Hex-)Hex-HexNAc-(DeHex-)HexNAc+Hex
					2341	2332	785.852	785.852	2	1569.69	26.95	751.179	-	-	No	0	1	107.4	0	0	FALSE	-	2-3-0-0-0		Hex-(Hex-)Hex-HexNAc-HexNAc+Hex
					2344	2343	1319.59	1319.09	2	2636.16	26.97	1274.72	-	-	No	0	0.91	172.99	0	0	FALSE	-	2-3-0-0-0		Hex-(Hex-)Hex-HexNAc-HexNAc+Hex
					2346	2343	829.733	829.403	3	2485.19	26.98	690.623	-	-	No	0	1	114.63	0	0	FALSE	-	2-3-0-0-0		Hex-(Hex-)Hex-HexNAc-HexNAc+Hex	Hex-(Hex-)Hex-HexNAc-(DeHex-)HexNAc+Hex
					2348	2343	743.87	743.374	2	1484.73	27	525.48	-	-	No	0	1	50.96	0	0	FALSE	-	2-3-0-0-0		Hex-(Hex-)Hex-HexNAc-HexNAc+Hex
					2350	2343	1394.64	1393.96	3	4178.86	27.01	1361.7	-	-	No	0	1	29.78	108.8	0	FALSE	-	2-5-1-0-0		Hex-Hex-(Hex-Hex-)Hex-HexNAc-(DeHex-)HexNAc+Hex	Hex-Hex-Hex-(Hex-)Hex-HexNAc-(DeHex-)HexNAc+Hex
					2352	2343	781.395	781.395	2	1560.78	27.02	729.18	-	-	No	0	1	101.13	0	0	FALSE	-	2-3-0-0-0		Hex-(Hex-)Hex-HexNAc-HexNAc+Hex
					2355	2354	716.326	715.822	4	2859.26	27.04	527.389	-	-	No	0	1	105.24	0	0	FALSE	-	2-3-1-0-0		Hex-(Hex-)Hex-HexNAc-(DeHex-)HexNAc+Hex
					2357	2354	705.045	704.793	4	2815.14	27.05	324.649	-	-	No	0	0.92	10.19	225.67	0	FALSE	-	3-7-2-0-0		Hex-(DeHex-)HexNAc-Hex-(Hex-Hex-Hex-Hex-)Hex-HexNAc-(DeHex-)HexNAc+Hex	Hex-(DeHex-)HexNAc-Hex-(Hex-Hex-(Hex-)Hex-)Hex-HexNAc-(DeHex-)HexNAc+Hex	Hex-(DeHex-)HexNAc-(Hex-)Hex-(Hex-Hex-Hex-)Hex-HexNAc-(DeHex-)HexNAc+Hex	Hex-(DeHex-)HexNAc-(Hex-)Hex-(Hex-(Hex-)Hex-)Hex-HexNAc-(DeHex-)HexNAc+Hex	Hex-(DeHex-)HexNAc-(Hex-Hex-)Hex-(Hex-Hex-)Hex-HexNAc-(DeHex-)HexNAc+Hex	Hex-Hex-Hex-Hex-(DeHex-HexNAc-)Hex-(Hex-)Hex-HexNAc-(DeHex-)HexNAc+Hex	Hex-Hex-Hex-(DeHex-HexNAc-)Hex-(Hex-Hex-)Hex-HexNAc-(DeHex-)HexNAc+Hex	Hex-(DeHex-)HexNAc-(Hex-Hex-Hex-)Hex-(Hex-)Hex-HexNAc-(DeHex-)HexNAc+Hex	Hex-(DeHex-)HexNAc-Hex-(Hex-(Hex-Hex-)Hex-)Hex-HexNAc-(DeHex-)HexNAc+Hex
					2359	2354	1036.43	1035.43	2	2068.84	27.06	719.84	-	-	No	0	1	100.53	0	0	FALSE	-	2-3-0-0-0		Hex-(Hex-)Hex-HexNAc-HexNAc+Hex
					2361	2354	1120.13	1119.79	3	3356.36	27.07	551.536	-	-	No	0	1	9.2	206.11	-1	TRUE	-	5-8-1-0-0	1-0-0-0-0	Hex-Hex-Hex-Hex-Hex-Hex-(DeHex-HexNAc-(HexNAc-)Hex-)Hex-HexNAc-HexNAc+Hex1	Hex-Hex-Hex-Hex-Hex-(DeHex-HexNAc-(Hex-HexNAc-)Hex-)Hex-HexNAc-HexNAc+Hex1	Hex-Hex-Hex-Hex-(DeHex-HexNAc-)Hex-(Hex-(HexNAc-)Hex-)Hex-HexNAc-HexNAc+Hex1	Hex-Hex-Hex-(DeHex-HexNAc-)Hex-(Hex-Hex-(HexNAc-)Hex-)Hex-HexNAc-HexNAc+Hex1	Hex-Hex-Hex-(DeHex-HexNAc-)Hex-(Hex-(Hex-HexNAc-)Hex-)Hex-HexNAc-HexNAc+Hex1	Hex-Hex-Hex-Hex-Hex-(HexNAc-)Hex-(DeHex-HexNAc-Hex-)Hex-HexNAc-HexNAc+Hex1	Hex-Hex-Hex-Hex-(Hex-HexNAc-)Hex-(DeHex-HexNAc-Hex-)Hex-HexNAc-HexNAc+Hex1	Hex-Hex-(Hex-Hex-)Hex-(DeHex-HexNAc-(Hex-HexNAc-)Hex-)Hex-HexNAc-HexNAc+Hex1	Hex-Hex-(Hex-Hex-Hex-)Hex-(DeHex-HexNAc-(HexNAc-)Hex-)Hex-HexNAc-HexNAc+Hex1	Hex-Hex-Hex-(Hex-Hex-)Hex-(DeHex-HexNAc-(HexNAc-)Hex-)Hex-HexNAc-HexNAc+Hex1	Hex-Hex-Hex-(Hex-)Hex-(DeHex-HexNAc-(Hex-HexNAc-)Hex-)Hex-HexNAc-HexNAc+Hex1	Hex-HexNAc-(Hex-Hex-Hex-)Hex-(DeHex-HexNAc-(Hex-)Hex-)Hex-HexNAc-HexNAc+Hex1	Hex-Hex-Hex-Hex-(HexNAc-)Hex-(DeHex-HexNAc-(Hex-)Hex-)Hex-HexNAc-HexNAc+Hex1	Hex-Hex-Hex-(Hex-HexNAc-)Hex-(DeHex-HexNAc-(Hex-)Hex-)Hex-HexNAc-HexNAc+Hex1	Hex-Hex-Hex-(HexNAc-)Hex-(DeHex-HexNAc-(Hex-Hex-)Hex-)Hex-HexNAc-HexNAc+Hex1	Hex-Hex-(Hex-HexNAc-)Hex-(DeHex-HexNAc-(Hex-Hex-)Hex-)Hex-HexNAc-HexNAc+Hex1	DeHex-HexNAc-(Hex-HexNAc-)Hex-(Hex-Hex-Hex-(Hex-)Hex-)Hex-HexNAc-HexNAc+Hex1	DeHex-HexNAc-(Hex-HexNAc-)Hex-(Hex-Hex-(Hex-Hex-)Hex-)Hex-HexNAc-HexNAc+Hex1	DeHex-HexNAc-(Hex-HexNAc-)Hex-(Hex-Hex-Hex-Hex-Hex-)Hex-HexNAc-HexNAc+Hex1	Hex-HexNAc-(Hex-Hex-)Hex-(DeHex-HexNAc-(Hex-Hex-)Hex-)Hex-HexNAc-HexNAc+Hex1	Hex-Hex-Hex-Hex-(Hex-)Hex-(DeHex-HexNAc-(HexNAc-)Hex-)Hex-HexNAc-HexNAc+Hex1
					2368	2365	1067.98	1067.49	4	4265.92	27.11	1147.86	-	-	No	0	1	160.31	0	0	FALSE	-	2-3-1-0-0		Hex-(Hex-)Hex-HexNAc-(DeHex-)HexNAc+Hex
					2372	2365	1020.78	1020.45	3	3058.32	27.13	382.692	-	-	No	0	0.78	1.51	159.28	0	FALSE	-	5-7-1-0-0		HexNAc-Hex-HexNAc-Hex-(Hex-HexNAc-(Hex-Hex-)Hex-)Hex-HexNAc-(DeHex-)HexNAc+Hex	Hex-Hex-Hex-(HexNAc-)Hex-(HexNAc-(Hex-HexNAc-)Hex-)Hex-HexNAc-(DeHex-)HexNAc+Hex	Hex-HexNAc-Hex-HexNAc-(Hex-HexNAc-)Hex-(Hex-Hex-)Hex-HexNAc-(DeHex-)HexNAc+Hex	HexNAc-Hex-HexNAc-(Hex-HexNAc-)Hex-(Hex-(Hex-)Hex-)Hex-HexNAc-(DeHex-)HexNAc+Hex	HexNAc-Hex-HexNAc-(Hex-HexNAc-)Hex-(Hex-Hex-Hex-)Hex-HexNAc-(DeHex-)HexNAc+Hex	Hex-HexNAc-(Hex-HexNAc-)Hex-(Hex-HexNAc-(Hex-)Hex-)Hex-HexNAc-(DeHex-)HexNAc+Hex	Hex-HexNAc-(Hex-HexNAc-)Hex-(HexNAc-(Hex-Hex-)Hex-)Hex-HexNAc-(DeHex-)HexNAc+Hex	Hex-HexNAc-Hex-HexNAc-(HexNAc-)Hex-(Hex-(Hex-)Hex-)Hex-HexNAc-(DeHex-)HexNAc+Hex	Hex-Hex-(Hex-HexNAc-)Hex-(Hex-HexNAc-(HexNAc-)Hex-)Hex-HexNAc-(DeHex-)HexNAc+Hex	Hex-HexNAc-Hex-HexNAc-(HexNAc-)Hex-(Hex-Hex-Hex-)Hex-HexNAc-(DeHex-)HexNAc+Hex	HexNAc-Hex-HexNAc-(HexNAc-)Hex-(Hex-(Hex-Hex-)Hex-)Hex-HexNAc-(DeHex-)HexNAc+Hex	HexNAc-Hex-HexNAc-(HexNAc-)Hex-(Hex-Hex-Hex-Hex-)Hex-HexNAc-(DeHex-)HexNAc+Hex	Hex-HexNAc-(HexNAc-)Hex-(Hex-Hex-Hex-(HexNAc-)Hex-)Hex-HexNAc-(DeHex-)HexNAc+Hex	Hex-HexNAc-(HexNAc-)Hex-(Hex-Hex-(Hex-HexNAc-)Hex-)Hex-HexNAc-(DeHex-)HexNAc+Hex	Hex-HexNAc-(HexNAc-)Hex-(Hex-HexNAc-(Hex-Hex-)Hex-)Hex-HexNAc-(DeHex-)HexNAc+Hex	Hex-Hex-Hex-Hex-(HexNAc-)Hex-(HexNAc-(HexNAc-)Hex-)Hex-HexNAc-(DeHex-)HexNAc+Hex	Hex-Hex-Hex-(Hex-HexNAc-)Hex-(HexNAc-(HexNAc-)Hex-)Hex-HexNAc-(DeHex-)HexNAc+Hex	HexNAc-Hex-HexNAc-(HexNAc-)Hex-(Hex-Hex-(Hex-)Hex-)Hex-HexNAc-(DeHex-)HexNAc+Hex	Hex-HexNAc-(Hex-HexNAc-)Hex-(Hex-Hex-(HexNAc-)Hex-)Hex-HexNAc-(DeHex-)HexNAc+Hex	Hex-Hex-(HexNAc-)Hex-(Hex-HexNAc-(Hex-HexNAc-)Hex-)Hex-HexNAc-(DeHex-)HexNAc+Hex	Hex-Hex-(Hex-HexNAc-)Hex-(HexNAc-(Hex-HexNAc-)Hex-)Hex-HexNAc-(DeHex-)HexNAc+Hex	HexNAc-Hex-HexNAc-(Hex-Hex-)Hex-(HexNAc-(Hex-)Hex-)Hex-HexNAc-(DeHex-)HexNAc+Hex	HexNAc-Hex-HexNAc-(Hex-)Hex-(Hex-HexNAc-(Hex-)Hex-)Hex-HexNAc-(DeHex-)HexNAc+Hex	HexNAc-Hex-HexNAc-(Hex-Hex-)Hex-(Hex-HexNAc-Hex-)Hex-HexNAc-(DeHex-)HexNAc+Hex	Hex-HexNAc-Hex-HexNAc-(Hex-Hex-)Hex-(HexNAc-Hex-)Hex-HexNAc-(DeHex-)HexNAc+Hex
					2374	2365	956.106	955.774	3	2864.3	27.14	923.446	-	-	No	0	1	105.27	8.98	0	FALSE	-	2-4-0-0-0		Hex-(Hex-Hex-)Hex-HexNAc-HexNAc+Hex	Hex-Hex-(Hex-)Hex-HexNAc-HexNAc+Hex
					2377	2376	694.825	694.317	4	2773.24	27.16	284.404	-	-	No	0	1	1.31	138.38	0	FALSE	-	4-5-2-0-0		DeHex-HexNAc-Hex-HexNAc-(Hex-)Hex-(Hex-)Hex-HexNAc-(DeHex-)HexNAc+Hex	Hex-(Hex-HexNAc-)Hex-(DeHex-HexNAc-Hex-)Hex-HexNAc-(DeHex-)HexNAc+Hex	Hex-HexNAc-Hex-(DeHex-HexNAc-(Hex-)Hex-)Hex-HexNAc-(DeHex-)HexNAc+Hex	HexNAc-Hex-(DeHex-)HexNAc-(Hex-)Hex-(Hex-)Hex-HexNAc-(DeHex-)HexNAc+Hex	Hex-HexNAc-(DeHex-HexNAc-)Hex-(Hex-Hex-)Hex-HexNAc-(DeHex-)HexNAc+Hex	Hex-(DeHex-)HexNAc-(Hex-HexNAc-)Hex-(Hex-)Hex-HexNAc-(DeHex-)HexNAc+Hex	HexNAc-(Hex-)Hex-(DeHex-HexNAc-(Hex-)Hex-)Hex-HexNAc-(DeHex-)HexNAc+Hex	HexNAc-(Hex-Hex-)Hex-(DeHex-HexNAc-Hex-)Hex-HexNAc-(DeHex-)HexNAc+Hex	DeHex-HexNAc-(Hex-)Hex-(Hex-HexNAc-Hex-)Hex-HexNAc-(DeHex-)HexNAc+Hex	DeHex-HexNAc-(Hex-)Hex-(HexNAc-(Hex-)Hex-)Hex-HexNAc-(DeHex-)HexNAc+Hex	DeHex-HexNAc-(Hex-Hex-)Hex-(HexNAc-Hex-)Hex-HexNAc-(DeHex-)HexNAc+Hex	DeHex-HexNAc-(Hex-HexNAc-)Hex-(Hex-Hex-)Hex-HexNAc-(DeHex-)HexNAc+Hex	Hex-HexNAc-(Hex-)Hex-(DeHex-HexNAc-Hex-)Hex-HexNAc-(DeHex-)HexNAc+Hex	Hex-(DeHex-)HexNAc-Hex-(Hex-HexNAc-Hex-)Hex-HexNAc-(DeHex-)HexNAc+Hex	Hex-Hex-(HexNAc-)Hex-(DeHex-HexNAc-Hex-)Hex-HexNAc-(DeHex-)HexNAc+Hex	Hex-(DeHex-)HexNAc-(Hex-)Hex-(HexNAc-Hex-)Hex-HexNAc-(DeHex-)HexNAc+Hex	DeHex-HexNAc-Hex-HexNAc-Hex-(Hex-Hex-)Hex-HexNAc-(DeHex-)HexNAc+Hex	Hex-(DeHex-)HexNAc-(HexNAc-)Hex-(Hex-Hex-)Hex-HexNAc-(DeHex-)HexNAc+Hex	HexNAc-Hex-(DeHex-)HexNAc-Hex-(Hex-Hex-)Hex-HexNAc-(DeHex-)HexNAc+Hex	Hex-(HexNAc-)Hex-(DeHex-HexNAc-(Hex-)Hex-)Hex-HexNAc-(DeHex-)HexNAc+Hex	DeHex-HexNAc-(HexNAc-)Hex-(Hex-(Hex-)Hex-)Hex-HexNAc-(DeHex-)HexNAc+Hex	DeHex-HexNAc-(HexNAc-)Hex-(Hex-Hex-Hex-)Hex-HexNAc-(DeHex-)HexNAc+Hex	Hex-(DeHex-)HexNAc-Hex-(HexNAc-(Hex-)Hex-)Hex-HexNAc-(DeHex-)HexNAc+Hex	Hex-HexNAc-Hex-(DeHex-)HexNAc-Hex-(Hex-)Hex-HexNAc-(DeHex-)HexNAc+Hex
					2379	2376	655.612	655.612	3	1963.82	27.18	573.582	-	-	No	0	1	163.72	0	0	FALSE	-	2-3-1-0-0		Hex-(Hex-)Hex-HexNAc-(DeHex-)HexNAc+Hex	Hex-(Hex-)Hex-HexNAc-HexNAc+Hex
					2381	2376	940.976	940.976	2	1879.94	27.19	513.722	-	-	No	0	1	103.48	0	0	FALSE	-	2-3-0-0-0		Hex-(Hex-)Hex-HexNAc-HexNAc+Hex	Hex-(Hex-)Hex-HexNAc-(DeHex-)HexNAc+Hex
					2383	2376	855.385	855.385	2	1708.76	27.2	603.77	-	-	No	0	1	106.92	0	0	FALSE	-	2-3-0-0-0		Hex-(Hex-)Hex-HexNAc-HexNAc+Hex
					2385	2376	1084.8	1084.46	3	3250.36	27.21	733.975	-	-	No	1	0.78	14.93	171.37	-1	TRUE	-	5-6-0-0-0	1-0-0-0-0	Hex-(Hex-HexNAc-)Hex-(Hex-HexNAc-Hex-)Hex-HexNAc-HexNAc+Hex1	Hex-(HexNAc-)Hex-(Hex-HexNAc-(Hex-)Hex-)Hex-HexNAc-HexNAc+Hex1	Hex-(Hex-HexNAc-)Hex-(HexNAc-(Hex-)Hex-)Hex-HexNAc-HexNAc+Hex1	HexNAc-(HexNAc-)Hex-(Hex-Hex-Hex-Hex-)Hex-HexNAc-HexNAc+Hex1	HexNAc-(HexNAc-)Hex-(Hex-(Hex-Hex-)Hex-)Hex-HexNAc-HexNAc+Hex1	HexNAc-(HexNAc-)Hex-(Hex-Hex-(Hex-)Hex-)Hex-HexNAc-HexNAc+Hex1	HexNAc-(Hex-HexNAc-)Hex-(Hex-(Hex-)Hex-)Hex-HexNAc-HexNAc+Hex1	Hex-HexNAc-Hex-(HexNAc-(Hex-Hex-)Hex-)Hex-HexNAc-HexNAc+Hex1	Hex-HexNAc-Hex-(Hex-HexNAc-(Hex-)Hex-)Hex-HexNAc-HexNAc+Hex1	Hex-HexNAc-(HexNAc-)Hex-(Hex-Hex-Hex-)Hex-HexNAc-HexNAc+Hex1	HexNAc-(Hex-HexNAc-)Hex-(Hex-Hex-Hex-)Hex-HexNAc-HexNAc+Hex1	Hex-HexNAc-(Hex-HexNAc-)Hex-(Hex-Hex-)Hex-HexNAc-HexNAc+Hex1	Hex-HexNAc-(HexNAc-)Hex-(Hex-(Hex-)Hex-)Hex-HexNAc-HexNAc+Hex1	Hex-(HexNAc-)Hex-(HexNAc-(Hex-Hex-)Hex-)Hex-HexNAc-HexNAc+Hex1	HexNAc-(Hex-)Hex-(Hex-HexNAc-(Hex-)Hex-)Hex-HexNAc-HexNAc+Hex1	HexNAc-(Hex-)Hex-(HexNAc-(Hex-Hex-)Hex-)Hex-HexNAc-HexNAc+Hex1	HexNAc-(Hex-Hex-)Hex-(Hex-HexNAc-Hex-)Hex-HexNAc-HexNAc+Hex1	HexNAc-(Hex-Hex-)Hex-(HexNAc-(Hex-)Hex-)Hex-HexNAc-HexNAc+Hex1
					2388	2387	757.328	756.999	3	2267.97	27.22	492.594	-	-	No	0	1	101.16	0	0	FALSE	-	2-3-0-0-0		Hex-(Hex-)Hex-HexNAc-HexNAc+Hex	Hex-(Hex-)Hex-HexNAc-(DeHex-)HexNAc+Hex
					2392	2387	1096.5	1096	2	2189.99	27.25	1043.86	-	-	No	0	1	100.36	0	0	FALSE	-	2-3-1-0-0		Hex-(Hex-)Hex-HexNAc-(DeHex-)HexNAc+Hex	Hex-(Hex-)Hex-HexNAc-HexNAc+Hex
					2394	2387	1258.86	1258.53	3	3772.57	27.26	841.874	-	-	No	0	1	11.41	116.32	0	FALSE	-	4-7-1-0-0		Hex-HexNAc-(Hex-Hex-)Hex-(Hex-HexNAc-Hex-)Hex-HexNAc-(DeHex-)HexNAc+Hex	Hex-Hex-Hex-(Hex-HexNAc-)Hex-(HexNAc-Hex-)Hex-HexNAc-(DeHex-)HexNAc+Hex	Hex-Hex-Hex-Hex-(HexNAc-)Hex-(HexNAc-Hex-)Hex-HexNAc-(DeHex-)HexNAc+Hex	HexNAc-Hex-HexNAc-(Hex-)Hex-(Hex-Hex-Hex-)Hex-HexNAc-(DeHex-)HexNAc+Hex	Hex-HexNAc-Hex-HexNAc-(Hex-)Hex-(Hex-Hex-)Hex-HexNAc-(DeHex-)HexNAc+Hex	Hex-HexNAc-(Hex-Hex-)Hex-(HexNAc-(Hex-)Hex-)Hex-HexNAc-(DeHex-)HexNAc+Hex	HexNAc-Hex-Hex-(Hex-HexNAc-)Hex-(Hex-Hex-)Hex-HexNAc-(DeHex-)HexNAc+Hex	Hex-Hex-(Hex-HexNAc-)Hex-(HexNAc-(Hex-)Hex-)Hex-HexNAc-(DeHex-)HexNAc+Hex	Hex-HexNAc-Hex-Hex-(Hex-HexNAc-)Hex-(Hex-)Hex-HexNAc-(DeHex-)HexNAc+Hex	HexNAc-Hex-HexNAc-(Hex-Hex-)Hex-(Hex-Hex-)Hex-HexNAc-(DeHex-)HexNAc+Hex	HexNAc-Hex-HexNAc-(Hex-Hex-Hex-)Hex-(Hex-)Hex-HexNAc-(DeHex-)HexNAc+Hex	Hex-HexNAc-Hex-HexNAc-(Hex-Hex-)Hex-(Hex-)Hex-HexNAc-(DeHex-)HexNAc+Hex	Hex-Hex-Hex-(HexNAc-)Hex-(Hex-HexNAc-Hex-)Hex-HexNAc-(DeHex-)HexNAc+Hex	Hex-HexNAc-Hex-Hex-(HexNAc-)Hex-(Hex-Hex-)Hex-HexNAc-(DeHex-)HexNAc+Hex	HexNAc-Hex-Hex-(Hex-Hex-)Hex-(HexNAc-Hex-)Hex-HexNAc-(DeHex-)HexNAc+Hex	Hex-HexNAc-Hex-Hex-(Hex-)Hex-(HexNAc-Hex-)Hex-HexNAc-(DeHex-)HexNAc+Hex	Hex-HexNAc-Hex-Hex-Hex-(Hex-HexNAc-Hex-)Hex-HexNAc-(DeHex-)HexNAc+Hex	HexNAc-Hex-Hex-(Hex-)Hex-(Hex-HexNAc-Hex-)Hex-HexNAc-(DeHex-)HexNAc+Hex	HexNAc-Hex-HexNAc-Hex-(Hex-Hex-Hex-Hex-)Hex-HexNAc-(DeHex-)HexNAc+Hex	Hex-HexNAc-Hex-HexNAc-Hex-(Hex-Hex-Hex-)Hex-HexNAc-(DeHex-)HexNAc+Hex	HexNAc-Hex-HexNAc-Hex-(Hex-(Hex-Hex-)Hex-)Hex-HexNAc-(DeHex-)HexNAc+Hex	HexNAc-Hex-HexNAc-Hex-(Hex-Hex-(Hex-)Hex-)Hex-HexNAc-(DeHex-)HexNAc+Hex	Hex-HexNAc-Hex-HexNAc-Hex-(Hex-(Hex-)Hex-)Hex-HexNAc-(DeHex-)HexNAc+Hex	HexNAc-Hex-Hex-Hex-(HexNAc-(Hex-Hex-)Hex-)Hex-HexNAc-(DeHex-)HexNAc+Hex	HexNAc-Hex-Hex-Hex-(Hex-HexNAc-(Hex-)Hex-)Hex-HexNAc-(DeHex-)HexNAc+Hex
					2396	2387	722.317	721.984	3	2162.93	27.27	458.194	-	-	No	0	1	109.65	0	0	FALSE	-	2-3-0-0-0		Hex-(Hex-)Hex-HexNAc-HexNAc+Hex	Hex-(Hex-)Hex-HexNAc-(DeHex-)HexNAc+Hex
					2399	2398	992.139	991.459	3	2971.36	27.29	345.43	-	-	No	0	1	7.17	136.73	0	FALSE	-	4-5-1-0-1		NeuGc-Hex-(DeHex-)HexNAc-(HexNAc-)Hex-(Hex-Hex-)Hex-HexNAc-HexNAc+Hex	NeuGc-Hex-HexNAc-Hex-(DeHex-HexNAc-(Hex-)Hex-)Hex-HexNAc-HexNAc+Hex	NeuGc-Hex-(DeHex-)HexNAc-(Hex-HexNAc-)Hex-(Hex-)Hex-HexNAc-HexNAc+Hex	NeuGc-Hex-HexNAc-(DeHex-HexNAc-)Hex-(Hex-Hex-)Hex-HexNAc-HexNAc+Hex	NeuGc-Hex-HexNAc-(Hex-)Hex-(DeHex-HexNAc-Hex-)Hex-HexNAc-HexNAc+Hex	NeuGc-Hex-(DeHex-)HexNAc-Hex-(Hex-HexNAc-Hex-)Hex-HexNAc-HexNAc+Hex	NeuGc-Hex-(DeHex-)HexNAc-(Hex-)Hex-(HexNAc-Hex-)Hex-HexNAc-HexNAc+Hex	NeuGc-Hex-(DeHex-)HexNAc-Hex-(HexNAc-(Hex-)Hex-)Hex-HexNAc-HexNAc+Hex
					2401	2398	751.35	751.35	3	2251.03	27.3	698.689	-	-	No	0	1	138.38	0	0	FALSE	-	2-3-0-0-0		Hex-(Hex-)Hex-HexNAc-HexNAc+Hex
					2405	2398	814.901	814.901	2	1627.79	27.32	714.627	-	-	No	0	1	133.81	0	0	FALSE	-	2-3-0-0-0		Hex-(Hex-)Hex-HexNAc-HexNAc+Hex	Hex-(Hex-)Hex-HexNAc-(DeHex-)HexNAc+Hex
					2410	2409	817.868	817.868	2	1633.72	27.36	904.645	-	-	No	0	1	105.4	0	0	FALSE	-	2-3-0-0-0		Hex-(Hex-)Hex-HexNAc-HexNAc+Hex
					2412	2409	810.725	810.394	3	2428.16	27.37	812.854	-	-	No	0	1	169.62	0	0	FALSE	-	2-3-1-0-0		Hex-(Hex-)Hex-HexNAc-(DeHex-)HexNAc+Hex	Hex-(Hex-)Hex-HexNAc-HexNAc+Hex
					2414	2409	711.997	711.663	3	2131.97	27.38	815.367	-	-	No	0	1	102.86	0	0	FALSE	-	2-3-0-0-0		Hex-(Hex-)Hex-HexNAc-HexNAc+Hex
					2416	2409	1249.05	1248.56	2	2495.09	27.39	1117.74	-	-	No	0	1	112.78	0	0	FALSE	-	2-3-0-0-0		Hex-(Hex-)Hex-HexNAc-HexNAc+Hex
					2421	2420	792.404	792.404	2	1582.79	27.42	559.309	-	-	No	0	1	119.62	0	0	FALSE	-	2-3-0-0-0		Hex-(Hex-)Hex-HexNAc-HexNAc+Hex
					2425	2420	929.901	929.901	2	1857.79	27.44	669.044	-	-	No	0	1	62.84	0	0	FALSE	-	2-3-0-0-0		Hex-(Hex-)Hex-HexNAc-HexNAc+Hex	Hex-(Hex-)Hex-HexNAc-(DeHex-)HexNAc+Hex
					2429	2420	1429.12	1428.62	2	2855.23	27.46	1274.82	-	-	No	1	0.78	259.13	0	0	FALSE	-	2-3-0-0-0		Hex-(Hex-)Hex-HexNAc-HexNAc+Hex
					2432	2431	702.308	702.308	3	2103.9	27.48	668.107	-	-	No	0	1	111.74	0	0	FALSE	-	2-3-0-0-0		Hex-(Hex-)Hex-HexNAc-HexNAc+Hex
					2434	2431	724.599	724.348	4	2893.36	27.5	647.747	-	-	No	0	1	101.83	0	0	FALSE	-	2-3-0-0-0		Hex-(Hex-)Hex-HexNAc-HexNAc+Hex
					2436	2431	669.51	669.256	4	2672.99	27.51	521.77	-	-	No	0	1	101.02	0	0	FALSE	-	2-3-1-0-0		Hex-(Hex-)Hex-HexNAc-(DeHex-)HexNAc+Hex	Hex-(Hex-)Hex-HexNAc-HexNAc+Hex
					2438	2431	831.375	831.038	3	2490.09	27.52	556.927	-	-	No	1	0.52	19.79	158.15	-1	TRUE	-	3-6-0-0-0	1-0-0-0-0	Hex-Hex-Hex-Hex-(Hex-)Hex-HexNAc-HexNAc+Hex1	Hex-Hex-Hex-(Hex-Hex-)Hex-HexNAc-HexNAc+Hex1	Hex-Hex-(Hex-Hex-Hex-)Hex-HexNAc-HexNAc+Hex1
					2440	2431	968.464	967.458	2	1932.9	27.53	369.193	-	-	No	0	1	0.26	23.32	0	FALSE	-	4-3-0-0-0		HexNAc-(HexNAc-)Hex-(Hex-)Hex-HexNAc-HexNAc+Hex	HexNAc-Hex-(HexNAc-Hex-)Hex-HexNAc-HexNAc+Hex
					2443	2442	763.022	762.689	3	2285.05	27.55	952.364	-	-	No	0	1	102.75	0	0	FALSE	-	2-3-0-0-0		Hex-(Hex-)Hex-HexNAc-HexNAc+Hex
					2445	2442	651.641	651.641	3	1951.9	27.56	599.263	-	-	No	0	1	113.19	0	0	FALSE	-	2-3-0-0-0		Hex-(Hex-)Hex-HexNAc-HexNAc+Hex
					2449	2442	996.143	995.808	3	2984.4	27.58	1281.7	-	-	No	0	1	102.85	0	0	FALSE	-	2-3-0-0-0		Hex-(Hex-)Hex-HexNAc-HexNAc+Hex	Hex-(Hex-)Hex-HexNAc-(DeHex-)HexNAc+Hex
					2454	2453	823.367	823.116	4	3288.43	27.61	476.894	-	-	No	0	1	0.97	106.33	0	FALSE	-	3-4-2-0-0		DeHex-HexNAc-(Hex-)Hex-(Hex-)Hex-HexNAc-(DeHex-)HexNAc+Hex	DeHex-HexNAc-Hex-(Hex-Hex-)Hex-HexNAc-(DeHex-)HexNAc+Hex
					2458	2453	924.185	923.683	4	3690.7	27.63	641.639	-	-	No	1	0.78	39.45	115.69	0	FALSE	-	3-4-2-0-0		DeHex-HexNAc-(Hex-)Hex-(Hex-)Hex-HexNAc-(DeHex-)HexNAc+Hex	Hex-(DeHex-)HexNAc-Hex-(Hex-)Hex-HexNAc-(DeHex-)HexNAc+Hex	DeHex-HexNAc-Hex-(Hex-Hex-)Hex-HexNAc-(DeHex-)HexNAc+Hex
					2460	2453	1011.78	1011.43	3	3031.28	27.64	324.649	-	-	No	0	0.52	1.71	290.11	0	FALSE	-	4-7-3-0-0		Hex-(DeHex-)HexNAc-(Hex-)Hex-(Hex-(DeHex-)HexNAc-(Hex-)Hex-)Hex-HexNAc-(DeHex-)HexNAc+Hex	Hex-(DeHex-)HexNAc-(Hex-Hex-)Hex-(Hex-(DeHex-)HexNAc-Hex-)Hex-HexNAc-(DeHex-)HexNAc+Hex	Hex-(DeHex-)HexNAc-Hex-(DeHex-)HexNAc-Hex-(Hex-(Hex-)Hex-)Hex-HexNAc-(DeHex-)HexNAc+Hex	Hex-(DeHex-)HexNAc-Hex-(DeHex-)HexNAc-(Hex-)Hex-(Hex-Hex-)Hex-HexNAc-(DeHex-)HexNAc+Hex	Hex-(DeHex-)HexNAc-Hex-(DeHex-)HexNAc-Hex-(Hex-Hex-Hex-)Hex-HexNAc-(DeHex-)HexNAc+Hex	Hex-(DeHex-)HexNAc-Hex-(DeHex-)HexNAc-(Hex-Hex-)Hex-(Hex-)Hex-HexNAc-(DeHex-)HexNAc+Hex
					2465	2464	710.012	709.678	3	2126.01	27.67	951.3	-	-	No	0	1	100.63	0	0	FALSE	-	2-3-1-0-0		Hex-(Hex-)Hex-HexNAc-(DeHex-)HexNAc+Hex	Hex-(Hex-)Hex-HexNAc-HexNAc+Hex
					2469	2464	807.624	807.624	3	2419.85	27.69	754.25	-	-	No	0	1	102.07	0	0	FALSE	-	2-3-1-0-0		Hex-(Hex-)Hex-HexNAc-(DeHex-)HexNAc+Hex	Hex-(Hex-)Hex-HexNAc-HexNAc+Hex
					2471	2464	1224.59	1223.91	3	3668.72	27.7	1321.67	-	-	No	0	1	186.55	0	0	FALSE	-	2-3-0-0-0		Hex-(Hex-)Hex-HexNAc-HexNAc+Hex
					2473	2464	982.488	981.984	2	1961.95	27.71	915.675	-	-	No	0	1	131.13	0	0	FALSE	-	2-3-0-0-0		Hex-(Hex-)Hex-HexNAc-HexNAc+Hex
					2476	2475	978.38	978.046	3	2931.12	27.73	543.914	-	-	No	0	1	0.16	100.85	0	FALSE	-	3-4-1-0-0		Hex-Hex-(HexNAc-Hex-)Hex-HexNAc-(DeHex-)HexNAc+Hex
					2478	2475	676.569	676.569	4	2702.25	27.75	377.209	-	-	No	0	1	63.5	104.97	0	FALSE	-	3-4-2-0-0		Hex-Hex-(DeHex-HexNAc-Hex-)Hex-HexNAc-(DeHex-)HexNAc+Hex
					2480	2475	693.295	692.966	3	2075.88	27.76	671.975	-	-	No	0	1	107.91	0	0	FALSE	-	2-3-1-0-0		Hex-(Hex-)Hex-HexNAc-(DeHex-)HexNAc+Hex
					2482	2475	729.384	729.049	3	2184.12	27.77	493.58	-	-	No	0	1	12.46	0	0	FALSE	-	2-3-1-0-0		Hex-(Hex-)Hex-HexNAc-(DeHex-)HexNAc+Hex
					2484	2475	1043.94	1043.44	2	2084.86	27.78	762.519	-	-	No	0	1	132.6	0	0	FALSE	-	2-3-0-0-0		Hex-(Hex-)Hex-HexNAc-HexNAc+Hex
					2487	2486	883.328	883.328	2	1764.64	27.8	821.203	-	-	No	0	1	45.96	0	0	FALSE	-	2-3-0-0-0		Hex-(Hex-)Hex-HexNAc-HexNAc+Hex
					2489	2486	1137.15	1136.81	3	3407.42	27.81	739.867	-	-	No	0	0.69	15.31	125.01	0	FALSE	-	4-6-1-0-0		Hex-HexNAc-(HexNAc-)Hex-(Hex-(Hex-)Hex-)Hex-HexNAc-(DeHex-)HexNAc+Hex	Hex-(HexNAc-)Hex-(Hex-HexNAc-(Hex-)Hex-)Hex-HexNAc-(DeHex-)HexNAc+Hex	Hex-(HexNAc-)Hex-(HexNAc-(Hex-Hex-)Hex-)Hex-HexNAc-(DeHex-)HexNAc+Hex	HexNAc-(Hex-)Hex-(HexNAc-(Hex-Hex-)Hex-)Hex-HexNAc-(DeHex-)HexNAc+Hex	Hex-(Hex-HexNAc-)Hex-(HexNAc-(Hex-)Hex-)Hex-HexNAc-(DeHex-)HexNAc+Hex	HexNAc-(HexNAc-)Hex-(Hex-Hex-Hex-Hex-)Hex-HexNAc-(DeHex-)HexNAc+Hex	HexNAc-(Hex-HexNAc-)Hex-(Hex-Hex-Hex-)Hex-HexNAc-(DeHex-)HexNAc+Hex	Hex-(Hex-HexNAc-)Hex-(Hex-HexNAc-Hex-)Hex-HexNAc-(DeHex-)HexNAc+Hex	HexNAc-(HexNAc-)Hex-(Hex-(Hex-Hex-)Hex-)Hex-HexNAc-(DeHex-)HexNAc+Hex	HexNAc-(Hex-HexNAc-)Hex-(Hex-(Hex-)Hex-)Hex-HexNAc-(DeHex-)HexNAc+Hex	Hex-HexNAc-Hex-(HexNAc-(Hex-Hex-)Hex-)Hex-HexNAc-(DeHex-)HexNAc+Hex	Hex-HexNAc-Hex-(Hex-HexNAc-(Hex-)Hex-)Hex-HexNAc-(DeHex-)HexNAc+Hex	Hex-HexNAc-(HexNAc-)Hex-(Hex-Hex-Hex-)Hex-HexNAc-(DeHex-)HexNAc+Hex	Hex-HexNAc-(Hex-HexNAc-)Hex-(Hex-Hex-)Hex-HexNAc-(DeHex-)HexNAc+Hex	HexNAc-(Hex-Hex-)Hex-(Hex-HexNAc-Hex-)Hex-HexNAc-(DeHex-)HexNAc+Hex	HexNAc-(HexNAc-)Hex-(Hex-Hex-(Hex-)Hex-)Hex-HexNAc-(DeHex-)HexNAc+Hex	HexNAc-(Hex-)Hex-(Hex-HexNAc-(Hex-)Hex-)Hex-HexNAc-(DeHex-)HexNAc+Hex	HexNAc-(Hex-Hex-)Hex-(HexNAc-(Hex-)Hex-)Hex-HexNAc-(DeHex-)HexNAc+Hex
					2491	2486	688.361	688.029	3	2061.07	27.82	554.768	-	-	No	0	1	114.7	0	0	FALSE	-	2-3-0-0-0		Hex-(Hex-)Hex-HexNAc-HexNAc+Hex
					2493	2486	965.459	965.459	2	1928.9	27.83	1053.68	-	-	No	0	1	101.76	0	0	FALSE	-	2-3-0-0-0		Hex-(Hex-)Hex-HexNAc-HexNAc+Hex
					2495	2486	1421.6	1421.27	3	4260.78	27.84	1275.77	-	-	No	1	0.85	61.87	183.02	-2	TRUE	-	4-5-2-0-0	1-1-0-0-0	Hex-Hex-(DeHex-HexNAc-Hex-)Hex-HexNAc-(DeHex-)HexNAc+Hex1HexNAc1
					2498	2497	684.837	684.341	2	1366.67	27.86	738.88	-	-	No	0	1	54.84	0	0	FALSE	-	2-3-0-0-0		Hex-(Hex-)Hex-HexNAc-HexNAc+Hex
					2500	2497	821.146	820.897	4	3279.56	27.87	566.277	-	-	No	0	1	100.21	0	0	FALSE	-	2-3-0-0-0		Hex-(Hex-)Hex-HexNAc-HexNAc+Hex	Hex-(Hex-)Hex-HexNAc-(DeHex-)HexNAc+Hex
					2502	2497	758.858	757.356	2	1512.7	27.88	648.291	-	-	No	0	1	103.99	0	0	FALSE	-	2-3-0-0-0		Hex-(Hex-)Hex-HexNAc-HexNAc+Hex
					2504	2497	878.341	877.677	3	2630.01	27.89	843.368	-	-	No	0	1	100.46	0.04	0	FALSE	-	3-3-0-0-0		HexNAc-Hex-(Hex-)Hex-HexNAc-HexNAc+Hex	Hex-(HexNAc-Hex-)Hex-HexNAc-HexNAc+Hex
					2506	2497	1152.16	1151.49	3	3451.44	27.9	700.305	-	-	No	0	0.61	6.33	150.31	0	FALSE	-	3-8-1-0-0		Hex-HexNAc-Hex-Hex-(Hex-)Hex-(Hex-Hex-)Hex-HexNAc-(DeHex-)HexNAc+Hex	HexNAc-Hex-Hex-Hex-(Hex-(Hex-Hex-)Hex-)Hex-HexNAc-(DeHex-)HexNAc+Hex	Hex-Hex-Hex-Hex-(Hex-HexNAc-(Hex-)Hex-)Hex-HexNAc-(DeHex-)HexNAc+Hex	Hex-Hex-Hex-(Hex-Hex-)Hex-(HexNAc-Hex-)Hex-HexNAc-(DeHex-)HexNAc+Hex	Hex-Hex-Hex-(Hex-)Hex-(HexNAc-(Hex-)Hex-)Hex-HexNAc-(DeHex-)HexNAc+Hex	Hex-Hex-Hex-(Hex-)Hex-(Hex-HexNAc-Hex-)Hex-HexNAc-(DeHex-)HexNAc+Hex	Hex-HexNAc-Hex-Hex-Hex-(Hex-(Hex-)Hex-)Hex-HexNAc-(DeHex-)HexNAc+Hex	Hex-Hex-Hex-Hex-(HexNAc-(Hex-Hex-)Hex-)Hex-HexNAc-(DeHex-)HexNAc+Hex	HexNAc-Hex-Hex-(Hex-Hex-)Hex-(Hex-Hex-)Hex-HexNAc-(DeHex-)HexNAc+Hex	HexNAc-Hex-Hex-(Hex-)Hex-(Hex-(Hex-)Hex-)Hex-HexNAc-(DeHex-)HexNAc+Hex
					2509	2508	753.873	753.873	2	1505.73	27.92	481.481	-	-	No	0	1	86.72	0	0	FALSE	-	2-3-1-0-0		Hex-(Hex-)Hex-HexNAc-(DeHex-)HexNAc+Hex	Hex-(Hex-)Hex-HexNAc-HexNAc+Hex
					2511	2508	680.355	680.355	2	1358.69	27.93	645.866	-	-	No	0	1	113.09	0	0	FALSE	-	2-3-1-0-0		Hex-(Hex-)Hex-HexNAc-(DeHex-)HexNAc+Hex	Hex-(Hex-)Hex-HexNAc-HexNAc+Hex
					2517	2508	1358.57	1358.08	2	2714.14	27.96	1470.93	-	-	No	0	0.89	113.7	0	0	FALSE	-	2-3-0-0-0		Hex-(Hex-)Hex-HexNAc-HexNAc+Hex
					2520	2519	796.731	796.731	3	2387.17	27.98	601.526	-	-	No	0	1	116.51	0	0	FALSE	-	2-3-1-0-0		Hex-(Hex-)Hex-HexNAc-(DeHex-)HexNAc+Hex
					2524	2519	867.94	867.94	2	1733.87	28	841.874	-	-	No	0	1	27.17	0	0	FALSE	-	2-3-0-0-0		Hex-(Hex-)Hex-HexNAc-HexNAc+Hex
					2526	2519	659.529	659.529	4	2634.09	28.02	624.388	-	-	No	0	1	111.68	0	0	FALSE	-	2-3-1-0-0		Hex-(Hex-)Hex-HexNAc-(DeHex-)HexNAc+Hex	Hex-(Hex-)Hex-HexNAc-HexNAc+Hex
					2528	2519	914.381	914.048	3	2739.12	28.03	528.23	-	-	No	0	1	1.06	101.48	0	FALSE	-	3-4-0-0-0		Hex-Hex-(HexNAc-Hex-)Hex-HexNAc-HexNAc+Hex
					2531	2530	733.352	732.851	4	2927.38	28.05	390.19	-	-	No	0	1	9.77	131.89	0	FALSE	-	2-6-1-0-0		Hex-Hex-Hex-Hex-(Hex-)Hex-HexNAc-(DeHex-)HexNAc+Hex	Hex-Hex-Hex-(Hex-Hex-)Hex-HexNAc-(DeHex-)HexNAc+Hex	Hex-Hex-(Hex-Hex-Hex-)Hex-HexNAc-(DeHex-)HexNAc+Hex
					2533	2530	840.408	839.905	2	1677.8	28.06	459.728	-	-	No	0	1	121.11	0	0	FALSE	-	2-3-1-0-0		Hex-(Hex-)Hex-HexNAc-(DeHex-)HexNAc+Hex	Hex-(Hex-)Hex-HexNAc-HexNAc+Hex
					2537	2530	1003.08	1002.75	3	3005.22	28.08	507.267	-	-	No	0	0.68	3.92	172.91	0	FALSE	-	3-8-0-0-0		Hex-Hex-Hex-Hex-Hex-(HexNAc-(Hex-)Hex-)Hex-HexNAc-HexNAc+Hex	HexNAc-Hex-Hex-Hex-(Hex-Hex-(Hex-)Hex-)Hex-HexNAc-HexNAc+Hex	HexNAc-Hex-Hex-Hex-Hex-(Hex-)Hex-(Hex-)Hex-HexNAc-HexNAc+Hex	Hex-HexNAc-Hex-Hex-Hex-Hex-Hex-(Hex-)Hex-HexNAc-HexNAc+Hex	Hex-Hex-Hex-Hex-(Hex-)Hex-(HexNAc-Hex-)Hex-HexNAc-HexNAc+Hex	Hex-Hex-Hex-Hex-Hex-(Hex-HexNAc-Hex-)Hex-HexNAc-HexNAc+Hex	HexNAc-Hex-Hex-(Hex-)Hex-(Hex-Hex-Hex-)Hex-HexNAc-HexNAc+Hex	Hex-HexNAc-Hex-Hex-Hex-(Hex-Hex-Hex-)Hex-HexNAc-HexNAc+Hex	HexNAc-Hex-Hex-Hex-(Hex-Hex-Hex-Hex-)Hex-HexNAc-HexNAc+Hex
					2539	2530	889.435	888.774	3	2663.3	28.09	1211.47	-	-	No	0	1	100.67	0	0	FALSE	-	2-3-0-0-0		Hex-(Hex-)Hex-HexNAc-HexNAc+Hex
					2542	2541	1465.19	1464.69	2	2927.36	28.11	593.544	-	-	No	0	1	132.5	0	0	FALSE	-	2-3-0-0-0		Hex-(Hex-)Hex-HexNAc-HexNAc+Hex
					2544	2541	984.458	984.126	3	2949.36	28.12	653.634	-	-	No	0	1	15.05	115.3	0	FALSE	-	4-4-0-0-0		Hex-(HexNAc-)Hex-(HexNAc-Hex-)Hex-HexNAc-HexNAc+Hex	Hex-Hex-(HexNAc-(HexNAc-)Hex-)Hex-HexNAc-HexNAc+Hex
					2546	2541	1384.11	1383.62	2	2765.22	28.13	1331.49	-	-	No	0	1	100.04	0	0	FALSE	-	2-3-1-0-0		Hex-(Hex-)Hex-HexNAc-(DeHex-)HexNAc+Hex	Hex-(Hex-)Hex-HexNAc-HexNAc+Hex
					2548	2541	989.449	989.449	3	2965.33	28.14	561.789	-	-	No	0	1	1.77	106.67	0	FALSE	-	4-3-1-0-0		HexNAc-(HexNAc-)Hex-(Hex-)Hex-HexNAc-(DeHex-)HexNAc+Hex	HexNAc-Hex-(HexNAc-Hex-)Hex-HexNAc-(DeHex-)HexNAc+Hex
					2550	2541	1025.91	1025.91	2	2049.81	28.15	735.045	-	-	No	0	1	185.11	0	0	FALSE	-	2-3-0-0-0		Hex-(Hex-)Hex-HexNAc-HexNAc+Hex
					2555	2552	770.323	769.985	3	2306.93	28.19	277.812	-	-	No	0	0.94	16.55	102.83	0	FALSE	-	4-3-0-0-0		HexNAc-Hex-(HexNAc-Hex-)Hex-HexNAc-HexNAc+Hex	HexNAc-(HexNAc-)Hex-(Hex-)Hex-HexNAc-HexNAc+Hex
					2557	2552	777.364	777.024	3	2328.05	28.2	556.927	-	-	No	0	0.82	33.13	135.8	-1	TRUE	-	3-5-0-0-0	1-0-0-0-0	Hex-Hex-Hex-(Hex-)Hex-HexNAc-HexNAc+Hex1	Hex-Hex-(Hex-Hex-)Hex-HexNAc-HexNAc+Hex1
					2559	2552	879.754	879.423	3	2635.25	28.21	1041.41	-	-	No	0	1	100.74	0	0	FALSE	-	2-3-0-0-0		Hex-(Hex-)Hex-HexNAc-HexNAc+Hex
					2561	2552	918.446	918.446	4	3669.75	28.22	892.008	-	-	No	0	1	152.61	0	0	FALSE	-	2-3-0-0-0		Hex-(Hex-)Hex-HexNAc-HexNAc+Hex	Hex-(Hex-)Hex-HexNAc-(DeHex-)HexNAc+Hex
					2564	2563	657.848	657.848	2	1313.68	28.24	373.45	-	-	No	0	1	101.26	0	0	FALSE	-	2-3-0-0-0		Hex-(Hex-)Hex-HexNAc-HexNAc+Hex
					2566	2563	971.128	970.794	3	2909.36	28.25	714.837	-	-	No	0	0.93	36.83	102.18	0	FALSE	-	4-3-0-0-0		HexNAc-Hex-(HexNAc-Hex-)Hex-HexNAc-HexNAc+Hex	HexNAc-(HexNAc-)Hex-(Hex-)Hex-HexNAc-HexNAc+Hex
					2570	2563	910.342	910.002	3	2726.98	28.27	874.413	-	-	No	0	1	125.08	0	0	FALSE	-	2-3-1-0-0		Hex-(Hex-)Hex-HexNAc-(DeHex-)HexNAc+Hex
					2572	2563	673.304	673.304	4	2689.19	28.28	454.74	-	-	No	0	1	102.73	4.95	0	FALSE	-	3-5-0-0-0		HexNAc-(Hex-Hex-)Hex-(Hex-)Hex-HexNAc-HexNAc+Hex	HexNAc-Hex-(Hex-(Hex-)Hex-)Hex-HexNAc-HexNAc+Hex	Hex-HexNAc-(Hex-)Hex-(Hex-)Hex-HexNAc-HexNAc+Hex	HexNAc-(Hex-)Hex-(Hex-Hex-)Hex-HexNAc-HexNAc+Hex	Hex-HexNAc-Hex-(Hex-Hex-)Hex-HexNAc-HexNAc+Hex	HexNAc-Hex-(Hex-Hex-Hex-)Hex-HexNAc-HexNAc+Hex
					2575	2574	689.825	689.825	2	1377.63	28.3	654.706	-	-	No	0	1	128.71	0	0	FALSE	-	2-3-0-0-0		Hex-(Hex-)Hex-HexNAc-HexNAc+Hex
					2577	2574	848.693	848.354	3	2542.04	28.31	312.174	-	-	No	0	1	5.73	113.82	0	FALSE	-	4-3-2-0-0		DeHex-HexNAc-Hex-(DeHex-HexNAc-Hex-)Hex-HexNAc-HexNAc+Hex	DeHex-HexNAc-(DeHex-HexNAc-)Hex-(Hex-)Hex-HexNAc-HexNAc+Hex
					2579	2574	866.917	866.416	2	1730.82	28.32	703.006	-	-	No	0	1	180	0	0	FALSE	-	2-3-0-0-0		Hex-(Hex-)Hex-HexNAc-HexNAc+Hex
					2581	2574	1081.95	1081.45	2	2160.88	28.33	1029.24	-	-	No	0	1	101.48	0	0	FALSE	-	2-3-0-0-0		Hex-(Hex-)Hex-HexNAc-HexNAc+Hex
					2583	2574	812.362	811.692	3	2432.05	28.34	906.324	-	-	No	0	1	155.8	0	0	FALSE	-	2-3-0-0-0		Hex-(Hex-)Hex-HexNAc-HexNAc+Hex
					2586	2585	871.361	870.862	2	1739.71	28.36	719.84	-	-	No	0	1	119.54	0	0	FALSE	-	2-3-0-0-0		Hex-(Hex-)Hex-HexNAc-HexNAc+Hex
					2588	2585	664.546	664.295	4	2653.15	28.37	377.209	-	-	No	0	0.94	3.96	103.21	0	FALSE	-	2-5-0-0-0		Hex-Hex-(Hex-Hex-)Hex-HexNAc-HexNAc+Hex	Hex-Hex-Hex-(Hex-)Hex-HexNAc-HexNAc+Hex
					2590	2585	766.365	766.365	2	1530.72	28.38	386.529	-	-	No	0	1	127.44	0	0	FALSE	-	2-3-1-0-0		Hex-(Hex-)Hex-HexNAc-(DeHex-)HexNAc+Hex	Hex-(Hex-)Hex-HexNAc-HexNAc+Hex
					2592	2585	1110.5	1110.16	3	3327.45	28.39	834.312	-	-	No	0	0.98	266.36	165.76	-1	TRUE	-	2-9-0-0-0	0-1-0-0-0	Hex-Hex-Hex-Hex-Hex-Hex-(Hex-)Hex-HexNAc-HexNAc+HexNAc1	Hex-Hex-Hex-Hex-Hex-(Hex-Hex-)Hex-HexNAc-HexNAc+HexNAc1	Hex-Hex-Hex-Hex-(Hex-Hex-Hex-)Hex-HexNAc-HexNAc+HexNAc1	Hex-Hex-Hex-(Hex-Hex-Hex-Hex-)Hex-HexNAc-HexNAc+HexNAc1
					2594	2585	805.378	805.039	3	2412.09	28.4	619.065	-	-	No	0	1	167.98	0	0	FALSE	-	2-3-1-0-0		Hex-(Hex-)Hex-HexNAc-(DeHex-)HexNAc+Hex	Hex-(Hex-)Hex-HexNAc-HexNAc+Hex
					2597	2596	744.7	744.7	3	2231.08	28.42	672.291	-	-	No	0	1	101.51	0	0	FALSE	-	2-3-1-0-0		Hex-(Hex-)Hex-HexNAc-(DeHex-)HexNAc+Hex	Hex-(Hex-)Hex-HexNAc-HexNAc+Hex
					2599	2596	1024.48	1024.15	3	3069.44	28.44	971.312	-	-	No	0	1	107.01	0	0	FALSE	-	2-3-0-0-0		Hex-(Hex-)Hex-HexNAc-HexNAc+Hex
					2601	2596	1030.91	1030.91	2	2059.82	28.45	966.316	-	-	No	0	1	87.43	0	0	FALSE	-	2-3-0-0-0		Hex-(Hex-)Hex-HexNAc-HexNAc+Hex
					2603	2596	897.933	897.431	4	3585.69	28.46	567.801	-	-	No	0	1	1.41	103.97	0	FALSE	-	3-5-0-0-0		HexNAc-(Hex-Hex-)Hex-(Hex-)Hex-HexNAc-HexNAc+Hex	HexNAc-Hex-(Hex-(Hex-)Hex-)Hex-HexNAc-HexNAc+Hex	HexNAc-(Hex-)Hex-(Hex-Hex-)Hex-HexNAc-HexNAc+Hex	Hex-HexNAc-Hex-(Hex-Hex-)Hex-HexNAc-HexNAc+Hex	HexNAc-Hex-(Hex-Hex-Hex-)Hex-HexNAc-HexNAc+Hex	Hex-HexNAc-(Hex-)Hex-(Hex-)Hex-HexNAc-HexNAc+Hex
					2605	2596	1250.86	1250.53	3	3748.57	28.47	1100.46	-	-	No	0	0.66	53.78	132.9	0	FALSE	-	4-3-3-0-0		DeHex-HexNAc-(DeHex-HexNAc-)Hex-(Hex-)Hex-HexNAc-(DeHex-)HexNAc+Hex	DeHex-HexNAc-Hex-(DeHex-HexNAc-Hex-)Hex-HexNAc-(DeHex-)HexNAc+Hex
					2608	2607	696.809	696.559	4	2782.21	28.49	684.219	-	-	No	0	0.84	127.54	0	0	FALSE	-	2-3-1-0-0		Hex-(Hex-)Hex-HexNAc-(DeHex-)HexNAc+Hex	Hex-(Hex-)Hex-HexNAc-HexNAc+Hex
					2610	2607	682.323	682.323	3	2043.95	28.5	525.48	-	-	No	0	1	100.9	0	0	FALSE	-	2-3-0-0-0		Hex-(Hex-)Hex-HexNAc-HexNAc+Hex	Hex-(Hex-)Hex-HexNAc-(DeHex-)HexNAc+Hex
					2612	2607	846.365	846.365	2	1690.72	28.51	565.31	-	-	No	0	1	110.37	0	0	FALSE	-	2-3-0-0-0		Hex-(Hex-)Hex-HexNAc-HexNAc+Hex
					2614	2607	1117.05	1116.55	2	2231.08	28.52	1067.93	-	-	No	0	1	100.51	0	0	FALSE	-	2-3-0-0-0		Hex-(Hex-)Hex-HexNAc-HexNAc+Hex
					2616	2607	861.387	861.055	3	2580.14	28.53	448.52	-	-	No	0	0.84	9.56	114.36	0	FALSE	-	3-4-1-0-0		HexNAc-(Hex-)Hex-(Hex-)Hex-HexNAc-(DeHex-)HexNAc+Hex	HexNAc-Hex-(Hex-Hex-)Hex-HexNAc-(DeHex-)HexNAc+Hex	Hex-HexNAc-Hex-(Hex-)Hex-HexNAc-(DeHex-)HexNAc+Hex
					2619	2618	736.681	736.016	3	2205.03	28.55	725.109	-	-	No	0	1	123.04	0	0	FALSE	-	2-3-0-0-0		Hex-(Hex-)Hex-HexNAc-HexNAc+Hex	Hex-(Hex-)Hex-HexNAc-(DeHex-)HexNAc+Hex
					2621	2618	766.365	765.871	2	1529.73	28.56	487.28	-	-	No	0	1	105.08	0	0	FALSE	-	2-3-0-0-0		Hex-(Hex-)Hex-HexNAc-HexNAc+Hex
					2623	2618	1015.44	1015.11	3	3042.3	28.57	812.854	-	-	No	0	0.61	14.52	140.74	0	FALSE	-	3-5-0-0-0		HexNAc-(Hex-Hex-)Hex-(Hex-)Hex-HexNAc-HexNAc+Hex	HexNAc-(Hex-)Hex-(Hex-Hex-)Hex-HexNAc-HexNAc+Hex	Hex-HexNAc-(Hex-)Hex-(Hex-)Hex-HexNAc-HexNAc+Hex	Hex-HexNAc-Hex-(Hex-Hex-)Hex-HexNAc-HexNAc+Hex	HexNAc-Hex-(Hex-(Hex-)Hex-)Hex-HexNAc-HexNAc+Hex	HexNAc-Hex-(Hex-Hex-Hex-)Hex-HexNAc-HexNAc+Hex
					2625	2618	1192.13	1191.8	3	3572.39	28.58	550.733	-	-	No	0	0.97	5.71	198.61	-2	TRUE	-	4-7-3-1-0	0-0-2-0-0	NeuAc-Hex-HexNAc-Hex-(Hex-HexNAc-Hex-Hex-Hex-)Hex-HexNAc-(DeHex-)HexNAc+DeHex2
					2627	2618	939.452	939.452	2	1876.89	28.59	641.639	-	-	No	0	1	112.06	0	0	FALSE	-	2-3-0-0-0		Hex-(Hex-)Hex-HexNAc-HexNAc+Hex
					2630	2629	705.326	705.077	4	2816.28	28.61	290.148	-	-	No	0	0.88	3.95	149.32	0	FALSE	-	3-3-2-0-0		DeHex-HexNAc-Hex-(Hex-)Hex-HexNAc-(DeHex-)HexNAc+Hex
					2632	2629	997.467	997.467	2	1992.92	28.63	661.132	-	-	No	0	1	211.22	0	0	FALSE	-	2-3-0-0-0		Hex-(Hex-)Hex-HexNAc-HexNAc+Hex	Hex-(Hex-)Hex-HexNAc-(DeHex-)HexNAc+Hex
					2634	2629	774.35	774.35	4	3093.37	28.64	348.183	-	-	No	0	1	4.92	123.33	0	FALSE	-	6-4-2-0-0		DeHex-HexNAc-(HexNAc-)Hex-(HexNAc-(Hex-HexNAc-)Hex-)Hex-HexNAc-(DeHex-)HexNAc+Hex	DeHex-HexNAc-(HexNAc-)Hex-(Hex-HexNAc-(HexNAc-)Hex-)Hex-HexNAc-(DeHex-)HexNAc+Hex	DeHex-HexNAc-(Hex-HexNAc-)Hex-(HexNAc-(HexNAc-)Hex-)Hex-HexNAc-(DeHex-)HexNAc+Hex
					2636	2629	892.015	891.678	3	2672.01	28.65	700.305	-	-	No	0	1	100.84	0	0	FALSE	-	2-3-1-0-0		Hex-(Hex-)Hex-HexNAc-(DeHex-)HexNAc+Hex
					2638	2629	740.347	740.018	3	2217.03	28.66	705.725	-	-	No	0	1	103.11	0	0	FALSE	-	2-3-0-0-0		Hex-(Hex-)Hex-HexNAc-HexNAc+Hex	Hex-(Hex-)Hex-HexNAc-(DeHex-)HexNAc+Hex
					2641	2640	1300.55	1299.88	3	3896.63	28.68	918.449	-	-	No	0	1	2.84	161.08	0	FALSE	-	4-5-3-0-0		DeHex-HexNAc-Hex-(DeHex-)HexNAc-Hex-(Hex-Hex-)Hex-HexNAc-(DeHex-)HexNAc+Hex
					2643	2640	825.028	824.694	3	2471.06	28.69	579.289	-	-	No	0	1	118.39	0	0	FALSE	-	2-3-0-0-0		Hex-(Hex-)Hex-HexNAc-HexNAc+Hex	Hex-(Hex-)Hex-HexNAc-(DeHex-)HexNAc+Hex
					2645	2640	1008.14	1007.47	3	3019.39	28.7	696.369	-	-	No	0	1	101.33	0	0	FALSE	-	2-3-0-0-0		Hex-(Hex-)Hex-HexNAc-HexNAc+Hex
					2647	2640	1120.46	1119.97	2	2237.92	28.71	1088.33	-	-	No	0	1	102.85	0	0	FALSE	-	2-3-0-0-0		Hex-(Hex-)Hex-HexNAc-HexNAc+Hex	Hex-(Hex-)Hex-HexNAc-(DeHex-)HexNAc+Hex
					2649	2640	857.308	856.98	3	2567.92	28.73	821.817	-	-	No	0	1	109.12	0	0	FALSE	-	2-3-0-0-0		Hex-(Hex-)Hex-HexNAc-HexNAc+Hex
					2652	2651	838.366	838.366	3	2512.08	28.75	750.698	-	-	No	1	0.64	373.46	46.57	-1	TRUE	-	2-5-0-0-0	0-1-0-0-0	Hex-Hex-(Hex-)Hex-HexNAc-HexNAc+HexNAc1	Hex-(Hex-Hex-)Hex-HexNAc-HexNAc+HexNAc1
					2654	2651	654.648	653.65	3	1957.93	28.76	620.621	-	-	No	0	1	163.35	0	0	FALSE	-	2-3-0-0-0		Hex-(Hex-)Hex-HexNAc-HexNAc+Hex
					2656	2651	954.407	954.407	2	1906.8	28.77	878.477	-	-	No	0	1	163.91	0	0	FALSE	-	2-3-0-0-0		Hex-(Hex-)Hex-HexNAc-HexNAc+Hex
					2658	2651	1146.49	1145.99	2	2289.97	28.78	784.337	-	-	No	0	1	114.42	0	0	FALSE	-	2-3-0-0-0		Hex-(Hex-)Hex-HexNAc-HexNAc+Hex	Hex-(Hex-)Hex-HexNAc-(DeHex-)HexNAc+Hex
					2660	2651	916.645	916.392	4	3661.54	28.79	593.544	-	-	No	0	1	8.08	122.63	0	FALSE	-	4-4-0-1-0		NeuAc-Hex-HexNAc-(HexNAc-)Hex-(Hex-)Hex-HexNAc-HexNAc+Hex	NeuAc-Hex-HexNAc-Hex-(HexNAc-Hex-)Hex-HexNAc-HexNAc+Hex
					2663	2662	752.326	752.326	2	1502.64	28.81	565.31	-	-	No	0	1	110.9	0	0	FALSE	-	2-3-0-0-0		Hex-(Hex-)Hex-HexNAc-HexNAc+Hex
					2665	2662	852.351	851.69	3	2552.05	28.82	677.438	-	-	No	0	0.96	104.67	0	0	FALSE	-	2-3-0-0-0		Hex-(Hex-)Hex-HexNAc-HexNAc+Hex	Hex-(Hex-)Hex-HexNAc-(DeHex-)HexNAc+Hex
					2667	2662	698.31	697.979	3	2090.92	28.83	481.481	-	-	No	0	1	101.45	0	0	FALSE	-	2-3-0-0-0		Hex-(Hex-)Hex-HexNAc-HexNAc+Hex	Hex-(Hex-)Hex-HexNAc-(DeHex-)HexNAc+Hex
					2669	2662	1127.46	1126.96	2	2251.9	28.84	1109.31	-	-	No	0	1	167.23	0	0	FALSE	-	2-3-0-0-0		Hex-(Hex-)Hex-HexNAc-HexNAc+Hex	Hex-(Hex-)Hex-HexNAc-(DeHex-)HexNAc+Hex
					2671	2662	843.683	843.683	3	2528.03	28.85	758.659	-	-	No	0	1	217.74	0	-2	TRUE	-	2-5-0-0-0	0-2-0-0-0	Hex-(Hex-)Hex-HexNAc-HexNAc+HexNAc2
					2674	2673	901.429	900.927	2	1799.84	28.87	540.588	-	-	No	0	1	110.78	0	0	FALSE	-	2-3-0-0-0		Hex-(Hex-)Hex-HexNAc-HexNAc+Hex	Hex-(Hex-)Hex-HexNAc-(DeHex-)HexNAc+Hex
					2678	2673	756.388	756.055	3	2265.14	28.9	619.951	-	-	No	0	1	102.84	0	0	FALSE	-	2-3-0-0-0		Hex-(Hex-)Hex-HexNAc-HexNAc+Hex
					2680	2673	941.45	941.193	4	3760.74	28.91	684.815	-	-	No	0	1	100.74	0	0	FALSE	-	2-3-0-0-0		Hex-(Hex-)Hex-HexNAc-HexNAc+Hex
					2682	2673	961.426	961.091	3	2880.25	28.92	858.975	-	-	No	0	0.87	105.25	0	0	FALSE	-	2-3-0-0-0		Hex-(Hex-)Hex-HexNAc-HexNAc+Hex
					2685	2684	780.335	780.335	2	1558.65	28.94	464.582	-	-	No	0	1	113.02	0	0	FALSE	-	2-3-0-0-0		Hex-(Hex-)Hex-HexNAc-HexNAc+Hex
					2687	2684	801.33	801	3	2399.98	28.95	417.947	-	-	No	0	1	104.81	0	0	FALSE	-	2-3-1-0-0		Hex-(Hex-)Hex-HexNAc-(DeHex-)HexNAc+Hex	Hex-(Hex-)Hex-HexNAc-HexNAc+Hex
					2689	2684	663.319	663.319	3	1986.93	28.96	627.963	-	-	No	0	1	108.2	0	0	FALSE	-	2-3-0-0-0		Hex-(Hex-)Hex-HexNAc-HexNAc+Hex
					2691	2684	787.345	787.01	3	2358.01	28.97	406.931	-	-	No	0	1	1.09	112	0	FALSE	-	3-3-1-0-0		DeHex-HexNAc-Hex-(Hex-)Hex-HexNAc-HexNAc+Hex
					2693	2684	1092.76	1092.76	3	3275.27	28.98	373.45	-	-	No	0	1	0.71	298.35	0	FALSE	-	4-8-1-0-0		Hex-Hex-Hex-(Hex-HexNAc-)Hex-(Hex-HexNAc-Hex-)Hex-HexNAc-(DeHex-)HexNAc+Hex	Hex-Hex-(Hex-HexNAc-)Hex-(Hex-Hex-(HexNAc-)Hex-)Hex-HexNAc-(DeHex-)HexNAc+Hex	Hex-Hex-Hex-(Hex-Hex-)Hex-(HexNAc-(HexNAc-)Hex-)Hex-HexNAc-(DeHex-)HexNAc+Hex	Hex-Hex-Hex-Hex-(Hex-)Hex-(HexNAc-(HexNAc-)Hex-)Hex-HexNAc-(DeHex-)HexNAc+Hex	Hex-HexNAc-(HexNAc-)Hex-(Hex-Hex-Hex-Hex-Hex-)Hex-HexNAc-(DeHex-)HexNAc+Hex	Hex-HexNAc-(HexNAc-)Hex-(Hex-Hex-(Hex-Hex-)Hex-)Hex-HexNAc-(DeHex-)HexNAc+Hex	Hex-HexNAc-(HexNAc-)Hex-(Hex-Hex-Hex-(Hex-)Hex-)Hex-HexNAc-(DeHex-)HexNAc+Hex	Hex-Hex-Hex-Hex-(Hex-HexNAc-(Hex-HexNAc-)Hex-)Hex-HexNAc-(DeHex-)HexNAc+Hex	Hex-Hex-Hex-(Hex-HexNAc-)Hex-(HexNAc-(Hex-)Hex-)Hex-HexNAc-(DeHex-)HexNAc+Hex	Hex-Hex-(HexNAc-)Hex-(Hex-HexNAc-(Hex-Hex-)Hex-)Hex-HexNAc-(DeHex-)HexNAc+Hex	Hex-Hex-(Hex-HexNAc-)Hex-(HexNAc-(Hex-Hex-)Hex-)Hex-HexNAc-(DeHex-)HexNAc+Hex	Hex-Hex-(Hex-HexNAc-)Hex-(Hex-HexNAc-(Hex-)Hex-)Hex-HexNAc-(DeHex-)HexNAc+Hex	Hex-Hex-Hex-(HexNAc-)Hex-(HexNAc-(Hex-Hex-)Hex-)Hex-HexNAc-(DeHex-)HexNAc+Hex	Hex-Hex-Hex-(HexNAc-)Hex-(Hex-HexNAc-(Hex-)Hex-)Hex-HexNAc-(DeHex-)HexNAc+Hex	Hex-Hex-Hex-Hex-(HexNAc-)Hex-(Hex-HexNAc-Hex-)Hex-HexNAc-(DeHex-)HexNAc+Hex	Hex-Hex-Hex-Hex-(HexNAc-)Hex-(HexNAc-(Hex-)Hex-)Hex-HexNAc-(DeHex-)HexNAc+Hex	Hex-Hex-Hex-Hex-Hex-(HexNAc-)Hex-(HexNAc-Hex-)Hex-HexNAc-(DeHex-)HexNAc+Hex	Hex-HexNAc-(Hex-)Hex-(Hex-Hex-(Hex-HexNAc-)Hex-)Hex-HexNAc-(DeHex-)HexNAc+Hex	Hex-HexNAc-(Hex-)Hex-(Hex-Hex-Hex-(HexNAc-)Hex-)Hex-HexNAc-(DeHex-)HexNAc+Hex	Hex-HexNAc-(Hex-Hex-)Hex-(Hex-Hex-(HexNAc-)Hex-)Hex-HexNAc-(DeHex-)HexNAc+Hex	Hex-HexNAc-(Hex-)Hex-(Hex-HexNAc-(Hex-Hex-)Hex-)Hex-HexNAc-(DeHex-)HexNAc+Hex	Hex-HexNAc-(Hex-Hex-Hex-)Hex-(Hex-HexNAc-Hex-)Hex-HexNAc-(DeHex-)HexNAc+Hex	Hex-HexNAc-(Hex-HexNAc-)Hex-(Hex-Hex-Hex-Hex-)Hex-HexNAc-(DeHex-)HexNAc+Hex	Hex-HexNAc-(Hex-Hex-Hex-)Hex-(HexNAc-(Hex-)Hex-)Hex-HexNAc-(DeHex-)HexNAc+Hex	Hex-HexNAc-(Hex-Hex-)Hex-(Hex-HexNAc-(Hex-)Hex-)Hex-HexNAc-(DeHex-)HexNAc+Hex
					2696	2695	723.332	722.999	3	2165.97	29	687.777	-	-	No	0	1	0.77	0	0	FALSE	-	2-3-0-0-0		Hex-(Hex-)Hex-HexNAc-HexNAc+Hex	Hex-(Hex-)Hex-HexNAc-(DeHex-)HexNAc+Hex
					2700	2695	1013.5	1013	2	2023.97	29.03	523.227	-	-	No	0	1	105.1	0	0	FALSE	-	2-3-1-0-0		Hex-(Hex-)Hex-HexNAc-(DeHex-)HexNAc+Hex
					2702	2695	785.38	785.044	3	2352.11	29.04	750.505	-	-	No	0	1	104.66	0	0	FALSE	-	2-3-0-0-0		Hex-(Hex-)Hex-HexNAc-HexNAc+Hex
					2704	2695	834.089	833.756	3	2498.25	29.05	784.337	-	-	No	0	1	107.61	0	0	FALSE	-	2-3-1-0-0		Hex-(Hex-)Hex-HexNAc-(DeHex-)HexNAc+Hex	Hex-(Hex-)Hex-HexNAc-HexNAc+Hex
					2707	2706	650.295	650.295	3	1947.86	29.07	615.038	-	-	No	0	1	112.22	0	0	FALSE	-	2-3-1-0-0		Hex-(Hex-)Hex-HexNAc-(DeHex-)HexNAc+Hex	Hex-(Hex-)Hex-HexNAc-HexNAc+Hex
					2711	2706	703.336	703.003	3	2105.99	29.09	492.594	-	-	No	0	1	103.68	0	0	FALSE	-	2-3-1-0-0		Hex-(Hex-)Hex-HexNAc-(DeHex-)HexNAc+Hex
					2713	2706	1221.86	1221.54	3	3661.59	29.1	911.009	-	-	No	0	1	118.96	5.45	0	FALSE	-	2-4-0-0-0		Hex-(Hex-Hex-)Hex-HexNAc-HexNAc+Hex	Hex-Hex-(Hex-)Hex-HexNAc-HexNAc+Hex
					2715	2706	875.396	874.901	2	1747.79	29.11	933.455	-	-	No	0	1	78.88	0	0	FALSE	-	2-3-0-0-0		Hex-(Hex-)Hex-HexNAc-HexNAc+Hex
					2718	2717	670.329	670.077	4	2676.28	29.13	661.459	-	-	No	0	1	151.48	0	0	FALSE	-	2-3-0-0-0		Hex-(Hex-)Hex-HexNAc-HexNAc+Hex	Hex-(Hex-)Hex-HexNAc-(DeHex-)HexNAc+Hex
					2720	2717	678.794	678.794	2	1355.57	29.14	406.931	-	-	No	0	1	102.01	0	0	FALSE	-	2-3-0-0-0		Hex-(Hex-)Hex-HexNAc-HexNAc+Hex
					2722	2717	725.878	725.878	3	2174.61	29.15	689.574	-	-	No	0	1	119.25	0	0	FALSE	-	2-3-1-0-0		Hex-(Hex-)Hex-HexNAc-(DeHex-)HexNAc+Hex	Hex-(Hex-)Hex-HexNAc-HexNAc+Hex
					2724	2717	924.44	924.44	2	1846.87	29.16	1117.75	-	-	No	0	1	109.35	0	0	FALSE	-	2-3-0-0-0		Hex-(Hex-)Hex-HexNAc-HexNAc+Hex
					2726	2717	1254.59	1254.25	3	3759.74	29.17	853.693	-	-	No	0	1	2.2	100.25	0	FALSE	-	4-3-0-0-0		HexNAc-Hex-(HexNAc-Hex-)Hex-HexNAc-HexNAc+Hex	HexNAc-(HexNAc-)Hex-(Hex-)Hex-HexNAc-HexNAc+Hex
					2729	2728	709.358	709.358	3	2125.05	29.19	553.286	-	-	No	0	1	101.02	0	0	FALSE	-	2-3-1-0-0		Hex-(Hex-)Hex-HexNAc-(DeHex-)HexNAc+Hex	Hex-(Hex-)Hex-HexNAc-HexNAc+Hex
					2735	2728	980.956	980.457	2	1958.9	29.22	566.277	-	-	No	0	1	14.95	0	0	FALSE	-	2-3-0-0-0		Hex-(Hex-)Hex-HexNAc-HexNAc+Hex
					2737	2728	1054.5	1054	2	2105.99	29.23	1001.91	-	-	No	0	1	100.63	0	0	FALSE	-	2-3-1-0-0		Hex-(Hex-)Hex-HexNAc-(DeHex-)HexNAc+Hex	Hex-(Hex-)Hex-HexNAc-HexNAc+Hex
					2740	2739	675.666	675.666	3	2023.98	29.26	892.833	-	-	No	0	1	100.22	0	0	FALSE	-	2-3-0-0-0		Hex-(Hex-)Hex-HexNAc-HexNAc+Hex
					2742	2739	990.995	990.995	2	1979.98	29.27	713.531	-	-	No	0	1	103.06	0	0	FALSE	-	2-3-0-0-0		Hex-(Hex-)Hex-HexNAc-HexNAc+Hex
					2744	2739	977.131	976.795	3	2927.36	29.28	573.582	-	-	No	0	1	37.2	95.97	0	FALSE	-	3-4-0-0-0		HexNAc-Hex-(Hex-Hex-)Hex-HexNAc-HexNAc+Hex	Hex-HexNAc-Hex-(Hex-)Hex-HexNAc-HexNAc+Hex	HexNAc-(Hex-)Hex-(Hex-)Hex-HexNAc-HexNAc+Hex
					2746	2739	716.574	716.321	4	2861.26	29.29	659.335	-	-	No	0	1	102.21	0.37	0	FALSE	-	2-4-0-0-0		Hex-Hex-(Hex-)Hex-HexNAc-HexNAc+Hex	Hex-(Hex-Hex-)Hex-HexNAc-HexNAc+Hex
					2748	2739	819.377	819.377	2	1636.74	29.3	783.528	-	-	No	0	1	103.68	0	0	FALSE	-	2-3-0-0-0		Hex-(Hex-)Hex-HexNAc-HexNAc+Hex
					2751	2750	688.324	687.99	3	2060.95	29.32	678.92	-	-	No	0	1	112.96	0	0	FALSE	-	2-3-0-0-0		Hex-(Hex-)Hex-HexNAc-HexNAc+Hex
					2753	2750	1136.05	1135.55	2	2269.08	29.33	1061.94	-	-	No	0	1	33.4	0	0	FALSE	-	2-3-0-0-0		Hex-(Hex-)Hex-HexNAc-HexNAc+Hex
					2755	2750	1064.03	1063.53	2	2125.03	29.34	1011.41	-	-	No	0	1	100.39	0	0	FALSE	-	2-3-0-0-0		Hex-(Hex-)Hex-HexNAc-HexNAc+Hex
					2759	2750	793.397	792.9	2	1583.79	29.36	739.857	-	-	No	0	1	116.91	0	0	FALSE	-	2-3-0-0-0		Hex-(Hex-)Hex-HexNAc-HexNAc+Hex
					2762	2761	684.315	683.317	3	2046.93	29.38	580.007	-	-	No	0	1	103.65	0	0	FALSE	-	2-3-0-0-0		Hex-(Hex-)Hex-HexNAc-HexNAc+Hex	Hex-(Hex-)Hex-HexNAc-(DeHex-)HexNAc+Hex
					2764	2761	749.318	748.99	3	2243.95	29.4	737.994	-	-	No	0	1	140.18	0	0	FALSE	-	2-3-0-0-0		Hex-(Hex-)Hex-HexNAc-HexNAc+Hex	Hex-(Hex-)Hex-HexNAc-(DeHex-)HexNAc+Hex
					2766	2761	668.328	667.661	3	1999.96	29.4	789.215	-	-	No	0	1	155.7	0	0	FALSE	-	2-3-0-0-0		Hex-(Hex-)Hex-HexNAc-HexNAc+Hex
					2768	2761	986.464	986.129	3	2955.36	29.42	1309.63	-	-	No	0	1	102.48	0	0	FALSE	-	2-3-0-0-0		Hex-(Hex-)Hex-HexNAc-HexNAc+Hex
					2770	2761	692.063	691.813	4	2763.22	29.43	369.193	-	-	No	0	0.89	1.32	103.08	0	FALSE	-	3-4-2-1-0		NeuAc-Hex-(DeHex-)HexNAc-Hex-(Hex-)Hex-HexNAc-(DeHex-)HexNAc+Hex
					2773	2772	821.396	821.396	2	1640.78	29.44	612.635	-	-	No	0	1	22.41	0	0	FALSE	-	2-3-0-0-0		Hex-(Hex-)Hex-HexNAc-HexNAc+Hex
					2775	2772	856.392	855.393	2	1708.77	29.46	459.728	-	-	No	0	1	24.63	0	0	FALSE	-	2-3-0-0-0		Hex-(Hex-)Hex-HexNAc-HexNAc+Hex	Hex-(Hex-)Hex-HexNAc-(DeHex-)HexNAc+Hex
					2777	2772	946.393	945.89	2	1889.77	29.47	920.545	-	-	No	0	1	111.8	0	0	FALSE	-	2-3-1-0-0		Hex-(Hex-)Hex-HexNAc-(DeHex-)HexNAc+Hex	Hex-(Hex-)Hex-HexNAc-HexNAc+Hex
					2779	2772	1238.55	1238.05	2	2474.08	29.48	1274.71	-	-	No	0	1	117.02	0	-2	TRUE	-	3-4-1-0-0	1-1-0-0-0	Hex-(Hex-)Hex-HexNAc-(DeHex-)HexNAc+Hex1HexNAc1
					2781	2772	938.417	937.741	3	2810.2	29.49	605.985	-	-	No	0	1	0.68	100	0	FALSE	-	3-3-0-0-0		Hex-(HexNAc-Hex-)Hex-HexNAc-HexNAc+Hex	HexNAc-Hex-(Hex-)Hex-HexNAc-HexNAc+Hex
					2784	2783	1005.09	1004.75	3	3011.24	29.51	532.799	-	-	No	0	0.93	103.37	67.14	0	FALSE	-	4-4-0-1-0		NeuAc-Hex-HexNAc-Hex-(HexNAc-Hex-)Hex-HexNAc-HexNAc+Hex	NeuAc-Hex-HexNAc-(HexNAc-)Hex-(Hex-)Hex-HexNAc-HexNAc+Hex
					2786	2783	883.128	882.795	3	2645.36	29.52	849.122	-	-	No	0	1	112.16	0	0	FALSE	-	2-3-0-0-0		Hex-(Hex-)Hex-HexNAc-HexNAc+Hex
					2788	2783	869.013	868.009	3	2601	29.53	798.386	-	-	No	0	1	101.07	0	0	FALSE	-	2-3-0-0-0		Hex-(Hex-)Hex-HexNAc-HexNAc+Hex
					2790	2783	908.398	908.066	3	2721.18	29.55	579.289	-	-	No	1	0.61	13.12	119.33	0	FALSE	-	3-5-1-0-0		DeHex-HexNAc-Hex-(Hex-(Hex-)Hex-)Hex-HexNAc-HexNAc+Hex	DeHex-HexNAc-(Hex-)Hex-(Hex-Hex-)Hex-HexNAc-HexNAc+Hex	DeHex-HexNAc-(Hex-Hex-)Hex-(Hex-)Hex-HexNAc-HexNAc+Hex	DeHex-HexNAc-Hex-(Hex-Hex-Hex-)Hex-HexNAc-HexNAc+Hex
					2792	2783	933.356	933.356	3	2797.05	29.56	544.242	-	-	No	0	1	3.06	110.32	0	FALSE	-	3-4-0-0-0		HexNAc-(Hex-)Hex-(Hex-)Hex-HexNAc-HexNAc+Hex	Hex-HexNAc-Hex-(Hex-)Hex-HexNAc-HexNAc+Hex	HexNAc-Hex-(Hex-Hex-)Hex-HexNAc-HexNAc+Hex
					2795	2794	718.657	718.322	3	2151.94	29.58	683.795	-	-	No	0	1	101.82	0	0	FALSE	-	2-3-1-0-0		Hex-(Hex-)Hex-HexNAc-(DeHex-)HexNAc+Hex	Hex-(Hex-)Hex-HexNAc-HexNAc+Hex
					2797	2794	729.335	729.335	2	1456.65	29.6	693.832	-	-	No	0	1	103.34	0	0	FALSE	-	2-3-0-0-0		Hex-(Hex-)Hex-HexNAc-HexNAc+Hex
					2801	2794	712.02	711.685	3	2132.03	29.62	677.113	-	-	No	0	1	101.45	0	0	FALSE	-	2-3-0-0-0		Hex-(Hex-)Hex-HexNAc-HexNAc+Hex
					2806	2805	652.321	652.321	3	1953.94	29.65	617.817	-	-	No	0	1	102.3	0	0	FALSE	-	2-3-0-0-0		Hex-(Hex-)Hex-HexNAc-HexNAc+Hex
					2808	2805	815.342	815.012	3	2442.01	29.66	428.874	-	-	No	0	1	5.74	102.72	0	FALSE	-	3-4-0-0-0		Hex-Hex-(HexNAc-Hex-)Hex-HexNAc-HexNAc+Hex
					2810	2805	1052.42	1052.42	2	2102.83	29.67	975.827	-	-	No	0	1	113.5	0	0	FALSE	-	2-3-0-0-0		Hex-(Hex-)Hex-HexNAc-HexNAc+Hex	Hex-(Hex-)Hex-HexNAc-(DeHex-)HexNAc+Hex
					2812	2805	795.402	795.069	3	2382.18	29.68	762.711	-	-	No	0	1	117.94	0	0	FALSE	-	2-3-0-0-0		Hex-(Hex-)Hex-HexNAc-HexNAc+Hex	Hex-(Hex-)Hex-HexNAc-(DeHex-)HexNAc+Hex
					2814	2805	1047.41	1046.9	2	2091.79	29.69	994.752	-	-	No	0	1	101.19	0	0	FALSE	-	2-3-0-0-0		Hex-(Hex-)Hex-HexNAc-HexNAc+Hex
					2817	2816	656.29	655.957	3	1964.85	29.72	497.598	-	-	No	0	1	109.22	0	0	FALSE	-	2-3-1-0-0		Hex-(Hex-)Hex-HexNAc-(DeHex-)HexNAc+Hex	Hex-(Hex-)Hex-HexNAc-HexNAc+Hex
					2819	2816	776.835	776.337	2	1550.66	29.73	631.084	-	-	No	0	1	136.54	0	0	FALSE	-	2-3-0-0-0		Hex-(Hex-)Hex-HexNAc-HexNAc+Hex
					2823	2816	983.433	983.433	2	1964.85	29.75	859.87	-	-	No	0	1	107.72	0	0	FALSE	-	2-3-0-0-0		Hex-(Hex-)Hex-HexNAc-HexNAc+Hex
					2825	2816	956.496	955.989	2	1909.96	29.76	564.313	-	-	No	0	1	62.25	0	0	FALSE	-	2-3-0-0-0		Hex-(Hex-)Hex-HexNAc-HexNAc+Hex
					2828	2827	885.43	885.096	3	2652.26	29.78	666.631	-	-	No	0	1	149.54	0	0	FALSE	-	2-3-0-0-0		Hex-(Hex-)Hex-HexNAc-HexNAc+Hex
					2830	2827	1315.55	1315.3	4	5257.19	29.79	1104.17	-	-	No	0	1	5.08	128.27	0	FALSE	-	4-6-1-0-0		Hex-HexNAc-Hex-HexNAc-Hex-(Hex-Hex-)Hex-HexNAc-(DeHex-)HexNAc+Hex
					2832	2827	836.298	835.633	3	2503.88	29.81	817.595	-	-	No	0	1	111.07	0	0	FALSE	-	2-3-1-0-0		Hex-(Hex-)Hex-HexNAc-(DeHex-)HexNAc+Hex
					2834	2827	971.482	970.98	2	1939.94	29.82	918.84	-	-	No	0	1	104.39	0	0	FALSE	-	2-3-0-0-0		Hex-(Hex-)Hex-HexNAc-HexNAc+Hex
					2836	2827	1040.51	1040.51	2	2079	29.83	832.82	-	-	No	0	1	108.28	0	0	FALSE	-	2-3-1-0-0		Hex-(Hex-)Hex-HexNAc-(DeHex-)HexNAc+Hex	Hex-(Hex-)Hex-HexNAc-HexNAc+Hex
					2839	2838	700.017	700.017	4	2796.04	29.85	544.242	-	-	No	0	1	70.46	96.76	0	FALSE	-	3-4-0-0-0		Hex-HexNAc-Hex-(Hex-)Hex-HexNAc-HexNAc+Hex	HexNAc-Hex-(Hex-Hex-)Hex-HexNAc-HexNAc+Hex	HexNAc-(Hex-)Hex-(Hex-)Hex-HexNAc-HexNAc+Hex
					2841	2838	812.439	812.439	2	1622.86	29.87	760.186	-	-	No	0	1	70.63	0	0	FALSE	-	2-3-0-0-0		Hex-(Hex-)Hex-HexNAc-HexNAc+Hex
					2843	2838	877.769	877.769	3	2630.29	29.88	480.229	-	-	No	0	1	102.76	0	0	FALSE	-	2-3-0-0-0		Hex-(Hex-)Hex-HexNAc-HexNAc+Hex
					2847	2838	862.357	862.112	4	3444.42	29.9	544.242	-	-	No	0	1	2.28	104.06	0	FALSE	-	2-6-0-0-0		Hex-Hex-Hex-Hex-(Hex-)Hex-HexNAc-HexNAc+Hex	Hex-Hex-Hex-(Hex-Hex-)Hex-HexNAc-HexNAc+Hex	Hex-Hex-(Hex-Hex-Hex-)Hex-HexNAc-HexNAc+Hex
					2850	2849	811.357	810.688	3	2429.04	29.92	492.594	-	-	No	0	1	1.1	100	0	FALSE	-	2-4-0-0-0		Hex-(Hex-Hex-)Hex-HexNAc-HexNAc+Hex	Hex-Hex-(Hex-)Hex-HexNAc-HexNAc+Hex
					2852	2849	759.001	759.001	3	2273.98	29.93	722.918	-	-	No	0	1	25.12	0	0	FALSE	-	2-3-0-0-0		Hex-(Hex-)Hex-HexNAc-HexNAc+Hex
					2854	2849	993.953	993.458	2	1984.9	29.94	669.044	-	-	No	0	1	66.48	0	0	FALSE	-	2-3-0-0-0		Hex-(Hex-)Hex-HexNAc-HexNAc+Hex
					2856	2849	667.974	667.304	3	1998.89	29.95	632.241	-	-	No	0	1	112.99	0	0	FALSE	-	2-3-0-0-0		Hex-(Hex-)Hex-HexNAc-HexNAc+Hex
					2858	2849	1413.06	1412.56	2	2823.11	29.96	1041.68	-	-	No	0	1	129.78	10.04	0	FALSE	-	2-4-0-0-0		Hex-(Hex-Hex-)Hex-HexNAc-HexNAc+Hex	Hex-Hex-(Hex-)Hex-HexNAc-HexNAc+Hex
					2861	2860	659.981	659.647	3	1975.92	29.99	456.879	-	-	No	0	1	103.99	0	0	FALSE	-	2-3-0-0-0		Hex-(Hex-)Hex-HexNAc-HexNAc+Hex
					2863	2860	840.333	839.994	3	2516.96	30	544.242	-	-	No	0	1	114.84	29.5	0	FALSE	-	3-4-1-0-0		Hex-Hex-(HexNAc-Hex-)Hex-HexNAc-(DeHex-)HexNAc+Hex
					2865	2860	898.11	897.776	3	2690.31	30.01	842.238	-	-	No	0	1	107.97	0	0	FALSE	-	2-3-0-0-0		Hex-(Hex-)Hex-HexNAc-HexNAc+Hex
					2867	2860	1018.47	1018.47	3	3052.38	30.02	331.172	-	-	No	0	1	5.6	131.69	0	FALSE	-	5-3-0-0-0		HexNAc-(HexNAc-)Hex-(HexNAc-Hex-)Hex-HexNAc-HexNAc+Hex	HexNAc-Hex-(HexNAc-(HexNAc-)Hex-)Hex-HexNAc-HexNAc+Hex
					2869	2860	1035.44	1035.44	3	3103.31	30.03	403.454	-	-	No	0	0.97	1.01	103.35	0	FALSE	-	3-5-0-0-0		Hex-Hex-(Hex-HexNAc-Hex-)Hex-HexNAc-HexNAc+Hex	Hex-(Hex-)Hex-(HexNAc-Hex-)Hex-HexNAc-HexNAc+Hex	Hex-Hex-Hex-(HexNAc-Hex-)Hex-HexNAc-HexNAc+Hex	Hex-Hex-(HexNAc-(Hex-)Hex-)Hex-HexNAc-HexNAc+Hex
					2872	2871	707.334	707.334	3	2118.98	30.06	630.604	-	-	No	0	1	112.02	0	0	FALSE	-	2-3-1-0-0		Hex-(Hex-)Hex-HexNAc-(DeHex-)HexNAc+Hex
					2874	2871	848.39	848.056	3	2541.15	30.07	813.561	-	-	No	0	1	100.26	0.02	0	FALSE	-	3-3-0-0-0		Hex-(HexNAc-Hex-)Hex-HexNAc-HexNAc+Hex	HexNAc-Hex-(Hex-)Hex-HexNAc-HexNAc+Hex
					2876	2871	745.352	745.352	2	1488.69	30.08	602.403	-	-	No	0	1	115	0	0	FALSE	-	2-3-0-0-0		Hex-(Hex-)Hex-HexNAc-HexNAc+Hex	Hex-(Hex-)Hex-HexNAc-(DeHex-)HexNAc+Hex
					2878	2871	766.329	766.001	3	2294.98	30.09	696.513	-	-	No	0	1	137.52	0	0	FALSE	-	2-3-1-0-0		Hex-(Hex-)Hex-HexNAc-(DeHex-)HexNAc+Hex
					2880	2871	1002.96	1002.96	2	2003.91	30.1	1274.75	-	-	No	0	1	108.32	0	0	FALSE	-	2-3-0-0-0		Hex-(Hex-)Hex-HexNAc-HexNAc+Hex
					2883	2882	745.354	745.354	2	1488.69	30.12	757.383	-	-	No	0	1	88.65	0	0	FALSE	-	2-3-0-0-0		Hex-(Hex-)Hex-HexNAc-HexNAc+Hex
					2885	2882	680.967	680.967	3	2039.88	30.13	544.242	-	-	No	0	1	101.54	0	0	FALSE	-	2-3-0-0-0		Hex-(Hex-)Hex-HexNAc-HexNAc+Hex	Hex-(Hex-)Hex-HexNAc-(DeHex-)HexNAc+Hex
					2887	2882	716.34	716.01	3	2145.01	30.14	659.342	-	-	No	0	1	102.13	0	0	FALSE	-	2-3-1-0-0		Hex-(Hex-)Hex-HexNAc-(DeHex-)HexNAc+Hex	Hex-(Hex-)Hex-HexNAc-HexNAc+Hex
					2889	2882	1038	1038	2	2073.98	30.15	1393.74	-	-	No	0	1	102.3	0	0	FALSE	-	2-3-0-0-0		Hex-(Hex-)Hex-HexNAc-HexNAc+Hex
					2891	2882	1076.5	1076.01	2	2150	30.16	739.7	-	-	No	0	1	126.25	0	0	FALSE	-	2-3-1-0-0		Hex-(Hex-)Hex-HexNAc-(DeHex-)HexNAc+Hex	Hex-(Hex-)Hex-HexNAc-HexNAc+Hex
					2894	2893	685.607	685.607	3	2053.8	30.18	673.992	-	-	No	0	1	113.28	0	0	FALSE	-	2-3-0-0-0		Hex-(Hex-)Hex-HexNAc-HexNAc+Hex
					2896	2893	1021.45	1020.95	2	2039.88	30.19	968.834	-	-	No	0	1	100.32	0	0	FALSE	-	2-3-1-0-0		Hex-(Hex-)Hex-HexNAc-(DeHex-)HexNAc+Hex	Hex-(Hex-)Hex-HexNAc-HexNAc+Hex
					2898	2893	783.39	783.059	3	2346.16	30.21	700.305	-	-	No	0	1	69.48	0	0	FALSE	-	2-3-0-0-0		Hex-(Hex-)Hex-HexNAc-HexNAc+Hex
					2900	2893	905.885	905.386	2	1808.76	30.22	852.287	-	-	No	0	1	120.62	0	0	FALSE	-	2-3-0-0-0		Hex-(Hex-)Hex-HexNAc-HexNAc+Hex
					2902	2893	805.837	805.837	2	1609.66	30.23	770.979	-	-	No	0	1	104.17	0	0	FALSE	-	2-3-0-0-0		Hex-(Hex-)Hex-HexNAc-HexNAc+Hex
					2905	2904	732.313	731.652	3	2191.93	30.25	697.467	-	-	No	0	1	100.77	0	0	FALSE	-	2-3-0-0-0		Hex-(Hex-)Hex-HexNAc-HexNAc+Hex
					2907	2904	989.477	988.968	2	1975.92	30.26	957.391	-	-	No	0	1	100.81	0	0	FALSE	-	2-3-0-0-0		Hex-(Hex-)Hex-HexNAc-HexNAc+Hex
					2909	2904	870.362	869.865	2	1737.71	30.27	834.806	-	-	No	0	1	102.78	0	0	FALSE	-	2-3-0-0-0		Hex-(Hex-)Hex-HexNAc-HexNAc+Hex
					2911	2904	1216.03	1215.53	2	2429.05	30.28	1163.38	-	-	No	0	1	100.75	0	0	FALSE	-	2-3-0-0-0		Hex-(Hex-)Hex-HexNAc-HexNAc+Hex
					2913	2904	826.914	826.914	2	1651.81	30.29	766.255	-	-	No	0	1	104.91	0	0	FALSE	-	2-3-0-0-0		Hex-(Hex-)Hex-HexNAc-HexNAc+Hex	Hex-(Hex-)Hex-HexNAc-(DeHex-)HexNAc+Hex
					2916	2915	1002.97	1002.97	2	2003.92	30.31	1274.77	-	-	No	0	1	108.36	0	0	FALSE	-	2-3-0-0-0		Hex-(Hex-)Hex-HexNAc-HexNAc+Hex
					2918	2915	916.105	915.772	3	2744.29	30.33	1131.46	-	-	No	0	1	103	0	0	FALSE	-	2-3-0-0-0		Hex-(Hex-)Hex-HexNAc-HexNAc+Hex
					2920	2915	751.606	751.358	4	3001.4	30.34	636.601	-	-	No	0	1	169.27	0	0	FALSE	-	2-3-1-0-0		Hex-(Hex-)Hex-HexNAc-(DeHex-)HexNAc+Hex
					2924	2915	663.314	663.314	3	1986.92	30.36	696.369	-	-	No	0	1	108.44	0	0	FALSE	-	2-3-0-0-0		Hex-(Hex-)Hex-HexNAc-HexNAc+Hex
					2927	2926	799.353	799.353	2	1596.69	30.37	781.502	-	-	No	0	1	105.74	0	0	FALSE	-	2-3-0-0-0		Hex-(Hex-)Hex-HexNAc-HexNAc+Hex	Hex-(Hex-)Hex-HexNAc-(DeHex-)HexNAc+Hex
					2929	2926	657.617	657.617	3	1969.83	30.39	374.862	-	-	No	0	1	100.93	0	0	FALSE	-	2-3-0-0-0		Hex-(Hex-)Hex-HexNAc-HexNAc+Hex
					2931	2926	1023.42	1022.92	2	2043.82	30.4	1096.18	-	-	No	0	1	102.57	0	0	FALSE	-	2-3-0-0-0		Hex-(Hex-)Hex-HexNAc-HexNAc+Hex
					2933	2926	770.373	770.373	2	1538.73	30.41	718.194	-	-	No	0	1	104.25	0	0	FALSE	-	2-3-0-0-0		Hex-(Hex-)Hex-HexNAc-HexNAc+Hex
					2935	2926	775.012	774.674	3	2321	30.42	740.201	-	-	No	0	0.93	100.96	0	0	FALSE	-	2-3-0-0-0		Hex-(Hex-)Hex-HexNAc-HexNAc+Hex
					2938	2937	893.756	893.421	3	2677.24	30.43	734.423	-	-	No	0	1	157.22	0	0	FALSE	-	2-3-0-0-0		Hex-(Hex-)Hex-HexNAc-HexNAc+Hex
					2940	2937	739.377	739.377	4	2953.48	30.45	529.276	-	-	No	0	1	111.89	0	0	FALSE	-	2-3-1-0-0		Hex-(Hex-)Hex-HexNAc-(DeHex-)HexNAc+Hex	Hex-(Hex-)Hex-HexNAc-HexNAc+Hex
					2942	2937	888.022	888.022	3	2661.05	30.46	265.142	-	-	No	0	1	20.46	224.05	0	FALSE	-	5-5-1-0-1		NeuGc-Hex-HexNAc-(HexNAc-)Hex-(Hex-(HexNAc-)Hex-)Hex-HexNAc-(DeHex-)HexNAc+Hex	NeuGc-Hex-HexNAc-(Hex-)Hex-(HexNAc-(HexNAc-)Hex-)Hex-HexNAc-(DeHex-)HexNAc+Hex
					2944	2937	931.446	931.113	3	2790.32	30.47	897.114	-	-	No	0	1	113.95	0	0	FALSE	-	2-3-1-0-0		Hex-(Hex-)Hex-HexNAc-(DeHex-)HexNAc+Hex	Hex-(Hex-)Hex-HexNAc-HexNAc+Hex
					2946	2937	737.012	736.677	3	2207.01	30.48	667.52	-	-	No	0	1	125.71	0	0	FALSE	-	2-3-1-0-0		Hex-(Hex-)Hex-HexNAc-(DeHex-)HexNAc+Hex
					2949	2948	1250.5	1250.5	2	2498.99	30.5	1041.72	-	-	No	0	1	144.26	0	0	FALSE	-	2-3-0-0-0		Hex-(Hex-)Hex-HexNAc-HexNAc+Hex
					2951	2948	781.343	781.343	4	3121.34	30.51	556.927	-	-	No	0	0.85	123.2	17.98	0	FALSE	-	2-4-0-0-0		Hex-(Hex-Hex-)Hex-HexNAc-HexNAc+Hex	Hex-Hex-(Hex-)Hex-HexNAc-HexNAc+Hex
					2953	2948	844.907	844.404	2	1686.79	30.52	792.237	-	-	No	0	1	100.85	0	0	FALSE	-	2-3-0-0-0		Hex-(Hex-)Hex-HexNAc-HexNAc+Hex
					2955	2948	1093.52	1093.52	2	2185.03	30.53	1426.06	-	-	No	0	1	102.48	0	0	FALSE	-	2-3-1-0-0		Hex-(Hex-)Hex-HexNAc-(DeHex-)HexNAc+Hex	Hex-(Hex-)Hex-HexNAc-HexNAc+Hex
					2957	2948	1332.04	1331.53	2	2661.05	30.54	1041.71	-	-	No	0	1	160.19	3.32	0	FALSE	-	2-4-0-0-0		Hex-(Hex-Hex-)Hex-HexNAc-HexNAc+Hex	Hex-Hex-(Hex-)Hex-HexNAc-HexNAc+Hex
					2960	2959	832.663	832.329	3	2493.96	30.56	1051.5	-	-	No	0	1	133.26	0	0	FALSE	-	2-3-0-0-0		Hex-(Hex-)Hex-HexNAc-HexNAc+Hex
					2962	2959	703.977	703.643	3	2107.91	30.57	669.185	-	-	No	0	1	100.95	0	0	FALSE	-	2-3-0-0-0		Hex-(Hex-)Hex-HexNAc-HexNAc+Hex	Hex-(Hex-)Hex-HexNAc-(DeHex-)HexNAc+Hex
					2964	2959	828.878	828.878	2	1655.74	30.58	765.139	-	-	No	0	1	107.5	0	0	FALSE	-	2-3-0-0-0		Hex-(Hex-)Hex-HexNAc-HexNAc+Hex
					2966	2959	880.946	880.742	5	4398.67	30.59	1267.96	-	-	No	0	1	101.25	0	0	FALSE	-	2-3-0-0-0		Hex-(Hex-)Hex-HexNAc-HexNAc+Hex
					2968	2959	764.034	764.034	3	2289.08	30.61	729.372	-	-	No	0	1	101.67	0	0	FALSE	-	2-3-1-0-0		Hex-(Hex-)Hex-HexNAc-(DeHex-)HexNAc+Hex
					2971	2970	1149.46	1148.96	2	2295.91	30.62	1041.62	-	-	No	0	1	138.08	0	0	FALSE	-	2-3-0-0-0		Hex-(Hex-)Hex-HexNAc-HexNAc+Hex
					2975	2970	1010.74	1010.74	3	3029.18	30.65	683.508	-	-	No	0	1	19.91	123.65	-1	TRUE	-	6-4-0-0-0	1-0-0-0-0	Hex-(HexNAc-)Hex-(HexNAc-(HexNAc-)Hex-)Hex-HexNAc-HexNAc+Hex1	Hex-HexNAc-Hex-(HexNAc-(HexNAc-)Hex-)Hex-HexNAc-HexNAc+Hex1	HexNAc-Hex-HexNAc-Hex-(HexNAc-Hex-)Hex-HexNAc-HexNAc+Hex1	Hex-HexNAc-(HexNAc-)Hex-(HexNAc-Hex-)Hex-HexNAc-HexNAc+Hex1	HexNAc-Hex-HexNAc-(HexNAc-)Hex-(Hex-)Hex-HexNAc-HexNAc+Hex1	HexNAc-(Hex-)Hex-(HexNAc-(HexNAc-)Hex-)Hex-HexNAc-HexNAc+Hex1	HexNAc-(HexNAc-)Hex-(Hex-(HexNAc-)Hex-)Hex-HexNAc-HexNAc+Hex1
					2979	2970	1554.13	1553.64	2	3105.26	30.67	1241.78	-	-	No	0	1	117.31	0	0	FALSE	-	2-3-0-0-0		Hex-(Hex-)Hex-HexNAc-HexNAc+Hex
					2982	2981	785.907	784.905	2	1567.8	30.69	733.749	-	-	No	0	1	100.65	0	0	FALSE	-	2-3-0-0-0		Hex-(Hex-)Hex-HexNAc-HexNAc+Hex
					2984	2981	741.674	741.341	3	2221	30.7	706.418	-	-	No	0	1	103.7	0	0	FALSE	-	2-3-0-0-0		Hex-(Hex-)Hex-HexNAc-HexNAc+Hex	Hex-(Hex-)Hex-HexNAc-(DeHex-)HexNAc+Hex
					2986	2981	851.409	851.409	2	1700.8	30.71	1111.92	-	-	No	0	1	129.91	0	0	FALSE	-	2-3-0-0-0		Hex-(Hex-)Hex-HexNAc-HexNAc+Hex	Hex-(Hex-)Hex-HexNAc-(DeHex-)HexNAc+Hex
					2988	2981	948.447	947.941	4	3787.74	30.72	500.722	-	-	No	0	1	2.02	104.17	0	FALSE	-	3-7-1-0-0		Hex-HexNAc-Hex-Hex-(Hex-)Hex-(Hex-)Hex-HexNAc-(DeHex-)HexNAc+Hex	HexNAc-Hex-Hex-(Hex-)Hex-(Hex-Hex-)Hex-HexNAc-(DeHex-)HexNAc+Hex	Hex-HexNAc-Hex-Hex-Hex-(Hex-Hex-)Hex-HexNAc-(DeHex-)HexNAc+Hex	HexNAc-Hex-Hex-Hex-(Hex-(Hex-)Hex-)Hex-HexNAc-(DeHex-)HexNAc+Hex	HexNAc-Hex-Hex-Hex-(Hex-Hex-Hex-)Hex-HexNAc-(DeHex-)HexNAc+Hex	HexNAc-Hex-Hex-(Hex-Hex-)Hex-(Hex-)Hex-HexNAc-(DeHex-)HexNAc+Hex	Hex-Hex-Hex-(Hex-)Hex-(HexNAc-Hex-)Hex-HexNAc-(DeHex-)HexNAc+Hex	Hex-Hex-Hex-(Hex-HexNAc-(Hex-)Hex-)Hex-HexNAc-(DeHex-)HexNAc+Hex	Hex-Hex-(Hex-Hex-)Hex-(HexNAc-Hex-)Hex-HexNAc-(DeHex-)HexNAc+Hex	Hex-Hex-Hex-Hex-(HexNAc-(Hex-)Hex-)Hex-HexNAc-(DeHex-)HexNAc+Hex	Hex-Hex-Hex-Hex-Hex-(HexNAc-Hex-)Hex-HexNAc-(DeHex-)HexNAc+Hex	Hex-Hex-(Hex-)Hex-(Hex-HexNAc-Hex-)Hex-HexNAc-(DeHex-)HexNAc+Hex	Hex-Hex-(Hex-)Hex-(HexNAc-(Hex-)Hex-)Hex-HexNAc-(DeHex-)HexNAc+Hex	Hex-Hex-Hex-(HexNAc-(Hex-Hex-)Hex-)Hex-HexNAc-(DeHex-)HexNAc+Hex	Hex-Hex-Hex-Hex-(Hex-HexNAc-Hex-)Hex-HexNAc-(DeHex-)HexNAc+Hex
					2990	2981	1100.93	1100.43	4	4397.68	30.73	584.29	-	-	No	0	0.63	15.97	188.8	0	FALSE	-	5-6-1-0-0		Hex-HexNAc-(Hex-)Hex-(Hex-HexNAc-(HexNAc-)Hex-)Hex-HexNAc-(DeHex-)HexNAc+Hex	Hex-Hex-(HexNAc-)Hex-(HexNAc-(Hex-HexNAc-)Hex-)Hex-HexNAc-(DeHex-)HexNAc+Hex	Hex-HexNAc-(Hex-HexNAc-)Hex-(Hex-HexNAc-Hex-)Hex-HexNAc-(DeHex-)HexNAc+Hex	Hex-HexNAc-(HexNAc-)Hex-(Hex-HexNAc-(Hex-)Hex-)Hex-HexNAc-(DeHex-)HexNAc+Hex	Hex-HexNAc-(HexNAc-)Hex-(HexNAc-(Hex-Hex-)Hex-)Hex-HexNAc-(DeHex-)HexNAc+Hex	Hex-HexNAc-(Hex-Hex-)Hex-(HexNAc-(HexNAc-)Hex-)Hex-HexNAc-(DeHex-)HexNAc+Hex	Hex-HexNAc-(Hex-HexNAc-)Hex-(HexNAc-(Hex-)Hex-)Hex-HexNAc-(DeHex-)HexNAc+Hex	Hex-Hex-(HexNAc-)Hex-(Hex-HexNAc-(HexNAc-)Hex-)Hex-HexNAc-(DeHex-)HexNAc+Hex	Hex-Hex-(Hex-HexNAc-)Hex-(HexNAc-(HexNAc-)Hex-)Hex-HexNAc-(DeHex-)HexNAc+Hex	Hex-Hex-Hex-(HexNAc-)Hex-(HexNAc-(HexNAc-)Hex-)Hex-HexNAc-(DeHex-)HexNAc+Hex	Hex-HexNAc-(Hex-)Hex-(HexNAc-(Hex-HexNAc-)Hex-)Hex-HexNAc-(DeHex-)HexNAc+Hex
					2993	2992	754.032	753.699	3	2258.07	30.75	579.289	-	-	No	0	1	117.11	0	0	FALSE	-	2-3-0-0-0		Hex-(Hex-)Hex-HexNAc-HexNAc+Hex
					2995	2992	808.769	808.568	5	4037.8	30.76	558.927	-	-	No	0	1	28.29	205.94	0	FALSE	-	4-4-1-0-0		Hex-HexNAc-Hex-(HexNAc-Hex-)Hex-HexNAc-(DeHex-)HexNAc+Hex	HexNAc-Hex-HexNAc-Hex-(Hex-)Hex-HexNAc-(DeHex-)HexNAc+Hex	HexNAc-(Hex-)Hex-(HexNAc-Hex-)Hex-HexNAc-(DeHex-)HexNAc+Hex	Hex-HexNAc-(HexNAc-)Hex-(Hex-)Hex-HexNAc-(DeHex-)HexNAc+Hex
					2997	2992	803.373	803.037	3	2406.09	30.77	732.125	-	-	No	0	1	130.99	0	0	FALSE	-	2-3-0-0-0		Hex-(Hex-)Hex-HexNAc-HexNAc+Hex	Hex-(Hex-)Hex-HexNAc-(DeHex-)HexNAc+Hex
					2999	2992	1060.09	1059.42	3	3175.23	30.78	944.189	-	-	No	0	1	100.88	0	0	FALSE	-	2-3-1-0-0		Hex-(Hex-)Hex-HexNAc-(DeHex-)HexNAc+Hex	Hex-(Hex-)Hex-HexNAc-HexNAc+Hex
					3001	2992	1559	1558.32	3	4671.95	30.79	1116.36	-	-	No	0	1	64.16	227.06	-3	TRUE	-	6-6-1-0-1	2-0-0-0-1	Hex-(Hex-HexNAc-)Hex-(Hex-HexNAc-Hex-)Hex-HexNAc-(DeHex-)HexNAc+Hex2NeuGc1	HexNAc-Hex-HexNAc-(Hex-)Hex-(Hex-Hex-)Hex-HexNAc-(DeHex-)HexNAc+Hex2NeuGc1	HexNAc-(Hex-HexNAc-)Hex-(Hex-(Hex-)Hex-)Hex-HexNAc-(DeHex-)HexNAc+Hex2NeuGc1	Hex-HexNAc-Hex-HexNAc-Hex-(Hex-Hex-)Hex-HexNAc-(DeHex-)HexNAc+Hex2NeuGc1	HexNAc-Hex-HexNAc-Hex-(Hex-(Hex-)Hex-)Hex-HexNAc-(DeHex-)HexNAc+Hex2NeuGc1	HexNAc-Hex-HexNAc-Hex-(Hex-Hex-Hex-)Hex-HexNAc-(DeHex-)HexNAc+Hex2NeuGc1	Hex-HexNAc-Hex-(Hex-HexNAc-(Hex-)Hex-)Hex-HexNAc-(DeHex-)HexNAc+Hex2NeuGc1	Hex-HexNAc-Hex-(HexNAc-(Hex-Hex-)Hex-)Hex-HexNAc-(DeHex-)HexNAc+Hex2NeuGc1	Hex-(Hex-HexNAc-)Hex-(HexNAc-(Hex-)Hex-)Hex-HexNAc-(DeHex-)HexNAc+Hex2NeuGc1	HexNAc-(HexNAc-)Hex-(Hex-(Hex-Hex-)Hex-)Hex-HexNAc-(DeHex-)HexNAc+Hex2NeuGc1	HexNAc-(Hex-HexNAc-)Hex-(Hex-Hex-Hex-)Hex-HexNAc-(DeHex-)HexNAc+Hex2NeuGc1	HexNAc-(HexNAc-)Hex-(Hex-Hex-Hex-Hex-)Hex-HexNAc-(DeHex-)HexNAc+Hex2NeuGc1	Hex-(HexNAc-)Hex-(Hex-HexNAc-(Hex-)Hex-)Hex-HexNAc-(DeHex-)HexNAc+Hex2NeuGc1	Hex-HexNAc-Hex-HexNAc-(Hex-)Hex-(Hex-)Hex-HexNAc-(DeHex-)HexNAc+Hex2NeuGc1	HexNAc-Hex-HexNAc-(Hex-Hex-)Hex-(Hex-)Hex-HexNAc-(DeHex-)HexNAc+Hex2NeuGc1	HexNAc-(HexNAc-)Hex-(Hex-Hex-(Hex-)Hex-)Hex-HexNAc-(DeHex-)HexNAc+Hex2NeuGc1	Hex-HexNAc-(HexNAc-)Hex-(Hex-Hex-Hex-)Hex-HexNAc-(DeHex-)HexNAc+Hex2NeuGc1	Hex-(HexNAc-)Hex-(HexNAc-(Hex-Hex-)Hex-)Hex-HexNAc-(DeHex-)HexNAc+Hex2NeuGc1	Hex-HexNAc-(Hex-)Hex-(HexNAc-(Hex-)Hex-)Hex-HexNAc-(DeHex-)HexNAc+Hex2NeuGc1	Hex-HexNAc-(Hex-)Hex-(Hex-HexNAc-Hex-)Hex-HexNAc-(DeHex-)HexNAc+Hex2NeuGc1	Hex-Hex-Hex-(HexNAc-)Hex-(HexNAc-Hex-)Hex-HexNAc-(DeHex-)HexNAc+Hex2NeuGc1	Hex-Hex-(Hex-HexNAc-)Hex-(HexNAc-Hex-)Hex-HexNAc-(DeHex-)HexNAc+Hex2NeuGc1	Hex-Hex-(HexNAc-)Hex-(HexNAc-(Hex-)Hex-)Hex-HexNAc-(DeHex-)HexNAc+Hex2NeuGc1	Hex-Hex-(HexNAc-)Hex-(Hex-HexNAc-Hex-)Hex-HexNAc-(DeHex-)HexNAc+Hex2NeuGc1	Hex-HexNAc-(Hex-Hex-)Hex-(HexNAc-Hex-)Hex-HexNAc-(DeHex-)HexNAc+Hex2NeuGc1
					3004	3003	817.402	816.893	4	3263.54	30.81	782.933	-	-	No	0	1	116.7	0	0	FALSE	-	2-3-0-0-0		Hex-(Hex-)Hex-HexNAc-HexNAc+Hex
					3006	3003	1510.31	1509.64	3	4525.9	30.83	1116.46	-	-	No	1	1	68.66	207.69	0	FALSE	-	4-6-1-0-0		HexNAc-(Hex-)Hex-(Hex-HexNAc-(Hex-)Hex-)Hex-HexNAc-(DeHex-)HexNAc+Hex	Hex-(HexNAc-)Hex-(HexNAc-(Hex-Hex-)Hex-)Hex-HexNAc-(DeHex-)HexNAc+Hex	Hex-(HexNAc-)Hex-(Hex-HexNAc-(Hex-)Hex-)Hex-HexNAc-(DeHex-)HexNAc+Hex	HexNAc-(HexNAc-)Hex-(Hex-Hex-Hex-Hex-)Hex-HexNAc-(DeHex-)HexNAc+Hex	HexNAc-(Hex-HexNAc-)Hex-(Hex-Hex-Hex-)Hex-HexNAc-(DeHex-)HexNAc+Hex	HexNAc-(HexNAc-)Hex-(Hex-(Hex-Hex-)Hex-)Hex-HexNAc-(DeHex-)HexNAc+Hex	HexNAc-(HexNAc-)Hex-(Hex-Hex-(Hex-)Hex-)Hex-HexNAc-(DeHex-)HexNAc+Hex	HexNAc-(Hex-HexNAc-)Hex-(Hex-(Hex-)Hex-)Hex-HexNAc-(DeHex-)HexNAc+Hex	Hex-HexNAc-Hex-(HexNAc-(Hex-Hex-)Hex-)Hex-HexNAc-(DeHex-)HexNAc+Hex	Hex-(Hex-HexNAc-)Hex-(HexNAc-(Hex-)Hex-)Hex-HexNAc-(DeHex-)HexNAc+Hex	Hex-(Hex-HexNAc-)Hex-(Hex-HexNAc-Hex-)Hex-HexNAc-(DeHex-)HexNAc+Hex	Hex-HexNAc-(HexNAc-)Hex-(Hex-Hex-Hex-)Hex-HexNAc-(DeHex-)HexNAc+Hex	Hex-HexNAc-(HexNAc-)Hex-(Hex-(Hex-)Hex-)Hex-HexNAc-(DeHex-)HexNAc+Hex	Hex-HexNAc-(Hex-HexNAc-)Hex-(Hex-Hex-)Hex-HexNAc-(DeHex-)HexNAc+Hex	HexNAc-(Hex-Hex-)Hex-(Hex-HexNAc-Hex-)Hex-HexNAc-(DeHex-)HexNAc+Hex	HexNAc-(Hex-)Hex-(HexNAc-(Hex-Hex-)Hex-)Hex-HexNAc-(DeHex-)HexNAc+Hex	HexNAc-(Hex-Hex-)Hex-(HexNAc-(Hex-)Hex-)Hex-HexNAc-(DeHex-)HexNAc+Hex	Hex-HexNAc-Hex-(Hex-HexNAc-(Hex-)Hex-)Hex-HexNAc-(DeHex-)HexNAc+Hex
					3008	3003	670.341	670.341	3	2008	30.84	476.894	-	-	No	0	1	136.69	0	0	FALSE	-	2-3-1-0-0		Hex-(Hex-)Hex-HexNAc-(DeHex-)HexNAc+Hex	Hex-(Hex-)Hex-HexNAc-HexNAc+Hex
					3010	3003	1138.48	1138.23	4	4548.89	30.85	805.902	-	-	No	0	1	1.07	128.95	-1	TRUE	-	6-6-1-0-0	0-1-0-0-0	Hex-HexNAc-Hex-HexNAc-Hex-(HexNAc-(HexNAc-)Hex-)Hex-HexNAc-(DeHex-)HexNAc+HexNAc1	Hex-HexNAc-Hex-HexNAc-(HexNAc-)Hex-(HexNAc-Hex-)Hex-HexNAc-(DeHex-)HexNAc+HexNAc1	HexNAc-Hex-HexNAc-Hex-HexNAc-(HexNAc-)Hex-(Hex-)Hex-HexNAc-(DeHex-)HexNAc+HexNAc1	HexNAc-Hex-HexNAc-Hex-HexNAc-Hex-(HexNAc-Hex-)Hex-HexNAc-(DeHex-)HexNAc+HexNAc1
					3012	3003	982.407	982.08	3	2943.22	30.86	723.236	-	-	No	0	0.8	53.05	57.52	-1	TRUE	-	2-8-0-0-0	0-1-0-0-0	Hex-Hex-Hex-Hex-Hex-(Hex-)Hex-HexNAc-HexNAc+HexNAc1	Hex-Hex-Hex-Hex-(Hex-Hex-)Hex-HexNAc-HexNAc+HexNAc1	Hex-Hex-Hex-(Hex-Hex-Hex-)Hex-HexNAc-HexNAc+HexNAc1
					3015	3014	674.308	673.973	6	4037.8	30.87	543.264	-	-	No	0	1	8.14	103.34	0	FALSE	-	2-6-1-0-0		Hex-Hex-Hex-Hex-(Hex-)Hex-HexNAc-(DeHex-)HexNAc+Hex	Hex-Hex-Hex-(Hex-Hex-)Hex-HexNAc-(DeHex-)HexNAc+Hex
					3017	3014	914.177	913.977	5	4564.85	30.89	878.718	-	-	No	0	1	100.45	3.5	-1	TRUE	-	3-4-0-0-0	0-1-0-0-0	HexNAc-Hex-(Hex-)Hex-HexNAc-HexNAc+HexNAc1	Hex-(HexNAc-Hex-)Hex-HexNAc-HexNAc+HexNAc1
					3019	3014	1206.01	1205.49	4	4817.94	30.9	1085.52	-	-	No	0	0.78	42.38	214.11	0	FALSE	-	3-6-1-0-0		Hex-Hex-(Hex-HexNAc-)Hex-(Hex-)Hex-HexNAc-(DeHex-)HexNAc+Hex	Hex-Hex-(HexNAc-)Hex-(Hex-Hex-)Hex-HexNAc-(DeHex-)HexNAc+Hex	Hex-HexNAc-(Hex-Hex-)Hex-(Hex-)Hex-HexNAc-(DeHex-)HexNAc+Hex	Hex-HexNAc-(Hex-)Hex-(Hex-Hex-)Hex-HexNAc-(DeHex-)HexNAc+Hex	Hex-Hex-Hex-(HexNAc-)Hex-(Hex-)Hex-HexNAc-(DeHex-)HexNAc+Hex	HexNAc-(Hex-Hex-)Hex-(Hex-Hex-)Hex-HexNAc-(DeHex-)HexNAc+Hex	HexNAc-(Hex-)Hex-(Hex-(Hex-)Hex-)Hex-HexNAc-(DeHex-)HexNAc+Hex	HexNAc-(Hex-)Hex-(Hex-Hex-Hex-)Hex-HexNAc-(DeHex-)HexNAc+Hex	Hex-Hex-(Hex-)Hex-(HexNAc-Hex-)Hex-HexNAc-(DeHex-)HexNAc+Hex	Hex-(Hex-Hex-)Hex-(HexNAc-Hex-)Hex-HexNAc-(DeHex-)HexNAc+Hex	Hex-(Hex-)Hex-(HexNAc-(Hex-)Hex-)Hex-HexNAc-(DeHex-)HexNAc+Hex	Hex-HexNAc-Hex-(Hex-(Hex-)Hex-)Hex-HexNAc-(DeHex-)HexNAc+Hex	Hex-Hex-Hex-Hex-(HexNAc-Hex-)Hex-HexNAc-(DeHex-)HexNAc+Hex	Hex-Hex-Hex-(HexNAc-(Hex-)Hex-)Hex-HexNAc-(DeHex-)HexNAc+Hex	Hex-Hex-Hex-(Hex-HexNAc-Hex-)Hex-HexNAc-(DeHex-)HexNAc+Hex	Hex-HexNAc-Hex-(Hex-Hex-Hex-)Hex-HexNAc-(DeHex-)HexNAc+Hex	Hex-(Hex-)Hex-(Hex-HexNAc-Hex-)Hex-HexNAc-(DeHex-)HexNAc+Hex
					3021	3014	1404.26	1403.93	3	4208.76	30.91	1057.9	-	-	No	0	0.91	25.83	247.48	0	FALSE	-	4-7-0-0-0		Hex-Hex-(Hex-HexNAc-)Hex-(HexNAc-(Hex-)Hex-)Hex-HexNAc-HexNAc+Hex	Hex-Hex-(Hex-Hex-)Hex-(HexNAc-(HexNAc-)Hex-)Hex-HexNAc-HexNAc+Hex	Hex-Hex-Hex-(Hex-)Hex-(HexNAc-(HexNAc-)Hex-)Hex-HexNAc-HexNAc+Hex	Hex-HexNAc-(HexNAc-)Hex-(Hex-Hex-Hex-Hex-)Hex-HexNAc-HexNAc+Hex	Hex-Hex-(HexNAc-)Hex-(HexNAc-(Hex-Hex-)Hex-)Hex-HexNAc-HexNAc+Hex	Hex-HexNAc-(HexNAc-)Hex-(Hex-Hex-(Hex-)Hex-)Hex-HexNAc-HexNAc+Hex	Hex-HexNAc-(Hex-HexNAc-)Hex-(Hex-Hex-Hex-)Hex-HexNAc-HexNAc+Hex	Hex-HexNAc-(Hex-HexNAc-)Hex-(Hex-(Hex-)Hex-)Hex-HexNAc-HexNAc+Hex	Hex-Hex-(HexNAc-)Hex-(Hex-(Hex-HexNAc-)Hex-)Hex-HexNAc-HexNAc+Hex	Hex-Hex-(Hex-)Hex-(Hex-HexNAc-(HexNAc-)Hex-)Hex-HexNAc-HexNAc+Hex	Hex-Hex-(HexNAc-)Hex-(Hex-Hex-(HexNAc-)Hex-)Hex-HexNAc-HexNAc+Hex	Hex-Hex-Hex-(HexNAc-)Hex-(Hex-(HexNAc-)Hex-)Hex-HexNAc-HexNAc+Hex	Hex-HexNAc-(Hex-)Hex-(Hex-(Hex-HexNAc-)Hex-)Hex-HexNAc-HexNAc+Hex	Hex-HexNAc-(Hex-)Hex-(Hex-Hex-(HexNAc-)Hex-)Hex-HexNAc-HexNAc+Hex	Hex-HexNAc-(Hex-Hex-)Hex-(Hex-(HexNAc-)Hex-)Hex-HexNAc-HexNAc+Hex	Hex-HexNAc-(Hex-)Hex-(HexNAc-(Hex-Hex-)Hex-)Hex-HexNAc-HexNAc+Hex	Hex-HexNAc-(Hex-)Hex-(Hex-HexNAc-(Hex-)Hex-)Hex-HexNAc-HexNAc+Hex	Hex-HexNAc-(Hex-Hex-)Hex-(Hex-HexNAc-Hex-)Hex-HexNAc-HexNAc+Hex	Hex-HexNAc-(Hex-Hex-)Hex-(HexNAc-(Hex-)Hex-)Hex-HexNAc-HexNAc+Hex	Hex-Hex-(Hex-HexNAc-)Hex-(Hex-(HexNAc-)Hex-)Hex-HexNAc-HexNAc+Hex	Hex-Hex-(Hex-)Hex-(HexNAc-(Hex-HexNAc-)Hex-)Hex-HexNAc-HexNAc+Hex	Hex-HexNAc-(HexNAc-)Hex-(Hex-(Hex-Hex-)Hex-)Hex-HexNAc-HexNAc+Hex	Hex-Hex-(HexNAc-)Hex-(Hex-HexNAc-(Hex-)Hex-)Hex-HexNAc-HexNAc+Hex	Hex-Hex-Hex-Hex-(HexNAc-(Hex-HexNAc-)Hex-)Hex-HexNAc-HexNAc+Hex	Hex-Hex-Hex-Hex-(Hex-HexNAc-(HexNAc-)Hex-)Hex-HexNAc-HexNAc+Hex
					3023	3014	1086.41	1086.41	2	2170.81	30.92	1037.79	-	-	No	0	1	101.53	0	0	FALSE	-	2-3-0-0-0		Hex-(Hex-)Hex-HexNAc-HexNAc+Hex
					3026	3025	692.995	692.66	3	2074.96	30.94	681.014	-	-	No	0	1	148.76	0	0	FALSE	-	2-3-1-0-0		Hex-(Hex-)Hex-HexNAc-(DeHex-)HexNAc+Hex	Hex-(Hex-)Hex-HexNAc-HexNAc+Hex
					3028	3025	1505.67	1504.68	2	3007.34	30.95	1457.09	-	-	No	0	1	64.5	0	0	FALSE	-	2-3-0-0-0		Hex-(Hex-)Hex-HexNAc-HexNAc+Hex
					3030	3025	698.328	697.994	3	2090.96	30.96	662.801	-	-	No	0	1	113.83	0	0	FALSE	-	2-3-0-0-0		Hex-(Hex-)Hex-HexNAc-HexNAc+Hex
					3032	3025	834.331	833.997	3	2498.97	30.97	799.85	-	-	No	0	1	140.62	0	0	FALSE	-	2-3-0-0-0		Hex-(Hex-)Hex-HexNAc-HexNAc+Hex
					3034	3025	890.402	890.402	3	2668.18	30.98	857.82	-	-	No	0	1	111.12	0	0	FALSE	-	2-3-0-0-0		Hex-(Hex-)Hex-HexNAc-HexNAc+Hex
					3037	3036	676.558	676.302	4	2701.18	31	341.678	-	-	No	0	1	1.37	101.97	0	FALSE	-	3-4-1-0-0		HexNAc-Hex-(Hex-Hex-)Hex-HexNAc-(DeHex-)HexNAc+Hex	Hex-HexNAc-Hex-(Hex-)Hex-HexNAc-(DeHex-)HexNAc+Hex	HexNAc-(Hex-)Hex-(Hex-)Hex-HexNAc-(DeHex-)HexNAc+Hex
					3039	3036	762.579	762.326	4	3045.28	31.02	562.978	-	-	No	0	1	103.95	26.74	0	FALSE	-	5-3-0-0-0		HexNAc-(HexNAc-)Hex-(HexNAc-Hex-)Hex-HexNAc-HexNAc+Hex	HexNAc-Hex-(HexNAc-(HexNAc-)Hex-)Hex-HexNAc-HexNAc+Hex
					3041	3036	953.404	953.404	5	4761.99	31.03	893.579	-	-	No	0	1	103.37	34.7	0	FALSE	-	4-3-0-0-0		HexNAc-Hex-(HexNAc-Hex-)Hex-HexNAc-HexNAc+Hex	HexNAc-(HexNAc-)Hex-(Hex-)Hex-HexNAc-HexNAc+Hex
					3043	3036	1174.99	1174.74	4	4694.92	31.04	1044.99	-	-	No	0	1	7.78	138.77	0	FALSE	-	3-5-1-0-0		Hex-Hex-(Hex-HexNAc-Hex-)Hex-HexNAc-(DeHex-)HexNAc+Hex	Hex-Hex-(HexNAc-(Hex-)Hex-)Hex-HexNAc-(DeHex-)HexNAc+Hex	Hex-Hex-Hex-(HexNAc-Hex-)Hex-HexNAc-(DeHex-)HexNAc+Hex	Hex-(Hex-)Hex-(HexNAc-Hex-)Hex-HexNAc-(DeHex-)HexNAc+Hex
					3045	3036	720.365	720.033	3	2157.08	31.05	341.678	-	-	No	0	1	105.05	0	0	FALSE	-	2-3-0-0-0		Hex-(Hex-)Hex-HexNAc-HexNAc+Hex
					3048	3047	678.31	678.062	4	2708.22	31.07	643.381	-	-	No	0	1	104.16	0	0	FALSE	-	2-3-0-0-0		Hex-(Hex-)Hex-HexNAc-HexNAc+Hex	Hex-(Hex-)Hex-HexNAc-(DeHex-)HexNAc+Hex
					3050	3047	854.44	854.44	2	1706.87	31.08	818.848	-	-	No	0	1	9.06	0	0	FALSE	-	2-3-0-0-0		Hex-(Hex-)Hex-HexNAc-HexNAc+Hex
					3052	3047	1109.47	1109.13	3	3324.37	31.09	661.337	-	-	No	0	1	2.51	100.87	0	FALSE	-	4-3-1-0-0		HexNAc-Hex-(HexNAc-Hex-)Hex-HexNAc-(DeHex-)HexNAc+Hex	HexNAc-(HexNAc-)Hex-(Hex-)Hex-HexNAc-(DeHex-)HexNAc+Hex
					3054	3047	866.394	866.394	3	2596.16	31.11	466.579	-	-	No	0	0.86	2.2	101.08	0	FALSE	-	4-3-0-0-0		HexNAc-Hex-(HexNAc-Hex-)Hex-HexNAc-HexNAc+Hex	HexNAc-(HexNAc-)Hex-(Hex-)Hex-HexNAc-HexNAc+Hex
					3056	3047	1103.97	1103.97	4	4411.84	31.12	677.31	-	-	No	0	0.99	9.15	206.06	0	FALSE	-	4-7-3-0-0		DeHex-HexNAc-(Hex-Hex-Hex-)Hex-(DeHex-HexNAc-(Hex-)Hex-)Hex-HexNAc-(DeHex-)HexNAc+Hex	DeHex-HexNAc-(DeHex-HexNAc-)Hex-(Hex-Hex-(Hex-Hex-)Hex-)Hex-HexNAc-(DeHex-)HexNAc+Hex	DeHex-HexNAc-(DeHex-HexNAc-)Hex-(Hex-Hex-Hex-Hex-Hex-)Hex-HexNAc-(DeHex-)HexNAc+Hex	DeHex-HexNAc-(Hex-Hex-)Hex-(Hex-(DeHex-)HexNAc-(Hex-)Hex-)Hex-HexNAc-(DeHex-)HexNAc+Hex	DeHex-HexNAc-(DeHex-HexNAc-)Hex-(Hex-Hex-Hex-(Hex-)Hex-)Hex-HexNAc-(DeHex-)HexNAc+Hex	DeHex-HexNAc-(Hex-Hex-Hex-)Hex-(Hex-(DeHex-)HexNAc-Hex-)Hex-HexNAc-(DeHex-)HexNAc+Hex	DeHex-HexNAc-Hex-(DeHex-)HexNAc-(Hex-Hex-)Hex-(Hex-Hex-)Hex-HexNAc-(DeHex-)HexNAc+Hex	DeHex-HexNAc-(Hex-Hex-)Hex-(DeHex-HexNAc-(Hex-Hex-)Hex-)Hex-HexNAc-(DeHex-)HexNAc+Hex	Hex-(DeHex-)HexNAc-(DeHex-HexNAc-)Hex-(Hex-Hex-(Hex-)Hex-)Hex-HexNAc-(DeHex-)HexNAc+Hex	Hex-(DeHex-)HexNAc-(DeHex-HexNAc-)Hex-(Hex-(Hex-Hex-)Hex-)Hex-HexNAc-(DeHex-)HexNAc+Hex	Hex-(DeHex-)HexNAc-(DeHex-HexNAc-)Hex-(Hex-Hex-Hex-Hex-)Hex-HexNAc-(DeHex-)HexNAc+Hex	DeHex-HexNAc-Hex-(DeHex-)HexNAc-(Hex-Hex-Hex-)Hex-(Hex-)Hex-HexNAc-(DeHex-)HexNAc+Hex	DeHex-HexNAc-Hex-(DeHex-)HexNAc-(Hex-)Hex-(Hex-(Hex-)Hex-)Hex-HexNAc-(DeHex-)HexNAc+Hex	Hex-(DeHex-)HexNAc-(Hex-)Hex-(DeHex-HexNAc-(Hex-Hex-)Hex-)Hex-HexNAc-(DeHex-)HexNAc+Hex	DeHex-HexNAc-Hex-(DeHex-)HexNAc-(Hex-)Hex-(Hex-Hex-Hex-)Hex-HexNAc-(DeHex-)HexNAc+Hex	DeHex-HexNAc-Hex-(DeHex-)HexNAc-Hex-(Hex-Hex-(Hex-)Hex-)Hex-HexNAc-(DeHex-)HexNAc+Hex	DeHex-HexNAc-Hex-(DeHex-)HexNAc-Hex-(Hex-(Hex-Hex-)Hex-)Hex-HexNAc-(DeHex-)HexNAc+Hex	Hex-(DeHex-)HexNAc-(Hex-Hex-)Hex-(DeHex-HexNAc-(Hex-)Hex-)Hex-HexNAc-(DeHex-)HexNAc+Hex	Hex-Hex-Hex-(DeHex-HexNAc-)Hex-(DeHex-HexNAc-(Hex-)Hex-)Hex-HexNAc-(DeHex-)HexNAc+Hex	DeHex-HexNAc-Hex-(DeHex-)HexNAc-Hex-(Hex-Hex-Hex-Hex-)Hex-HexNAc-(DeHex-)HexNAc+Hex	Hex-(DeHex-)HexNAc-(Hex-Hex-Hex-)Hex-(DeHex-HexNAc-Hex-)Hex-HexNAc-(DeHex-)HexNAc+Hex	Hex-Hex-Hex-Hex-(DeHex-HexNAc-)Hex-(DeHex-HexNAc-Hex-)Hex-HexNAc-(DeHex-)HexNAc+Hex
					3059	3058	1169.5	1169	4	4671.98	31.14	804.69	-	-	No	0	1	2.15	160.22	0	FALSE	-	5-4-3-1-0		NeuAc-Hex-(DeHex-)HexNAc-(DeHex-HexNAc-)Hex-(HexNAc-Hex-)Hex-HexNAc-(DeHex-)HexNAc+Hex	NeuAc-Hex-(DeHex-)HexNAc-(HexNAc-)Hex-(DeHex-HexNAc-Hex-)Hex-HexNAc-(DeHex-)HexNAc+Hex	NeuAc-Hex-HexNAc-(DeHex-HexNAc-)Hex-(DeHex-HexNAc-Hex-)Hex-HexNAc-(DeHex-)HexNAc+Hex	DeHex-HexNAc-(HexNAc-)Hex-(NeuAc-Hex-(DeHex-)HexNAc-Hex-)Hex-HexNAc-(DeHex-)HexNAc+Hex
					3061	3058	986.468	986.129	3	2955.36	31.15	952.051	-	-	No	0	1	116.13	0	0	FALSE	-	2-3-0-0-0		Hex-(Hex-)Hex-HexNAc-HexNAc+Hex
					3063	3058	908.012	907.671	3	2719.99	31.16	805.902	-	-	No	0	1	109.82	0	0	FALSE	-	2-3-0-0-0		Hex-(Hex-)Hex-HexNAc-HexNAc+Hex
					3065	3058	790.621	790.373	4	3157.46	31.17	558.927	-	-	No	0	1	26.58	103.66	0	FALSE	-	3-4-1-0-0		Hex-Hex-(HexNAc-Hex-)Hex-HexNAc-(DeHex-)HexNAc+Hex
					3067	3058	1350.59	1349.58	3	4045.72	31.18	1058.06	-	-	No	1	0.91	24.25	244.21	0	FALSE	-	4-6-1-0-0		DeHex-HexNAc-Hex-HexNAc-Hex-(Hex-(Hex-)Hex-)Hex-HexNAc-HexNAc+Hex	Hex-HexNAc-(DeHex-HexNAc-)Hex-(Hex-Hex-Hex-)Hex-HexNAc-HexNAc+Hex	DeHex-HexNAc-Hex-HexNAc-(Hex-Hex-)Hex-(Hex-)Hex-HexNAc-HexNAc+Hex	DeHex-HexNAc-Hex-HexNAc-(Hex-)Hex-(Hex-Hex-)Hex-HexNAc-HexNAc+Hex	Hex-HexNAc-(DeHex-HexNAc-)Hex-(Hex-(Hex-)Hex-)Hex-HexNAc-HexNAc+Hex	DeHex-HexNAc-Hex-HexNAc-Hex-(Hex-Hex-Hex-)Hex-HexNAc-HexNAc+Hex
					3070	3069	918.901	918.901	2	1835.79	31.2	554.768	-	-	No	0	1	165.67	0	0	FALSE	-	2-3-0-0-0		Hex-(Hex-)Hex-HexNAc-HexNAc+Hex	Hex-(Hex-)Hex-HexNAc-(DeHex-)HexNAc+Hex
					3072	3069	1077.71	1077.71	4	4306.81	31.22	812.854	-	-	No	1	0.53	50.63	200.11	0	FALSE	-	3-6-2-0-0		Hex-Hex-Hex-(DeHex-HexNAc-)Hex-(Hex-)Hex-HexNAc-(DeHex-)HexNAc+Hex	Hex-Hex-(DeHex-HexNAc-)Hex-(Hex-Hex-)Hex-HexNAc-(DeHex-)HexNAc+Hex
					3074	3069	1437.61	1437.28	3	4308.82	31.23	1117.31	-	-	No	0	1	27.68	270.58	-2	TRUE	-	5-6-2-0-0	1-1-0-0-0	Hex-(HexNAc-)Hex-(Hex-(DeHex-)HexNAc-Hex-)Hex-HexNAc-(DeHex-)HexNAc+Hex1HexNAc1	HexNAc-(DeHex-HexNAc-)Hex-(Hex-(Hex-)Hex-)Hex-HexNAc-(DeHex-)HexNAc+Hex1HexNAc1	Hex-HexNAc-Hex-(Hex-(DeHex-)HexNAc-Hex-)Hex-HexNAc-(DeHex-)HexNAc+Hex1HexNAc1	Hex-(DeHex-)HexNAc-Hex-HexNAc-Hex-(Hex-)Hex-HexNAc-(DeHex-)HexNAc+Hex1HexNAc1	Hex-HexNAc-(Hex-(DeHex-)HexNAc-)Hex-(Hex-)Hex-HexNAc-(DeHex-)HexNAc+Hex1HexNAc1	HexNAc-(Hex-)Hex-(Hex-(DeHex-)HexNAc-Hex-)Hex-HexNAc-(DeHex-)HexNAc+Hex1HexNAc1	HexNAc-(DeHex-HexNAc-)Hex-(Hex-Hex-Hex-)Hex-HexNAc-(DeHex-)HexNAc+Hex1HexNAc1	Hex-Hex-(DeHex-HexNAc-)Hex-(HexNAc-Hex-)Hex-HexNAc-(DeHex-)HexNAc+Hex1HexNAc1	Hex-(DeHex-HexNAc-)Hex-(HexNAc-(Hex-)Hex-)Hex-HexNAc-(DeHex-)HexNAc+Hex1HexNAc1	Hex-(DeHex-HexNAc-)Hex-(Hex-HexNAc-Hex-)Hex-HexNAc-(DeHex-)HexNAc+Hex1HexNAc1
					3076	3069	901.414	900.918	2	1799.82	31.24	1005.39	-	-	No	0	1	133.08	0	0	FALSE	-	2-3-0-0-0		Hex-(Hex-)Hex-HexNAc-HexNAc+Hex
					3078	3069	1007.95	1007.46	2	2012.9	31.25	990.331	-	-	No	0	1	116.84	0.43	0	FALSE	-	2-4-0-0-0		Hex-(Hex-Hex-)Hex-HexNAc-HexNAc+Hex	Hex-Hex-(Hex-)Hex-HexNAc-HexNAc+Hex
					3081	3080	709.329	708.66	3	2122.96	31.27	682.433	-	-	No	0	1	147.66	0	0	FALSE	-	2-3-1-0-0		Hex-(Hex-)Hex-HexNAc-(DeHex-)HexNAc+Hex	Hex-(Hex-)Hex-HexNAc-HexNAc+Hex
					3083	3080	723.325	723.325	3	2166.95	31.29	688.682	-	-	No	0	1	101.34	0	0	FALSE	-	2-3-1-0-0		Hex-(Hex-)Hex-HexNAc-(DeHex-)HexNAc+Hex
					3085	3080	701.909	701.909	2	1401.8	31.3	331.172	-	-	No	0	1	198.1	0	0	FALSE	-	2-3-0-0-0		Hex-(Hex-)Hex-HexNAc-HexNAc+Hex
					3087	3080	717.364	717.364	4	2865.43	31.31	682.358	-	-	No	0	1	121.43	0	0	FALSE	-	2-3-0-0-0		Hex-(Hex-)Hex-HexNAc-HexNAc+Hex	Hex-(Hex-)Hex-HexNAc-(DeHex-)HexNAc+Hex
					3089	3080	903.749	903.749	5	4513.71	31.32	1129.61	-	-	No	0	1	113.01	0	0	FALSE	-	2-3-1-0-0		Hex-(Hex-)Hex-HexNAc-(DeHex-)HexNAc+Hex
					3092	3091	667.627	667.295	3	1998.86	31.34	632.984	-	-	No	0	0.85	107.84	0	0	FALSE	-	2-3-0-0-0		Hex-(Hex-)Hex-HexNAc-HexNAc+Hex	Hex-(Hex-)Hex-HexNAc-(DeHex-)HexNAc+Hex
					3094	3091	921.479	921.479	2	1840.94	31.35	689.853	-	-	No	0	1	106.54	0	0	FALSE	-	2-3-0-0-0		Hex-(Hex-)Hex-HexNAc-HexNAc+Hex
					3096	3091	1115.5	1115.5	2	2228.99	31.36	1063.34	-	-	No	0	1	100.63	0.02	0	FALSE	-	3-3-0-0-0		HexNAc-Hex-(Hex-)Hex-HexNAc-HexNAc+Hex	Hex-(HexNAc-Hex-)Hex-HexNAc-HexNAc+Hex
					3098	3091	1090.41	1089.92	2	2177.82	31.37	1006.59	-	-	No	0	1	11.68	0.05	0	FALSE	-	3-3-0-0-0		HexNAc-Hex-(Hex-)Hex-HexNAc-HexNAc+Hex	Hex-(HexNAc-Hex-)Hex-HexNAc-HexNAc+Hex
					3100	3091	950.476	949.969	2	1897.92	31.38	1041.55	-	-	No	0	1	167.61	0	0	FALSE	-	2-3-0-0-0		Hex-(Hex-)Hex-HexNAc-HexNAc+Hex
					3103	3102	1084.48	1084.48	2	2166.95	31.4	1032.34	-	-	No	0	1	100.78	0	0	FALSE	-	2-3-0-0-0		Hex-(Hex-)Hex-HexNAc-HexNAc+Hex
					3105	3102	1041.45	1041.2	4	4160.77	31.42	812.854	-	-	No	0	0.59	25.64	125.1	0	FALSE	-	3-6-1-0-0		DeHex-HexNAc-(Hex-)Hex-(Hex-(Hex-)Hex-)Hex-HexNAc-HexNAc+Hex	DeHex-HexNAc-Hex-(Hex-(Hex-Hex-)Hex-)Hex-HexNAc-HexNAc+Hex	DeHex-HexNAc-Hex-(Hex-Hex-Hex-Hex-)Hex-HexNAc-HexNAc+Hex	DeHex-HexNAc-(Hex-Hex-)Hex-(Hex-Hex-)Hex-HexNAc-HexNAc+Hex	DeHex-HexNAc-(Hex-)Hex-(Hex-Hex-Hex-)Hex-HexNAc-HexNAc+Hex	DeHex-HexNAc-Hex-(Hex-Hex-(Hex-)Hex-)Hex-HexNAc-HexNAc+Hex
					3107	3102	965.407	965.074	3	2892.2	31.43	667.294	-	-	No	0	1	100.57	0.42	0	FALSE	-	3-4-1-0-0		DeHex-HexNAc-(Hex-)Hex-(Hex-)Hex-HexNAc-HexNAc+Hex	DeHex-HexNAc-Hex-(Hex-Hex-)Hex-HexNAc-HexNAc+Hex
					3111	3102	846.373	846.04	3	2535.1	31.45	456.879	-	-	No	1	0.57	2.36	100	0	FALSE	-	3-3-1-0-0		Hex-(HexNAc-Hex-)Hex-HexNAc-(DeHex-)HexNAc+Hex	HexNAc-Hex-(Hex-)Hex-HexNAc-(DeHex-)HexNAc+Hex
					3114	3113	1268.05	1268.05	2	2534.08	31.47	1318.85	-	-	No	0	1	117.22	0	-3	TRUE	-	3-5-0-0-0	1-2-0-0-0	Hex-(Hex-)Hex-HexNAc-HexNAc+Hex1HexNAc2
					3116	3113	1139.73	1139.48	4	4553.9	31.48	1113.94	-	-	No	0	1	16.97	103.07	0	FALSE	-	2-5-0-0-0		Hex-Hex-Hex-(Hex-)Hex-HexNAc-HexNAc+Hex	Hex-Hex-(Hex-Hex-)Hex-HexNAc-HexNAc+Hex
					3118	3113	1298.88	1298.56	3	3892.64	31.49	1116.35	-	-	No	1	1	131.1	27.89	-2	TRUE	-	2-9-0-0-0	0-2-0-0-0	Hex-Hex-Hex-Hex-Hex-(Hex-)Hex-HexNAc-HexNAc+HexNAc2	Hex-Hex-Hex-Hex-(Hex-Hex-)Hex-HexNAc-HexNAc+HexNAc2	Hex-Hex-Hex-(Hex-Hex-Hex-)Hex-HexNAc-HexNAc+HexNAc2
					3120	3113	812.45	812.45	2	1622.89	31.5	576.784	-	-	No	0	1	77.67	0	0	FALSE	-	2-3-0-0-0		Hex-(Hex-)Hex-HexNAc-HexNAc+Hex
					3122	3113	884.691	884.691	3	2651.05	31.52	852.42	-	-	No	0	1	108.37	0.29	0	FALSE	-	2-4-0-0-0		Hex-Hex-(Hex-)Hex-HexNAc-HexNAc+Hex	Hex-(Hex-Hex-)Hex-HexNAc-HexNAc+Hex
					3125	3124	780.344	780.344	3	2338.01	31.54	341.678	-	-	No	0	1	0.96	101.8	0	FALSE	-	2-5-1-0-0		Hex-Hex-(Hex-Hex-)Hex-HexNAc-(DeHex-)HexNAc+Hex	Hex-Hex-Hex-(Hex-)Hex-HexNAc-(DeHex-)HexNAc+Hex
					3127	3124	729.373	729.039	3	2184.1	31.55	693.797	-	-	No	0	1	125.08	0	0	FALSE	-	2-3-1-0-0		Hex-(Hex-)Hex-HexNAc-(DeHex-)HexNAc+Hex
					3129	3124	837.382	836.88	4	3343.49	31.56	464.582	-	-	No	0	1	1.68	119.71	0	FALSE	-	4-3-2-0-0		HexNAc-Hex-(DeHex-HexNAc-Hex-)Hex-HexNAc-(DeHex-)HexNAc+Hex	HexNAc-(DeHex-HexNAc-)Hex-(Hex-)Hex-HexNAc-(DeHex-)HexNAc+Hex
					3131	3124	927.359	926.857	2	1851.7	31.57	875.246	-	-	No	0	1	134.33	0	0	FALSE	-	2-3-0-0-0		Hex-(Hex-)Hex-HexNAc-HexNAc+Hex
					3133	3124	1097.47	1096.97	2	2191.92	31.58	677.31	-	-	No	0	1	100.19	0	0	FALSE	-	2-3-0-0-0		Hex-(Hex-)Hex-HexNAc-HexNAc+Hex
					3136	3135	652.835	652.835	2	1303.66	31.6	617.617	-	-	No	0	1	88.14	0	0	FALSE	-	2-3-0-0-0		Hex-(Hex-)Hex-HexNAc-HexNAc+Hex
					3138	3135	706.659	706.323	3	2115.95	31.61	672.017	-	-	No	0	1	106.29	0	0	FALSE	-	2-3-1-0-0		Hex-(Hex-)Hex-HexNAc-(DeHex-)HexNAc+Hex	Hex-(Hex-)Hex-HexNAc-HexNAc+Hex
					3140	3135	856.34	856.006	3	2565	31.62	454.74	-	-	No	0	1	113.71	0	0	FALSE	-	2-3-0-0-0		Hex-(Hex-)Hex-HexNAc-HexNAc+Hex	Hex-(Hex-)Hex-HexNAc-(DeHex-)HexNAc+Hex
					3142	3135	1067.93	1067.93	2	2133.85	31.63	1041.7	-	-	No	0	1	138.26	0	0	FALSE	-	2-3-0-0-0		Hex-(Hex-)Hex-HexNAc-HexNAc+Hex
					3147	3146	680.959	680.624	3	2038.85	31.66	646.45	-	-	No	0	1	120.33	0	0	FALSE	-	2-3-0-0-0		Hex-(Hex-)Hex-HexNAc-HexNAc+Hex
					3149	3146	745.399	745.399	3	2233.17	31.67	718.554	-	-	No	0	1	105.96	0	0	FALSE	-	2-3-0-0-0		Hex-(Hex-)Hex-HexNAc-HexNAc+Hex
					3151	3146	839.714	839.378	3	2515.11	31.68	370.181	-	-	No	0	0.88	0.14	100.99	0	FALSE	-	3-4-2-0-0		Hex-Hex-(DeHex-HexNAc-Hex-)Hex-HexNAc-(DeHex-)HexNAc+Hex
					3153	3146	875.836	875.334	2	1748.65	31.69	765.399	-	-	No	0	1	109.75	0	0	FALSE	-	2-3-0-0-0		Hex-(Hex-)Hex-HexNAc-HexNAc+Hex
					3155	3146	1047.2	1046.69	4	4182.75	31.7	684.815	-	-	No	0	1	4.36	149.29	0	FALSE	-	5-7-1-0-0		Hex-HexNAc-(Hex-Hex-)Hex-(Hex-HexNAc-(HexNAc-)Hex-)Hex-HexNAc-(DeHex-)HexNAc+Hex	HexNAc-Hex-HexNAc-(Hex-HexNAc-)Hex-(Hex-(Hex-)Hex-)Hex-HexNAc-(DeHex-)HexNAc+Hex	HexNAc-Hex-HexNAc-(Hex-HexNAc-)Hex-(Hex-Hex-Hex-)Hex-HexNAc-(DeHex-)HexNAc+Hex	HexNAc-Hex-HexNAc-(HexNAc-)Hex-(Hex-Hex-(Hex-)Hex-)Hex-HexNAc-(DeHex-)HexNAc+Hex	HexNAc-Hex-HexNAc-(HexNAc-)Hex-(Hex-(Hex-Hex-)Hex-)Hex-HexNAc-(DeHex-)HexNAc+Hex	HexNAc-Hex-HexNAc-(HexNAc-)Hex-(Hex-Hex-Hex-Hex-)Hex-HexNAc-(DeHex-)HexNAc+Hex	Hex-HexNAc-(Hex-HexNAc-)Hex-(Hex-HexNAc-(Hex-)Hex-)Hex-HexNAc-(DeHex-)HexNAc+Hex	Hex-HexNAc-(Hex-HexNAc-)Hex-(HexNAc-(Hex-Hex-)Hex-)Hex-HexNAc-(DeHex-)HexNAc+Hex	Hex-HexNAc-(HexNAc-)Hex-(Hex-HexNAc-(Hex-Hex-)Hex-)Hex-HexNAc-(DeHex-)HexNAc+Hex	Hex-HexNAc-(Hex-HexNAc-)Hex-(Hex-Hex-(HexNAc-)Hex-)Hex-HexNAc-(DeHex-)HexNAc+Hex	Hex-HexNAc-(HexNAc-)Hex-(Hex-Hex-Hex-(HexNAc-)Hex-)Hex-HexNAc-(DeHex-)HexNAc+Hex	Hex-HexNAc-(HexNAc-)Hex-(Hex-Hex-(Hex-HexNAc-)Hex-)Hex-HexNAc-(DeHex-)HexNAc+Hex	Hex-HexNAc-(Hex-HexNAc-)Hex-(Hex-(Hex-HexNAc-)Hex-)Hex-HexNAc-(DeHex-)HexNAc+Hex	Hex-Hex-Hex-Hex-(HexNAc-)Hex-(HexNAc-(HexNAc-)Hex-)Hex-HexNAc-(DeHex-)HexNAc+Hex	Hex-Hex-Hex-(Hex-HexNAc-)Hex-(HexNAc-(HexNAc-)Hex-)Hex-HexNAc-(DeHex-)HexNAc+Hex	Hex-Hex-Hex-(HexNAc-)Hex-(Hex-HexNAc-(HexNAc-)Hex-)Hex-HexNAc-(DeHex-)HexNAc+Hex	Hex-Hex-Hex-(HexNAc-)Hex-(HexNAc-(Hex-HexNAc-)Hex-)Hex-HexNAc-(DeHex-)HexNAc+Hex	Hex-Hex-(Hex-HexNAc-)Hex-(Hex-HexNAc-(HexNAc-)Hex-)Hex-HexNAc-(DeHex-)HexNAc+Hex	Hex-Hex-(Hex-HexNAc-)Hex-(HexNAc-(Hex-HexNAc-)Hex-)Hex-HexNAc-(DeHex-)HexNAc+Hex	Hex-Hex-(HexNAc-)Hex-(Hex-HexNAc-(Hex-HexNAc-)Hex-)Hex-HexNAc-(DeHex-)HexNAc+Hex	Hex-HexNAc-(Hex-Hex-Hex-)Hex-(HexNAc-(HexNAc-)Hex-)Hex-HexNAc-(DeHex-)HexNAc+Hex	Hex-HexNAc-(Hex-Hex-)Hex-(HexNAc-(Hex-HexNAc-)Hex-)Hex-HexNAc-(DeHex-)HexNAc+Hex	Hex-HexNAc-Hex-HexNAc-(HexNAc-)Hex-(Hex-Hex-Hex-)Hex-HexNAc-(DeHex-)HexNAc+Hex	Hex-HexNAc-Hex-HexNAc-(Hex-Hex-)Hex-(HexNAc-Hex-)Hex-HexNAc-(DeHex-)HexNAc+Hex	Hex-HexNAc-(Hex-)Hex-(Hex-HexNAc-(Hex-HexNAc-)Hex-)Hex-HexNAc-(DeHex-)HexNAc+Hex
					3158	3157	685.002	684.667	3	2050.98	31.72	675.645	-	-	No	0	1	114.4	0	0	FALSE	-	2-3-1-0-0		Hex-(Hex-)Hex-HexNAc-(DeHex-)HexNAc+Hex	Hex-(Hex-)Hex-HexNAc-HexNAc+Hex
					3162	3157	810.37	810.37	2	1618.73	31.75	554.768	-	-	No	0	1	103.75	0	0	FALSE	-	2-3-0-0-0		Hex-(Hex-)Hex-HexNAc-HexNAc+Hex
					3164	3157	970.421	969.917	2	1937.82	31.76	735.045	-	-	No	0	1	100.79	0	0	FALSE	-	2-3-0-0-0		Hex-(Hex-)Hex-HexNAc-HexNAc+Hex	Hex-(Hex-)Hex-HexNAc-(DeHex-)HexNAc+Hex
					3166	3157	941.448	941.202	4	3760.78	31.77	739.867	-	-	No	0	1	101.38	2.68	0	FALSE	-	2-8-0-0-0		Hex-Hex-Hex-(Hex-Hex-Hex-Hex-)Hex-HexNAc-HexNAc+Hex	Hex-Hex-Hex-Hex-Hex-Hex-(Hex-)Hex-HexNAc-HexNAc+Hex	Hex-Hex-Hex-Hex-(Hex-Hex-Hex-)Hex-HexNAc-HexNAc+Hex	Hex-Hex-Hex-Hex-Hex-(Hex-Hex-)Hex-HexNAc-HexNAc+Hex
					3169	3168	731.98	731.646	3	2191.92	31.79	577.973	-	-	No	0	1	107.45	3.25	-1	TRUE	-	3-3-1-0-0	0-0-1-0-0	HexNAc-Hex-(Hex-)Hex-HexNAc-HexNAc+DeHex1	Hex-(HexNAc-Hex-)Hex-HexNAc-HexNAc+DeHex1
					3171	3168	905.76	905.426	3	2713.26	31.8	647.322	-	-	No	0	1	27.78	113.48	0	FALSE	-	3-5-1-0-0		Hex-(Hex-)Hex-(DeHex-HexNAc-Hex-)Hex-HexNAc-HexNAc+Hex	Hex-Hex-Hex-(DeHex-HexNAc-Hex-)Hex-HexNAc-HexNAc+Hex	Hex-(DeHex-)HexNAc-Hex-(Hex-Hex-)Hex-HexNAc-HexNAc+Hex
					3173	3168	758.391	758.058	3	2271.15	31.81	723.566	-	-	No	0	1	101.39	0	0	FALSE	-	2-3-0-0-0		Hex-(Hex-)Hex-HexNAc-HexNAc+Hex
					3175	3168	661.659	661.323	3	1980.95	31.82	554.768	-	-	No	0	1	108.22	0	0	FALSE	-	2-3-1-0-0		Hex-(Hex-)Hex-HexNAc-(DeHex-)HexNAc+Hex	Hex-(Hex-)Hex-HexNAc-HexNAc+Hex
					3177	3168	913.059	912.719	3	2735.13	31.83	431.884	-	-	No	0	0.95	32.44	237.54	0	FALSE	-	2-7-0-0-0		Hex-Hex-Hex-Hex-Hex-(Hex-)Hex-HexNAc-HexNAc+Hex	Hex-Hex-Hex-(Hex-Hex-Hex-)Hex-HexNAc-HexNAc+Hex	Hex-Hex-Hex-Hex-(Hex-Hex-)Hex-HexNAc-HexNAc+Hex
					3180	3179	963.443	963.107	3	2886.3	31.85	746.52	-	-	No	0	1	170.58	90.94	0	FALSE	-	3-6-0-0-0		Hex-Hex-Hex-(HexNAc-(Hex-)Hex-)Hex-HexNAc-HexNAc+Hex	HexNAc-Hex-Hex-(Hex-)Hex-(Hex-)Hex-HexNAc-HexNAc+Hex	Hex-HexNAc-Hex-Hex-Hex-(Hex-)Hex-HexNAc-HexNAc+Hex	HexNAc-Hex-Hex-Hex-(Hex-Hex-)Hex-HexNAc-HexNAc+Hex	Hex-Hex-(Hex-)Hex-(HexNAc-Hex-)Hex-HexNAc-HexNAc+Hex	Hex-Hex-Hex-Hex-(HexNAc-Hex-)Hex-HexNAc-HexNAc+Hex	Hex-Hex-Hex-(Hex-HexNAc-Hex-)Hex-HexNAc-HexNAc+Hex
					3182	3179	1356.54	1356.54	2	2711.07	31.86	1390.77	-	-	No	0	1	112.44	0	0	FALSE	-	2-3-0-0-0		Hex-(Hex-)Hex-HexNAc-HexNAc+Hex
					3184	3179	1665.68	1665.18	2	3328.35	31.87	733.975	-	-	No	0	1	12.36	148.35	0	FALSE	-	3-7-0-1-0		Hex-Hex-Hex-Hex-(NeuAc-Hex-HexNAc-Hex-)Hex-HexNAc-HexNAc+Hex	Hex-Hex-(NeuAc-Hex-HexNAc-)Hex-(Hex-Hex-)Hex-HexNAc-HexNAc+Hex	NeuAc-Hex-HexNAc-(Hex-)Hex-(Hex-Hex-Hex-)Hex-HexNAc-HexNAc+Hex	Hex-Hex-(Hex-)Hex-(NeuAc-Hex-HexNAc-Hex-)Hex-HexNAc-HexNAc+Hex	Hex-Hex-Hex-(NeuAc-Hex-HexNAc-)Hex-(Hex-)Hex-HexNAc-HexNAc+Hex	NeuAc-Hex-HexNAc-(Hex-)Hex-(Hex-(Hex-)Hex-)Hex-HexNAc-HexNAc+Hex	NeuAc-Hex-HexNAc-(Hex-Hex-)Hex-(Hex-Hex-)Hex-HexNAc-HexNAc+Hex
					3186	3179	1128.16	1127.82	3	3380.43	31.88	689.853	-	-	No	0	1	12.83	175.32	0	FALSE	-	4-5-3-0-0		DeHex-HexNAc-Hex-(DeHex-)HexNAc-(Hex-)Hex-(Hex-)Hex-HexNAc-(DeHex-)HexNAc+Hex	Hex-(DeHex-)HexNAc-(Hex-(DeHex-)HexNAc-)Hex-(Hex-)Hex-HexNAc-(DeHex-)HexNAc+Hex	Hex-(DeHex-)HexNAc-Hex-(Hex-(DeHex-)HexNAc-Hex-)Hex-HexNAc-(DeHex-)HexNAc+Hex	Hex-(DeHex-)HexNAc-Hex-(DeHex-HexNAc-(Hex-)Hex-)Hex-HexNAc-(DeHex-)HexNAc+Hex	DeHex-HexNAc-Hex-(DeHex-)HexNAc-Hex-(Hex-Hex-)Hex-HexNAc-(DeHex-)HexNAc+Hex	Hex-(DeHex-)HexNAc-Hex-(DeHex-)HexNAc-Hex-(Hex-)Hex-HexNAc-(DeHex-)HexNAc+Hex	Hex-(DeHex-)HexNAc-(DeHex-HexNAc-)Hex-(Hex-Hex-)Hex-HexNAc-(DeHex-)HexNAc+Hex
					3188	3179	910.412	909.91	2	1817.81	31.89	901.162	-	-	No	0	1	104.08	0	0	FALSE	-	2-3-0-0-0		Hex-(Hex-)Hex-HexNAc-HexNAc+Hex	Hex-(Hex-)Hex-HexNAc-(DeHex-)HexNAc+Hex
					3191	3190	770.079	769.746	3	2306.22	31.91	667.294	-	-	No	0	1	100.68	0	0	FALSE	-	2-3-0-0-0		Hex-(Hex-)Hex-HexNAc-HexNAc+Hex	Hex-(Hex-)Hex-HexNAc-(DeHex-)HexNAc+Hex
					3193	3190	897.88	897.38	2	1792.74	31.93	581.63	-	-	No	0	1	100.57	0	0	FALSE	-	2-3-1-0-0		Hex-(Hex-)Hex-HexNAc-(DeHex-)HexNAc+Hex	Hex-(Hex-)Hex-HexNAc-HexNAc+Hex
					3195	3190	1074.01	1074.01	2	2146.01	31.94	1021.91	-	-	No	0	1	100.47	0	0	FALSE	-	2-3-0-0-0		Hex-(Hex-)Hex-HexNAc-HexNAc+Hex
					3197	3190	1056.92	1056.42	2	2110.84	31.95	659.316	-	-	No	0	1	100.23	0	0	FALSE	-	2-3-1-0-0		Hex-(Hex-)Hex-HexNAc-(DeHex-)HexNAc+Hex	Hex-(Hex-)Hex-HexNAc-HexNAc+Hex
					3199	3190	783.341	783.341	3	2347	31.96	625.547	-	-	No	0	1	129.09	0	0	FALSE	-	2-3-1-0-0		Hex-(Hex-)Hex-HexNAc-(DeHex-)HexNAc+Hex
					3202	3201	658.828	658.828	2	1315.64	31.98	440.253	-	-	No	0	1	114.65	0	0	FALSE	-	2-3-0-0-0		Hex-(Hex-)Hex-HexNAc-HexNAc+Hex	Hex-(Hex-)Hex-HexNAc-(DeHex-)HexNAc+Hex
					3204	3201	733.358	733.358	3	2197.05	31.99	715.646	-	-	No	0	1	107.72	0	0	FALSE	-	2-3-0-0-0		Hex-(Hex-)Hex-HexNAc-HexNAc+Hex
					3206	3201	872.362	872.362	3	2614.06	32	406.931	-	-	No	0	1	2.73	116.62	0	FALSE	-	3-4-2-0-0		DeHex-HexNAc-(Hex-)Hex-(Hex-)Hex-HexNAc-(DeHex-)HexNAc+Hex	DeHex-HexNAc-Hex-(Hex-Hex-)Hex-HexNAc-(DeHex-)HexNAc+Hex
					3208	3201	1692.24	1691.23	2	3380.45	32.01	1377.86	-	-	No	0	1	155.77	0	0	FALSE	-	2-3-1-0-0		Hex-(Hex-)Hex-HexNAc-(DeHex-)HexNAc+Hex	Hex-(Hex-)Hex-HexNAc-HexNAc+Hex
					3210	3201	991.485	991.485	2	1980.95	32.02	959.892	-	-	No	0	1	101.53	0	0	FALSE	-	2-3-1-0-0		Hex-(Hex-)Hex-HexNAc-(DeHex-)HexNAc+Hex	Hex-(Hex-)Hex-HexNAc-HexNAc+Hex
					3213	3212	740.349	740.017	3	2217.03	32.04	529.276	-	-	No	0	1	100.65	0	0	FALSE	-	2-3-0-0-0		Hex-(Hex-)Hex-HexNAc-HexNAc+Hex	Hex-(Hex-)Hex-HexNAc-(DeHex-)HexNAc+Hex
					3217	3212	788.714	788.714	3	2363.12	32.06	754.166	-	-	No	0	1	117.54	0	0	FALSE	-	2-3-0-0-0		Hex-(Hex-)Hex-HexNAc-HexNAc+Hex
					3221	3212	1117.99	1117.49	2	2232.97	32.08	537.604	-	-	No	0	1	100.36	0.15	0	FALSE	-	3-3-1-0-0		DeHex-HexNAc-Hex-(Hex-)Hex-HexNAc-HexNAc+Hex
					3224	3223	704.952	704.283	3	2109.83	32.1	670.099	-	-	No	0	1	100.21	0	0	FALSE	-	2-3-0-0-0		Hex-(Hex-)Hex-HexNAc-HexNAc+Hex
					3226	3223	1001.42	1001.08	3	3000.23	32.11	760.893	-	-	No	0	1	103.66	7.57	0	FALSE	-	2-6-0-0-0		Hex-Hex-(Hex-Hex-Hex-)Hex-HexNAc-HexNAc+Hex	Hex-Hex-Hex-(Hex-Hex-)Hex-HexNAc-HexNAc+Hex	Hex-Hex-Hex-Hex-(Hex-)Hex-HexNAc-HexNAc+Hex
					3228	3223	832.08	831.746	3	2492.22	32.12	460.238	-	-	No	0	1	112.74	0	0	FALSE	-	2-3-1-0-0		Hex-(Hex-)Hex-HexNAc-(DeHex-)HexNAc+Hex	Hex-(Hex-)Hex-HexNAc-HexNAc+Hex
					3230	3223	776.688	776.348	3	2326.02	32.13	939.076	-	-	No	0	1	102.42	0	0	FALSE	-	2-3-0-0-0		Hex-(Hex-)Hex-HexNAc-HexNAc+Hex
					3232	3223	1079.81	1079.48	3	3235.41	32.14	514.921	-	-	No	0	1	3.78	187.55	0	FALSE	-	4-4-3-0-1		NeuGc-Hex-(DeHex-)HexNAc-(DeHex-HexNAc-)Hex-(Hex-)Hex-HexNAc-(DeHex-)HexNAc+Hex	NeuGc-Hex-(DeHex-)HexNAc-Hex-(DeHex-HexNAc-Hex-)Hex-HexNAc-(DeHex-)HexNAc+Hex
					3235	3234	825.364	824.86	4	3295.41	32.16	447.56	-	-	No	0	1	0.17	101.16	0	FALSE	-	4-4-1-0-0		HexNAc-(Hex-HexNAc-)Hex-(Hex-)Hex-HexNAc-(DeHex-)HexNAc+Hex	HexNAc-(HexNAc-)Hex-(Hex-Hex-)Hex-HexNAc-(DeHex-)HexNAc+Hex	HexNAc-(Hex-)Hex-(HexNAc-Hex-)Hex-HexNAc-(DeHex-)HexNAc+Hex	Hex-HexNAc-Hex-(HexNAc-Hex-)Hex-HexNAc-(DeHex-)HexNAc+Hex	HexNAc-Hex-(HexNAc-(Hex-)Hex-)Hex-HexNAc-(DeHex-)HexNAc+Hex	HexNAc-Hex-(Hex-HexNAc-Hex-)Hex-HexNAc-(DeHex-)HexNAc+Hex	Hex-HexNAc-(HexNAc-)Hex-(Hex-)Hex-HexNAc-(DeHex-)HexNAc+Hex
					3237	3234	1123.8	1123.46	3	3367.36	32.17	589.759	-	-	No	0	0.75	4.69	116.24	0	FALSE	-	3-10-0-0-0		Hex-Hex-Hex-Hex-Hex-Hex-(Hex-Hex-(HexNAc-)Hex-)Hex-HexNAc-HexNAc+Hex	Hex-Hex-Hex-Hex-(Hex-Hex-Hex-)Hex-(HexNAc-Hex-)Hex-HexNAc-HexNAc+Hex	Hex-Hex-Hex-Hex-(Hex-Hex-)Hex-(HexNAc-(Hex-)Hex-)Hex-HexNAc-HexNAc+Hex	HexNAc-Hex-Hex-(Hex-Hex-Hex-)Hex-(Hex-Hex-Hex-)Hex-HexNAc-HexNAc+Hex	HexNAc-Hex-Hex-(Hex-Hex-)Hex-(Hex-Hex-(Hex-)Hex-)Hex-HexNAc-HexNAc+Hex	HexNAc-Hex-Hex-(Hex-)Hex-(Hex-Hex-(Hex-Hex-)Hex-)Hex-HexNAc-HexNAc+Hex	Hex-HexNAc-Hex-Hex-Hex-(Hex-Hex-(Hex-Hex-)Hex-)Hex-HexNAc-HexNAc+Hex	Hex-Hex-(Hex-Hex-Hex-)Hex-(HexNAc-Hex-Hex-Hex-)Hex-HexNAc-HexNAc+Hex	Hex-Hex-(Hex-Hex-)Hex-(HexNAc-Hex-Hex-(Hex-)Hex-)Hex-HexNAc-HexNAc+Hex	Hex-Hex-(Hex-Hex-)Hex-(Hex-HexNAc-Hex-Hex-Hex-)Hex-HexNAc-HexNAc+Hex	Hex-HexNAc-Hex-Hex-(Hex-Hex-)Hex-(Hex-Hex-Hex-)Hex-HexNAc-HexNAc+Hex	Hex-HexNAc-Hex-Hex-(Hex-)Hex-(Hex-Hex-(Hex-)Hex-)Hex-HexNAc-HexNAc+Hex	Hex-Hex-Hex-Hex-Hex-(Hex-Hex-Hex-(HexNAc-)Hex-)Hex-HexNAc-HexNAc+Hex	Hex-HexNAc-Hex-Hex-Hex-Hex-(Hex-Hex-)Hex-(Hex-)Hex-HexNAc-HexNAc+Hex	Hex-Hex-Hex-Hex-(Hex-)Hex-(Hex-Hex-(HexNAc-)Hex-)Hex-HexNAc-HexNAc+Hex	Hex-Hex-Hex-Hex-(Hex-)Hex-(HexNAc-(Hex-Hex-)Hex-)Hex-HexNAc-HexNAc+Hex	Hex-Hex-Hex-Hex-(Hex-Hex-)Hex-(Hex-HexNAc-Hex-)Hex-HexNAc-HexNAc+Hex	Hex-Hex-Hex-Hex-(Hex-)Hex-(Hex-HexNAc-(Hex-)Hex-)Hex-HexNAc-HexNAc+Hex	Hex-Hex-Hex-Hex-Hex-(Hex-Hex-(Hex-HexNAc-)Hex-)Hex-HexNAc-HexNAc+Hex	HexNAc-Hex-Hex-Hex-Hex-(Hex-Hex-Hex-)Hex-(Hex-)Hex-HexNAc-HexNAc+Hex	Hex-Hex-Hex-Hex-Hex-(Hex-HexNAc-(Hex-Hex-)Hex-)Hex-HexNAc-HexNAc+Hex
					3239	3234	749.857	749.857	4	2995.4	32.18	538.904	-	-	No	0	1	127.58	17.22	0	FALSE	-	3-4-1-0-0		Hex-Hex-(HexNAc-Hex-)Hex-HexNAc-(DeHex-)HexNAc+Hex
					3241	3234	938.04	937.71	3	2810.11	32.2	719.84	-	-	No	0	1	101.24	1.63	0	FALSE	-	3-4-0-0-0		Hex-Hex-(HexNAc-Hex-)Hex-HexNAc-HexNAc+Hex
					3243	3234	931.885	931.382	4	3721.5	32.21	786.009	-	-	No	0	1	108.73	2.17	0	FALSE	-	2-6-1-0-0		Hex-Hex-Hex-(Hex-Hex-)Hex-HexNAc-(DeHex-)HexNAc+Hex	Hex-Hex-Hex-Hex-(Hex-)Hex-HexNAc-(DeHex-)HexNAc+Hex
					3248	3245	740.352	740.018	3	2217.03	32.24	705.571	-	-	No	0	1	101.16	0	0	FALSE	-	2-3-0-0-0		Hex-(Hex-)Hex-HexNAc-HexNAc+Hex
					3250	3245	995.47	995.129	3	2982.36	32.25	760.513	-	-	No	0	1	114.32	66.95	0	FALSE	-	4-3-0-0-0		HexNAc-(HexNAc-)Hex-(Hex-)Hex-HexNAc-HexNAc+Hex	HexNAc-Hex-(HexNAc-Hex-)Hex-HexNAc-HexNAc+Hex
					3254	3245	848.345	848.345	3	2542.01	32.27	573.582	-	-	No	0	1	5.39	100.29	0	FALSE	-	3-4-0-0-0		HexNAc-(Hex-)Hex-(Hex-)Hex-HexNAc-HexNAc+Hex	HexNAc-Hex-(Hex-Hex-)Hex-HexNAc-HexNAc+Hex	Hex-HexNAc-Hex-(Hex-)Hex-HexNAc-HexNAc+Hex
					3257	3256	663.843	663.347	2	1324.68	32.29	573.582	-	-	No	0	1	76.35	0	0	FALSE	-	2-3-0-0-0		Hex-(Hex-)Hex-HexNAc-HexNAc+Hex
					3259	3256	768.333	767.83	4	3067.29	32.3	404.43	-	-	No	0	1	32.59	183.65	0	FALSE	-	2-9-0-0-0		Hex-Hex-Hex-Hex-Hex-Hex-(Hex-Hex-)Hex-HexNAc-HexNAc+Hex	Hex-Hex-Hex-Hex-Hex-(Hex-Hex-Hex-)Hex-HexNAc-HexNAc+Hex	Hex-Hex-Hex-Hex-Hex-Hex-Hex-(Hex-)Hex-HexNAc-HexNAc+Hex	Hex-Hex-Hex-Hex-(Hex-Hex-Hex-Hex-)Hex-HexNAc-HexNAc+Hex
					3261	3256	803.338	803.338	2	1604.66	32.31	782.131	-	-	No	0	1	133.96	0	0	FALSE	-	2-3-0-0-0		Hex-(Hex-)Hex-HexNAc-HexNAc+Hex
					3263	3256	1193.88	1193.55	3	3577.63	32.32	1176.7	-	-	No	0	0.84	106.07	0.26	0	FALSE	-	3-4-1-0-0		Hex-Hex-(HexNAc-Hex-)Hex-HexNAc-(DeHex-)HexNAc+Hex
					3265	3256	929.436	929.095	3	2784.26	32.33	794.375	-	-	No	0	1	76.2	62.27	0	FALSE	-	2-5-0-0-0		Hex-Hex-(Hex-Hex-)Hex-HexNAc-HexNAc+Hex	Hex-Hex-Hex-(Hex-)Hex-HexNAc-HexNAc+Hex
					3268	3267	687.359	687.023	3	2058.05	32.35	531.994	-	-	No	0	1	115.75	0	0	FALSE	-	2-3-1-0-0		Hex-(Hex-)Hex-HexNAc-(DeHex-)HexNAc+Hex	Hex-(Hex-)Hex-HexNAc-HexNAc+Hex
					3270	3267	895.913	895.413	4	3577.62	32.36	960.617	-	-	No	0	1	101.18	0	0	FALSE	-	2-3-1-0-0		Hex-(Hex-)Hex-HexNAc-(DeHex-)HexNAc+Hex	Hex-(Hex-)Hex-HexNAc-HexNAc+Hex
					3272	3267	792.354	792.354	2	1582.69	32.37	739.242	-	-	No	0	1	101.29	0	0	FALSE	-	2-3-0-0-0		Hex-(Hex-)Hex-HexNAc-HexNAc+Hex
					3274	3267	868.014	868.014	3	2601.02	32.38	623.34	-	-	No	0	1	101.03	0	0	FALSE	-	2-3-0-0-0		Hex-(Hex-)Hex-HexNAc-HexNAc+Hex	Hex-(Hex-)Hex-HexNAc-(DeHex-)HexNAc+Hex
					3276	3267	754.36	753.861	2	1505.71	32.39	718.508	-	-	No	0	1	83.24	0	0	FALSE	-	2-3-0-0-0		Hex-(Hex-)Hex-HexNAc-HexNAc+Hex
					3279	3278	753.86	753.86	2	1505.7	32.41	537.604	-	-	No	0	1	105.37	0	0	FALSE	-	2-3-0-0-0		Hex-(Hex-)Hex-HexNAc-HexNAc+Hex
					3281	3278	1026.94	1026.94	2	2051.87	32.43	659.316	-	-	No	0	1	121.06	0	0	FALSE	-	2-3-0-0-0		Hex-(Hex-)Hex-HexNAc-HexNAc+Hex	Hex-(Hex-)Hex-HexNAc-(DeHex-)HexNAc+Hex
					3283	3278	958.101	957.769	3	2870.28	32.44	579.254	-	-	No	0	1	16.76	100	0	FALSE	-	3-3-1-0-0		Hex-(HexNAc-Hex-)Hex-HexNAc-(DeHex-)HexNAc+Hex	HexNAc-Hex-(Hex-)Hex-HexNAc-(DeHex-)HexNAc+Hex
					3287	3278	795.343	795.343	2	1588.67	32.46	659.316	-	-	No	0	1	59.92	0	0	FALSE	-	2-3-0-0-0		Hex-(Hex-)Hex-HexNAc-HexNAc+Hex	Hex-(Hex-)Hex-HexNAc-(DeHex-)HexNAc+Hex
					3290	3289	697.637	697.303	3	2088.89	32.48	670.344	-	-	No	0	1	101.7	0	0	FALSE	-	2-3-1-0-0		Hex-(Hex-)Hex-HexNAc-(DeHex-)HexNAc+Hex
					3292	3289	1017.11	1016.77	3	3047.3	32.49	562.978	-	-	No	0	0.98	0.84	102.1	0	FALSE	-	3-4-1-0-0		HexNAc-(Hex-)Hex-(Hex-)Hex-HexNAc-(DeHex-)HexNAc+Hex	HexNAc-Hex-(Hex-Hex-)Hex-HexNAc-(DeHex-)HexNAc+Hex	Hex-HexNAc-Hex-(Hex-)Hex-HexNAc-(DeHex-)HexNAc+Hex
					3294	3289	1525.16	1524.65	2	3047.29	32.5	1377.77	-	-	No	0	1	123.41	0	0	FALSE	-	2-3-0-0-0		Hex-(Hex-)Hex-HexNAc-HexNAc+Hex
					3296	3289	996.923	996.673	4	3982.66	32.51	661.337	-	-	No	0	0.87	38.86	208.61	-1	TRUE	-	4-5-0-2-0	0-0-0-1-0	NeuAc-Hex-HexNAc-(Hex-)Hex-(HexNAc-Hex-)Hex-HexNAc-HexNAc+NeuAc1	Hex-(HexNAc-)Hex-(NeuAc-Hex-HexNAc-Hex-)Hex-HexNAc-HexNAc+NeuAc1	NeuAc-Hex-HexNAc-(HexNAc-)Hex-(Hex-Hex-)Hex-HexNAc-HexNAc+NeuAc1
					3298	3289	967.44	967.44	2	1932.87	32.52	1121.59	-	-	No	0	0.72	110.93	0	0	FALSE	-	2-3-0-0-0		Hex-(Hex-)Hex-HexNAc-HexNAc+Hex
					3303	3300	651.513	651.259	4	2601.01	32.55	476.894	-	-	No	0	1	105.66	0	0	FALSE	-	2-3-0-0-0		Hex-(Hex-)Hex-HexNAc-HexNAc+Hex
					3305	3300	914.97	914.97	2	1827.92	32.56	696.369	-	-	No	0	1	116.11	0	0	FALSE	-	2-3-0-0-0		Hex-(Hex-)Hex-HexNAc-HexNAc+Hex
					3307	3300	1164.19	1163.85	3	3488.52	32.57	807.853	-	-	No	0	1	63.42	92.98	0	FALSE	-	3-6-2-0-0		DeHex-HexNAc-Hex-Hex-(Hex-)Hex-(Hex-)Hex-HexNAc-(DeHex-)HexNAc+Hex	Hex-Hex-Hex-Hex-(DeHex-HexNAc-Hex-)Hex-HexNAc-(DeHex-)HexNAc+Hex	Hex-Hex-Hex-(DeHex-HexNAc-(Hex-)Hex-)Hex-HexNAc-(DeHex-)HexNAc+Hex	Hex-Hex-(Hex-)Hex-(DeHex-HexNAc-Hex-)Hex-HexNAc-(DeHex-)HexNAc+Hex	DeHex-HexNAc-Hex-Hex-Hex-(Hex-Hex-)Hex-HexNAc-(DeHex-)HexNAc+Hex
[truncated: 4,707 more rows]
[truncated: 91 more columns]

## Sheet: Random criteria
manually	Match with precursor				120
Core Score >= 50	Branch Score >= 25	Match with precursor	with peptide		21
Core Score >= 50	Branch Score >= 25	Match with precursor	without peptide	Random	59

## Sheet: Verified Set
	MSn_Scan	Parent_Scan	Parent_Mz	Mono_Mz	Charge_State	Monoisotopic_Mass	CID_time	Y1	Peptide	Peptide_Mod	Identified_By_Mascot	Category	Category_Probability	Core_Score	Branch_Score	Append_Glycan_Score	MatchWithPrecursorMW	PPM	Full_Glycan(HexNac-Hex-deHex-NeuAC-NeuGc)	Checked
manually check	401	396	792.353	792.02	3	2373.04	15.51	681.219	NPNGTVTVISR	-	No	1	0.56	275.21	27.78	0	TRUE	3.5	2-5-0-0-0	O
	577	572	1326.59	1326.08	2	2650.15	16.52	738.727	VVANGTGTQGQLK	-	No	1	0.54	60.84	11.23	0	TRUE	6.26	2-6-0-0-0	O
	608	605	1245.07	1245.07	2	2488.12	16.71	738.773	VVANGTGTQGQLK	-	No	1	0.78	74.16	7.82	0	TRUE	2.06	2-5-0-0-0	O
	630	627	1164.54	1164.04	2	2326.07	16.84	738.737	VVANGTGTQGQLK	-	No	1	0.7	134.9	0	0	TRUE	3.46	2-4-0-0-0	O
	652	649	1083.01	1083.01	2	2164	16.97	1272.82	-	-	No	0	1	112.64	0	-1	TRUE	-	3-3-0-0-0	X
	698	693	948.729	948.392	3	2842.15	17.22	672.657	NNHTASILDR	-	No	1	0.99	238.1	186.73	0	TRUE	1.12	2-8-0-0-0	O
	711	704	1237.57	1237.06	2	2472.11	17.29	738.704	-	-	No	0	0.99	157.78	9.94	-1	TRUE	-	2-4-1-0-0	O
[truncated: 190 more rows]
